# Supplementary material
Source: Royal Society of Chemistry journal article supplement (doi:10.1039/d5en01157d)
Supplement: d5en01157d1.xlsx [file d5en01157d1.xlsx]

## Sheet: Sheet 1
AU	KW_Merged	DE	ID	C1	JI	AB	coden	RP	DI	BN	SN	SO	LA	TC	PN	PP	pmid	publication_stage	PU	DB	TI	DT	url	VL	PY	AF	J9	AB_raw	TI_raw	DE_raw	CR_raw	AU_UN	AU1_UN	AU_UN_NR	SR_FULL	SR	PA	affiliations	AR	EM	BO	da	GA	eissn	earlyaccessdate	BE	FU	FX	month
PALANDRI J;REED M	MID-ATLANTIC RIDGE; PARTIAL MOLAL PROPERTIES; ZAMBALES OPHIOLITE; THERMODYNAMIC PROPERTIES; HYDROTHERMAL ACTIVITY; CONTACT METAMORPHISM; CHEMICAL-EQUILIBRIA; MINERAL ASSEMBLAGES; HIGH-PRESSURES; FRACTURE-ZONE		MID-ATLANTIC RIDGE; PARTIAL MOLAL PROPERTIES; ZAMBALES OPHIOLITE; THERMODYNAMIC PROPERTIES; HYDROTHERMAL ACTIVITY; CONTACT METAMORPHISM; CHEMICAL-EQUILIBRIA; MINERAL ASSEMBLAGES; HIGH-PRESSURES; FRACTURE-ZONE	PALANDRI, JL (CORRESPONDING AUTHOR), US GEOL SURVEY, 345 MIDDLEFIELD RD,MS 427, MENLO PK, CA 94025 USA.; US GEOL SURVEY, MENLO PK, CA 94025 USA.	GEOCHIM. COSMOCHIM. ACTA	IN A SERIES OF WATER-ROCK REACTION SIMULATIONS, WE ASSESS THE PROCESSES OF SERPENTINIZATION OF HARZBURGITE AND RELATED CALCIUM METASOMATISM RESULTING IN RODINGITE-TYPE ALTERATION, AND SEAFLOOR CARBONATE CHIMNEY PRECIPITATION. AT TEMPERATURES FROM 25 TO 300DEGREESC (P = 10 TO 100 BAR), USING EITHER FRESH WATER OR SEAWATER, SERPENTINIZATION SIMULATIONS PRODUCE AN ASSEMBLAGE COMMONLY OBSERVED IN NAT…		PALANDRI, JL (CORRESPONDING AUTHOR), US GEOL SURVEY, 345 MIDDLEFIELD RD,MS 427, MENLO PK, CA 94025 USA	10.1016/j.gca.2003.08.006		0016-7037	GEOCHIMICA ET COSMOCHIMICA ACTA	ENGLISH	231	5	1115-1133			PERGAMON-ELSEVIER SCIENCE LTD	ISI	GEOCHEMICAL MODELS OF METASOMATISM IN ULTRAMAFIC SYSTEMS: SERPENTINIZATION, RODINGITIZATION, AND SEA FLOOR CARBONATE CHIMNEY PRECIPITATION	ARTICLE		68	2004	PALANDRI JL;REED MH	GEOCHIM COSMOCHIM ACTA	In a series of water-rock reaction simulations, we assess the processes of serpentinization of harzburgite and related calcium metasomatism resulting in rodingite-type alteration, and seafloor carbonate chimney precipitation. At temperatures from 25 to 300degreesC (P = 10 to 100 bar), using either fresh water or seawater, serpentinization simulations produce an assemblage commonly observed in nat…	Geochemical models of metasomatism in ultramafic systems: Serpentinization, rodingitization, and sea floor carbonate chimney precipitation		none	JL (CORRESPONDING AUTHOR)	JL (CORRESPONDING AUTHOR)		PALANDRI J, 2004, GEOCHIM COSMOCHIM ACTA	PALANDRI J, 2004, GEOCHIM COSMOCHIM ACTA	THE BOULEVARD, LANGFORD LANE, KIDLINGTON, OXFORD OX5 1GB, ENGLAND	UNITED STATES DEPARTMENT OF THE INTERIOR; UNITED STATES GEOLOGICAL SURVEY		JLPALAND@USGS.GOV		2025-11-07	774WP	1872-9533					MAR
ERDURAN N;ISILAR O	MAGNETIC NANOPARTICLE; ALLYL METHACRYLATE; GLYCIDYL METHACRYLATE; HEAVY; METAL; WASTEWATER; ADSORPTION; AQUEOUS-SOLUTION; MERCURY IONS; REMOVAL; IMMOBILIZATION; MICROSPHERES; KINETICS; PB(II); RESIN	MAGNETIC NANOPARTICLE; ALLYL METHACRYLATE; GLYCIDYL METHACRYLATE; HEAVY; METAL; WASTEWATER; ADSORPTION	ALLYL METHACRYLATE; AQUEOUS-SOLUTION; MERCURY IONS; REMOVAL; ADSORPTION; IMMOBILIZATION; MICROSPHERES; KINETICS; PB(II); RESIN	ERDURAN, N (CORRESPONDING AUTHOR), KIRIKKALE UNIV, DEPT CHEM, TR-06532 KIRIKKALE, TURKIYE.; ERDURAN, NURAN; ISILAR, OZER, KIRIKKALE UNIV, DEPT CHEM, TR-06532 KIRIKKALE, TURKIYE.	POLYM. BULL.	MAGNETIC NANOPARTICLES HAVE GAINED SIGNIFICANT ATTENTION AS VERSATILE ADSORBENTS IN VARIOUS STUDIES DUE TO THEIR EASY APPLICATION, SIMPLE SYNTHESIS, COST-EFFECTIVENESS, AND REUSABILITY. IN THIS STUDY, WE SYNTHESIZED MAGNETIC POLY(AMA-CO-GMA) NANOPARTICLES (MAG) AND MODIFIED THEM USING ALLYL METHACRYLATE (AMA) AND GLYCIDYL METHACRYLATE (GMA). THE EPOXY GROUPS ON THE NANOPARTICLES WERE OPENED TO IN…		ERDURAN, N (CORRESPONDING AUTHOR), KIRIKKALE UNIV, DEPT CHEM, TR-06532 KIRIKKALE, TURKIYE	10.1007/s00289-024-05183-3		0170-0839	POLYMER BULLETIN	ENGLISH	3	12	10933-10952			SPRINGER	ISI	NOVEL MAGNETIC POLY(ALLYL METHACRYLATE-CO-GLYCIDYL METHACRYLATE) FE3O4 NANOPARTICLES: SYNTHESIS AND EVALUATION AS ADSORBENTS FOR HEAVY METALS	ARTICLE		81	2024	ERDURAN NURAN;ISILAR OZER	POLYM BULL	Magnetic nanoparticles have gained significant attention as versatile adsorbents in various studies due to their easy application, simple synthesis, cost-effectiveness, and reusability. In this study, we synthesized magnetic poly(AMA-co-GMA) nanoparticles (MAG) and modified them using allyl methacrylate (AMA) and glycidyl methacrylate (GMA). The epoxy groups on the nanoparticles were opened to in…	Novel magnetic poly(allyl methacrylate-co-glycidyl methacrylate) Fe3O4 nanoparticles: synthesis and evaluation as adsorbents for heavy metals	Magnetic nanoparticle; Allyl methacrylate; Glycidyl methacrylate; Heavy; metal; Wastewater; Adsorption	none	KIRIKKALE UNIV;KIRIKKALE UNIV	KIRIKKALE UNIV		ERDURAN N, 2024, POLYM BULL	ERDURAN N, 2024, POLYM BULL	ONE NEW YORK PLAZA, SUITE 4600, NEW YORK, NY, UNITED STATES	KIRIKKALE UNIVERSITY		NERDURAN@KKU.EDU.TR OZERISILAR@KKU.EDU.TR		2025-11-07	F0K2O	1436-2449	MAR 2024		KIRIKKALE UNIVERSITY [2020/089]; SCIENTIFIC RESEARCH PROJECTS COORDINATION UNIT OF KIMATH;RIMATH;KKALE UNIVERSITY	THIS WORK WAS SUPPORTED BY SCIENTIFIC RESEARCH PROJECTS COORDINATION UNIT OF K \& IMATH;R \& IMATH;KKALE UNIVERSITY. PROJECT NUMBER 2020/089.	AUG
QASIM G;VIET H N V;LEE S;LEE ;WOOJIN W;HAN S	NANOSCALE ZERO-VALENT IRON; DIVALENT MERCURY; REDUCTION; NATURAL ORGANIC; MATTER; GLUTATHIONE; HUMIC-ACID; ZEROVALENT IRON; WASTE-WATER; COMPLEX-FORMATION; FERRIC; IRON; NANOPARTICLES; OXIDATION; NZVI; AGGREGATION; REMEDIATION	NANOSCALE ZERO-VALENT IRON; DIVALENT MERCURY; REDUCTION; NATURAL ORGANIC; MATTER; GLUTATHIONE	HUMIC-ACID; ZEROVALENT IRON; WASTE-WATER; COMPLEX-FORMATION; FERRIC; IRON; NANOPARTICLES; OXIDATION; NZVI; AGGREGATION; REMEDIATION	HAN, S (CORRESPONDING AUTHOR), GWANGJU INST SCI \& TECHNOL GIST, SCH EARTH SCI \& ENVIRONM ENGN, GWANGJU 61005, SOUTH KOREA.; LEE, W (CORRESPONDING AUTHOR), NAZARBAYEV UNIV, DEPT CIVIL ENGN, 53 KABANBAY BATYR AVE, ASTANA 010000, KAZAKHSTAN.; QASIM, GHULAM HUSSAIN; VIET HUU NGUYEN; LEE, SANGWOOK; HAN, SEUNGHEE, GWANGJU INST SCI \& TECHNOL GIST, SCH EARTH SCI \& ENVIRONM ENGN, GWANGJU 61005, SOUTH …	J. HAZARD. MATER.	ALTHOUGH THERE HAVE BEEN MULTIPLE STUDIES ON THE EFFECTS OF NATURAL ORGANIC MATTER (NOM) ON ZERO-VALENT IRON (ZVI) REMOVAL OF SEVERAL REGULATED HEAVY METAL IONS FROM CONTAMINATED WATER, THE ROLE OF NOM ON HG(II) REMOVAL BY NANOSCALE ZVI (NZVI) HAS NOT YET BEEN STUDIED. THE EXPERIMENTAL RESULTS SHOWED THAT IN THE PRESENCE OF 100 MG L-1 OF SUWANNEE RIVER NOM (SRNOM), THE HG(II) REMOVAL RATIO BY NZV…		HAN, S (CORRESPONDING AUTHOR), GWANGJU INST SCI \& TECHNOL GIST, SCH EARTH SCI \& ENVIRONM ENGN, GWANGJU 61005, SOUTH KOREA	10.1016/j.jhazmat.2020.122874		0304-3894	JOURNAL OF HAZARDOUS MATERIALS	ENGLISH	12					ELSEVIER	ISI	COUNTEREFFECT OF GLUTATHIONE ON DIVALENT MERCURY REMOVAL BY NANOSCALE ZERO-VALENT IRON IN THE PRESENCE OF NATURAL ORGANIC MATTER	ARTICLE		398	2020	QASIM GHULAM HUSSAIN;VIET HUU NGUYEN;LEE SANGWOOK;LEE; WOOJIN;HAN SEUNGHEE	J HAZARD MATER	Although there have been multiple studies on the effects of natural organic matter (NOM) on zero-valent iron (ZVI) removal of several regulated heavy metal ions from contaminated water, the role of NOM on Hg(II) removal by nanoscale ZVI (nZVI) has not yet been studied. The experimental results showed that in the presence of 100 mg L-1 of Suwannee River NOM (SRNOM), the Hg(II) removal ratio by nZV…	Countereffect of glutathione on divalent mercury removal by nanoscale zero-valent iron in the presence of natural organic matter	Nanoscale zero-valent iron; Divalent mercury; Reduction; Natural organic; matter; Glutathione	none	SCH EARTH SCI AND ENVIRONM ENGN;NAZARBAYEV UNIV;SCH EARTH SCI AND ENVIRONM ENGN;NAZARBAYEV UNIV	SCH EARTH SCI AND ENVIRONM ENGN		QASIM G, 2020, J HAZARD MATER	QASIM G, 2020, J HAZARD MATER	RADARWEG 29, 1043 NX AMSTERDAM, NETHERLANDS	GWANGJU INSTITUTE OF SCIENCE \& TECHNOLOGY (GIST); NAZARBAYEV UNIVERSITY	122874	WOOJIN.LEE@NU.EDU.KZ SHAN@GIST.AC.KR		2025-11-07	NN5UI	1873-3336			NATIONAL RESEARCH FOUNDATION OF KOREA [NRF-2020R1A2C2004255]; GIST RESEARCH INSTITUTE (GRI) GRANT - GIST IN 2020	THIS STUDY WAS SUPPORTED BY THE NATIONAL RESEARCH FOUNDATION OF KOREA (GRANT NO. NRF-2020R1A2C2004255) AND BY THE GIST RESEARCH INSTITUTE (GRI) GRANT FUNDED BY GIST IN 2020.	NOV 5
QASIM G;FAREED H;LEE M;LEE W;HAN S	DEMETHYLATION; REDUCTION; MONOMETHYLMERCURY; NANOSCALE ZERO-VALENT IRON; REACTIVE OXYGEN SPECIES; MAGNESIUM-HYDROXIDE; ORGANIC POLLUTANTS; ZEROVALENT IRON; HEAVY-METALS; REMOVAL; MERCURY; OXYGEN; NZVI; PUMICE; METHYLMERCURY	DEMETHYLATION; REDUCTION; MONOMETHYLMERCURY; NANOSCALE ZERO-VALENT IRON; REACTIVE OXYGEN SPECIES	MAGNESIUM-HYDROXIDE; ORGANIC POLLUTANTS; ZEROVALENT IRON; HEAVY-METALS; REMOVAL; MERCURY; OXYGEN; NZVI; PUMICE; METHYLMERCURY	HAN, S (CORRESPONDING AUTHOR), GWANGJU INST SCI \& TECHNOL GIST, SCH EARTH SCI \& ENVIRONM ENGN, 123 CHEOMDAN-GWAGIRO, GWANGJU 61005, SOUTH KOREA.; QASIM, GHULAM HUSSAIN; FAREED, HASAN; LEE, MIJIN; HAN, SEUNGHEE, GWANGJU INST SCI \& TECHNOL GIST, SCH EARTH SCI \& ENVIRONM ENGN, 123 CHEOMDAN-GWAGIRO, GWANGJU 61005, SOUTH KOREA.; QASIM, GHULAM HUSSAIN; FAREED, HASAN; LEE, MIJIN; HAN, SEUNGHEE, GWAN…	J. HAZARD. MATER.	THIS PAPER PROPOSES A FENTON-LIKE REACTION ACTIVATED BY NANOSCALE ZERO-VALENT IRON (NZVI) FOR AQUEOUS MONOMETHYLMERCURY (MMHG) DECOMPOSITION. REACTING 10 MU G L-1 MMHG WITH 280 MG L-1 NZVI REMOVED 70\% OF THE AQUEOUS MMHG WITHIN 1 MIN, AND ITS MAIN PRODUCT WAS AQUEOUS HG(II). WITHIN 1 - 5 MIN, THE AQUEOUS HG(II) DECREASED WHILE THE AQUEOUS, SOLID, AND GAS-PHASE HG(0) INCREASED WITH 92\% MMHG REMO…		HAN, S (CORRESPONDING AUTHOR), GWANGJU INST SCI \& TECHNOL GIST, SCH EARTH SCI \& ENVIRONM ENGN, 123 CHEOMDAN-GWAGIRO, GWANGJU 61005, SOUTH KOREA	10.1016/j.jhazmat.2022.128990		0304-3894	JOURNAL OF HAZARDOUS MATERIALS	ENGLISH	7					ELSEVIER	ISI	AQUEOUS MONOMETHYLMERCURY DEGRADATION USING NANOSCALE ZERO-VALENT IRON THROUGH OXIDATIVE DEMETHYLATION AND REDUCTIVE ISOLATION	ARTICLE		435	2022	QASIM GHULAM HUSSAIN;FAREED HASAN;LEE MIJIN;LEE WOOJIN;HAN SEUNGHEE	J HAZARD MATER	This paper proposes a Fenton-like reaction activated by nanoscale zero-valent iron (nZVI) for aqueous monomethylmercury (MMHg) decomposition. Reacting 10 mu g L-1 MMHg with 280 mg L-1 nZVI removed 70\% of the aqueous MMHg within 1 min, and its main product was aqueous Hg(II). Within 1 - 5 min, the aqueous Hg(II) decreased while the aqueous, solid, and gas-phase Hg(0) increased with 92\% MMHg remo…	Aqueous monomethylmercury degradation using nanoscale zero-valent iron through oxidative demethylation and reductive isolation	Demethylation; Reduction; Monomethylmercury; Nanoscale zero-valent iron; Reactive oxygen species	none	SCH EARTH SCI AND ENVIRONM ENGN;SCH EARTH SCI AND ENVIRONM ENGN;GWANGJU INST SCI AND TECHNOL GIST;NAZARBAYEV UNIV	SCH EARTH SCI AND ENVIRONM ENGN		QASIM G, 2022, J HAZARD MATER	QASIM G, 2022, J HAZARD MATER	RADARWEG 29, 1043 NX AMSTERDAM, NETHERLANDS	GWANGJU INSTITUTE OF SCIENCE \& TECHNOLOGY (GIST); GWANGJU INSTITUTE OF SCIENCE \& TECHNOLOGY (GIST); NAZARBAYEV UNIVERSITY	128990	SHAN@GIST.AC.KR		2025-11-07	1K6YS	1873-3336	MAY 2022		NATIONAL RESEARCH FOUNDATION (NRF) - KOREAN GOVERNMENT [2021R1A5A1028138, 2020R1A2C2004255]	THIS WORK WAS SUPPORTED BY A NATIONAL RESEARCH FOUNDATION (NRF) GRANT FUNDED BY THE KOREAN GOVERNMENT (2021R1A5A1028138 AND 2020R1A2C2004255) . WE ARE GRATEFUL FOR THE OPPORTUNITY TO USE PROFESSOR CHANG-HA LEE'S LABORATORY AT SEOUL NATIONAL UNIVERSITY FOR THE ESR ANALYSIS.	AUG 5
CHAPMAN E;MOORE C;CAMPBELL L	LEGACY GOLD MINE TAILINGS; ECOTOXICOLOGY; REMEDIATION; HG; AS; NZVI; HEXAGENIA; CIPANGOPALUDINA; CIPANGOPALUDINA-CHINENSIS; GROUNDWATER REMEDIATION; MYSTERY SNAIL; REMOVAL; WATER; ACCUMULATION; VIVIPARIDAE; CHEMISTRY; PB(II)	LEGACY GOLD MINE TAILINGS; ECOTOXICOLOGY; REMEDIATION; HG; AS; NZVI; HEXAGENIA; CIPANGOPALUDINA	CIPANGOPALUDINA-CHINENSIS; GROUNDWATER REMEDIATION; MYSTERY SNAIL; REMOVAL; WATER; ACCUMULATION; VIVIPARIDAE; CHEMISTRY; HEXAGENIA; PB(II)	CHAPMAN, EEV (CORRESPONDING AUTHOR), ST MARYS UNIV, DEPT ENVIRONM SCI, 923 ROBIE ST, HALIFAX, NS B3H 3C3, CANADA.; CHAPMAN, ELLEN EMILY VANESSA; CAMPBELL, LINDA M., ST MARYS UNIV, DEPT ENVIRONM SCI, 923 ROBIE ST, HALIFAX, NS B3H 3C3, CANADA.; MOORE, CHRISTINE, INTRINSIK CORP, 5121 SACKVILLE ST,SUITE 604, HALIFAX, NS B3J 1K1, CANADA.	ENVIRON. SCI. POLLUT. RES.	GOLD MINING IN THE 1800S HAS LED TO THE CONTAMINATION OF WETLANDS WITH INTRODUCED MERCURY (HG) AND GEOGENIC ARSENIC (AS). IN SITU RISK MANAGEMENT TOOLS TO REDUCE MOBILITY AND TOXICITY OF HG AND AS ARE NEEDED TO SUPPORT NATURAL RESTORATION OF IMPACTED ECOSYSTEMS. HERE, WE EXPLORED WHETHER A NANOSCALE ZERO-VALENT IRON (NZVI) SLURRY INJECTED INTO TWO DIFFERENT CONTAMINATED WETLAND SEDIMENTS CAN REDU…		CHAPMAN, EEV (CORRESPONDING AUTHOR), ST MARYS UNIV, DEPT ENVIRONM SCI, 923 ROBIE ST, HALIFAX, NS B3H 3C3, CANADA	10.1007/s11356-020-08347-6		0944-1344	ENVIRONMENTAL SCIENCE AND POLLUTION RESEARCH	ENGLISH	10	15	18757-18772			SPRINGER HEIDELBERG	ISI	EVALUATION OF A NANOSCALE ZERO-VALENT IRON AMENDMENT AS A POTENTIAL TOOL TO REDUCE MOBILITY, TOXICITY, AND BIOACCUMULATION OF ARSENIC AND MERCURY FROM WETLAND SEDIMENTS	ARTICLE		27	2020	CHAPMAN ELLEN EMILY VANESSA;MOORE CHRISTINE;CAMPBELL LINDA M	ENVIRON SCI POLLUT RES	Gold mining in the 1800s has led to the contamination of wetlands with introduced mercury (Hg) and geogenic arsenic (As). In situ risk management tools to reduce mobility and toxicity of Hg and As are needed to support natural restoration of impacted ecosystems. Here, we explored whether a nanoscale zero-valent iron (nZVI) slurry injected into two different contaminated wetland sediments can redu…	Evaluation of a nanoscale zero-valent iron amendment as a potential tool to reduce mobility, toxicity, and bioaccumulation of arsenic and mercury from wetland sediments	Legacy gold mine tailings; Ecotoxicology; Remediation; Hg; As; nZVI; Hexagenia; Cipangopaludina	none	ST MARYS UNIV;ST MARYS UNIV	ST MARYS UNIV		CHAPMAN E, 2020, ENVIRON SCI POLLUT RES	CHAPMAN E, 2020, ENVIRON SCI POLLUT RES	TIERGARTENSTRASSE 17, D-69121 HEIDELBERG, GERMANY	SAINT MARYS UNIVERSITY - CANADA		EMILY.CHAPMAN@SMU.CA		2025-11-07	LP9VG	1614-7499	MAR 2020		NATIONAL WETLAND CONSERVATION FUND ENVIRONMENT AND CLIMATE CHANGE CANADA [ECCC GCZEC110]; NSERC DISCOVERY DEVELOPMENT GRANT [DDG-2017-00036]; SAINT MARY'S UNIVERSITY; CLEAN LEADERSHIP INTERNSHIP PROGRAM	THIS PROJECT WAS SUPPORTED BY A GRANT FROM THE NATIONAL WETLAND CONSERVATION FUND (ECCC GCZEC110) ENVIRONMENT AND CLIMATE CHANGE CANADA, NSERC DISCOVERY DEVELOPMENT GRANT (DDG-2017-00036) TO DR. LINDA CAMPBELL. INTERNS WHO ASSISTED WITH THE PROJECT WERE ALSO SUPPORTED BY SMUWORKS WORK-STUDY FUNDING FROM SAINT MARY'S UNIVERSITY AND CLEAN LEADERSHIP INTERNSHIP PROGRAM.	MAY
QASIM G;LEE S;LEE G;LEE ;WOOJIN W;HONG Y;HAN S	PERMEABLE REACTIVE BARRIER; CONTAMINATED GROUNDWATER; ZEROVALENT IRON; WASTE-WATER; HEAVY-METAL; NANOPARTICLES; REMEDIATION; OXIDATION; KINETICS; FIELD		PERMEABLE REACTIVE BARRIER; CONTAMINATED GROUNDWATER; ZEROVALENT IRON; WASTE-WATER; HEAVY-METAL; NANOPARTICLES; REMEDIATION; OXIDATION; KINETICS; FIELD	HAN, S (CORRESPONDING AUTHOR), GIST, SCH EARTH SCI \& ENGN, GWANGJU 61005, SOUTH KOREA.; QASIM, GHULAM HUSSAIN; LEE, SANGWOOK; HAN, SEUNGHEE, GIST, SCH EARTH SCI \& ENGN, GWANGJU 61005, SOUTH KOREA.; LEE, GIEHYEON, YONSEI UNIV, DEPT EARTH SYST SCI, SEOUL 120749, SOUTH KOREA.; LEE, WOOJIN, NAZARBAYEV UNIV, DEPT CIVIL \& ENVIRONM ENGN, GREEN ENVIRONM \& ENERGY LAB, NATL LAB ASTANA, ASTANA 010000, K…	ENVIRON. SCI.-WAT. RES. TECHNOL.	A SERIES OF BATCH EXPERIMENTS WERE CONDUCTED TO IDENTIFY THE EFFECTS OF DISSOLVED OXYGEN (DO) AND NITRATE ON THE REMOVAL AND REDUCTION OF HG(II) BY A PUMICE SUPPORTED NANOSCALE ZERO-VALENT IRON (P-NZVI) COMPOSITE. AFTER THE ADSORPTION AND CONSECUTIVE REDUCTION OF HG(II) IN AN ANOXIC SOLUTION, ZERO-VALENT IRON, AND FERROUS AND FERRIC IRONS WERE FOUND ON THE SURFACE OF THE P-NZVI WITH A CHAIN-LIKE …		HAN, S (CORRESPONDING AUTHOR), GIST, SCH EARTH SCI \& ENGN, GWANGJU 61005, SOUTH KOREA	10.1039/c8ew00326b		2053-1400	ENVIRONMENTAL SCIENCE-WATER RESEARCH \& TECHNOLOGY	ENGLISH	18	10	1651-1661			ROYAL SOC CHEMISTRY	ISI	DISSOLVED OXYGEN AND NITRATE EFFECTS ON THE REDUCTION AND REMOVAL OF DIVALENT MERCURY BY PUMICE SUPPORTED NANOSCALE ZERO-VALENT IRON	ARTICLE		4	2018	QASIM GHULAM HUSSAIN;LEE SANGWOOK;LEE GIEHYEON;LEE; WOOJIN;HONG YONGSEOK;HAN SEUNGHEE	ENVIRON SCI-WAT RES TECHNOL	A series of batch experiments were conducted to identify the effects of dissolved oxygen (DO) and nitrate on the removal and reduction of Hg(II) by a pumice supported nanoscale zero-valent iron (p-nZVI) composite. After the adsorption and consecutive reduction of Hg(II) in an anoxic solution, zero-valent iron, and ferrous and ferric irons were found on the surface of the p-nZVI with a chain-like …	Dissolved oxygen and nitrate effects on the reduction and removal of divalent mercury by pumice supported nanoscale zero-valent iron		none	SCH EARTH SCI AND ENGN;SCH EARTH SCI AND ENGN;YONSEI UNIV;NAZARBAYEV UNIV;KOREA UNIV	SCH EARTH SCI AND ENGN		QASIM G, 2018, ENVIRON SCI-WAT RES TECHNOL	QASIM G, 2018, ENVIRON SCI-WAT RES TECHNOL	THOMAS GRAHAM HOUSE, SCIENCE PARK, MILTON RD, CAMBRIDGE CB4 0WF, CAMBS, ENGLAND	GWANGJU INSTITUTE OF SCIENCE \& TECHNOLOGY (GIST); YONSEI UNIVERSITY; NAZARBAYEV UNIVERSITY; KOREA UNIVERSITY		SHAN@GIST.AC.KR		2025-11-07	GZ2CM	2053-1419			POLAR ACADEMIC PROGRAM OF THE KOREA POLAR RESEARCH INSTITUTE [PE18900]; GIST RESEARCH INSTITUTE (GRI) - GIST	THIS STUDY WAS SUPPORTED BY THE POLAR ACADEMIC PROGRAM (PE18900) OF THE KOREA POLAR RESEARCH INSTITUTE, AND BY THE GIST RESEARCH INSTITUTE (GRI) FUNDED BY GIST IN 2018.	OCT
ZHANG Z;LI J;ZHANG X	LOW CONCENTRATION HG(II); NZVI; S-NZVI; SULFIDATION; IMMOBILIZING; MERCURY; AQUEOUS-SOLUTION; AGING TIME; METAL-IONS; ADSORPTION; PB(II); NANO; REDUCTION; EFFICIENT	LOW CONCENTRATION HG(II); NZVI; S-NZVI; SULFIDATION; IMMOBILIZING; MERCURY	AQUEOUS-SOLUTION; AGING TIME; METAL-IONS; MERCURY; ADSORPTION; PB(II); NZVI; NANO; REDUCTION; EFFICIENT	ZHANG, XL (CORRESPONDING AUTHOR), HARBIN INST TECHNOL, SCH CIVIL \& ENVIRONM ENGN, SHENZHEN KEY LAB WATER RESOURCE APPLICAT \& ENVIRON, SHENZHEN 518055, PEOPLES R CHINA.; ZHANG, ZHAOYANG; LI, JI; ZHANG, XIAOLEI, HARBIN INST TECHNOL, SCH CIVIL \& ENVIRONM ENGN, SHENZHEN KEY LAB WATER RESOURCE APPLICAT \& ENVIRON, SHENZHEN 518055, PEOPLES R CHINA.	CHEM. ENG. J.	MERCURY IS HIGHLY TOXIC. IT IS A GREAT THREAT TO HUMAN HEALTH EVEN WITH LOW-CONCENTRATION MERCURY INGESTION. HEREIN, WE SYSTEMATICALLY EXPLORED THE PERFORMANCES AND MECHANISMS OF NANO ZERO-VALENT IRON (NZVI) AND SULFURIZED NANO ZERO-VALENT IRON (S-NZVI) FOR LOW CONCENTRATION HG(II). THE S0 PRODUCED IN THE SULFIDATION PROCESS HAS A STRONG IMMOBILIZATION EFFECT ON HG0 AND REDUCES THE VOLATILIZATION…		ZHANG, XL (CORRESPONDING AUTHOR), HARBIN INST TECHNOL, SCH CIVIL \& ENVIRONM ENGN, SHENZHEN KEY LAB WATER RESOURCE APPLICAT \& ENVIRON, SHENZHEN 518055, PEOPLES R CHINA	10.1016/j.cej.2023.144643		1385-8947	CHEMICAL ENGINEERING JOURNAL	ENGLISH	9					ELSEVIER SCIENCE SA	ISI	RAPID REMOVAL OF LOW CONCENTRATION HG(II) FROM WATER BY IRON NANOPARTICLES: EXCELLENT PERFORMANCE AND UNIQUE MECHANISM	ARTICLE		471	2023	ZHANG ZHAOYANG;LI JI;ZHANG XIAOLEI	CHEM ENG J	Mercury is highly toxic. It is a great threat to human health even with low-concentration mercury ingestion. Herein, we systematically explored the performances and mechanisms of nano zero-valent iron (nZVI) and sulfurized nano zero-valent iron (S-nZVI) for low concentration Hg(II). The S0 produced in the sulfidation process has a strong immobilization effect on Hg0 and reduces the volatilization…	Rapid removal of low concentration Hg(II) from water by iron nanoparticles: Excellent performance and unique mechanism	Low concentration Hg(II); nZVI; S-nZVI; Sulfidation; Immobilizing; mercury	none	SCH CIVIL AND ENVIRONM ENGN;SCH CIVIL AND ENVIRONM ENGN	SCH CIVIL AND ENVIRONM ENGN		ZHANG Z, 2023, CHEM ENG J	ZHANG Z, 2023, CHEM ENG J	PO BOX 564, 1001 LAUSANNE, SWITZERLAND	HARBIN INSTITUTE OF TECHNOLOGY	144643	ZHANGXIAOLEI@HIT.EDU.CN		2025-11-07	FS5M8	1873-3212	JUL 2023		SHENZHEN SCIENCE AND TECHNOLOGY INNOVATION COMMISSION [KCXFZ20201221173602008, JCYJ20200109113006046, KCXFZ202002011006362, KCXFZ2020122 1173413036, KCXFZ20211020163404006]	THIS WORK WAS SUPPORTED BY SHENZHEN SCIENCE AND TECHNOLOGY INNOVATION COMMISSION (GRANT NUMBER: KCXFZ20201221173602008, JCYJ20200109113006046, KCXFZ202002011006362, KCXFZ2020122 1173413036, AND KCXFZ20211020163404006) .	SEP 1
ARSHADI M;ABDOLMALEKI M;MOUSAVINIA F;FOROUGHIFARD ;S. S;KARIMZADEH A	AZOLLA FILICULOIDES; LEAD; MERCURY; NZVI; AQUATIC PLANT; NANOBIOADSORBENT; ZERO-VALENT IRON; NANOSCALE ZEROVALENT IRON; AQUEOUS-SOLUTION; HEAVY-METALS; METHYL-ORANGE; MIXED-OXIDES; HG-II; ADSORPTION; REDUCTION; PHOSPHATE	AZOLLA FILICULOIDES; LEAD; MERCURY; NZVI; AQUATIC PLANT; NANOBIOADSORBENT	ZERO-VALENT IRON; NANOSCALE ZEROVALENT IRON; AQUEOUS-SOLUTION; HEAVY-METALS; METHYL-ORANGE; MIXED-OXIDES; HG-II; ADSORPTION; REDUCTION; PHOSPHATE	ARSHADI, M (CORRESPONDING AUTHOR), ISLAMIC AZAD UNIV, SHIRAZ BRANCH, DEPT CHEM, POB 71955-149, SHIRAZ, IRAN.; ARSHADI, M., ISLAMIC AZAD UNIV, SHIRAZ BRANCH, DEPT CHEM, POB 71955-149, SHIRAZ, IRAN.; ABDOLMALEKI, M. K., UNIV CINCINNATI, DEPT CHEM, COLL ARTS \& SCI, 404 CROSLEY TOWER, CINCINNATI, OH 45221 USA.; MOUSAVINIA, F., PHASE PSEEZ, MEHR PETROCHEM CO, ASSALUYEH, BUSHEHR, IRAN.; FOROUGHIFARD, …	J. COLLOID INTERFACE SCI.	THIS PAPER REPORTS THE PREPARATION AND STABILIZATION OF NANO ZERO VALENT IRON (NZVI) ON A MODIFIED AQUATIC PLANT, AZOLLA FILICULOIDES, AND INVESTIGATES ITS POTENTIAL FOR THE ADSORPTION/REDUCTION OF PB(II) AND HG(II) IONS FROM AQUEOUS MEDIA EVEN AFTER SIX MONTHS OF STORAGE IN THE LAB CONDITION. XRD, TEM AND ZETA POTENTIAL RESULTS DEMONSTRATED THAT THE AZOLLA-NAOH COULD BE A GOOD STABILIZER OF AGED…		ARSHADI, M (CORRESPONDING AUTHOR), ISLAMIC AZAD UNIV, SHIRAZ BRANCH, DEPT CHEM, POB 71955-149, SHIRAZ, IRAN	10.1016/j.jcis.2016.10.002		0021-9797	JOURNAL OF COLLOID AND INTERFACE SCIENCE	ENGLISH	66		296-308			ACADEMIC PRESS INC ELSEVIER SCIENCE	ISI	NANO MODIFICATION OF NZVI WITH AN AQUATIC PLANT AZOLLA FILICULOIDES TO REMOVE PB(II) AND HG(II) FROM WATER: AGING TIME AND MECHANISM STUDY	ARTICLE		486	2017	ARSHADI M;ABDOLMALEKI M K;MOUSAVINIA F;FOROUGHIFARD; S;KARIMZADEH A	J COLLOID INTERFACE SCI	This paper reports the preparation and stabilization of nano zero valent iron (NZVI) on a modified aquatic plant, Azolla filiculoides, and investigates its potential for the adsorption/reduction of Pb(II) and Hg(II) ions from aqueous media even after six months of storage in the lab condition. XRD, TEM and zeta potential results demonstrated that the Azolla-NaOH could be a good stabilizer of aged…	Nano modification of NZVI with an aquatic plant Azolla filiculoides to remove Pb(II) and Hg(II) from water: Aging time and mechanism study	Azolla filiculoides; Lead; Mercury; NZVI; Aquatic plant; Nanobioadsorbent	none	ISLAMIC AZAD UNIV;ISLAMIC AZAD UNIV;UNIV CINCINNATI;UNIV GUILAN;YAZD UNIV	ISLAMIC AZAD UNIV		ARSHADI M, 2017, J COLLOID INTERFACE SCI	ARSHADI M, 2017, J COLLOID INTERFACE SCI	525 B ST, STE 1900, SAN DIEGO, CA 92101-4495 USA	ISLAMIC AZAD UNIVERSITY; UNIVERSITY SYSTEM OF OHIO; UNIVERSITY OF CINCINNATI; UNIVERSITY OF GUILAN; UNIVERSITY OF YAZD		MOHAMMADARSHADI@YAHOO.COM		2025-11-07	EB1GH	1095-7103			IRANIAN NANOTECHNOLOGY	WE GREATLY APPRECIATE THE SUPPORT PROVIDED BY THE IRANIAN NANOTECHNOLOGY.	JAN 15
LIU T;WANG Z;YAN X;ZHANG B	PUMICE; NANOSCALE ZERO-VALENT IRON; CHROMIUM (VI); MERCURY (II); RAY PHOTOELECTRON-SPECTROSCOPY; CORE-SHELL STRUCTURE; HEXAVALENT; CHROMIUM; ZEROVALENT IRON; CHITOSAN BEADS; AQUEOUS-SOLUTIONS; HEAVY-METALS; NANOPARTICLES; SORPTION; KINETICS	PUMICE; NANOSCALE ZERO-VALENT IRON; CHROMIUM (VI); MERCURY (II)	RAY PHOTOELECTRON-SPECTROSCOPY; CORE-SHELL STRUCTURE; HEXAVALENT; CHROMIUM; ZEROVALENT IRON; CHITOSAN BEADS; AQUEOUS-SOLUTIONS; HEAVY-METALS; NANOPARTICLES; SORPTION; KINETICS	WANG, ZL (CORRESPONDING AUTHOR), TIANJIN NORMAL UNIV, TIANJIN KEY LAB WATER RESOURCES \& ENVIRONM, TIANJIN 300387, PEOPLES R CHINA.; LIU, TINGYI; WANG, ZHONG-LIANG; YAN, XIAOXING; ZHANG, BING, TIANJIN NORMAL UNIV, TIANJIN KEY LAB WATER RESOURCES \& ENVIRONM, TIANJIN 300387, PEOPLES R CHINA.; WANG, ZHONG-LIANG, CHINESE ACAD SCI, INST GEOCHEM, STATE KEY LAB ENVIRONM GEOCHEM, GUIYANG 550002, PEOPLES…	CHEM. ENG. J.	NANOSCALE ZERO-VALENT IRON SUCCESSFULLY SUPPORTED ON PUMICE (P-NZVI) WAS USED TO REMOVE HEAVY METALS FROM WASTEWATER WITH A HIGHER REMOVAL CAPACITY AND EFFICIENCY. NZVI PARTICLES WITH A MEAN DIAMETER OF 30.6 NM ARE DISTRIBUTED UNIFORMLY ON THE SURFACE OF P-NZVI. THE THERMAL STABILITY AND MECHANICAL STRENGTH OF P-NZVI WERE ALSO OBVIOUSLY ENHANCED. P-NZVI WITH A 7.7\% NZVI MASS FRACTION HAD A SPECI…		WANG, ZL (CORRESPONDING AUTHOR), TIANJIN NORMAL UNIV, TIANJIN KEY LAB WATER RESOURCES \& ENVIRONM, TIANJIN 300387, PEOPLES R CHINA	10.1016/j.cej.2014.02.011		1385-8947	CHEMICAL ENGINEERING JOURNAL	ENGLISH	159		34-40			ELSEVIER SCIENCE SA	ISI	REMOVAL OF MERCURY (II) AND CHROMIUM (VI) FROM WASTEWATER USING A NEW AND EFFECTIVE COMPOSITE: PUMICE-SUPPORTED NANOSCALE ZERO-VALENT IRON	ARTICLE		245	2014	LIU TINGYI;WANG ZHONG-LIANG;YAN XIAOXING;ZHANG BING	CHEM ENG J	Nanoscale zero-valent iron successfully supported on pumice (P-NZVI) was used to remove heavy metals from wastewater with a higher removal capacity and efficiency. NZVI particles with a mean diameter of 30.6 nm are distributed uniformly on the surface of P-NZVI. The thermal stability and mechanical strength of P-NZVI were also obviously enhanced. P-NZVI with a 7.7\% NZVI mass fraction had a speci…	Removal of mercury (II) and chromium (VI) from wastewater using a new and effective composite: Pumice-supported nanoscale zero-valent iron	Pumice; Nanoscale zero-valent iron; Chromium (VI); Mercury (II)	none	TIANJIN NORMAL UNIV;TIANJIN NORMAL UNIV;INST GEOCHEM	TIANJIN NORMAL UNIV		LIU T, 2014, CHEM ENG J	LIU T, 2014, CHEM ENG J	PO BOX 564, 1001 LAUSANNE, SWITZERLAND	TIANJIN NORMAL UNIVERSITY; CHINESE ACADEMY OF SCIENCES; INSTITUTE OF GEOCHEMISTRY, CAS		WANGZHONGLIANG@VIP.SKLEG.CN		2025-11-07	AG2VM	1873-3212			NATIONAL SCIENCE \& TECHNOLOGY PILLAR PROGRAM [2012BAC07B00, 2012BAC07B02]; PROGRAM FOR NEW CENTURY EXCELLENT TALENTS IN UNIVERSITY [NCET-10-0954]; NATIONAL NATURAL SCIENCE FOUNDATION OF CHINA [21307090]; UNIVERSITY SCIENCE \& TECHNOLOGY DEVELOPMENT PROJECT OF TIANJIN [20110528]	THE AUTHORS THANK ZHIGANG ZHANG, QIAN WANG AND FEI HE FOR THEIR SUPPORT WITH ANALYSES. THIS WORK WAS FINANCIALLY SUPPORTED BY NATIONAL SCIENCE \& TECHNOLOGY PILLAR PROGRAM (2012BAC07B00), PROGRAM FOR NEW CENTURY EXCELLENT TALENTS IN UNIVERSITY (NCET-10-0954), NATIONAL NATURAL SCIENCE FOUNDATION OF CHINA (21307090), THE NATIONAL SCIENCE \& TECHNOLOGY PILLAR PROGRAM (2012BAC07B02) AND THE UNIVERSIT…	JUN 1
ZHANG H;LIU X;ZHOU B;CHEN Z;CHENG ;JUNDI J;ZENG K;ZHANG L;SUN H;AI Z	ACTIVE HYDROGEN SPECIES; MERCURY; PHOSPHATE; REDUCTION; ZERO-VALENT IRON; EVOLUTION REACTION; ELECTROCATALYSIS; CORROSION; REMOVAL	ACTIVE HYDROGEN SPECIES; MERCURY; PHOSPHATE; REDUCTION; ZERO-VALENT IRON	EVOLUTION REACTION; ELECTROCATALYSIS; CORROSION; REMOVAL	SUN, HW; AI, ZH (CORRESPONDING AUTHOR), CENT CHINA NORMAL UNIV, COLL CHEM, INST APPL \& ENVIRONM CHEM, KEY LAB PESTICIDE \& CHEM BIOL,MINIST EDUC,ENGN RES, WUHAN 430079, PEOPLES R CHINA.; ZHANG, HAO; LIU, XUPENG; ZHOU, BIAO; CHEN, ZIYUE; CHENG, JUNDI; ZENG, KEHANG; ZHANG, LIZHI; SUN, HONGWEI; AI, ZHIHUI, CENT CHINA NORMAL UNIV, COLL CHEM, INST APPL \& ENVIRONM CHEM, KEY LAB PESTICIDE \& CHEM BIOL…	WATER RES.	MERCURY (HG) IS A TOXIC METAL OF GREAT CONCERN, AND ITS REDUCTION FROM HG(II) TO HG(0) IS CRUCIAL TO PREVENT ITS MOBILIZATION AND TRANSFORMATION TO EVEN MORE HAZARDOUS METHYLMERCURY. FE DEGREES COULD REDUCE HG(II), BUT THE ROLE OF ACTIVE HYDROGEN SPECIES (*H) REMAINS UNEXPLORED. HEREIN, WE PREPARED THE PHOSPHATE-MODIFIED ZERO-VALENT IRON BY BALL MILLING (P-ZVIBM) AND INVESTIGATED ITS HG(II) REDUC…		SUN, HW; AI, ZH (CORRESPONDING AUTHOR), CENT CHINA NORMAL UNIV, COLL CHEM, INST APPL \& ENVIRONM CHEM, KEY LAB PESTICIDE \& CHEM BIOL,MINIST EDUC,ENGN RES, WUHAN 430079, PEOPLES R CHINA	10.1016/j.watres.2025.123787		0043-1354	WATER RESEARCH	ENGLISH	0					PERGAMON-ELSEVIER SCIENCE LTD	ISI	PHOSPHORYLATED ZEROVALENT IRON BOOSTS ACTIVE HYDROGEN SPECIES GENERATION FROM WATER DISSOCIATION FOR SUPERIOR HG(II) REDUCTION	ARTICLE		283	2025	ZHANG HAO;LIU XUPENG;ZHOU BIAO;CHEN ZIYUE;CHENG; JUNDI;ZENG KEHANG;ZHANG LIZHI;SUN HONGWEI;AI ZHIHUI	WATER RES	Mercury (Hg) is a toxic metal of great concern, and its reduction from Hg(II) to Hg(0) is crucial to prevent its mobilization and transformation to even more hazardous methylmercury. Fe degrees could reduce Hg(II), but the role of active hydrogen species (*H) remains unexplored. Herein, we prepared the phosphate-modified zero-valent iron by ball milling (P-ZVIbm) and investigated its Hg(II) reduc…	Phosphorylated zerovalent Iron boosts active hydrogen species generation from water dissociation for superior Hg(II) Reduction	Active hydrogen species; Mercury; Phosphate; Reduction; Zero-valent iron	none	CENT CHINA NORMAL UNIV;CENT CHINA NORMAL UNIV	NOTREPORTED;CENT CHINA NORMAL UNIV		ZHANG H, 2025, WATER RES	ZHANG H, 2025, WATER RES	THE BOULEVARD, LANGFORD LANE, KIDLINGTON, OXFORD OX5 1GB, ENGLAND	CENTRAL CHINA NORMAL UNIVERSITY	123787	SUNHW@CCNU.EDU.CN JENNIFER.AI@MAIL.CCNU.EDU.CN		2025-11-07	2ZV3F	1879-2448			NATIONAL NATURAL SCIENCE FOUNDATION OF CHINA [U20A20129, 22276068, U21A2039, 22076061]; KEY RESEARCH AND DEVELOPMENT PRO-GRAM OF HUBEI PROVINCE [2023BCB103]; INTERNATIONAL SCIENCE AND TECHNOLOGY COOPERATION PROJECT OF HUBEI PROVINCE [2024EHA060]; FUNDAMENTAL RESEARCH FUNDS FOR THE CENTRAL UNIVERSITIES [CCNU22JC013, CCNU24JCPT012]	WE ACKNOWLEDGE THE FINANCIAL SUPPORT FROM THE NATIONAL NATURAL SCIENCE FOUNDATION OF CHINA (GRANTS U20A20129, 22276068, U21A2039, AND 22076061) , THE KEY RESEARCH AND DEVELOPMENT PRO-GRAM OF HUBEI PROVINCE (2023BCB103) , THE INTERNATIONAL SCIENCE AND TECHNOLOGY COOPERATION PROJECT OF HUBEI PROVINCE (NO. 2024EHA060) , AND THE FUNDAMENTAL RESEARCH FUNDS FOR THE CENTRAL UNIVERSITIES (CCNU22JC013, CC…	SEP 1
LIU T;WANG Z;SUN Y	NANOSCALE ZERO-VALENT IRON; PUMICE; MERCURY (II); CHROMIUM (VI); AQUEOUS-SOLUTION; ZEROVALENT IRON; HEXAVALENT CHROMIUM; CHITOSAN BEADS; NANOPARTICLES; KINETICS; COMPOSITE; CR(VI); PARTICLES; SPECTROSCOPY	NANOSCALE ZERO-VALENT IRON; PUMICE; MERCURY (II); CHROMIUM (VI)	AQUEOUS-SOLUTION; ZEROVALENT IRON; HEXAVALENT CHROMIUM; CHITOSAN BEADS; NANOPARTICLES; KINETICS; COMPOSITE; CR(VI); PARTICLES; SPECTROSCOPY	WANG, ZL (CORRESPONDING AUTHOR), TIANJIN NORMAL UNIV, TIANJIN KEY LAB WATER RESOURCES \& ENVIRONM, TIANJIN 300387, PEOPLES R CHINA.; LIU, TINGYI; WANG, ZHONG-LIANG; SUN, YANQIU, TIANJIN NORMAL UNIV, TIANJIN KEY LAB WATER RESOURCES \& ENVIRONM, TIANJIN 300387, PEOPLES R CHINA.; WANG, ZHONG-LIANG, CHINESE ACAD SCI, INST GEOCHEM, STATE KEY LAB ENVIRONM GEOCHEM, GUIYANG 550002, PEOPLES R CHINA.	CHEM. ENG. J.	THE REMOVAL OF HEAVY METALS FROM WASTEWATER IS ONE OF THE MOST IMPORTANT ISSUES FOR THE WORLD, ESPECIALLY FROM INDUSTRIAL EFFLUENTS. PUMICE-NANOSCALE ZERO-VALENT IRON (P-NZVI) WAS SUCCESSFULLY PREPARED IN DIFFERENT EXPERIMENTAL CONDITIONS. MEANWHILE, THE SHAPE, SIZE AND DISTRIBUTION OF NZVI ON P-NZVI WERE EVALUATED USING A SCANNING ELECTRON MICROSCOPE (SEM). AT THE OPTIMUM CONDITION, NZVI WITH A …		WANG, ZL (CORRESPONDING AUTHOR), TIANJIN NORMAL UNIV, TIANJIN KEY LAB WATER RESOURCES \& ENVIRONM, TIANJIN 300387, PEOPLES R CHINA	10.1016/j.cej.2014.11.046		1385-8947	CHEMICAL ENGINEERING JOURNAL	ENGLISH	70		55-61			ELSEVIER SCIENCE SA	ISI	MANIPULATING THE MORPHOLOGY OF NANOSCALE ZERO-VALENT IRON ON PUMICE FOR REMOVAL OF HEAVY METALS FROM WASTEWATER	ARTICLE		263	2015	LIU TINGYI;WANG ZHONG-LIANG;SUN YANQIU	CHEM ENG J	The removal of heavy metals from wastewater is one of the most important issues for the world, especially from industrial effluents. Pumice-nanoscale zero-valent iron (P-NZVI) was successfully prepared in different experimental conditions. Meanwhile, the shape, size and distribution of NZVI on P-NZVI were evaluated using a scanning electron microscope (SEM). At the optimum condition, NZVI with a …	Manipulating the morphology of nanoscale zero-valent iron on pumice for removal of heavy metals from wastewater	Nanoscale zero-valent iron; Pumice; Mercury (II); Chromium (VI)	none	TIANJIN NORMAL UNIV;TIANJIN NORMAL UNIV;INST GEOCHEM	TIANJIN NORMAL UNIV		LIU T, 2015, CHEM ENG J	LIU T, 2015, CHEM ENG J	PO BOX 564, 1001 LAUSANNE, SWITZERLAND	TIANJIN NORMAL UNIVERSITY; CHINESE ACADEMY OF SCIENCES; INSTITUTE OF GEOCHEMISTRY, CAS		WANGZHONGLIANG@VIP.SKLEG.CN		2025-11-07	CA6YE	1873-3212			NATIONAL SCIENCE 82 TECHNOLOGY PILLAR PROGRAM [2012BAC07B02]; INNOVATION TEAM TRAINING PLAN OF THE TIANJIN EDUCATION COMMITTEE [TD12-5037]; NATIONAL NATURAL SCIENCE FOUNDATION OF CHINA [21307090]; TIANJIN MUNICIPAL NATURAL SCIENCE FOUNDATION OF CHINA [14JCZDJC41000]	THE AUTHORS THANK ZHIGANG ZHANG, QIAN WANG AND YUNTAO SHANG FOR THEIR SUPPORT WITH ANALYSES. THIS WORK WAS FINANCIALLY SUPPORTED BY NATIONAL SCIENCE 82 TECHNOLOGY PILLAR PROGRAM (2012BAC07B02), THE INNOVATION TEAM TRAINING PLAN OF THE TIANJIN EDUCATION COMMITTEE (TD12-5037), NATIONAL NATURAL SCIENCE FOUNDATION OF CHINA (21307090) AND TIANJIN MUNICIPAL NATURAL SCIENCE FOUNDATION OF CHINA (14JCZDJC…	MAR 1
TAVARES D;LOPES C;DANIEL-DA-SILVA A;VALE C;TRINDADE T;PEREIRA M	MERCURY; SORPTION; NATURAL WATERS; MAGNETITE NANOPARTICLES; SURFACE; MODIFICATION; COATED MAGNETITE NANOPARTICLES; NATURAL SPIKED WATERS; HEAVY-METAL; REMOVAL; MESOPOROUS SILICA; AQUEOUS-SOLUTIONS; ORGANIC-MATTER; REMEDIATION; PARTICLES; ADSORPTION	MERCURY; SORPTION; NATURAL WATERS; MAGNETITE NANOPARTICLES; SURFACE; MODIFICATION	COATED MAGNETITE NANOPARTICLES; NATURAL SPIKED WATERS; HEAVY-METAL; REMOVAL; MESOPOROUS SILICA; AQUEOUS-SOLUTIONS; ORGANIC-MATTER; REMEDIATION; PARTICLES; ADSORPTION; SORPTION	LOPES, CB (CORRESPONDING AUTHOR), UNIV AVEIRO, DEPT CHEM, CAMPUS SANTIAGO, P-3810193 AVEIRO, PORTUGAL.; LOPES, CB (CORRESPONDING AUTHOR), UNIV AVEIRO, CICECO, CAMPUS SANTIAGO, P-3810193 AVEIRO, PORTUGAL.; TAVARES, DANIELA S.; LOPES, CLAUDIA B.; DANIEL-DA-SILVA, ANA L.; TRINDADE, TITO; PEREIRA, MARIA E., UNIV AVEIRO, DEPT CHEM, CAMPUS SANTIAGO, P-3810193 AVEIRO, PORTUGAL.; TAVARES, DANIELA S.; PER…	WATER RES.	DITHIOCARBAMATE-FUNCTIONALIZED MAGNETITE NANOPARTICLES (FE3O4@SIO2/SIDTC) HAVE BEEN INVESTIGATED AS A CONVENIENT AND EFFECTIVE SORBENT FOR MERCURY REMOVAL FROM RIVER, ESTUARINE AND SEA WATERS, AND THEIR CAPABILITY TO DECREASE REALISTIC ENVIRONMENTAL CONCENTRATIONS TO THE NEW ENVIRONMENTAL QUALITY STANDARDS WAS EVALUATED. THE SORPTION KINETICS WAS WELL DESCRIBED BY THE ELOVICH MODEL AND THE INITIA…		LOPES, CB (CORRESPONDING AUTHOR), UNIV AVEIRO, DEPT CHEM, CAMPUS SANTIAGO, P-3810193 AVEIRO, PORTUGAL	10.1016/j.watres.2016.10.031		0043-1354	WATER RESEARCH	ENGLISH	24		439-449			PERGAMON-ELSEVIER SCIENCE LTD	ISI	MERCURY IN RIVER, ESTUARINE AND SEAWATERS - IS IT POSSIBLE TO DECREASE REALIST ENVIRONMENTAL CONCENTRATIONS IN ORDER TO ACHIEVE ENVIRONMENTAL QUALITY STANDARDS?	ARTICLE		106	2016	TAVARES DANIELA S;LOPES CLAUDIA B;DANIEL-DA-SILVA ANA L;VALE CARLOS;TRINDADE TITO;PEREIRA MARIA E	WATER RES	Dithiocarbamate-functionalized magnetite nanoparticles (Fe3O4@SiO2/SiDTC) have been investigated as a convenient and effective sorbent for mercury removal from river, estuarine and sea waters, and their capability to decrease realistic environmental concentrations to the new environmental quality standards was evaluated. The sorption kinetics was well described by the Elovich model and the initia…	Mercury in river, estuarine and seawaters - Is it possible to decrease realist environmental concentrations in order to achieve environmental quality standards?	Mercury; Sorption; Natural waters; Magnetite nanoparticles; Surface; modification	none	UNIV AVEIRO;UNIV AVEIRO;TAVARES;UNIV AVEIRO;TAVARES;UNIV AVEIRO;TAVARES;UNIV AVEIRO;CIIMAR INTERDISCIPLINARY CTR MARINE AND ENVIRONM RE	UNIV AVEIRO		TAVARES D, 2016, WATER RES	TAVARES D, 2016, WATER RES	THE BOULEVARD, LANGFORD LANE, KIDLINGTON, OXFORD OX5 1GB, ENGLAND	UNIVERSIDADE DE AVEIRO; UNIVERSIDADE DE AVEIRO; UNIVERSIDADE DE AVEIRO; UNIVERSIDADE DO PORTO		CLAUDIA.B.LOPES@UA.PT		2025-11-07	EC3SV				UNIVERSITY OF AVEIRO; FCT/MEC [UID/AMB/50017/2013, UID/CTM/50011/2013, UID/MULTI/04423/2013]; FEDER; PORTUGUESE FOUNDATION FOR SCIENCE AND TECHNOLOGY (FCT) [SFRH/BD//103828/2014, SFRH/BPD/99453/2014]; FUNDAÇÃO PARA A CIÊNCIA E A TECNOLOGIA [SFRH/BPD/99453/2014, SFRH/BD/103828/2014] FUNDING SOURCE: FCT	WE WOULD LIKE TO THANK UNIVERSITY OF AVEIRO, FCT/MEC FOR THE FINANCIAL SUPPORT TO CESAM, CICECO AND CIIMAR (UID/AMB/50017/2013; UID/CTM/50011/2013; UID/MULTI/04423/2013) THROUGH NATIONAL FUNDS AND, WHERE APPLICABLE, CO-FINANCED BY THE FEDER, WITHIN THE PT2020 PARTNERSHIP AGREEMENT.WE ALSO WOULD LIKE TO THANK THE NATIONAL FUNDS THROUGH THE PORTUGUESE FOUNDATION FOR SCIENCE AND TECHNOLOGY (FCT) THR…	DEC 1
WANG L;ZENG H	FE3O4@MOS2; MAGNETIC MATERIALS; HG(II) ION REMOVAL; METAL-ORGANIC FRAMEWORK; HEAVY-METALS; MOS2 NANOSHEETS; ADSORPTION; MERCURY; NANOPARTICLES; COMPOSITE; SORBENTS; MODELS	FE3O4@MOS2; MAGNETIC MATERIALS; HG(II) ION REMOVAL	METAL-ORGANIC FRAMEWORK; HEAVY-METALS; MOS2 NANOSHEETS; ADSORPTION; MERCURY; NANOPARTICLES; COMPOSITE; SORBENTS; MODELS	ZENG, HH (CORRESPONDING AUTHOR), CHANGJI UNIV, DEPT CHEM \& APPL CHEM, CHANGJI 831100, XINJIANG, PEOPLES R CHINA.; WANG, LEI, XINJIANG NORMAL UNIV, SCH CHEM \& CHEM ENGN, URUMQI 830011, XINJIANG, PEOPLES R CHINA.; ZENG, HEHUA, CHANGJI UNIV, DEPT CHEM \& APPL CHEM, CHANGJI 831100, XINJIANG, PEOPLES R CHINA.	CHEM. LETT.	AN EASILY SEGREGATED ADSORBENT FOR HIGHLY EFFICIENT REMOVAL OF MERCURIC (HG(II)) IONS FROM AQUEOUS MEDIA REMAINS A GREAT CHALLENGE. HEREIN, A NOVEL FE3O4@MOS2 CORE-SHELL MAGNETISM NANOCOMPOSITE WITH RICH SULFUR IN THE SHELL WAS FABRICATED THROUGH A FACILE IN-SITU HYDROTHERMAL METHOD, WHICH HAS HIGH ADSORPTION EFFICIENCY AND GOOD SELECTIVITY FOR HG(II) IONS AND CAN BE EASILY REMOVED BY MAGNETIC SE…		ZENG, HH (CORRESPONDING AUTHOR), CHANGJI UNIV, DEPT CHEM \& APPL CHEM, CHANGJI 831100, XINJIANG, PEOPLES R CHINA	10.1246/cl.180793		0366-7022	CHEMISTRY LETTERS	ENGLISH	5	12	1515-1518			CHEMICAL SOC JAPAN	ISI	FE3O4@MOS2 CORE-SHELL MAGNETISM NANOCOMPOSITE FOR WATER REMEDIATION THROUGH HIGHLY EFFICIENT AND SELECTIVE REMOVAL OF HG(II) IONS	ARTICLE		47	2018	WANG LEI;ZENG HEHUA	CHEM LETT	An easily segregated adsorbent for highly efficient removal of mercuric (Hg(II)) ions from aqueous media remains a great challenge. Herein, A novel Fe3O4@MoS2 core-shell magnetism nanocomposite with rich sulfur in the shell was fabricated through a facile in-situ hydrothermal method, which has high adsorption efficiency and good selectivity for Hg(II) ions and can be easily removed by magnetic se…	Fe3O4@MoS2 Core-shell Magnetism Nanocomposite for Water Remediation through Highly Efficient and Selective Removal of Hg(II) Ions	Fe3O4@MoS2; Magnetic materials; Hg(II) ion removal	none	CHANGJI UNIV;XINJIANG NORMAL UNIV;CHANGJI UNIV	CHANGJI UNIV		WANG L, 2018, CHEM LETT	WANG L, 2018, CHEM LETT	1-5 KANDA-SURUGADAI CHIYODA-KU, TOKYO, 101-8307, JAPAN	XINJIANG NORMAL UNIVERSITY; CHANGJI UNIVERSITY		ZENGHH@MS.XJB.AC.CN		2025-11-07	HE1ES	1348-0715			NATIONAL NATURE SCIENCE FOUNDATION OF CHINA [U1403295, U1703129]; CAS/SAFEA INTERNATIONAL PARTNERSHIP PROGRAM FOR CREATIVE RESEARCH TEAMS	THIS WORK WAS SUPPORTED BY THE NATIONAL NATURE SCIENCE FOUNDATION OF CHINA (GRANT NOS. U1403295 AND U1703129), AND THE CAS/SAFEA INTERNATIONAL PARTNERSHIP PROGRAM FOR CREATIVE RESEARCH TEAMS.	DEC
ADIO S;BASHEER C;HUSSEIN M;SIDDIQUI M;TAWABINI B	BIOSYNTHESIS; NANOPARTICLES; MERCURY REMOVAL; NANOSCALE ZEROVALENT IRON; IRON OXIDE; ADSORPTION; ZERO-VALENT IRON; REMOVAL; WATER; ADSORBENT; MEMBRANE; EXTRACT; SYSTEM	BIOSYNTHESIS; NANOPARTICLES; MERCURY REMOVAL; NANOSCALE ZEROVALENT IRON; IRON OXIDE; ADSORPTION	ZERO-VALENT IRON; REMOVAL; WATER; ADSORBENT; MEMBRANE; EXTRACT; SYSTEM	BASHEER, C (CORRESPONDING AUTHOR), KING FAHD UNIV PETR \& MINERALS, DEPT CHEM, DHAHRAN 31261, SAUDI ARABIA.; ADIO, SALAWU OMOBAYO; BASHEER, CHANBASHA; SIDDIQUI, MOHAMMED NAHID, KING FAHD UNIV PETR \& MINERALS, DEPT CHEM, DHAHRAN 31261, SAUDI ARABIA.; HUSSEIN, MOHAMMED OMAR, GARISSA UNIV, SCH PURE \& APPL SCI, DEPT NAT SCI, POB 1801-70100, GARISSA, KENYA.; TAWABINI, BASSAM, KING FAHD UNIV PETR \& …	J. ENVIRON. ENG.-ASCE	AN ENVIRONMENTALLY FRIENDLY APPROACH WAS ADOPTED IN THE SYNTHESIS OF NANOSCALE ZEROVALENT IRON (NZVI) AND IRON OXIDE NANOPARTICLES (FE2O3). PLANT EXTRACTS FROM ALOE VERA AND MYRTLE WERE USED AS REDUCING AGENTS FOR THE SYNTHESIS OF NZVI. PHYSICAL AND CHEMICAL PROPERTIES OF THE BIOSYNTHESIZED NANOPARTICLES WERE CHARACTERIZED. THE ADSORPTION PROPERTIES OF THE BIOSYNTHESIZED NANOPARTICLES WERE EVALUA…		BASHEER, C (CORRESPONDING AUTHOR), KING FAHD UNIV PETR \& MINERALS, DEPT CHEM, DHAHRAN 31261, SAUDI ARABIA	10.1061/(ASCE)EE.1943-7870.0001515		0733-9372	JOURNAL OF ENVIRONMENTAL ENGINEERING	ENGLISH	3	7				ASCE-AMER SOC CIVIL ENGINEERS	ISI	COMPARATIVE EVALUATION OF BIOSYNTHESIZED NANOSCALE ZEROVALENT IRON AND IRON-OXIDE NANOPARTICLES IN MERCURY ADSORPTION	ARTICLE		145	2019	ADIO SALAWU OMOBAYO;BASHEER CHANBASHA;HUSSEIN MOHAMMED OMAR;SIDDIQUI MOHAMMED NAHID;TAWABINI BASSAM	J ENVIRON ENG-ASCE	An environmentally friendly approach was adopted in the synthesis of nanoscale zerovalent iron (NZVI) and iron oxide nanoparticles (Fe2O3). Plant extracts from aloe vera and myrtle were used as reducing agents for the synthesis of NZVI. Physical and chemical properties of the biosynthesized nanoparticles were characterized. The adsorption properties of the biosynthesized nanoparticles were evalua…	Comparative Evaluation of Biosynthesized Nanoscale Zerovalent Iron and Iron-Oxide Nanoparticles in Mercury Adsorption	Biosynthesis; Nanoparticles; Mercury removal; Nanoscale zerovalent iron; Iron oxide; Adsorption	none	KING FAHD UNIV PETR AND MINERALS;KING FAHD UNIV PETR AND MINERALS;GARISSA UNIV;KING FAHD UNIV PETR AND MINERALS	KING FAHD UNIV PETR AND MINERALS		ADIO S, 2019, J ENVIRON ENG-ASCE	ADIO S, 2019, J ENVIRON ENG-ASCE	1801 ALEXANDER BELL DR, RESTON, VA 20191-4400 USA	KING FAHD UNIVERSITY OF PETROLEUM \& MINERALS; KING FAHD UNIVERSITY OF PETROLEUM \& MINERALS	04019037	CBASHEER@KFUPM.EDU.SA		2025-11-07	HZ2IR	1943-7870			DEANSHIP OF SCIENTIFIC RESEARCH AT KING FAHD UNIVERSITY OF PETROLEUM AND MINERALS [IN14012]	THE AUTHORS GRATEFULLY ACKNOWLEDGE THE FUNDING SUPPORT OF THE DEANSHIP OF SCIENTIFIC RESEARCH (PROJECT NO. IN14012) AT KING FAHD UNIVERSITY OF PETROLEUM AND MINERALS.	JUL 1
WANG Y;KANG Y;DONG J;MA H;GUO ;ZIZHANG Z;WU H;HU Z;XIE H;ZHANG J	CONSTRUCTED WETLAND; MERCURY CYCLING; IRON-BASED MATERIALS; ELECTRON; TRANSFER; MICROBIAL REACTION; MERCURY; REMEDIATION; METHYLATION; SEDIMENT; WATER; SOIL	CONSTRUCTED WETLAND; MERCURY CYCLING; IRON-BASED MATERIALS; ELECTRON; TRANSFER; MICROBIAL REACTION	MERCURY; REMEDIATION; METHYLATION; SEDIMENT; WATER; SOIL	KANG, Y (CORRESPONDING AUTHOR), QINGDAO UNIV SCI \& TECHNOL, COLL ENVIRONM \& SAFETY ENGN, QINGDAO 266042, PEOPLES R CHINA.; WANG, YUQI; KANG, YAN; DONG, JIAHAO; MA, HAOQIN, QINGDAO UNIV SCI \& TECHNOL, COLL ENVIRONM \& SAFETY ENGN, QINGDAO 266042, PEOPLES R CHINA.; GUO, ZIZHANG; WU, HAIMING; HU, ZHEN; ZHANG, JIAN, SHANDONG UNIV, SCH ENVIRONM SCI \& ENGN, KEY LAB WATER POLLUT CONTROL \& RESOURCE …	J. HAZARD. MATER.	EFFECTIVE REMOVAL OF MERCURY (HG) FROM WASTEWATER IS SIGNIFICANT DUE TO ITS HIGH TOXICITY, ESPECIALLY METHYLMERCURY (MEHG). REDUCING OF HG(II) TO HG(0) IN CONSTRUCTED WETLANDS (CWS) USING IRON-BASED MATERIALS IS AN EFFECTIVE STRATEGY FOR PREVENTING THE FORMATION OF MEHG. HOWEVER, THE SURFACE PASSIVATION OF ZERO-VALENT IRON (ZVI) LIMITS ITS APPLICATION. HEREIN, SYNERGETIC ZVI AND PYRRHOTITE WERE U…		KANG, Y (CORRESPONDING AUTHOR), QINGDAO UNIV SCI \& TECHNOL, COLL ENVIRONM \& SAFETY ENGN, QINGDAO 266042, PEOPLES R CHINA	10.1016/j.jhazmat.2024.136041		0304-3894	JOURNAL OF HAZARDOUS MATERIALS	ENGLISH	5					ELSEVIER	ISI	SYNERGETIC EFFECT OF PYRRHOTITE AND ZERO-VALENT IRON ON HG(II) REMOVAL IN CONSTRUCTED WETLAND: MECHANISMS OF ELECTRON TRANSFER AND MICROBIAL REACTION	ARTICLE		480	2024	WANG YUQI;KANG YAN;DONG JIAHAO;MA HAOQIN;GUO; ZIZHANG;WU HAIMING;HU ZHEN;XIE HUIJUN;ZHANG JIAN	J HAZARD MATER	Effective removal of mercury (Hg) from wastewater is significant due to its high toxicity, especially methylmercury (MeHg). Reducing of Hg(II) to Hg(0) in constructed wetlands (CWs) using iron-based materials is an effective strategy for preventing the formation of MeHg. However, the surface passivation of zero-valent iron (ZVI) limits its application. Herein, synergetic ZVI and pyrrhotite were u…	Synergetic effect of pyrrhotite and zero-valent iron on Hg(II) removal in constructed wetland: Mechanisms of electron transfer and microbial reaction	Constructed wetland; Mercury cycling; Iron-based materials; Electron; transfer; Microbial reaction	none	QINGDAO UNIV SCI AND TECHNOL;QINGDAO UNIV SCI AND TECHNOL;SHANDONG UNIV;SHANDONG UNIV;SHANDONG NORMAL UNIV	QINGDAO UNIV SCI AND TECHNOL		WANG Y, 2024, J HAZARD MATER	WANG Y, 2024, J HAZARD MATER	RADARWEG 29, 1043 NX AMSTERDAM, NETHERLANDS	QINGDAO UNIVERSITY OF SCIENCE \& TECHNOLOGY; SHANDONG UNIVERSITY; SHANDONG UNIVERSITY; SHANDONG NORMAL UNIVERSITY	136041	KANGYAN@QUST.EDU.CN		2025-11-07	I6X0E	1873-3336	OCT 2024		NATIONAL NATURAL SCIENCE FOUNDATION OF CHINA [52270158, 52200196]; NATURAL SCIENCE FOUNDA-TION OF SHANDONG PROVINCE [ZR2021QE120]	THIS WORK WAS SUPPORTED BY THE NATIONAL NATURAL SCIENCE FOUNDATION OF CHINA (NO. 52270158 AND 52200196) , THE NATURAL SCIENCE FOUNDA-TION OF SHANDONG PROVINCE (NO. ZR2021QE120) .	DEC 5
VERNON J;BONZONGO J	MERCURY; REMOVAL; METALLIC IRON; NANOSIZE; WASTEWATER; ZERO-VALENT IRON; PERMEABLE REACTIVE BARRIERS; LONG-TERM PERFORMANCE; IN-SITU REMEDIATION; ELEMENTAL MERCURY; ZEROVALENT IRON; ENGINEERING; ASPECTS; NITRATE REDUCTION; ARSENITE REMOVAL; WASTE-WATER	MERCURY; REMOVAL; METALLIC IRON; NANOSIZE; WASTEWATER	ZERO-VALENT IRON; PERMEABLE REACTIVE BARRIERS; LONG-TERM PERFORMANCE; IN-SITU REMEDIATION; ELEMENTAL MERCURY; ZEROVALENT IRON; ENGINEERING; ASPECTS; NITRATE REDUCTION; ARSENITE REMOVAL; WASTE-WATER	VERNON, JD (CORRESPONDING AUTHOR), UNIV FLORIDA, DEPT ENVIRONM ENGN SCI, ENGN SCH SUSTAINABLE INFRASTRUCT \& ENVIRONM, POB 116450, GAINESVILLE, FL 32611 USA.; VERNON, JULIANNE D.; BONZONGO, JEAN-CLAUDE J., UNIV FLORIDA, DEPT ENVIRONM ENGN SCI, ENGN SCH SUSTAINABLE INFRASTRUCT \& ENVIRONM, GAINESVILLE, FL 32611 USA.	J. HAZARD. MATER.	BATCH EXPERIMENTS WERE CONDUCTED TO INVESTIGATE THE INTERACTIONS BETWEEN METALLIC IRON PARTICLES AND MERCURY (HG) DISSOLVED IN AQUEOUS SOLUTIONS. THE EFFECT OF BULK ZERO VALENT IRON (ZVI) PARTICLES WAS TESTED BY USE OF (I) GRANULAR IRON AND (II) IRON PARTICLES WITH DIAMETERS IN THE NANO-SIZE RANGE AND REFERRED TO HEREIN AS NZVI. THE RESULTS SHOW THAT THE INTERACTIONS BETWEEN HGN+ AND FE ARE DOMIN…		VERNON, JD (CORRESPONDING AUTHOR), UNIV FLORIDA, DEPT ENVIRONM ENGN SCI, ENGN SCH SUSTAINABLE INFRASTRUCT \& ENVIRONM, POB 116450, GAINESVILLE, FL 32611 USA	10.1016/j.jhazmat.2014.05.054		0304-3894	JOURNAL OF HAZARDOUS MATERIALS	ENGLISH	29		408-414			ELSEVIER SCIENCE BV	ISI	VOLATILIZATION AND SORPTION OF DISSOLVED MERCURY BY METALLIC IRON OF DIFFERENT PARTICLE SIZES: IMPLICATIONS FOR TREATMENT OF MERCURY CONTAMINATED WATER EFFLUENTS	ARTICLE		276	2014	VERNON JULIANNE D;BONZONGO JEAN-CLAUDE J	J HAZARD MATER	Batch experiments were conducted to investigate the interactions between metallic iron particles and mercury (Hg) dissolved in aqueous solutions. The effect of bulk zero valent iron (ZVI) particles was tested by use of (i) granular iron and (ii) iron particles with diameters in the nano-size range and referred to herein as nZVI. The results show that the interactions between Hgn+ and Fe are domin…	Volatilization and sorption of dissolved mercury by metallic iron of different particle sizes: Implications for treatment of mercury contaminated water effluents	Mercury; Removal; Metallic iron; Nanosize; Wastewater	none	UNIV FLORIDA;UNIV FLORIDA	UNIV FLORIDA		VERNON J, 2014, J HAZARD MATER	VERNON J, 2014, J HAZARD MATER	PO BOX 211, 1000 AE AMSTERDAM, NETHERLANDS	STATE UNIVERSITY SYSTEM OF FLORIDA; UNIVERSITY OF FLORIDA		JL\_VERNON@YAHOO.COM BONZONGO@UFL.EDU		2025-11-07	AM2PG	1873-3336			US NATIONAL SCIENCE FOUNDATION (NSF); SOUTH EAST ALLIANCE FOR GRADUATE EDUCATION AND THE PROFESSORIATE (SEAGEP)	THIS WORK WAS SUPPORTED BY THE US NATIONAL SCIENCE FOUNDATION (NSF) THROUGH A COMBINATION OF A GRADUATE ASSISTANT IN AREAS OF NATIONAL NEED (GANN) FELLOWSHIP AND A SOUTH EAST ALLIANCE FOR GRADUATE EDUCATION AND THE PROFESSORIATE (SEAGEP) SCHOLARSHIP TO JULIANNE VERNON. WE THANK VERONICA LLANEZA, PRIYA HRENKO, NICHOLAS KOMINANKIS FOR HELP WITH LABORATORY EXPERIMENTS.	JUL 15
HUSNAIN S;KIM J;LEE C;CHANG ;YOON-YOUNG Y;UM W;CHANG Y	ONLINE SPECTROPHOTOMETRIC DETERMINATION; IRON-OXIDE NANOPARTICLES; HEAVY-METAL IONS; AQUEOUS-SOLUTIONS; WASTE-WATER; SURFACE COMPLEXATION; ACTIVATED CARBON; ADSORPTION; SORPTION; PRECONCENTRATION		ONLINE SPECTROPHOTOMETRIC DETERMINATION; IRON-OXIDE NANOPARTICLES; HEAVY-METAL IONS; AQUEOUS-SOLUTIONS; WASTE-WATER; SURFACE COMPLEXATION; ACTIVATED CARBON; ADSORPTION; SORPTION; PRECONCENTRATION	CHANG, YS (CORRESPONDING AUTHOR), POHANG UNIV SCI \& TECHNOL POSTECH, SCH ENVIRONM SCI \& ENGN, POHANG 790784, SOUTH KOREA.; HUSNAIN, SYED M.; KIM, JAE-HAWN; LEE, CHUNG-SEOP; CHANG, YOON-SEOK, POHANG UNIV SCI \& TECHNOL POSTECH, SCH ENVIRONM SCI \& ENGN, POHANG 790784, SOUTH KOREA.; CHANG, YOON-YOUNG, KWANGWOON UNIV, DEPT ENVIRONM ENGN, SEOUL 139701, SOUTH KOREA.; UM, WOOYONG, POSTECH, DIV ADV NU…	RSC ADV.	A NEW NANOMATERIAL, NALIDIXIC ACID GRAFTED MAGNETITE (FE3O4/NA), WAS SYNTHESIZED VIA A CHEMICAL REACTION WITH NANO SIZED MAGNETITE PARTICLES. THE FE3O4/NA WAS SUPERPARAMAGNETIC AT ROOM TEMPERATURE AND COULD BE SEPARATED BY AN EXTERNAL MAGNETIC FIELD. THE PRESENCE OF MERCURY IN GROUNDWATER IN WIDE SCALE INDUSTRIAL AREAS OF THE WORLD HAS BEEN A HUGE PROBLEM AND THE PREPARED FE3O4/NA NANOPARTICLES S…		CHANG, YS (CORRESPONDING AUTHOR), POHANG UNIV SCI \& TECHNOL POSTECH, SCH ENVIRONM SCI \& ENGN, POHANG 790784, SOUTH KOREA	10.1039/c5ra25927d		2046-2069	RSC ADVANCES	ENGLISH	18	42	35825-35832			ROYAL SOC CHEMISTRY	ISI	SUPERPARAMAGNETIC NALIDIXIC ACID GRAFTED MAGNETITE (FE3O4/NA) FOR RAPID AND EFFICIENT MERCURY REMOVAL FROM WATER	ARTICLE		6	2016	HUSNAIN SYED M;KIM JAE-HAWN;LEE CHUNG-SEOP;CHANG; YOON-YOUNG;UM WOOYONG;CHANG YOON-SEOK	RSC ADV	A new nanomaterial, nalidixic acid grafted magnetite (Fe3O4/NA), was synthesized via a chemical reaction with nano sized magnetite particles. The Fe3O4/NA was superparamagnetic at room temperature and could be separated by an external magnetic field. The presence of mercury in groundwater in wide scale industrial areas of the world has been a huge problem and the prepared Fe3O4/NA nanoparticles s…	Superparamagnetic nalidixic acid grafted magnetite (Fe3O4/NA) for rapid and efficient mercury removal from water		none	POHANG UNIV SCI AND TECHNOL POSTECH;POHANG UNIV SCI AND TECHNOL POSTECH;KWANGWOON UNIV;POSTECH;PACIFIC NW NATL LAB	POHANG UNIV SCI AND TECHNOL POSTECH		HUSNAIN S, 2016, RSC ADV	HUSNAIN S, 2016, RSC ADV	THOMAS GRAHAM HOUSE, SCIENCE PARK, MILTON RD, CAMBRIDGE CB4 0WF, CAMBS, ENGLAND	POHANG UNIVERSITY OF SCIENCE \& TECHNOLOGY (POSTECH); KWANGWOON UNIVERSITY; POHANG UNIVERSITY OF SCIENCE \& TECHNOLOGY (POSTECH); UNITED STATES DEPARTMENT OF ENERGY (DOE); PACIFIC NORTHWEST NATIONAL LABORATORY		YSCHANG@POSTECH.AC.KR		2025-11-07	DJ6UV				NATIONAL RESEARCH FOUNDATION OF KOREA (NRF) - KOREA GOVERNMENT (MEST) [2011-0028723]; ``THE GAIA PROJECT'' BY THE KOREA MINISTRY OF ENVIRONMENT [RE201402059]; NATIONAL RESEARCH FOUNDATION OF KOREA (NRF) - MINISTRY OF EDUCATION, SCIENCE, AND TECHNOLOGY [4.0010363.01]	THIS WORK WAS SUPPORTED BY THE NATIONAL RESEARCH FOUNDATION OF KOREA (NRF) GRANT FUNDED BY THE KOREA GOVERNMENT (MEST) (NO. 2011-0028723) AND ``THE GAIA PROJECT'' BY THE KOREA MINISTRY OF ENVIRONMENT (RE201402059). ADDITIONAL RESEARCH FUNDING WAS SUPPORTED BY BASIC RESEARCH SUPPORT PROJECT (4.0010363.01) THROUGH THE NATIONAL RESEARCH FOUNDATION OF KOREA (NRF) FUNDED BY THE MINISTRY OF EDUCATION, …
SAHU M;PATEL R;KURWADKAR S	RM-NZVI; MERCURY (II); ADSORPTION; REDUCTION; CORE-SHELL STRUCTURE; PSEUDO-FIRST- ORDER MODEL; IN-SITU REMEDIATION; AQUEOUS-SOLUTION; ENHANCED REMOVAL; ELEMENTAL; MERCURY; METHYL-ORANGE; METALLIC-IRON; CHROMIUM VI; FLY-ASH; NANOPARTICLES; WATER	RM-NZVI; MERCURY (II); ADSORPTION; REDUCTION; CORE-SHELL STRUCTURE; PSEUDO-FIRST- ORDER MODEL	IN-SITU REMEDIATION; AQUEOUS-SOLUTION; ENHANCED REMOVAL; ELEMENTAL; MERCURY; METHYL-ORANGE; METALLIC-IRON; CHROMIUM VI; FLY-ASH; NANOPARTICLES; WATER	PATEL, RK (CORRESPONDING AUTHOR), NATL INST TECHNOL, DEPT CHEM, ROURKELA 769008, INDIA.; KURWADKAR, S (CORRESPONDING AUTHOR), CALIF STATE UNIV FULLERTON, DEPT CIVIL \& ENVIRONM ENGN, 800 N STATE COLL BLVD, FULLERTON, CA 92831 USA.; SAHU, MANOJ KUMAR, GIET UNIV, DEPT BASIC SCI \& HUMANITIES, GUNUPUR 765022, ODISHA, INDIA.; SAHU, MANOJ KUMAR; PATEL, RAJ KISHORE, NATL INST TECHNOL, DEPT CHEM, ROURKE…	J. CONTAM. HYDROL.	RECENTLY, NANOSCALE ZERO-VALENT IRON (NZVI) PARTICLES HAVE BEEN EFFICIENTLY USED IN THE REMEDIATION OF MANY HEAVY METALS, YET POTENTIAL AGGLOMERATION AND LOSS OF NZVI REMAIN A CRITICAL AREA OF RESEARCH. IN THIS STUDY, WE USED RED MUD AS A STABLE SUPPORTING MEDIUM TO DEVELOP RED MUD MODIFIED NZVI TO FORM (RM-NZVI) COMPOSITE. WE ASSESSED ITS SORPTIVE/REDUCTIVE REMOVAL OF MERCURY (HG2+) FROM AQUEOUS…		PATEL, RK (CORRESPONDING AUTHOR), NATL INST TECHNOL, DEPT CHEM, ROURKELA 769008, INDIA	10.1016/j.jconhyd.2022.103959		0169-7722	JOURNAL OF CONTAMINANT HYDROLOGY	ENGLISH	21					ELSEVIER	ISI	MECHANISTIC INSIGHT INTO THE ADSORPTION OF MERCURY (II) ON THE SURFACE OF RED MUD SUPPORTED NANOSCALE ZERO-VALENT IRON COMPOSITE	ARTICLE		246	2022	SAHU MANOJ KUMAR;PATEL RAJ KISHORE;KURWADKAR SUDARSHAN	J CONTAM HYDROL	Recently, nanoscale zero-valent iron (nZVI) particles have been efficiently used in the remediation of many heavy metals, yet potential agglomeration and loss of nZVI remain a critical area of research. In this study, we used red mud as a stable supporting medium to develop red mud modified nZVI to form (RM-nZVI) composite. We assessed its sorptive/reductive removal of mercury (Hg2+) from aqueous…	Mechanistic insight into the adsorption of mercury (II) on the surface of red mud supported nanoscale zero-valent iron composite	RM-nZVI; Mercury (II); Adsorption; Reduction; Core-shell structure; Pseudo-first- order model	none	NATL INST TECHNOL;CALIF STATE UNIV FULLERTON;GIET UNIV;NATL INST TECHNOL;CALIF STATE UNIV FULLERTON	NATL INST TECHNOL		SAHU M, 2022, J CONTAM HYDROL	SAHU M, 2022, J CONTAM HYDROL	RADARWEG 29, 1043 NX AMSTERDAM, NETHERLANDS	GIET UNIVERSITY; NATIONAL INSTITUTE OF TECHNOLOGY (NIT SYSTEM); NATIONAL INSTITUTE OF TECHNOLOGY ROURKELA; CALIFORNIA STATE UNIVERSITY SYSTEM; CALIFORNIA STATE UNIVERSITY FULLERTON	103959	MANOJSAHU.PDM@GMAIL.COM RKPATEL@NITRKL.AC.IN SKURWADKAR@FULLERTON.EDU		2025-11-07	YL9SF	1873-6009	JAN 2022		SCIENCE \& TECHNOLOGY DEPARTMENT, GOVERNMENT OF ODISHA, BHUBANESWAR, ODISHA, INDIA	THE AUTHORS ACKNOWLEDGE THE FINANCIAL SUPPORT FROM THE SCIENCE \& TECHNOLOGY DEPARTMENT, GOVERNMENT OF ODISHA, BHUBANESWAR, ODISHA, INDIA, FOR THE RESEARCH PROJECT. THE AUTHORS EXPRESS SINCERE THANKS TO THE DIRECTOR, NATIONAL INSTITUTE OF TECHNOLOGY, ROURKELA, AND GIET UNIVERSITY, GUNUPUR FOR ALLOWING ACCESS TO THE RESEARCH FACILITIES.	APR
QASIM G;LEE S;LEE W;HAN ;SEUNGHEE S	DIVALENT MERCURY; INDIUM; ZERO-VALENT IRON; ATOMIC HYDROGEN; REDUCTION; NI/FE BIMETALLIC NANOPARTICLES; MERCURY REMOVAL; METALLIC IRON; WATER; ADSORPTION; KINETICS; PUMICE; CR(VI); CARBON; DECHLORINATION	DIVALENT MERCURY; INDIUM; ZERO-VALENT IRON; ATOMIC HYDROGEN; REDUCTION	NI/FE BIMETALLIC NANOPARTICLES; MERCURY REMOVAL; METALLIC IRON; WATER; ADSORPTION; KINETICS; PUMICE; CR(VI); CARBON; DECHLORINATION	HAN, S (CORRESPONDING AUTHOR), GWANGJU INST SCI \& TECHNOL GIST, SCH EARTH SCI \& ENVIRONM ENGN, GWANGJU 61005, SOUTH KOREA.; QASIM, GHULAM HUSSAIN; LEE, SANGWOOK; HAN, SEUNGHEE, GWANGJU INST SCI \& TECHNOL GIST, SCH EARTH SCI \& ENVIRONM ENGN, GWANGJU 61005, SOUTH KOREA.; LEE, WOOJIN, NAZARBAYEV UNIV, DEPT CIVIL \& ENVIRONM ENGN, NATL LAB ASTANA, 53 KABANBAY BATYR AVE, NUR SULTAN 020000, KAZAKHS…	APPL. CATAL. B-ENVIRON.	THE ZERO-VALENT IRON (ZVI) WAS IMPREGNATED WITH NI, CU AND IN, IN ORDER TO MAXIMIZE THE REACTIVITY AND DURABILITY FOR HG(II) REDUCTION AND REMOVAL. WHEN THE HG REMOVAL EFFICIENCY WAS TESTED WITH 0.1 MM HG(II) AT PH 7, THE IN-DOPED ZVI (IN-ZVI) SHOWED THE HIGHEST REMOVAL EFFICIENCY (99.3\%) WHILE THE HG(II) REMOVAL EFFICIENCY WAS ONLY 15 AND 3.6\% WITH NI AND CU, RESPECTIVELY. IN THE DURABILITY TE…		HAN, S (CORRESPONDING AUTHOR), GWANGJU INST SCI \& TECHNOL GIST, SCH EARTH SCI \& ENVIRONM ENGN, GWANGJU 61005, SOUTH KOREA	10.1016/j.apcatb.2020.119198		0926-3373	APPLIED CATALYSIS B-ENVIRONMENTAL	ENGLISH	30					ELSEVIER	ISI	REDUCTION AND REMOVAL OF AQUEOUS HG(II) USING INDIUM-MODIFIED ZERO-VALENT IRON PARTICLES	ARTICLE		277	2020	QASIM GHULAM HUSSAIN;LEE SANGWOOK;LEE WOOJIN;HAN; SEUNGHEE	APPL CATAL B-ENVIRON	The zero-valent iron (ZVI) was impregnated with Ni, Cu and In, in order to maximize the reactivity and durability for Hg(II) reduction and removal. When the Hg removal efficiency was tested with 0.1 mM Hg(II) at pH 7, the In-doped ZVI (In-ZVI) showed the highest removal efficiency (99.3\%) while the Hg(II) removal efficiency was only 15 and 3.6\% with Ni and Cu, respectively. In the durability te…	Reduction and removal of aqueous Hg(II) using indium-modified zero-valent iron particles	Divalent mercury; Indium; Zero-valent iron; Atomic hydrogen; Reduction	none	SCH EARTH SCI AND ENVIRONM ENGN;SCH EARTH SCI AND ENVIRONM ENGN;NAZARBAYEV UNIV	SCH EARTH SCI AND ENVIRONM ENGN		QASIM G, 2020, APPL CATAL B-ENVIRON	QASIM G, 2020, APPL CATAL B-ENVIRON	RADARWEG 29, 1043 NX AMSTERDAM, NETHERLANDS	GWANGJU INSTITUTE OF SCIENCE \& TECHNOLOGY (GIST); NAZARBAYEV UNIVERSITY	119198	SHAN@GIST.AC.KR		2025-11-07	MP2BY	1873-3883			NATIONAL RESEARCH FOUNDATION [NRF-2020R1A2C2004255]; GIST RESEARCH INSTITUTE (GRI) - GIST; NAZARBAYEV UNIVERSITY RESEARCH GRANT [284-2019//012-2019]	THIS STUDY WAS SUPPORTED BY THE NATIONAL RESEARCH FOUNDATION (GRANT NO. NRF-2020R1A2C2004255) AND THE GIST RESEARCH INSTITUTE (GRI) GRANT FUNDED BY GIST IN 2020. THE AUTHORS ARE THANKFUL FOR THE SUPPORT BY NAZARBAYEV UNIVERSITY RESEARCH GRANT (CONTRACT NO. 284-2019//012-2019) FOR THE EDITING SERVICE.	NOV 15
ETALE A;YALALA B;TUTU H;DRAKE D;C. C	MINE WATER REMEDIATION; ADSORPTION; MESOPOROUS SILICA; DENSITY; OXIDE-WATER INTERFACE; AQUEOUS-SOLUTIONS; SOUTH-AFRICA; METAL-IONS; SORPTION; RECOVERY; COMPLEXATION; REMEDIATION; GOETHITE	MINE WATER REMEDIATION; ADSORPTION; MESOPOROUS SILICA; ADSORPTION; DENSITY	OXIDE-WATER INTERFACE; AQUEOUS-SOLUTIONS; MESOPOROUS SILICA; SOUTH-AFRICA; METAL-IONS; SORPTION; RECOVERY; COMPLEXATION; REMEDIATION; GOETHITE	ETALE, A (CORRESPONDING AUTHOR), UNIV WITWATERSRAND, SCH ANIM PLANT \& ENVIRONM SCI, JOHANNESBURG, SOUTH AFRICA.; ETALE, ANITA; DRAKE, DEANNE C., UNIV WITWATERSRAND, SCH ANIM PLANT \& ENVIRONM SCI, JOHANNESBURG, SOUTH AFRICA.; YALALA, BONGANI; TUTU, HLANGANANI, UNIV WITWATERSRAND, SCH CHEM, INST MOL SCI, JOHANNESBURG, SOUTH AFRICA.	TOXICOL ENVIRON. CHEM.	MERCURY ADSORPTION BY SILICA AND MAGHEMITE NANOPARTICLES (NPS) WAS STUDIED WITH THE AIM OF COMPARING THEIR PERFORMANCE IN THE REMEDIATION OF ACID MINE DRAINAGE (AMD) CONTAMINATED WATER. CALCULATED DISTRIBUTION COEFFICIENTS (K-D) SHOWED THAT BOTH NPS ARE EXCEPTIONAL ADSORBENTS. HOWEVER, ADSORBATE COVERAGE PER UNIT AREA WAS 30TIMES HIGHER FOR MAGHEMITE THAN FOR SILICA NPS, DESPITE THE LATTER HAVING…		ETALE, A (CORRESPONDING AUTHOR), UNIV WITWATERSRAND, SCH ANIM PLANT \& ENVIRONM SCI, JOHANNESBURG, SOUTH AFRICA	10.1080/02772248.2014.976223		0277-2248	TOXICOLOGICAL AND ENVIRONMENTAL CHEMISTRY	ENGLISH	10	4	542-554			TAYLOR \& FRANCIS LTD	ISI	ADSORPTIVE REMOVAL OF MERCURY FROM ACID MINE DRAINAGE: A COMPARISON OF SILICA AND MAGHEMITE NANOPARTICLES	ARTICLE		96	2014	ETALE ANITA;YALALA BONGANI;TUTU HLANGANANI;DRAKE DEANNE; C	TOXICOL ENVIRON CHEM	Mercury adsorption by silica and maghemite nanoparticles (NPs) was studied with the aim of comparing their performance in the remediation of acid mine drainage (AMD) contaminated water. Calculated distribution coefficients (K-d) showed that both NPs are exceptional adsorbents. However, adsorbate coverage per unit area was 30times higher for maghemite than for silica NPs, despite the latter having…	Adsorptive removal of mercury from acid mine drainage: a comparison of silica and maghemite nanoparticles	mine water remediation; adsorption; mesoporous silica; adsorption; density	none	UNIV WITWATERSRAND;UNIV WITWATERSRAND;UNIV WITWATERSRAND	UNIV WITWATERSRAND		ETALE A, 2014, TOXICOL ENVIRON CHEM	ETALE A, 2014, TOXICOL ENVIRON CHEM	2-4 PARK SQUARE, MILTON PARK, ABINGDON OR14 4RN, OXON, ENGLAND	UNIVERSITY OF WITWATERSRAND; UNIVERSITY OF WITWATERSRAND		AETALE@GMAIL.COM		2025-11-07	AT7WT	1029-0486			GLOBAL CHANGE AND SUSTAINABILITY RESEARCH INSTITUTE (GCSRI) OF THE UNIVERSITY OF THE WITWATERSRAND	THIS WORK WAS FUNDED BY THE GLOBAL CHANGE AND SUSTAINABILITY RESEARCH INSTITUTE (GCSRI) OF THE UNIVERSITY OF THE WITWATERSRAND. THE ASSISTANCE OF KIRSTIN OLSEN WITH FIELD SAMPLING AND COMMENTS FROM ANONYMOUS REVIEWER ARE GRATEFULLY ACKNOWLEDGED.	APR 21
LI S;YANG L;WU J;YAO L;HAN D;LIANG Y;YIN Y;HU L;SHI J;JIANG G	MERCURY REMOVAL; MOS2; HIERARCHICAL STRUCTURE; RECYCLABLE ADSORBENT; WATER TREATMENT; METAL-ORGANIC FRAMEWORK; HG2+ ADSORPTION; NANOSHEETS; HEAVY-METALS; CAPTURE; NANOMATERIALS; CONSTRUCTION; ADSORBENT; SEDIMENT	MERCURY REMOVAL; MOS2; HIERARCHICAL STRUCTURE; RECYCLABLE ADSORBENT; WATER TREATMENT	METAL-ORGANIC FRAMEWORK; MERCURY REMOVAL; HG2+ ADSORPTION; MOS2; NANOSHEETS; HEAVY-METALS; CAPTURE; NANOMATERIALS; CONSTRUCTION; ADSORBENT; SEDIMENT	SHI, JB (CORRESPONDING AUTHOR), UNIV CHINESE ACAD SCI, HANGZHOU INST ADV STUDY, SCH ENVIRONM, HANGZHOU 310000, PEOPLES R CHINA.; SHI, JB (CORRESPONDING AUTHOR), CHINESE ACAD SCI, RES CTR ECOENVIRONM SCI, STATE KEY LAB ENVIRONM CHEM \& ECOTOXICOL, BEIJING 100085, PEOPLES R CHINA.; SHI, JB (CORRESPONDING AUTHOR), UNIV CHINESE ACAD SCI, COLL RESOURCES \& ENVIRONM, BEIJING 100049, PEOPLES R CHINA.; S…	WATER RES.	DEVELOPING PRACTICAL AND COST-EFFECTIVE ADSORBENTS WITH SATISFACTORY MERCURY (HG) REMEDIATION CAPABILITY IS INDISPENSABLE FOR AQUATIC ENVIRONMENT SAFETY AND PUBLIC HEALTH. HEREIN, A RECYCLABLE HIERARCHICAL MOS2/FE3O4 NANOCOMPOSITE (BY IN-SITU GROWTH OF MOS2 NANOSHEETS ON THE SURFACE OF FE3O4 NANOSPHERES) IS PRESENTED FOR THE SELECTIVE REMOVAL OF HG(II) FROM AQUATIC SAMPLES. IT EXHIBITED HIGH ADSO…		SHI, JB (CORRESPONDING AUTHOR), UNIV CHINESE ACAD SCI, HANGZHOU INST ADV STUDY, SCH ENVIRONM, HANGZHOU 310000, PEOPLES R CHINA	10.1016/j.watres.2023.119896		0043-1354	WATER RESEARCH	ENGLISH	45					PERGAMON-ELSEVIER SCIENCE LTD	ISI	EFFICIENT AND SELECTIVE REMOVAL OF HG(II) FROM WATER USING RECYCLABLE HIERARCHICAL MOS2/FE3O4 NANOCOMPOSITES	ARTICLE		235	2023	LI SHIYU;YANG LIN;WU JIALONG;YAO LINLIN;HAN DEMING;LIANG YONG;YIN YONGGUANG;HU LIGANG;SHI JIANBO; JIANG GUIBIN	WATER RES	Developing practical and cost-effective adsorbents with satisfactory mercury (Hg) remediation capability is indispensable for aquatic environment safety and public health. Herein, a recyclable hierarchical MoS2/Fe3O4 nanocomposite (by in-situ growth of MoS2 nanosheets on the surface of Fe3O4 nanospheres) is presented for the selective removal of Hg(II) from aquatic samples. It exhibited high adso…	Efficient and selective removal of Hg(II) from water using recyclable hierarchical MoS2/Fe3O4 nanocomposites	Mercury removal; MoS2; Hierarchical structure; Recyclable adsorbent; Water treatment	none	UNIV CHINESE ACAD SCI;CHINESE ACAD SCI;UNIV CHINESE ACAD SCI;CHINA UNIV GEOSCI;UNIV CHINESE ACAD SCI;CHINESE ACAD SCI;UNIV CHINESE ACAD SCI;CHINA UNIV GEOSCI;JIANGHAN UNIV	UNIV CHINESE ACAD SCI		LI S, 2023, WATER RES	LI S, 2023, WATER RES	THE BOULEVARD, LANGFORD LANE, KIDLINGTON, OXFORD OX5 1GB, ENGLAND	CHINESE ACADEMY OF SCIENCES; UNIVERSITY OF CHINESE ACADEMY OF SCIENCES, CAS; CHINESE ACADEMY OF SCIENCES; RESEARCH CENTER FOR ECO-ENVIRONMENTAL SCIENCES (RCEES), CAS; CHINESE ACADEMY OF SCIENCES; UNIVERSITY OF CHINESE ACADEMY OF SCIENCES, CAS; CHINA UNIVERSITY OF GEOSCIENCES; JIANGHAN UNIVERSITY	119896	JBSHI@RCEES.AC.CN		2025-11-07	C3WA1	1879-2448	MAR 2023		NATIONAL KEY RESEARCH AND DEVEL-OPMENT PROGRAM OF CHINA [2020YFA0907400, 2022YFC3703700]; NATIONAL NATURAL SCIENCE FOUNDATION OF CHINA [42025704, 22076205]; SANMING PROJECT OF MEDICINE IN SHENZHEN [SZSM201811070]	ACKNOWLEDGMENTS THIS WORK WAS SUPPORTED BY THE NATIONAL KEY RESEARCH AND DEVEL-OPMENT PROGRAM OF CHINA (2020YFA0907400 AND 2022YFC3703700) , THE NATIONAL NATURAL SCIENCE FOUNDATION OF CHINA (42025704 AND 22076205) , AND THE SANMING PROJECT OF MEDICINE IN SHENZHEN (SZSM201811070) .	MAY 15
SRIKHAOW A;BUTBUREE T;PON-ON W;SRIKHIRIN T;URAISIN K;SUTTIPONPANIT K;CHAVEANGHONG S;SMITH S	ADSORPTION; MAGNETITE; MERCURY; SURFACE FUNCTIONALIZATION; CONCENTRATION AQUEOUS-SOLUTION; FE3O4 NANOPARTICLES; HG(II) REMOVAL; HG2+ REMOVAL; IONS; SHELL; NANOCOMPOSITE; MICROSPHERES; PERFORMANCE	ADSORPTION; MAGNETITE; MERCURY; SURFACE FUNCTIONALIZATION	CONCENTRATION AQUEOUS-SOLUTION; FE3O4 NANOPARTICLES; HG(II) REMOVAL; HG2+ REMOVAL; ADSORPTION; IONS; SHELL; NANOCOMPOSITE; MICROSPHERES; PERFORMANCE	SMITH, SM (CORRESPONDING AUTHOR), CTR SUSTAINABLE ENERGY \& GREEN MAT, 999 PHUTTAMONTHON SAI 4 RD, SALAYA 73170, NAKHON PATHOM, THAILAND.; SMITH, SM (CORRESPONDING AUTHOR), DEPT CHEM, 999 PHUTTAMONTHON SAI 4 RD, SALAYA 73170, NAKHON PATHOM, THAILAND.; SRIKHAOW, ASSADAWOOT, MAHIDOL UNIV, FAC SCI, MAT SCI \& ENGN GRAD PROGRAM, RAMA VI RD, BANGKOK 10400, THAILAND.; BUTBUREE, TEERA, NATL SCI \& TECHN…	APPL. SCI.-BASEL	FEATURED APPLICATION THIS STUDY HIGHLIGHTS THE UTILITY OF L-CYSTEINE, A THIOL-CONTAINING AMINO ACID, AS A FUNCTIONALIZING REAGENT FOR ENHANCING THE ADSORPTION CAPACITY OF HG(II) IONS BY CARBON-COATED MAGNETITE SORBENTS. THIS WORK REPORTS THE PREPARATION AND UTILITY OF CYSTEINE-FUNCTIONALIZED CARBON-COATED FE3O4 MATERIALS (CYS-C@FE3O4) AS EFFICIENT SORBENTS FOR REMEDIATION OF HG(II)-CONTAMINATED W…		SMITH, SM (CORRESPONDING AUTHOR), CTR SUSTAINABLE ENERGY \& GREEN MAT, 999 PHUTTAMONTHON SAI 4 RD, SALAYA 73170, NAKHON PATHOM, THAILAND	10.3390/app10228262			APPLIED SCIENCES-BASEL	ENGLISH	11	22				MDPI	ISI	EFFICIENT MERCURY REMOVAL AT ULTRALOW METAL CONCENTRATIONS BY CYSTEINE FUNCTIONALIZED CARBON-COATED MAGNETITE	ARTICLE		10	2020	SRIKHAOW ASSADAWOOT;BUTBUREE TEERA;PON-ON WEERAPHAT; SRIKHIRIN TOEMSAK;URAISIN KANCHANA;SUTTIPONPANIT KOMKRIT; CHAVEANGHONG SUWILAI;SMITH SIWAPORN MEEJOO	APPL SCI-BASEL	Featured Application This study highlights the utility of L-cysteine, a thiol-containing amino acid, as a functionalizing reagent for enhancing the adsorption capacity of Hg(II) ions by carbon-coated magnetite sorbents. This work reports the preparation and utility of cysteine-functionalized carbon-coated Fe3O4 materials (Cys-C@Fe3O4) as efficient sorbents for remediation of Hg(II)-contaminated w…	Efficient Mercury Removal at Ultralow Metal Concentrations by Cysteine Functionalized Carbon-Coated Magnetite	adsorption; magnetite; mercury; surface functionalization	none	CTR SUSTAINABLE ENERGY AND GREEN MAT;SM (CORRESPONDING AUTHOR);MAHIDOL UNIV;NATL NANOTECHNOL CTR NANOTEC;KASETSART UNIV;MAHIDOL UNIV;MAHIDOL UNIV;MAHIDOL UNIV;INNOVAT INST;CTR SUSTAINABLE ENERGY AND GREEN MAT	CTR SUSTAINABLE ENERGY AND GREEN MAT		SRIKHAOW A, 2020, APPL SCI-BASEL	SRIKHAOW A, 2020, APPL SCI-BASEL	MDPI AG, GROSSPETERANLAGE 5, CH-4052 BASEL, SWITZERLAND	MAHIDOL UNIVERSITY; NATIONAL SCIENCE \& TECHNOLOGY DEVELOPMENT AGENCY - THAILAND; NATIONAL NANOTECHNOLOGY CENTER (NANOTEC); KASETSART UNIVERSITY; MAHIDOL UNIVERSITY; MAHIDOL UNIVERSITY; MAHIDOL UNIVERSITY; PTT PUBLIC COMPANY LIMITED	8262	ASSADAWOOT.SRI@GMAIL.COM TEERA.BUT@NANOTEC.OR.TH FSCIWPP@KU.AC.TH TOEMSAK.SRI@MAHIDOL.AC.TH KANCHANA.URA@MAHIDOL.AC.TH KOMKRIT.SU@PTTPLC.COM SUWILAI.MATERIALSCIENCE@GMAIL.COM SIWAPORN.SMI@MAHIDOL.EDU		2025-11-07	OZ4UY	2076-3417			THAILAND SCIENCE RESEARCH AND INNOVATION [IRN62W0005, PHD/0119/2553]	THIS RESEARCH WAS PARTIALLY FUNDED BY THE THAILAND SCIENCE RESEARCH AND INNOVATION (GRANT NO. IRN62W0005). A.S. RECEIVED THE SCHOLARSHIP FROMTHE ROYAL GOLDEN JUBILEE PH.D. PROGRAM(GRANT NO. PHD/0119/2553).	NOV
FIGUEIRA P;LOPES C;DANIEL-DA-SILVA A;PEREIRA E;DUARTE A;TRINDADE T	MERCURY; MAGNETITE PARTICLES; DITHIOCARBAMATE FUNCTIONALIZATION; ISOTHERMS; WATER REMEDIATION; AQUEOUS-SOLUTIONS; MESOPOROUS SILICA; COMPLEXED MERCURY; ACTIVATED; CARBON; HG(II) IONS; ADSORPTION; BIOSORPTION; LEAD; HG2+; EQUILIBRIUM	MERCURY; MAGNETITE PARTICLES; DITHIOCARBAMATE FUNCTIONALIZATION; ISOTHERMS; WATER REMEDIATION	AQUEOUS-SOLUTIONS; MESOPOROUS SILICA; COMPLEXED MERCURY; ACTIVATED; CARBON; HG(II) IONS; ADSORPTION; BIOSORPTION; LEAD; HG2+; EQUILIBRIUM	LOPES, CB (CORRESPONDING AUTHOR), UNIV AVEIRO, CESAM, CAMPUS SANTIAGO, P-3810193 AVEIRO, PORTUGAL.; LOPES, C. B.; PEREIRA, E.; DUARTE, A. C., UNIV AVEIRO, CESAM, P-3810193 AVEIRO, PORTUGAL.; FIGUEIRA, P.; LOPES, C. B.; DANIEL-DA-SILVA, A. L.; PEREIRA, E.; DUARTE, A. C.; TRINDADE, T., UNIV AVEIRO, DEPT CHEM, P-3810193 AVEIRO, PORTUGAL.; FIGUEIRA, P.; DANIEL-DA-SILVA, A. L.; TRINDADE, T., UNIV AVEI…	WATER RES.	IN ORDER TO TAKE ADVANTAGE OF THE HIGH AFFINITY BETWEEN MERCURY AND SULPHUR, MAGNETITE (FE3O4) PARTICLES FUNCTIONALIZED WITH DITHIOCARBAMATE GROUPS (CS2-), WERE SYNTHESIZED TO BE USED AS A NEW TYPE OF SORBENT TO REMOVE HG (II) FROM SYNTHETIC AND NATURAL SPIKED WATERS. THE EFFECTIVENESS OF THIS TYPE OF SORBENT WAS STUDIED, AND ITS POTENTIAL AS CLEANUP AGENT FOR CONTAMINATED WATERS WAS ASSESSED. BA…		LOPES, CB (CORRESPONDING AUTHOR), UNIV AVEIRO, CESAM, CAMPUS SANTIAGO, P-3810193 AVEIRO, PORTUGAL	10.1016/j.watres.2011.08.057		0043-1354	WATER RESEARCH	ENGLISH	94	17	5773-5784			PERGAMON-ELSEVIER SCIENCE LTD	ISI	REMOVAL OF MERCURY (II) BY DITHIOCARBAMATE SURFACE FUNCTIONALIZED MAGNETITE PARTICLES: APPLICATION TO SYNTHETIC AND NATURAL SPIKED WATERS	ARTICLE		45	2011	FIGUEIRA P;LOPES C B;DANIEL-DA-SILVA A L;PEREIRA E;DUARTE A C;TRINDADE T	WATER RES	In order to take advantage of the high affinity between mercury and sulphur, magnetite (Fe3O4) particles functionalized with dithiocarbamate groups (CS2-), were synthesized to be used as a new type of sorbent to remove Hg (II) from synthetic and natural spiked waters. The effectiveness of this type of sorbent was studied, and its potential as cleanup agent for contaminated waters was assessed. Ba…	Removal of mercury (II) by dithiocarbamate surface functionalized magnetite particles: Application to synthetic and natural spiked waters	Mercury; Magnetite particles; Dithiocarbamate functionalization; Isotherms; Water remediation	none	UNIV AVEIRO;UNIV AVEIRO;UNIV AVEIRO;UNIV AVEIRO	UNIV AVEIRO		FIGUEIRA P, 2011, WATER RES	FIGUEIRA P, 2011, WATER RES	THE BOULEVARD, LANGFORD LANE, KIDLINGTON, OXFORD OX5 1GB, ENGLAND	UNIVERSIDADE DE AVEIRO; UNIVERSIDADE DE AVEIRO; UNIVERSIDADE DE AVEIRO		CLAUDIA.B.LOPES@UA.PT		2025-11-07	833OK				FUNDACAO PARA A CIENCIA E TECNOLOGIA [SFRH/BPD/45156/2008]; FUNDAÇÃO PARA A CIÊNCIA E A TECNOLOGIA [SFRH/BPD/45156/2008] FUNDING SOURCE: FCT	C.B. LOPES THANKS FUNDACAO PARA A CIENCIA E TECNOLOGIA FOR A POST-DOC GRANT (SFRH/BPD/45156/2008).	NOV 1
GIL A;AMIRI M;ABEDI-KOUPAI J;ESLAMIAN S	ZEROVALENT IRON; OSTRICH BONE ASH; COMPOSITE ADSORBENT; LEAD ADSORPTION; MERCURY ADSORPTION; ZERO-VALENT IRON; REMOVAL; WASTE; NANOPARTICLES; MERCURY(II); KINETICS; CR(VI); COPPER; NZVI	ZEROVALENT IRON; OSTRICH BONE ASH; COMPOSITE ADSORBENT; LEAD ADSORPTION; MERCURY ADSORPTION	ZERO-VALENT IRON; REMOVAL; WASTE; NANOPARTICLES; MERCURY(II); KINETICS; CR(VI); COPPER; NZVI	AMIRI, MJ (CORRESPONDING AUTHOR), FASA UNIV, COLL AGR, DEPT WATER ENGN, FASA 7461781189, IRAN.; AMIRI, MOHAMMAD JAVAD, FASA UNIV, COLL AGR, DEPT WATER ENGN, FASA 7461781189, IRAN.; ABEDI-KOUPAI, JAHANGIR; ESLAMIAN, SAEID, ISFAHAN UNIV TECHNOL, COLL AGR, DEPT WATER ENGN, ESFAHAN 8415683111, IRAN.; GIL, ANTONIO, UNIV PUBL NAVARRA, DEPT APPL CHEM, CAMPUS ARROSADIA, PAMPLONA 31006, SPAIN.	ENVIRON. SCI. POLLUT. RES.	IN THIS RESEARCH, A VERSATILE AND HIGHLY EFFICIENT METHOD FOR THE STABILIZATION OF NANOSCALE ZEROVALENT IRON PARTICLES (NZVI) ON THE SURFACE OF OSTRICH BONE ASH (OBA) WAS PRESENTED AS A NOVEL INORGANIC ADSORBENT (OBA/NZVI) FOR THE REMOVAL OF HG(II) AND PB(II) IONS FROM AQUEOUS SOLUTIONS, EVEN AFTER 1 YEAR OF STORAGE UNDER ROOM CONDITIONS. THE REMOVAL BEHAVIOR OF THE OBA/NZVI WAS ASSESSED AS A FUN…		AMIRI, MJ (CORRESPONDING AUTHOR), FASA UNIV, COLL AGR, DEPT WATER ENGN, FASA 7461781189, IRAN	10.1007/s11356-017-0508-y		0944-1344	ENVIRONMENTAL SCIENCE AND POLLUTION RESEARCH	ENGLISH	44	3	2814-2829			SPRINGER HEIDELBERG	ISI	ADSORPTION/REDUCTION OF HG(II) AND PB(II) FROM AQUEOUS SOLUTIONS BY USING BONE ASH/NZVI COMPOSITE: EFFECTS OF AGING TIME, FE LOADING QUANTITY AND CO-EXISTING IONS	ARTICLE		25	2018	GIL ANTONIO;AMIRI MOHAMMAD JAVAD;ABEDI-KOUPAI JAHANGIR; ESLAMIAN SAEID	ENVIRON SCI POLLUT RES	In this research, a versatile and highly efficient method for the stabilization of nanoscale zerovalent iron particles (nZVI) on the surface of ostrich bone ash (OBA) was presented as a novel inorganic adsorbent (OBA/nZVI) for the removal of Hg(II) and Pb(II) ions from aqueous solutions, even after 1 year of storage under room conditions. The removal behavior of the OBA/nZVI was assessed as a fun…	Adsorption/reduction of Hg(II) and Pb(II) from aqueous solutions by using bone ash/nZVI composite: effects of aging time, Fe loading quantity and co-existing ions	Zerovalent iron; Ostrich bone ash; Composite adsorbent; Lead adsorption; Mercury adsorption	none	FASA UNIV;FASA UNIV;ISFAHAN UNIV TECHNOL;UNIV PUBL NAVARRA	FASA UNIV		GIL A, 2018, ENVIRON SCI POLLUT RES	GIL A, 2018, ENVIRON SCI POLLUT RES	TIERGARTENSTRASSE 17, D-69121 HEIDELBERG, GERMANY	ISFAHAN UNIVERSITY OF TECHNOLOGY; UNIVERSIDAD PUBLICA DE NAVARRA		MJ\_AMIRI@FASAU.AC.IR KOUPAI@CC.IUT.AC.IR SAEID@CC.IUT.AC.IR		2025-11-07	FT2KN	1614-7499			IRANIAN NANOTECHNOLOGY INITIATIVE	THE AUTHORS WOULD LIKE TO THANK IRANIAN NANOTECHNOLOGY INITIATIVE FOR SUPPORTING OF THIS WORK.	JAN
GINDABA G;DEMSASH H;JAYAKUMAR ;MANI M	ADSORPTION; BIOMASS; GREEN SYNTHESIS; MERCURY REMOVAL; ADSORBENT; WASTEWATER; FUNCTIONALIZED MAGNETITE NANOPARTICLES; METHYLENE-BLUE; HEAVY-METALS; WASTE-WATER; FE3O4; IONS; NANOCOMPOSITES; EFFICIENT; HG(II); STRAW	ADSORPTION; BIOMASS; GREEN SYNTHESIS; MERCURY REMOVAL; ADSORBENT; WASTEWATER	FUNCTIONALIZED MAGNETITE NANOPARTICLES; METHYLENE-BLUE; HEAVY-METALS; WASTE-WATER; FE3O4; IONS; NANOCOMPOSITES; EFFICIENT; HG(II); STRAW	JAYAKUMAR, M (CORRESPONDING AUTHOR), HARAMAYA UNIV, INST TECHNOL, DEPT CHEM ENGN, POB 138, DIRE DAWA, ETHIOPIA.; DEMSASH, HD (CORRESPONDING AUTHOR), ADDIS ABABA UNIV, SCH CHEM \& BIOENGN, INST TECHNOL, KING GEORGE VI ST,POB 385, ADDIS ABABA, ETHIOPIA.; GINDABA, GADISSA TOKUMA; JAYAKUMAR, MANI, HARAMAYA UNIV, INST TECHNOL, DEPT CHEM ENGN, POB 138, DIRE DAWA, ETHIOPIA.; DEMSASH, HUNDESSA DESSALEGN,…	ENVIRON. MONIT. ASSESS.	IN THIS WORK, A NOVEL SURFACE-MODIFIED, GREEN-BASED WHEAT STRAW-SUPPORTED MAGNETITE NANOPARTICLES (FE3O4-NPS) WERE SYNTHESIZED VIA THE GREEN SYNTHESIS METHOD, AND THE ADSORPTION OF MERCURY (HG(II)) ION FROM AQUEOUS SOLUTIONS WAS METHODICALLY INVESTIGATED. THE SYNTHESIZED WHEAT STRAW-SUPPORTED MAGNETITE (FE3O4-WSS) NPS WERE CHARACTERIZED USING X-RAY DIFFRACTION (XRD), FOURIER TRANSFORM-INFRARED SP…		JAYAKUMAR, M (CORRESPONDING AUTHOR), HARAMAYA UNIV, INST TECHNOL, DEPT CHEM ENGN, POB 138, DIRE DAWA, ETHIOPIA	10.1007/s10661-022-10586-8		0167-6369	ENVIRONMENTAL MONITORING AND ASSESSMENT	ENGLISH	20	1				SPRINGER	ISI	GREEN SYNTHESIS, CHARACTERIZATION, AND APPLICATION OF METAL OXIDE NANOPARTICLES FOR MERCURY REMOVAL FROM AQUEOUS SOLUTION	ARTICLE		195	2023	GINDABA GADISSA TOKUMA;DEMSASH HUNDESSA DESSALEGN;JAYAKUMAR; MANI	ENVIRON MONIT ASSESS	In this work, a novel surface-modified, green-based wheat straw-supported magnetite nanoparticles (Fe3O4-NPs) were synthesized via the green synthesis method, and the adsorption of mercury (Hg(II)) ion from aqueous solutions was methodically investigated. The synthesized wheat straw-supported magnetite (Fe3O4-WSS) NPs were characterized using X-ray diffraction (XRD), Fourier transform-infrared sp…	Green synthesis, characterization, and application of metal oxide nanoparticles for mercury removal from aqueous solution	Adsorption; Biomass; Green synthesis; Mercury removal; Adsorbent; Wastewater	none	HARAMAYA UNIV;ADDIS ABABA UNIV;HARAMAYA UNIV;ADDIS ABABA UNIV	HARAMAYA UNIV		GINDABA G, 2023, ENVIRON MONIT ASSESS	GINDABA G, 2023, ENVIRON MONIT ASSESS	VAN GODEWIJCKSTRAAT 30, 3311 GZ DORDRECHT, NETHERLANDS	HARAMAYA UNIVERSITY; ADDIS ABABA UNIVERSITY	9	HUNDESSAD@GMAIL.COM DRJKIOTHU@GMAIL.COM		2025-11-07	5M4OY	1573-2959			JIMMA INSTITUTE OF TECHNOLOGY, JIMMA UNIVERSITY	THE AUTHORS SINCERELY THANK THE AUTHORITIES OF JIMMA INSTITUTE OF TECHNOLOGY, JIMMA UNIVERSITY, FOR PROVIDING THE FINANCIAL AND LABORATORY FACILITIES TO COMPLETE THE WORK SUCCESSFULLY. NO EXTERNAL FUNDING WAS INVOLVED.	JAN
MARTINIS E;DENARDIN J;CALDERON R;FLORES C;MANQUIAN-CERDA K;MALDONADO T;ARANCIBIA-MIRANDA N	IMOGOLITE; NANOSCALE ZERO VALENT IRON (NZVI); HYBRID MATERIAL; NEUROTOXIC METALS (HG AND PB) REMOVAL; METAL-IONS; AQUEOUS-SOLUTION; ZEROVALENT IRON; KINETICS; ADSORPTION; NANO; GROUNDWATER; SORPTION; ZEOLITE; NZVI	IMOGOLITE; NANOSCALE ZERO VALENT IRON (NZVI); HYBRID MATERIAL; NEUROTOXIC METALS (HG AND PB) REMOVAL	METAL-IONS; AQUEOUS-SOLUTION; ZEROVALENT IRON; KINETICS; ADSORPTION; NANO; GROUNDWATER; SORPTION; ZEOLITE; NZVI	MARTINIS, EM (CORRESPONDING AUTHOR), UNIV NACL CUYO, CONSEJO NACL INVEST CIENT \& TECN, UNCUYO, CONICET,FAC INGN, MENDOZA, ARGENTINA.; ARANCIBIA-MIRANDA, N (CORRESPONDING AUTHOR), CTR DEV NANOSCI \& NANOTECHNOL, CEDENNA, SANTIAGO, CHILE.; ARANCIBIA-MIRANDA, N (CORRESPONDING AUTHOR), UNIV SANTIAGO CHILE, FAC QUIM \& BIOL, SANTIAGO, CHILE.; MARTINIS, ESTEFANIA M., UNIV NACL CUYO, CONSEJO NACL INVES…	ENVIRON. SCI. POLLUT. RES.	A NOVEL HYBRID NANOMATERIAL, NANOSCALE ZERO-VALENT IRON (NZVI)-GRAFTED IMOGOLITE NANOTUBES (IMO), WAS SYNTHESIZED VIA A FAST AND STRAIGHTFORWARD CHEMICAL PROCEDURE. THE AS-OBTAINED NANOMATERIAL (IMO-NZVI) WAS CHARACTERIZED USING TRANSMISSION ELECTRON MICROSCOPY (TEM), ELECTROPHORETIC MOBILITY (EM), AND VIBRATING SAMPLE MAGNETOMETRY (VSM). THE PREPARED IMO-NZVI WAS SUPERPARAMAGNETIC AT ROOM TEMPER…		MARTINIS, EM (CORRESPONDING AUTHOR), UNIV NACL CUYO, CONSEJO NACL INVEST CIENT \& TECN, UNCUYO, CONICET,FAC INGN, MENDOZA, ARGENTINA	10.1007/s11356-021-17242-7		0944-1344	ENVIRONMENTAL SCIENCE AND POLLUTION RESEARCH	ENGLISH	7	14	20221-20233			SPRINGER HEIDELBERG	ISI	ENHANCED REMOVAL OF MERCURY AND LEAD BY A NOVEL AND EFFICIENT SURFACE-FUNCTIONALIZED IMOGOLITE WITH NANOSCALE ZERO-VALENT IRON MATERIAL	ARTICLE		29	2022	MARTINIS ESTEFANIA M;DENARDIN JULIANO C;CALDERON RAUL; FLORES CRISTOBAL;MANQUIAN-CERDA KAREN;MALDONADO TAMARA; ARANCIBIA-MIRANDA NICOLAS	ENVIRON SCI POLLUT RES	A novel hybrid nanomaterial, nanoscale zero-valent iron (nZVI)-grafted imogolite nanotubes (Imo), was synthesized via a fast and straightforward chemical procedure. The as-obtained nanomaterial (Imo-nZVI) was characterized using transmission electron microscopy (TEM), electrophoretic mobility (EM), and vibrating sample magnetometry (VSM). The prepared Imo-nZVI was superparamagnetic at room temper…	Enhanced removal of mercury and lead by a novel and efficient surface-functionalized imogolite with nanoscale zero-valent iron material	Imogolite; Nanoscale zero valent iron (nZVI); Hybrid material; Neurotoxic metals (hg and Pb) removal	none	UNIV NACL CUYO;CTR DEV NANOSCI AND NANOTECHNOL;UNIV SANTIAGO CHILE;UNIV NACL CUYO;CTR DEV NANOSCI AND NANOTECHNOL;UNIV BERNARDO OHIGGINS;INST INVEST AGROPECUARIAS;FLORES;UNIV SANTIAGO CHILE	UNIV NACL CUYO		MARTINIS E, 2022, ENVIRON SCI POLLUT RES	MARTINIS E, 2022, ENVIRON SCI POLLUT RES	TIERGARTENSTRASSE 17, D-69121 HEIDELBERG, GERMANY	UNIVERSITY NACIONAL CUYO MENDOZA; CONSEJO NACIONAL DE INVESTIGACIONES CIENTIFICAS Y TECNICAS (CONICET); UNIVERSIDAD BERNARDO O'HIGGINS; INSTITUTO DE INVESTIGACION AGROPECUARIA (INIA); UNIVERSIDAD DE SANTIAGO DE CHILE		EMARTINIS@MENDOZA-CONICET.GOB.AR NICOLAS.ARANCIBIA@USACH.CL		2025-11-07	ZN4QS	1614-7499	NOV 2021		CONSEJO NACIONAL DE INVESTIGACIONES CIENTIFICAS Y TECNICAS (CONICET); AGENCIA NACIONAL DE PROMOCION CIENTIFICA Y TECNOLOGICA (FONCYT) (PICT-BID); UNIVERSIDAD NACIONAL DE CUYO (ARGENTINA); FINANCIAMIENTO BASAL PARA CENTROS CIENTIFICOS Y TECNOLOGICOS DE EXCELENCIA [AFB180001]; FONDECYT [1191018, PAI 77190014, REDES 170170]; ANID/CONICYT POSTDOCTORAL FONDECYT [3180488]; CONICYT-PFCHA/DOCTORADO NACIO…	THIS WORK WAS SUPPORTED BY CONSEJO NACIONAL DE INVESTIGACIONES CIENTIFICAS Y TECNICAS (CONICET), AGENCIA NACIONAL DE PROMOCION CIENTIFICA Y TECNOLOGICA (FONCYT) (PICT-BID), UNIVERSIDAD NACIONAL DE CUYO (ARGENTINA), FINANCIAMIENTO BASAL PARA CENTROS CIENTIFICOS Y TECNOLOGICOS DE EXCELENCIA AFB180001, FONDECYT REGULAR 1191018, PAI 77190014 AND REDES 170170, CONICYT-PFCHA/DOCTORADO NACIONAL/2019-211…	MAR
ZHANG Z;LIU H;LU P;CHEN T;MA W	SIDERITE; ALPHA-FE2O3; ADSORPTION; HG(II); MECHANISM; NATURAL SIDERITE; AQUEOUS-SOLUTION; CONTAMINATED WATER; MERCURY; DYE ADSORPTION; REMOVAL; GOETHITE; IONS; (HYDR)OXIDES; COMPOSITE	SIDERITE; ALPHA-FE2O3; ADSORPTION; HG(II); MECHANISM	NATURAL SIDERITE; AQUEOUS-SOLUTION; CONTAMINATED WATER; MERCURY; ADSORPTION; DYE ADSORPTION; REMOVAL; GOETHITE; IONS; (HYDR)OXIDES; COMPOSITE	LIU, HB (CORRESPONDING AUTHOR), HEFEI UNIV TECHNOL, LAB NANOMINERALS \& MINERAL MAT, SCH RESOURCES \& ENVIRONM ENGN, HEFEI 230009, ANHUI, PEOPLES R CHINA.; ZHANG, ZEXIN; LIU, HAIBO; LU, PING; CHEN, TIANHU; MA, WENJIE, HEFEI UNIV TECHNOL, LAB NANOMINERALS \& MINERAL MAT, SCH RESOURCES \& ENVIRONM ENGN, HEFEI 230009, ANHUI, PEOPLES R CHINA.	APPL. GEOCHEM.	NANOPARTICLE ALPHA-FE2O3 WAS PREPARED BY THERMAL TREATMENT OF SIDERITE AND UTILIZED TO ADSORB HG(II) FROM AN AQUEOUS SOLUTION. THE PHYSICOCHEMICAL PROPERTIES AND HG(II) ADSORPTION CAPACITIES OF THIS ALPHA-FE2O3 PHASE WERE INVESTIGATED BY VARIOUS CHARACTERIZATION TECHNIQUES AND BATCH EQUILIBRIUM EXPERIMENTS. THE NANOSTRUCTURED ALPHA-FE2O3 OF CHARGE S-500 REVEALED THE BEST ADSORPTION CAPACITY DUE T…		LIU, HB (CORRESPONDING AUTHOR), HEFEI UNIV TECHNOL, LAB NANOMINERALS \& MINERAL MAT, SCH RESOURCES \& ENVIRONM ENGN, HEFEI 230009, ANHUI, PEOPLES R CHINA	10.1016/j.apgeochem.2018.06.016		0883-2927	APPLIED GEOCHEMISTRY	ENGLISH	28		92-99			PERGAMON-ELSEVIER SCIENCE LTD	ISI	NANOSTRUCTURED Α-FE2O3 DERIVED FROM SIDERITE AS AN EFFECTIVE HG(II) ADSORBENT: PERFORMANCE AND MECHANISM	ARTICLE		96	2018	ZHANG ZEXIN;LIU HAIBO;LU PING;CHEN TIANHU;MA WENJIE	APPL GEOCHEM	Nanoparticle alpha-Fe2O3 was prepared by thermal treatment of siderite and utilized to adsorb Hg(II) from an aqueous solution. The physicochemical properties and Hg(II) adsorption capacities of this alpha-Fe2O3 phase were investigated by various characterization techniques and batch equilibrium experiments. The nanostructured alpha-Fe2O3 of charge S-500 revealed the best adsorption capacity due t…	Nanostructured α-Fe2O3 derived from siderite as an effective Hg(II) adsorbent: Performance and mechanism	Siderite; alpha-Fe2O3; Adsorption; Hg(II); Mechanism	none	HEFEI UNIV TECHNOL;HEFEI UNIV TECHNOL	HEFEI UNIV TECHNOL		ZHANG Z, 2018, APPL GEOCHEM	ZHANG Z, 2018, APPL GEOCHEM	THE BOULEVARD, LANGFORD LANE, KIDLINGTON, OXFORD OX5 1GB, ENGLAND	HEFEI UNIVERSITY OF TECHNOLOGY		LIUHAIBOSKY116@HFUT.EDU.CN		2025-11-07	GQ9LL				NATIONAL NATURAL SCIENCE FOUNDATION OF CHINA [41772038]; ANHUI PROVINCIAL NATURAL SCIENCE FOUNDATION [1708085MD87]; FUNDAMENTAL RESEARCH FUNDS FOR THE CENTRAL UNIVERSITIES [JZ2017HGTB0196]	THIS RESEARCH WAS SUPPORTED BY NATIONAL NATURAL SCIENCE FOUNDATION OF CHINA (41772038), THE ANHUI PROVINCIAL NATURAL SCIENCE FOUNDATION (1708085MD87), AND THE FUNDAMENTAL RESEARCH FUNDS FOR THE CENTRAL UNIVERSITIES (JZ2017HGTB0196).	SEP
RAHMAN A;TEO C;IDRIS A;MISRAN ;EFFALIZA E;LEONG S	PHOTO CATALYSTS; GAMMA-FE2O3 BEADS; HG(II); PVA-ALGINATE; WASTEWATER; TREATMENT; PHOTOCATALYTIC REDUCTION; HETEROGENEOUS PHOTOCATALYSIS; WASTE-WATER; METAL-IONS; NANOPARTICLES; CR(VI)	PHOTO CATALYSTS; GAMMA-FE2O3 BEADS; HG(II); PVA-ALGINATE; WASTEWATER; TREATMENT	PHOTOCATALYTIC REDUCTION; HETEROGENEOUS PHOTOCATALYSIS; WASTE-WATER; METAL-IONS; NANOPARTICLES; CR(VI)	IDRIS, A (CORRESPONDING AUTHOR), UNIV TEKNOL MALAYSIA, IBD, FAC CHEM ENGN, DEPT BIOPROC ENGN, UTM JOHOR BAHRU 81310, JOHOR, MALAYSIA.; RAHMAN, AZURA HANIS A.; TEO, CHEE LOONG; IDRIS, ANI; MISRAN, EFFALIZA, UNIV TEKNOL MALAYSIA, IBD, FAC CHEM ENGN, DEPT BIOPROC ENGN, UTM JOHOR BAHRU 81310, JOHOR, MALAYSIA.; LEONG, SITI ASMA' NIKMAT, UNIV TEKNOL MALAYSIA, FAC CHEM ENGN, DEPT MECH ENGN, UTM JOHOR BA…	J. IND. ENG. CHEM.	MAGHEMITE (GAMMA-FE2O3) NANOPARTICLES WERE EMBEDDED IN POLYVINYL ALCOHOL (PVA) AND ALGINATE MATRIX TO PRODUCE BEADS THAT COULD BE EASILY RECOVERED WITH EXTERNAL MAGNETIC FIELD AFTER TREATING MERCURY, HG(II) IN AQUEOUS SOLUTION. 96\% OF HG(II) WAS REMOVED IN 4H UNDER SUNLIGHT, AT PH 11 AND 16\% (V/V) OF PHOTOCATALYST DOSAGE. FESEM RESULTS REVEALED THAT THE BEADS POSSESSED SIGNIFICANT SUPERPOROSITY…		IDRIS, A (CORRESPONDING AUTHOR), UNIV TEKNOL MALAYSIA, IBD, FAC CHEM ENGN, DEPT BIOPROC ENGN, UTM JOHOR BAHRU 81310, JOHOR, MALAYSIA	10.1016/j.jiec.2015.09.036		1226-086X	JOURNAL OF INDUSTRIAL AND ENGINEERING CHEMISTRY	ENGLISH	7		190-196			ELSEVIER SCIENCE INC	ISI	POLYVINYL ALCOHOL-ALGINATE FERROPHOTO GELS FOR MERCURY(II) REMOVAL	ARTICLE		33	2016	RAHMAN AZURA HANIS A;TEO CHEE LOONG;IDRIS ANI;MISRAN; EFFALIZA;LEONG SITI ASMA' NIKMAT	J IND ENG CHEM	Maghemite (gamma-Fe2O3) nanoparticles were embedded in polyvinyl alcohol (PVA) and alginate matrix to produce beads that could be easily recovered with external magnetic field after treating mercury, Hg(II) in aqueous solution. 96\% of Hg(II) was removed in 4h under sunlight, at pH 11 and 16\% (v/v) of photocatalyst dosage. FESEM results revealed that the beads possessed significant superporosity…	Polyvinyl alcohol-alginate ferrophoto gels for mercury(II) removal	Photo catalysts; gamma-Fe2O3 beads; Hg(II); PVA-alginate; Wastewater; treatment	none	UNIV TEKNOL MALAYSIA;UNIV TEKNOL MALAYSIA;UNIV TEKNOL MALAYSIA	UNIV TEKNOL MALAYSIA		RAHMAN A, 2016, J IND ENG CHEM	RAHMAN A, 2016, J IND ENG CHEM	STE 800, 230 PARK AVE, NEW YORK, NY 10169 USA	UNIVERSITI TEKNOLOGI MALAYSIA; UNIVERSITI TEKNOLOGI MALAYSIA		ANI@CHEME.UTM.MY		2025-11-07	CZ4ZG	1876-794X			UNIVERSITI TEKNOLOGI MALAYSIA [06H40]	FINANCIAL SUPPORT FROM UNIVERSITI TEKNOLOGI MALAYSIA (RESEARCH UNIVERSITY GRANT 06H40) FOR THIS RESEARCH IS GRATEFULLY ACKNOWLEDGED.	JAN 23
VIJAYAKUMAR G;WIJAYARATNE K;PERERA ;CHAMANEI S C	ADSORPTION; MERCURY POLLUTION; SOL-GEL; SPHERICAL ROD-LIKE; WATER; TREATMENT; HEAVY-METAL ION; MAGNESIUM-OXIDE; AQUEOUS-SOLUTIONS; EFFICIENT REMOVAL; MGO NANOPARTICLES; NANOCOMPOSITES; CARBON; HG(II); PERFORMANCE	ADSORPTION; MERCURY POLLUTION; SOL-GEL; SPHERICAL ROD-LIKE; WATER; TREATMENT	HEAVY-METAL ION; MAGNESIUM-OXIDE; AQUEOUS-SOLUTIONS; EFFICIENT REMOVAL; MGO NANOPARTICLES; ADSORPTION; NANOCOMPOSITES; CARBON; HG(II); PERFORMANCE	VIJAYAKUMAR, G (CORRESPONDING AUTHOR), UNIV PERADENIYA, POSTGRAD INST SCI, PERADENIYA, SRI LANKA.; VIJAYAKUMAR, GURUNANTHANAN; WIJAYARATNE, KAPILA BANDARA; PERERA, CHAMANEI SANDAMALI, UNIV PERADENIYA, POSTGRAD INST SCI, PERADENIYA, SRI LANKA.; PERERA, CHAMANEI SANDAMALI, KHALIFA UNIV, DEPT PHYS, ABU DHABI 12788, U ARAB EMIRATES.	WATER AIR SOIL POLLUT.	MERCURY (HG) CONTAMINATION IN WATER SOURCES IS A CRITICAL ENVIRONMENTAL AND PUBLIC HEALTH CONCERN, ARISING FROM INDUSTRIAL ACTIVITIES, MINING, AND IMPROPER WASTE DISPOSAL. THIS STUDY INVESTIGATES THE REMOVAL OF HG(II) IONS USING FE3O4/MGO NANOCOMPOSITE, A SOL-GEL-SYNTHESIZED ADSORBENT. STRUCTURAL ANALYSIS THROUGH X-RAY DIFFRACTION (XRD) CONFIRMED THE SUCCESSFUL FORMATION OF CUBIC FE3O4 AND MGO PH…		VIJAYAKUMAR, G (CORRESPONDING AUTHOR), UNIV PERADENIYA, POSTGRAD INST SCI, PERADENIYA, SRI LANKA	10.1007/s11270-025-08088-7		0049-6979	WATER AIR AND SOIL POLLUTION	ENGLISH	2	7				SPRINGER INT PUBL AG	ISI	ENHANCED MERCURY REMOVAL FROM WATER USING FE3O4/MGO COMPOSITE ADSORBENT	ARTICLE		236	2025	VIJAYAKUMAR GURUNANTHANAN;WIJAYARATNE KAPILA BANDARA;PERERA; CHAMANEI SANDAMALI	WATER AIR SOIL POLLUT	Mercury (Hg) contamination in water sources is a critical environmental and public health concern, arising from industrial activities, mining, and improper waste disposal. This study investigates the removal of Hg(II) ions using Fe3O4/MgO nanocomposite, a sol-gel-synthesized adsorbent. Structural analysis through X-ray Diffraction (XRD) confirmed the successful formation of cubic Fe3O4 and MgO ph…	Enhanced Mercury Removal from Water Using Fe3O4/MgO Composite Adsorbent	Adsorption; Mercury pollution; Sol-gel; Spherical rod-like; Water; treatment	none	UNIV PERADENIYA;UNIV PERADENIYA;KHALIFA UNIV	UNIV PERADENIYA		VIJAYAKUMAR G, 2025, WATER AIR SOIL POLLUT	VIJAYAKUMAR G, 2025, WATER AIR SOIL POLLUT	GEWERBESTRASSE 11, CHAM, CH-6330, SWITZERLAND	UNIVERSITY OF PERADENIYA; KHALIFA UNIVERSITY OF SCIENCE \& TECHNOLOGY	444	GURUNANTHANANV@SCI.PDN.AC.LK		2025-11-07	2PN8Q	1573-2932			SCIENCE BATCH OF 1976-1980 OF THE UNIVERSITY OF PERADENIYA, SRI LANKA	WE WOULD LIKE TO EXTEND OUR SINCERE GRATITUDE TO DR. BUDDHIKA S. DASSANAYAKE, OUR LATE SENIOR LECTURER, FOR HIS INVALUABLE GUIDANCE, SUPPORT, AND EXPERTISE IN THE PUBLICATION OF THIS JOURNAL ARTICLE. DR. BUDDHIKA'S CONTRIBUTIONS WERE INSTRUMENTAL IN SHAPING THE RESEARCH AND ENHANCING THE QUALITY OF THIS WORK. HIS DEDICATION AND MENTORSHIP HAVE LEFT A LASTING IMPACT ON ALL OF US. WE DEEPLY APPRECI…	JUL
LIANG X;GE Y;WU Z;QIN W	MERCURY; METHYLMERCURY; REMOVAL; DNA; DENDRIMER; MAGNETIC SILICA; NANOPARTICLES; HEAVY-METAL IONS; POLY(AMIDOAMINE) DENDRIMERS; ADSORPTION PROPERTIES; AQUEOUS-SOLUTIONS; ONE-STEP; COMPLEXES; WATER; MICROSPHERES; ADSORBENTS; BINDING	MERCURY; METHYLMERCURY; REMOVAL; DNA; DENDRIMER; MAGNETIC SILICA; NANOPARTICLES	HEAVY-METAL IONS; POLY(AMIDOAMINE) DENDRIMERS; ADSORPTION PROPERTIES; AQUEOUS-SOLUTIONS; ONE-STEP; COMPLEXES; WATER; MICROSPHERES; ADSORBENTS; BINDING	QIN, WD (CORRESPONDING AUTHOR), BEIJING NORMAL UNIV, MINIST EDUC, COLL CHEM, KEY LAB THEORET \& COMPUTAT PHOTOCHEM, BEIJING 100875, PEOPLES R CHINA.; LIANG, XIAO; GE, YING; QIN, WEIDONG, BEIJING NORMAL UNIV, MINIST EDUC, COLL CHEM, KEY LAB THEORET \& COMPUTAT PHOTOCHEM, BEIJING 100875, PEOPLES R CHINA.; WU, ZHENGLONG, BEIJING NORMAL UNIV, ANALYT \& TESTING CTR, BEIJING 100875, PEOPLES R CHINA.	J. CHEM. TECHNOL. BIOTECHNOL.	BACKGROUND: HG(II) AND MEHG(I) ARE TOXIC POLLUTANTS CAUSING WIDE CONCERNS. POLYAMIDOAMINE-GRAFTED MAGNETIC SILICA NANOPARTICLES (FE3O4-SIO2-PAMAMS) WERE SYNTHESIZED AS BEADS, ON WHICH HERRING SPERM DNA FRAGMENTS WERE IMMOBILIZED AS REACTING MOIETIES FOR REMOVAL OF HG(II) AND MEHG(I) FROM WATER MATRICES. THE FACTORS INFLUENCING THE REMOVAL, SUCH AS DNA FRAGMENTS, GENERATION OF THE POLYAMIDOAMINE S…		QIN, WD (CORRESPONDING AUTHOR), BEIJING NORMAL UNIV, MINIST EDUC, COLL CHEM, KEY LAB THEORET \& COMPUTAT PHOTOCHEM, BEIJING 100875, PEOPLES R CHINA	10.1002/jctb.5065		0268-2575	JOURNAL OF CHEMICAL TECHNOLOGY AND BIOTECHNOLOGY	ENGLISH	10	4	819-826			WILEY	ISI	DNA FRAGMENTS ASSEMBLED ON POLYAMIDOAMINE-GRAFTED CORE-SHELL MAGNETIC SILICA NANOPARTICLES FOR REMOVAL OF MERCURY( II) AND METHYLMERCURY( I)	ARTICLE		92	2017	LIANG XIAO;GE YING;WU ZHENGLONG;QIN WEIDONG	J CHEM TECHNOL BIOTECHNOL	BACKGROUND: Hg(II) and MeHg(I) are toxic pollutants causing wide concerns. Polyamidoamine-grafted magnetic silica nanoparticles (Fe3O4-SiO2-PAMAMs) were synthesized as beads, on which herring sperm DNA fragments were immobilized as reacting moieties for removal of Hg(II) and MeHg(I) from water matrices. The factors influencing the removal, such as DNA fragments, generation of the polyamidoamine s…	DNA fragments assembled on polyamidoamine-grafted core-shell magnetic silica nanoparticles for removal of mercury( II) and methylmercury( I)	mercury; methylmercury; removal; DNA; dendrimer; magnetic silica; nanoparticles	none	BEIJING NORMAL UNIV;BEIJING NORMAL UNIV;BEIJING NORMAL UNIV	BEIJING NORMAL UNIV		LIANG X, 2017, J CHEM TECHNOL BIOTECHNOL	LIANG X, 2017, J CHEM TECHNOL BIOTECHNOL	111 RIVER ST, HOBOKEN 07030-5774, NJ USA	BEIJING NORMAL UNIVERSITY; BEIJING NORMAL UNIVERSITY		QINWD@BNU.EDU.CN		2025-11-07	EP5FJ	1097-4660			NATIONAL NATURAL SCIENCE FOUNDATION OF CHINA [20975014, 21575017]; FUNDAMENTAL RESEARCH FUNDS FOR THE CENTRAL UNIVERSITIES	THIS WORK WAS SUPPORTED BY THE NATIONAL NATURAL SCIENCE FOUNDATION OF CHINA (20975014, 21575017) AND THE FUNDAMENTAL RESEARCH FUNDS FOR THE CENTRAL UNIVERSITIES.	APR
BRUNET F;TISSERAND D;LANSON M;MALVOISIN B;BERTRAND M;BONNAUD C	CV-AAS; HG REDUCTION KINETICS; HG REMOVAL; STEEL-INDUSTRY WASTES; ZVI; ZERO-VALENT IRON; GROUNDWATER REMEDIATION; MERCURY; WATER; REMOVAL; OXIDE; ADSORPTION; DESORPTION; PARTICLES; KINETICS	CV-AAS; HG REDUCTION KINETICS; HG REMOVAL; STEEL-INDUSTRY WASTES; ZVI	ZERO-VALENT IRON; GROUNDWATER REMEDIATION; MERCURY; WATER; REMOVAL; OXIDE; ADSORPTION; DESORPTION; PARTICLES; KINETICS	BRUNET, F (CORRESPONDING AUTHOR), UNIV GUSTAVE EIFFEL, CNRS, IRD, UNIV SAVOIE MT BLANC,UNIV GRENOBLE ALPES,ISTERRE, F-38000 GRENOBLE, FRANCE.; BRUNET, FABRICE; TISSERAND, DELPHINE; LANSON, MARTINE; MALVOISIN, BENJAMIN, UNIV GUSTAVE EIFFEL, CNRS, IRD, UNIV SAVOIE MT BLANC,UNIV GRENOBLE ALPES,ISTERRE, F-38000 GRENOBLE, FRANCE.; BERTRAND, MATHIEU; BONNAUD, CELINE, HYMAG IN, F-38000 GRENOBLE, FRANCE.	WATER SCI. TECHNOL.	AN IRON-BASED POWDER MATERIAL COMPOSED OF ZEROVALENT IRON (8 WT.\%) AND MAGNETITE (92 WT.\%), HAS BEEN SYNTHESIZED HYDROTHERMALLY AT 200 DEGREES C FROM ZERO-VALENT IRON. ITS EFFECT ON THE REDUCTION OF AQUEOUS HG2+ INTO GASEOUS HG-0 HAS BEEN INVESTIGATED AT AMBIENT CONDITIONS FOR PH COMPRISED BETWEEN 4 AND 8.5. THE PRODUCTION OF HG-0 WAS MONITORED WITH AN ONLINE MERCURY VAPOR ANALYZER AT THE PICOG…		BRUNET, F (CORRESPONDING AUTHOR), UNIV GUSTAVE EIFFEL, CNRS, IRD, UNIV SAVOIE MT BLANC,UNIV GRENOBLE ALPES,ISTERRE, F-38000 GRENOBLE, FRANCE	10.2166/wst.2022.210		0273-1223	WATER SCIENCE AND TECHNOLOGY	ENGLISH	1	3	596-609			IWA PUBLISHING	ISI	REAL-TIME MONITORING OF AQUEOUS HG2+ REDUCTION DYNAMICS BY MAGNETITE/IRON METAL COMPOSITE POWDERS SYNTHESIZED HYDROTHERMALLY	ARTICLE		86	2022	BRUNET FABRICE;TISSERAND DELPHINE;LANSON MARTINE; MALVOISIN BENJAMIN;BERTRAND MATHIEU;BONNAUD CELINE	WATER SCI TECHNOL	An iron-based powder material composed of zerovalent iron (8 wt.\%) and magnetite (92 wt.\%), has been synthesized hydrothermally at 200 degrees C from zero-valent iron. Its effect on the reduction of aqueous Hg2+ into gaseous Hg-0 has been investigated at ambient conditions for pH comprised between 4 and 8.5. The production of Hg-0 was monitored with an online mercury vapor analyzer at the picog…	Real-time monitoring of aqueous Hg2+ reduction dynamics by magnetite/iron metal composite powders synthesized hydrothermally	CV-AAS; Hg reduction kinetics; Hg removal; steel-industry wastes; ZVI	none	UNIV GUSTAVE EIFFEL;UNIV GUSTAVE EIFFEL	UNIV GUSTAVE EIFFEL		BRUNET F, 2022, WATER SCI TECHNOL	BRUNET F, 2022, WATER SCI TECHNOL	REPUBLIC-EXPORT BLDG, UNITS 1 04 \& 1 05, 1 CLOVE CRESCENT, LONDON, ENGLAND	UNIVERSITE SAVOIE MONT BLANC; COMMUNAUTE UNIVERSITE GRENOBLE ALPES; UNIVERSITE GRENOBLE ALPES (UGA); CENTRE NATIONAL DE LA RECHERCHE SCIENTIFIQUE (CNRS); INSTITUT DE RECHERCHE POUR LE DEVELOPPEMENT (IRD); UNIVERSITE GUSTAVE-EIFFEL		FABRICE.BRUNET@UNIV-GRENOBLE-ALPES.FR		2025-11-07	3S5JR	1996-9732					AUG 1
LI M;SHANG H;LI H;HONG Y;LING C;WEI K;ZHOU B;MAO C;AI Z;ZHANG L	ENVIRONMENTAL CONTROL; HEAVY METAL REMOVAL; KIRKENDALL EFFECT; NANOSCALE; ZEROVALENT IRON; PHOSPHORYLATION; ZERO-VALENT IRON; GALVANIC REPLACEMENT; HOLLOW NANOCRYSTALS; PARTICLE-SIZE; NANOPARTICLES; REMOVAL; GROWTH; SUPERSATURATION; STRESS; ROUTE	ENVIRONMENTAL CONTROL; HEAVY METAL REMOVAL; KIRKENDALL EFFECT; NANOSCALE; ZEROVALENT IRON; PHOSPHORYLATION	ZERO-VALENT IRON; GALVANIC REPLACEMENT; HOLLOW NANOCRYSTALS; PARTICLE-SIZE; NANOPARTICLES; REMOVAL; GROWTH; SUPERSATURATION; STRESS; ROUTE	LI, H; AI, ZH; ZHANG, LZ (CORRESPONDING AUTHOR), CENT CHINA NORMAL UNIV, KEY LAB PESTICIDE \& CHEM BIOL, MINIST EDUC, INST APPL \& ENVIRONM CHEM,COLL CHEM, WUHAN 430079, PEOPLES R CHINA.; LI, MEIQI; SHANG, HUAN; LI, HAO; HONG, YANFENG; LING, CANCAN; WEI, KAI; ZHOU, BIAO; MAO, CHENGLIANG; AI, ZHIHUI; ZHANG, LIZHI, CENT CHINA NORMAL UNIV, KEY LAB PESTICIDE \& CHEM BIOL, MINIST EDUC, INST APPL \& EN…	ANGEW. CHEM.-INT. EDIT.	REMOVAL OF NON-BIODEGRADABLE HEAVY METALS HAS BEEN THE TOP PRIORITY IN WASTEWATER TREATMENT AND THE DEVELOPMENT OF GREEN TECHNOLOGIES REMAINS A SIGNIFICANT CHALLENGE. WE DEMONSTRATE THAT PHOSPHORYLATED NANOSCALE ZERO-VALENT IRON (NZVI) IS PROMISING FOR REMOVAL OF HEAVY METALS (NI-II, CU-II, CR-VI, HG-II) VIA A BOOSTED KIRKENDALL EFFECT. PHOSPHORYLATION CONFINES TENSILE HOOP STRESS ON THE NZVI PAR…		LI, H; AI, ZH; ZHANG, LZ (CORRESPONDING AUTHOR), CENT CHINA NORMAL UNIV, KEY LAB PESTICIDE \& CHEM BIOL, MINIST EDUC, INST APPL \& ENVIRONM CHEM,COLL CHEM, WUHAN 430079, PEOPLES R CHINA	10.1002/anie.202104586			ANGEWANDTE CHEMIE-INTERNATIONAL EDITION	ENGLISH	173	31	17115-17122			WILEY-V C H VERLAG GMBH	ISI	KIRKENDALL EFFECT BOOSTS PHOSPHORYLATED NZVI FOR EFFICIENT HEAVY METAL WASTEWATER TREATMENT	ARTICLE		60	2021	LI MEIQI;SHANG HUAN;LI HAO;HONG YANFENG;LING CANCAN;WEI KAI;ZHOU BIAO;MAO CHENGLIANG;AI ZHIHUI; ZHANG LIZHI	ANGEW CHEM-INT EDIT	Removal of non-biodegradable heavy metals has been the top priority in wastewater treatment and the development of green technologies remains a significant challenge. We demonstrate that phosphorylated nanoscale zero-valent iron (nZVI) is promising for removal of heavy metals (Ni-II, Cu-II, Cr-VI, Hg-II) via a boosted Kirkendall effect. Phosphorylation confines tensile hoop stress on the nZVI par…	Kirkendall Effect Boosts Phosphorylated nZVI for Efficient Heavy Metal Wastewater Treatment	environmental control; heavy metal removal; Kirkendall effect; nanoscale; zerovalent iron; phosphorylation	none	CENT CHINA NORMAL UNIV;CENT CHINA NORMAL UNIV	NOTREPORTED;NOTREPORTED;CENT CHINA NORMAL UNIV		LI M, 2021, ANGEW CHEM-INT EDIT	LI M, 2021, ANGEW CHEM-INT EDIT	POSTFACH 101161, 69451 WEINHEIM, GERMANY	CENTRAL CHINA NORMAL UNIVERSITY		BACKAMI@126.COM JENNIFER.AI@MAIL.CCNU.EDU.CN ZHANGLZ@MAIL.CCNU.EDU.CN		2025-11-07	TK6ZH	1521-3773	JUN 2021		NATIONAL KEY RESEARCH AND DEVELOPMENT PROGRAM OF CHINA [2016YFA0203000, 2019YFC1806203, 2018YFC1800801, 2018YFC1802003]; NATIONAL NATURAL SCIENCE FOUNDATION OF CHINA [U20A20129, 21876058, 21872061, 21936003]; CENTRAL UNIVERSITY BASIC SCIENTIFIC RESEARCH FOUNDATION [2020YBZZ018]; 111 PROJECT [B17019]	THIS WORK WAS SUPPORTED BY THE NATIONAL KEY RESEARCH AND DEVELOPMENT PROGRAM OF CHINA (2016YFA0203000, 2019YFC1806203, 2018YFC1800801, AND 2018YFC1802003), NATIONAL NATURAL SCIENCE FOUNDATION OF CHINA (U20A20129, 21876058, 21872061, AND 21936003), THE CENTRAL UNIVERSITY BASIC SCIENTIFIC RESEARCH FOUNDATION (DOCTORAL TRAINING PROGRAM) 2020YBZZ018 AND 111 PROJECT (B17019). WE ALSO THANK BEIJING SYN…	JUL 26
GINDABA G;DEMSASH H	MERCURY; ADSORPTION; MAGNETITE NANOPARTICLES; AQUEOUS SOLUTION; RESPONSE; SURFACE METHODOLOGY; CENTRAL COMPOSITE DESIGN; OPTIMIZATION; RESPONSE-SURFACE METHODOLOGY; FE3O4 NANOPARTICLES; EFFICIENT REMOVAL; HG(II); WATER; IONS; PERFORMANCE; ADSORBENT; CARBON	MERCURY; ADSORPTION; MAGNETITE NANOPARTICLES; AQUEOUS SOLUTION; RESPONSE; SURFACE METHODOLOGY; CENTRAL COMPOSITE DESIGN; OPTIMIZATION	RESPONSE-SURFACE METHODOLOGY; FE3O4 NANOPARTICLES; EFFICIENT REMOVAL; ADSORPTION; HG(II); WATER; IONS; PERFORMANCE; ADSORBENT; CARBON	GINDABA, GT (CORRESPONDING AUTHOR), HARAMAYA UNIV, INST TECHNOL, DEPT CHEM ENGN, POB 138, DIRE DAWA, ETHIOPIA.; GINDABA, GADISSA TOKUMA, HARAMAYA UNIV, INST TECHNOL, DEPT CHEM ENGN, POB 138, DIRE DAWA, ETHIOPIA.; DEMSASH, HUNDESSA DESSALEGN, ADDIS ABABA UNIV, INST TECHNOL, SCH CHEM \& BIOENGN, KING GEORGE VI ST,POB 385, ADDIS ABABA, ETHIOPIA.	BIOMASS CONVERS. BIOREFINERY	THE PRESENT STUDY MAINLY FOCUSES ON THE STATISTICAL ANALYSIS AND OPTIMIZATION OF HG(II) REMOVAL FROM AQUEOUS SOLUTION BY WHEAT STRAW-SUPPORTED MAGNETITE NANOPARTICLES (FE3O4-WSS NPS). A RESPONSE SURFACE METHODOLOGY WITH THE CENTRAL COMPOSITE DESIGN WAS USED TO OPTIMIZE THE ADSORPTION OF HG(II) AND ADSORPTION PARAMETERS. FOLLOWING A CENTRAL COMPOSITE DESIGN (CCD) MODEL, THE RESULT OF THE ANALYSIS …		GINDABA, GT (CORRESPONDING AUTHOR), HARAMAYA UNIV, INST TECHNOL, DEPT CHEM ENGN, POB 138, DIRE DAWA, ETHIOPIA	10.1007/s13399-024-05610-5		2190-6815	BIOMASS CONVERSION AND BIOREFINERY	ENGLISH	2	3	4657-4676			SPRINGER HEIDELBERG	ISI	STATISTICAL ANALYSIS AND OPTIMIZATION OF MERCURY REMOVAL FROM AQUEOUS SOLUTION ONTO GREEN SYNTHESIZED MAGNETITE NANOPARTICLE USING CENTRAL COMPOSITE DESIGN	ARTICLE		15	2025	GINDABA GADISSA TOKUMA;DEMSASH HUNDESSA DESSALEGN	BIOMASS CONVERS BIOREFINERY	The present study mainly focuses on the statistical analysis and optimization of Hg(II) removal from aqueous solution by wheat straw-supported magnetite nanoparticles (Fe3O4-WSS NPs). A response surface methodology with the central composite design was used to optimize the adsorption of Hg(II) and adsorption parameters. Following a central composite design (CCD) model, the result of the analysis …	Statistical analysis and optimization of mercury removal from aqueous solution onto green synthesized magnetite nanoparticle using central composite design	Mercury; Adsorption; Magnetite nanoparticles; Aqueous solution; Response; surface methodology; Central composite design; Optimization	none	HARAMAYA UNIV;HARAMAYA UNIV;ADDIS ABABA UNIV	HARAMAYA UNIV		GINDABA G, 2025, BIOMASS CONVERS BIOREFINERY	GINDABA G, 2025, BIOMASS CONVERS BIOREFINERY	TIERGARTENSTRASSE 17, D-69121 HEIDELBERG, GERMANY	HARAMAYA UNIVERSITY; ADDIS ABABA UNIVERSITY		GADISSATOKUMA@GMAIL.COM		2025-11-07	W0W7U	2190-6823	APR 2024		JIMMA UNIVERSITY	THE ADMINISTRATORS OF JIMMA INSTITUTE OF TECHNOLOGY, JIMMA UNIVERSITY, ARE GRATEFULLY ACKNOWLEDGED BY THE AUTHORS FOR PROVIDING THE FUNDING AND LAB RESOURCES NECESSARY TO COMPLETE THE WORK EFFECTIVELY. THERE WAS NO EXTERNAL FUNDING UTILIZED.	FEB
GIL-DIAZ M;RODRIGUEZ-ALONSO J;MAFFIOTTE C;BARAGANO ;D. D;MILLAN R;LOBO M	HG; NZVI; NFES; NANOREMEDIATION; NFE(3)O(4); ZERO-VALENT IRON; SOLID-PHASE EXTRACTION; WASTE-WATER; MAGNETIC; NANOPARTICLES; HEAVY-METALS; AGING TIME; FES; REMEDIATION; COMPOSITE	HG; NZVI; NFES; NANOREMEDIATION; NFE(3)O(4)	ZERO-VALENT IRON; SOLID-PHASE EXTRACTION; WASTE-WATER; MAGNETIC; NANOPARTICLES; HEAVY-METALS; AGING TIME; NZVI; FES; REMEDIATION; COMPOSITE	GIL-DÍAZ, M (CORRESPONDING AUTHOR), IMIDRA INST MADRILENO INVEST \& DESARROLLO RURAL A, FINCA EL ENCIN,ALCALA DE HENARES, MADRID 28805, SPAIN.; GIL-DIAZ, M.; LOBO, M. C., IMIDRA INST MADRILENO INVEST \& DESARROLLO RURAL A, FINCA EL ENCIN,ALCALA DE HENARES, MADRID 28805, SPAIN.; RODRIGUEZ-ALONSO, J.; MILLAN, R., CIEMAT, DEPT ENVIRONM, AVE COMPLUTENSE 40, MADRID 28040, SPAIN.; MAFFIOTTE, C. A., CIE…	J. CLEAN PROD.	IRON NANOPARTICLES HAVE BEEN SUCCESSFULLY USED TO REMOVE METALS FROM CONTAMINATED WATER. HOWEVER, MOST RESEARCH IN THIS FIELD HAS BEEN PERFORMED WITH NANOPARTICLES SYNTHESIZED AT THE LAB-SCALE. THIS STUDY COMPARES THE CAPACITY OF THREE TYPES OF COMMERCIAL IRON NANOPARTICLES, NANOSCALE ZERO-VALENT IRON (NZVI), NANO-MAGNETITE (NFE(3)O(4)) AND IRON SULFIDE (NFES) NANOPARTICLES TO REMOVE HG2+ FROM AR…		GIL-DÍAZ, M (CORRESPONDING AUTHOR), IMIDRA INST MADRILENO INVEST \& DESARROLLO RURAL A, FINCA EL ENCIN,ALCALA DE HENARES, MADRID 28805, SPAIN	10.1016/j.jclepro.2021.128272		0959-6526	JOURNAL OF CLEANER PRODUCTION	ENGLISH	23					ELSEVIER SCI LTD	ISI	IRON NANOPARTICLES ARE EFFICIENT AT REMOVING MERCURY FROM POLLUTED WATERS	ARTICLE		315	2021	GIL-DIAZ M;RODRIGUEZ-ALONSO J;MAFFIOTTE C A;BARAGANO; D;MILLAN R;LOBO M C	J CLEAN PROD	Iron nanoparticles have been successfully used to remove metals from contaminated water. However, most research in this field has been performed with nanoparticles synthesized at the lab-scale. This study compares the capacity of three types of commercial iron nanoparticles, nanoscale zero-valent iron (nZVI), nano-magnetite (nFe(3)O(4)) and iron sulfide (nFeS) nanoparticles to remove Hg2+ from ar…	Iron nanoparticles are efficient at removing mercury from polluted waters	Hg; nZVI; nFeS; Nanoremediation; nFe(3)O(4)	none	IMIDRA INST MADRILENO INVEST AND DESARROLLO RURAL A;IMIDRA INST MADRILENO INVEST AND DESARROLLO RURAL A;DEPT ENVIRONM;DEPT TECHNOL;UNIV OVIEDO	IMIDRA INST MADRILENO INVEST AND DESARROLLO RURAL A		GIL-DIAZ M, 2021, J CLEAN PROD	GIL-DIAZ M, 2021, J CLEAN PROD	THE BOULEVARD, LANGFORD LANE, KIDLINGTON, OXFORD OX5 1GB, OXON, ENGLAND	CENTRO DE INVESTIGACIONES ENERGETICAS, MEDIOAMBIENTALES TECNOLOGICAS; CENTRO DE INVESTIGACIONES ENERGETICAS, MEDIOAMBIENTALES TECNOLOGICAS; UNIVERSITY OF OVIEDO	128272	MAR.GIL.DIAZ@MADRID.ORG		2025-11-07	UF5AC	1879-1786	JUL 2021		AEI/ERDF, EU [CTM 2016-78222-C2]	THIS WORK WAS SUPPORTED BY THE RESEARCH PROJECT REHABILITA CTM 2016-78222-C2 (AEI/ERDF, EU) . WE WOULD ALSO LIKE TO THANK THE ELECTRON MICROSCOPY UNIT OF THE UNIVERSITY OF OVIEDO FOR TECHNICAL SUPPORT.	SEP 15
SAFARI N;GHANEMI K;BUAZAR F	MAGNETIC-SELENIUM NANOCOMPOSITE; HG (II) REMOVAL; ADSORPTION; AQUEOUS; SAMPLE; THERMODYNAMIC \& KINETIC MODELS; GRAPHENE OXIDE/FE-MN; HEAVY-METAL IONS; AQUEOUS-SOLUTION; HG(II); REMOVAL; METHYLMERCURY; NANOPARTICLES; TOXICITY; CD(II); CARBON	MAGNETIC-SELENIUM NANOCOMPOSITE; HG (II) REMOVAL; ADSORPTION; AQUEOUS; SAMPLE; THERMODYNAMIC \& KINETIC MODELS	GRAPHENE OXIDE/FE-MN; HEAVY-METAL IONS; AQUEOUS-SOLUTION; HG(II); REMOVAL; METHYLMERCURY; NANOPARTICLES; ADSORPTION; TOXICITY; CD(II); CARBON	GHANEMI, K (CORRESPONDING AUTHOR), KHORRAMSHAHR UNIV MARINE SCI \& TECHNOL, FAC MARINE SCI, DEPT MARINE CHEM, POB 669, KHORRAMSHAHR, IRAN.; SAFARI, NIMA; GHANEMI, KAMAL; BUAZAR, FOAD, KHORRAMSHAHR UNIV MARINE SCI \& TECHNOL, FAC MARINE SCI, DEPT MARINE CHEM, POB 669, KHORRAMSHAHR, IRAN.	J. ENVIRON. MANAGE.	A NOVEL CORE-SHELL MAGNETIC-SELENIUM NANOCOMPOSITE (FE3O4@SIO2@SE) WAS SYNTHESIZED FOR FAST AND EFFECTIVE REMOVAL OF HG (II) IONS FROM VARIOUS INDUSTRIAL AND ENVIRONMENTAL WATER SAMPLES. THE COMPOSITION, PROPERTY, AND STRUCTURE OF FE3O4@SIO2@SE WERE CHARACTERIZED BY SPECTRAL AND MICROSCOPIC TECHNIQUES. THE KEY PARAMETERS AFFECTING THE REMOVAL WERE EVALUATED AND OPTIMIZED. THE CONCENTRATION OF RES…		GHANEMI, K (CORRESPONDING AUTHOR), KHORRAMSHAHR UNIV MARINE SCI \& TECHNOL, FAC MARINE SCI, DEPT MARINE CHEM, POB 669, KHORRAMSHAHR, IRAN	10.1016/j.jenvman.2020.111263		0301-4797	JOURNAL OF ENVIRONMENTAL MANAGEMENT	ENGLISH	35					ACADEMIC PRESS LTD- ELSEVIER SCIENCE LTD	ISI	SELENIUM FUNCTIONALIZED MAGNETIC NANOCOMPOSITE AS AN EFFECTIVE MERCURY (II) ION SCAVENGER FROM ENVIRONMENTAL WATER AND INDUSTRIAL WASTEWATER SAMPLES	ARTICLE		276	2020	SAFARI NIMA;GHANEMI KAMAL;BUAZAR FOAD	J ENVIRON MANAGE	A novel core-shell magnetic-selenium nanocomposite (Fe3O4@SiO2@Se) was synthesized for fast and effective removal of Hg (II) ions from various industrial and environmental water samples. The composition, property, and structure of Fe3O4@SiO2@Se were characterized by spectral and microscopic techniques. The key parameters affecting the removal were evaluated and optimized. The concentration of res…	Selenium functionalized magnetic nanocomposite as an effective mercury (II) ion scavenger from environmental water and industrial wastewater samples	Magnetic-selenium nanocomposite; Hg (II) removal; Adsorption; Aqueous; sample; Thermodynamic \& kinetic models	none	KHORRAMSHAHR UNIV MARINE SCI AND TECHNOL;KHORRAMSHAHR UNIV MARINE SCI AND TECHNOL	KHORRAMSHAHR UNIV MARINE SCI AND TECHNOL		SAFARI N, 2020, J ENVIRON MANAGE	SAFARI N, 2020, J ENVIRON MANAGE	24-28 OVAL RD, LONDON NW1 7DX, ENGLAND	KHORRAMSHAHR UNIVERSITY OF MARINE SCIENCE \& TECHNOLOGY	111263	KAMALGHANEMI@GMAIL.COM		2025-11-07	OY0VK	1095-8630			KHORRAMSHAHR UNIVERSITY OF MARINE SCIENCE AND TECHNOLOGY	THE FINANCIAL AND TECHNICAL SUPPORT PROVIDED BY KHORRAMSHAHR UNIVERSITY OF MARINE SCIENCE AND TECHNOLOGY THROUGH A GRANT (2018) TO CONDUCT THIS STUDY IS GRATEFULLY ACKNOWLEDGED.	DEC 15
MAIA L;HOTT R;LADEIRA P;BATISTA B;ANDRADE T;SANTOS M;FARIA M;OLIVEIRA L;MONTEIRO D;PEREIRA M;RODRIGUES J	MERCURY; FEOOH; CYSTEINE; ADSORPTION; FILTERS; IRON-OXIDE NANOPARTICLES; AQUEOUS-SOLUTIONS; MERCURY REMOVAL; L-CYSTEINE; FE3O4 NANOPARTICLES; ACTIVATED CARBON; MESOPOROUS SILICA; ADSORBENT; FE3O4-AT-SIO2	MERCURY; FEOOH; CYSTEINE; ADSORPTION; FILTERS	IRON-OXIDE NANOPARTICLES; AQUEOUS-SOLUTIONS; MERCURY REMOVAL; L-CYSTEINE; FE3O4 NANOPARTICLES; ACTIVATED CARBON; MESOPOROUS SILICA; ADSORPTION; ADSORBENT; FE3O4-AT-SIO2	RODRIGUES, JL (CORRESPONDING AUTHOR), UNIV FED VALES JEQUITINHONHA \& MUCURI, INST CIENCIA ENGN \& TECNOL, BR-39803371 TEOFILO OTONI, MG, BRAZIL.; MAIA, LUIZ F. O.; HOTT, RODRIGO C.; ANDRADE, THAINA G.; SANTOS, MAYRA S.; FARIA, MARCIA C. S.; MONTEIRO, DOUGLAS S.; PEREIRA, MARCIO C.; RODRIGUES, JAIRO LISBOA, UNIV FED VALES JEQUITINHONHA \& MUCURI, INST CIENCIA ENGN \& TECNOL, BR-39803371 TEOFILO O…	CHEMOSPHERE	L-CYSTINE FUNCTIONALIZED DELTA-FEOOH NANOPARTICLES (CYS-DELTA-FEOOH) WERE PREPARED BY A CHEAP AND STRAIGHTFORWARD METHOD FOR USING AS AN ADSORBENT OF HG(II) IN AQUEOUS SOLUTION. X-RAY DIFFRACTION (XRD), ATTENUATED TOTAL REFLECTANCE INFRARED SPECTROSCOPY (ATR-IR), AND RAMAN SPECTROSCOPY CONFIRMED THAT CYS-DELTA-FEOOH WAS SUCCESSFULLY SYNTHESIZED. CYS-DELTA-FEOOH WITH 14 NM CRYSTAL SIZE, 34 M(2) G(…		RODRIGUES, JL (CORRESPONDING AUTHOR), UNIV FED VALES JEQUITINHONHA \& MUCURI, INST CIENCIA ENGN \& TECNOL, BR-39803371 TEOFILO OTONI, MG, BRAZIL	10.1016/j.chemosphere.2018.10.072		0045-6535	CHEMOSPHERE	ENGLISH	66		422-431			PERGAMON-ELSEVIER SCIENCE LTD	ISI	SIMPLE SYNTHESIS AND CHARACTERIZATION OF L-CYSTINE FUNCTIONALIZED Δ-FEOOH FOR HIGHLY EFFICIENT HG(II) REMOVAL FROM CONTAMINED WATER AND MINING WASTE	ARTICLE		215	2019	MAIA LUIZ F O;HOTT RODRIGO C;LADEIRA PATRICIA C C; BATISTA BRUNO LEMOS;ANDRADE THAINA G;SANTOS MAYRA S; FARIA MARCIA C S;OLIVEIRA LUIZ C A;MONTEIRO DOUGLAS S;PEREIRA MARCIO C;RODRIGUES JAIRO LISBOA	CHEMOSPHERE	L-Cystine functionalized delta-FeOOH nanoparticles (Cys-delta-FeOOH) were prepared by a cheap and straightforward method for using as an adsorbent of Hg(II) in aqueous solution. X-ray diffraction (XRD), attenuated total reflectance infrared spectroscopy (ATR-IR), and Raman spectroscopy confirmed that Cys-delta-FeOOH was successfully synthesized. Cys-delta-FeOOH with 14 nm crystal size, 34 m(2) g(…	Simple synthesis and characterization of L-Cystine functionalized δ-FeOOH for highly efficient Hg(II) removal from contamined water and mining waste	Mercury; FeOOH; Cysteine; Adsorption; Filters	none	UNIV FED VALES JEQUITINHONHA AND MUCURI;UNIV FED VALES JEQUITINHONHA AND MUCURI;UNIV FED ABC;UNIV FED MINAS GERAIS	UNIV FED VALES JEQUITINHONHA AND MUCURI		MAIA L, 2019, CHEMOSPHERE	MAIA L, 2019, CHEMOSPHERE	THE BOULEVARD, LANGFORD LANE, KIDLINGTON, OXFORD OX5 1GB, ENGLAND	UNIVERSIDADE FEDERAL DOS VALES DO JEQUITINHONHA E MUCURI (UFVJM); UNIVERSIDADE FEDERAL DO ABC (UFABC); UNIVERSIDADE FEDERAL DE MINAS GERAIS		JAIRO.RODRIGUES@UFVJM.EDU.BR		2025-11-07	HA6IO	1879-1298			CNPQ; FAPEMIG; REDE MINEIRA DE QUIMICA (RQ-MG); CAPES	THE AUTHORS ARE GRATEFUL TO CNPQ, FAPEMIG, REDE MINEIRA DE QUIMICA (RQ-MG), AND CAPES FOR THE FINANCIAL SUPPORT AND FELLOWSHIPS.	JAN
AMIRI M;ABEDI-KOUPAI J;ESLAMIAN S	BREAKTHROUGH TIME; DYNAMIC ADSORPTION; NANOSCALE ZEROVALENT IRON; OBA/NZVI; REDOX REACTION; AQUEOUS-SOLUTIONS; REMOVAL; WASTE; HYDROXYAPATITE; NANOPARTICLES; BIOSORPTION; KINETICS; CR(VI); BATCH; NZVI	BREAKTHROUGH TIME; DYNAMIC ADSORPTION; NANOSCALE ZEROVALENT IRON; OBA/NZVI; REDOX REACTION	AQUEOUS-SOLUTIONS; REMOVAL; WASTE; HYDROXYAPATITE; NANOPARTICLES; BIOSORPTION; KINETICS; CR(VI); BATCH; NZVI	AMIRI, MJ (CORRESPONDING AUTHOR), FASA UNIV, DEPT WATER ENGN, COLL AGR, FASA 7461781189, IRAN.; AMIRI, MOHAMMAD JAVAD, FASA UNIV, DEPT WATER ENGN, COLL AGR, FASA 7461781189, IRAN.; ABEDI-KOUPAI, JAHANGIR; ESLAMIAN, SAEID, ISFAHAN UNIV TECHNOL, COLL AGR, DEPT WATER ENGN, ESFAHAN 8415683111, IRAN.	WATER SCI. TECHNOL.	IN THIS RESEARCH, OSTRICH BONE ASH (OBA) WAS MODIFIED WITH NANOSCALE ZEROVALENT IRON (NZVI) PARTICLES AND APPLIED AS A NOVEL COMPOSITE ADSORBENT (OBA/NZVI) FOR DYNAMIC ADSORPTION/REDUCTION OF HG(II) AND PB(II) IONS IN A FIXED-BED COLUMN SYSTEM. ENTRAPMENT OF NZVI IN OBA BEADS BARRICADES THE PARTICLES FROM OXIDATION AND AGGREGATION. THE DYNAMIC BEHAVIOR OF METAL IONS REMOVAL BY OBA/NZVI WAS ASSESS…		AMIRI, MJ (CORRESPONDING AUTHOR), FASA UNIV, DEPT WATER ENGN, COLL AGR, FASA 7461781189, IRAN	10.2166/wst.2017.252		0273-1223	WATER SCIENCE AND TECHNOLOGY	ENGLISH	31	3	671-682			IWA PUBLISHING	ISI	ADSORPTION OF HG(II) AND PB(II) IONS BY NANOSCALE ZERO VALENT IRON SUPPORTED ON OSTRICH BONE ASH IN A FIXED-BED COLUMN SYSTEM	ARTICLE		76	2017	AMIRI MOHAMMAD JAVAD;ABEDI-KOUPAI JAHANGIR;ESLAMIAN SAEID	WATER SCI TECHNOL	In this research, ostrich bone ash (OBA) was modified with nanoscale zerovalent iron (nZVI) particles and applied as a novel composite adsorbent (OBA/nZVI) for dynamic adsorption/reduction of Hg(II) and Pb(II) ions in a fixed-bed column system. Entrapment of nZVI in OBA beads barricades the particles from oxidation and aggregation. The dynamic behavior of metal ions removal by OBA/nZVI was assess…	Adsorption of Hg(II) and Pb(II) ions by nanoscale zero valent iron supported on ostrich bone ash in a fixed-bed column system	breakthrough time; dynamic adsorption; nanoscale zerovalent iron; OBA/nZVI; redox reaction	none	FASA UNIV;FASA UNIV;ISFAHAN UNIV TECHNOL	FASA UNIV		AMIRI M, 2017, WATER SCI TECHNOL	AMIRI M, 2017, WATER SCI TECHNOL	ALLIANCE HOUSE, 12 CAXTON ST, LONDON SW1H0QS, ENGLAND	ISFAHAN UNIVERSITY OF TECHNOLOGY		MJ\_AMIRI@FASAU.AC.IR		2025-11-07	FC4EE	1996-9732			IRANIAN NANOTECHNOLOGY INITIATIVE COUNCIL	WE GREATLY APPRECIATE THE SUPPORT PROVIDED BY THE IRANIAN NANOTECHNOLOGY INITIATIVE COUNCIL.	JUL
INGLEZAKIS V;KURBANOVA A;MOLKENOVA A;ZORPAS A;ATABAEV T	NANOCOMPOSITES; MAGNETITE; SILVER; MERCURY; AMALGAMATION; HEAVY-METALS; HG(II); ADSORPTION; REDUCTION; NANOPARTICLES; REMEDIATION; PARTICLES; ADSORBENT	NANOCOMPOSITES; MAGNETITE; SILVER; MERCURY; AMALGAMATION	HEAVY-METALS; HG(II); ADSORPTION; REDUCTION; NANOPARTICLES; REMEDIATION; PARTICLES; ADSORBENT	ATABAEV, TS (CORRESPONDING AUTHOR), NAZARBAYEV UNIV, DEPT CHEM, NUR SULTAN 010000, KAZAKHSTAN.; ZORPAS, AA (CORRESPONDING AUTHOR), OPEN UNIV CYPRUS, LAB CHEM ENGN \& ENGN SUSTAINABIL, FAC PURE \& APPL SCI, CY-2220 NICOSIA, CYPRUS.; INGLEZAKIS, VASSILIS J., NAZARBAYEV UNIV, ENVIRONM SCI \& TECHNOL GRP ESTG, DEPT CHEM \& MAT ENGN, NUR SULTAN 010000, KAZAKHSTAN.; KURBANOVA, ALIYA, NAZARBAYEV UNIV, E…	SUSTAINABILITY	IN THIS STUDY, MAGNETIC FE(3)O(4)PARTICLES AND FE3O4-AG(0)NANOCOMPOSITES WERE PREPARED BY A FACILE AND GREEN METHOD, FULLY CHARACTERIZED AND USED FOR THE REMOVAL OF HG(2+)FROM WATER. CHARACTERIZATIONS SHOWED THAT THE FE(3)O(4)PARTICLES ARE QUASI-SPHERICAL WITH AN AVERAGE DIAMETER OF 217 NM AND METALLIC SILVER NANOPARTICLES FORMED ON THE SURFACE WITH A SIZE OF 23-41 NM. THE INITIAL HG(2+)REMOVAL R…		ATABAEV, TS (CORRESPONDING AUTHOR), NAZARBAYEV UNIV, DEPT CHEM, NUR SULTAN 010000, KAZAKHSTAN	10.3390/su12135489			SUSTAINABILITY	ENGLISH	14	13				MDPI	ISI	MAGNETIC FE3O4-AG0 NANOCOMPOSITES FOR EFFECTIVE MERCURY REMOVAL FROM WATER	ARTICLE		12	2020	INGLEZAKIS VASSILIS J;KURBANOVA ALIYA;MOLKENOVA ANARA; ZORPAS ANTONIS A;ATABAEV TIMUR SH	SUSTAINABILITY	In this study, magnetic Fe(3)O(4)particles and Fe3O4-Ag(0)nanocomposites were prepared by a facile and green method, fully characterized and used for the removal of Hg(2+)from water. Characterizations showed that the Fe(3)O(4)particles are quasi-spherical with an average diameter of 217 nm and metallic silver nanoparticles formed on the surface with a size of 23-41 nm. The initial Hg(2+)removal r…	Magnetic Fe3O4-Ag0 Nanocomposites for Effective Mercury Removal from Water	nanocomposites; magnetite; silver; mercury; amalgamation	none	NAZARBAYEV UNIV;OPEN UNIV CYPRUS;NAZARBAYEV UNIV;NAZARBAYEV UNIV;NAZARBAYEV UNIV;OPEN UNIV CYPRUS	NAZARBAYEV UNIV		INGLEZAKIS V, 2020, SUSTAINABILITY	INGLEZAKIS V, 2020, SUSTAINABILITY	ST ALBAN-ANLAGE 66, CH-4052 BASEL, SWITZERLAND	NAZARBAYEV UNIVERSITY; NAZARBAYEV UNIVERSITY; NAZARBAYEV UNIVERSITY; OPEN UNIVERSITY OF CYPRUS	5489	VASILEIOS.INGLEZAKIS@NU.EDU.KZ ALIYA.KURBANOVA@NU.EDU.KZ ANARA.MOLKENOVA@NU.EDU.KZ ANTONIS.ZORPAS@OUC.AC.CY TIMUR.ATABAEV@NU.EDU.KZ		2025-11-07	MM6MT	2071-1050			NAZARBAYEV UNIVERSITY [110119FD4536]	THIS RESEARCH WAS FUNDED BY NAZARBAYEV UNIVERSITY GRANT NUMBER 110119FD4536 AND THE APC WAS FUNDED BY THE SAME PROJECT.	JUL
LOPES C;FIGUEIRA P;TAVARES D;LIN Z;DANIEL-DA-SILVA A;DUARTE A;ROCHA J;TRINDADE T;PEREIRA E	MERCURY; NANOPOROUS; TITANOSILICATES; MAGNETITE PARTICLES; DITHIOCARBAMATE FUNCTIONALISATION; WATER TREATMENT; WATER FRAMEWORK; DIRECTIVE; EFFICIENT REMOVAL; METAL-IONS; SORPTION; HG2+; NANOPARTICLES; ADSORBENT; NICKEL; COPPER	MERCURY; NANOPOROUS; TITANOSILICATES; MAGNETITE PARTICLES; DITHIOCARBAMATE FUNCTIONALISATION; WATER TREATMENT; WATER FRAMEWORK; DIRECTIVE	EFFICIENT REMOVAL; METAL-IONS; SORPTION; HG2+; NANOPARTICLES; ADSORBENT; NICKEL; COPPER	LOPES, CB (CORRESPONDING AUTHOR), UNIV AVEIRO, CESAM, CAMPUS SANTIAGO, P-3810193 AVEIRO, PORTUGAL.; LOPES, C. B.; TAVARES, D. S.; DUARTE, A. C.; PEREIRA, E., UNIV AVEIRO, CESAM, P-3810193 AVEIRO, PORTUGAL.; LOPES, C. B.; FIGUEIRA, P.; TAVARES, D. S.; LIN, Z.; DANIEL-DA-SILVA, A. L.; DUARTE, A. C.; ROCHA, J.; TRINDADE, T.; PEREIRA, E., UNIV AVEIRO, DEPT CHEM, P-3810193 AVEIRO, PORTUGAL.; FIGUEIRA,…	ENVIRON. SCI. POLLUT. RES.	THE SORPTION CAPACITY OF NANOPOROUS TITANOSILICATE ENGELHARD TITANOSILICATE NUMBER 4 (ETS-4) AND SILICA-COATED MAGNETITE PARTICLES DERIVATISED WITH DITHIOCARBAMATE GROUPS TOWARDS HG(II) WAS EVALUATED AND COMPARED IN SPIKED ULTRA-PURE AND SPIKED SURFACE-RIVER WATER, FOR DIFFERENT BATCH FACTORS. IN THE FORMER, AND USING A BATCH FACTOR OF 100 M(3)/KG AND AN INITIAL HG(II) CONCENTRATIONS MATCHING THE…		LOPES, CB (CORRESPONDING AUTHOR), UNIV AVEIRO, CESAM, CAMPUS SANTIAGO, P-3810193 AVEIRO, PORTUGAL	10.1007/s11356-013-1615-z		0944-1344	ENVIRONMENTAL SCIENCE AND POLLUTION RESEARCH	ENGLISH	18	9	5963-5974			SPRINGER HEIDELBERG	ISI	CORE-SHELL MAGNETITE-SILICA DITHIOCARBAMATE-DERIVATISED PARTICLES ACHIEVE THE WATER FRAMEWORK DIRECTIVE QUALITY CRITERIA FOR MERCURY IN SURFACE WATERS	ARTICLE		20	2013	LOPES C B;FIGUEIRA P;TAVARES D S;LIN Z; DANIEL-DA-SILVA A L;DUARTE A C;ROCHA J;TRINDADE T;PEREIRA E	ENVIRON SCI POLLUT RES	The sorption capacity of nanoporous titanosilicate Engelhard titanosilicate number 4 (ETS-4) and silica-coated magnetite particles derivatised with dithiocarbamate groups towards Hg(II) was evaluated and compared in spiked ultra-pure and spiked surface-river water, for different batch factors. In the former, and using a batch factor of 100 m(3)/kg and an initial Hg(II) concentrations matching the…	Core-shell magnetite-silica dithiocarbamate-derivatised particles achieve the Water Framework Directive quality criteria for mercury in surface waters	Mercury; Nanoporous; Titanosilicates; Magnetite particles; Dithiocarbamate functionalisation; Water treatment; Water Framework; Directive	none	UNIV AVEIRO;TAVARES;UNIV AVEIRO;TAVARES;UNIV AVEIRO;UNIV AVEIRO	UNIV AVEIRO		LOPES C, 2013, ENVIRON SCI POLLUT RES	LOPES C, 2013, ENVIRON SCI POLLUT RES	TIERGARTENSTRASSE 17, D-69121 HEIDELBERG, GERMANY	UNIVERSIDADE DE AVEIRO; UNIVERSIDADE DE AVEIRO; UNIVERSIDADE DE AVEIRO		CLAUDIA.B.LOPES@UA.PT		2025-11-07	187XQ	1614-7499			FUNDACAO PARA A CIENCIA E A TECNOLOGIA (FCT) [PTDC/CTM-NAN/120668/2010, SFRH/BPD/45156/2008]; FSE; POPH; FCT; FEDER [PEST-C/MAR/LA0017/2011, PEST-C/CTM/LA0011/2011]; FUNDAÇÃO PARA A CIÊNCIA E A TECNOLOGIA [SFRH/BPD/45156/2008, PTDC/CTM-NAN/120668/2010] FUNDING SOURCE: FCT	THE AUTHORS THANK FUNDACAO PARA A CIENCIA E A TECNOLOGIA (FCT; PTDC/CTM-NAN/120668/2010), FSE AND POPH FOR FUNDING. ONE OF THE AUTHORS, C.B. LOPES, THANKS FUNDACAO PARA A CIENCIA E TECNOLOGIA (FCT) FOR A POST-DOC GRANT (SFRH/BPD/45156/2008). FCT AND FEDER ARE ALSO THANKED FINANCING PROJECTS PEST-C/MAR/LA0017/2011 AND PEST-C/CTM/LA0011/2011.	SEP
GENETI S;MEKONNEN G;MURTHY H;ANANDA A;MOHAMMED E;RAVIKUMAR C;GONFA ;BEDASA A B;SABIR F	WASTE-WATER; CR VI; ADSORPTION; DEGRADATION; SORPTION; CR(VI)		WASTE-WATER; CR VI; ADSORPTION; DEGRADATION; SORPTION; CR(VI)	GONFA, BA; SABIR, FK (CORRESPONDING AUTHOR), ADAMA SCI \& TECHNOL UNIV, SCH APPL NAT SCI, DEPT APPL CHEM, POB 1888, ADAMA 1888, ETHIOPIA.; GENETI, SINTAYEHU TAMENNE; MEKONNEN, GEMECHIS ASFAW; MURTHY, H. C. ANANDA; GONFA, BEDASA ABDISA; SABIR, FEDLU KEDIR, ADAMA SCI \& TECHNOL UNIV, SCH APPL NAT SCI, DEPT APPL CHEM, POB 1888, ADAMA 1888, ETHIOPIA.; MOHAMMED, ENDALE TSEGAYE, HAWASSA UNIV, COLL NAT …	J. NANOMATER.	CURRENTLY, PLANT TEMPLATED SYNTHESIS OF MAGNETITE IRON OXIDE NANOPARTICLES (FE3O4 NPS) WAS EMERGED FOR MULTIFUNCTIONAL PURPOSES. IN THIS STUDY, THE LEAF EXTRACT OF THE PLANT THYMUS SCHIMPERI WAS UTILIZED TO SYNTHESIZE FE3O4 NPS. THE SYNTHESIZED NPS WERE CHARACTERIZED BY USING TECHNICAL TOOLS SUCH AS X-RAY DIFFRACTION (XRD) SPECTROSCOPY, FOURIER TRANSFORM INFRARED (FT-IR) SPECTROSCOPY, SCANNING EL…		GONFA, BA; SABIR, FK (CORRESPONDING AUTHOR), ADAMA SCI \& TECHNOL UNIV, SCH APPL NAT SCI, DEPT APPL CHEM, POB 1888, ADAMA 1888, ETHIOPIA	10.1155/2022/5798824		1687-4110	JOURNAL OF NANOMATERIALS	ENGLISH	20					HINDAWI LTD	ISI	BIOGENIC SYNTHESIS OF MAGNETITE NANOPARTICLES USING LEAF EXTRACT OF THYMUS SCHIMPERI AND THEIR APPLICATION FOR MONOCOMPONENT REMOVAL OF CHROMIUM AND MERCURY IONS FROM AQUEOUS SOLUTION	ARTICLE		2022	2022	GENETI SINTAYEHU TAMENNE;MEKONNEN GEMECHIS ASFAW;MURTHY H C; ANANDA;MOHAMMED ENDALE TSEGAYE;RAVIKUMAR C R;GONFA; BEDASA ABDISA;SABIR FEDLU KEDIR	J NANOMATER	Currently, plant templated synthesis of magnetite iron oxide nanoparticles (Fe3O4 NPs) was emerged for multifunctional purposes. In this study, the leaf extract of the plant Thymus schimperi was utilized to synthesize Fe3O4 NPs. The synthesized NPs were characterized by using technical tools such as X-ray diffraction (XRD) spectroscopy, Fourier transform infrared (FT-IR) spectroscopy, scanning el…	Biogenic Synthesis of Magnetite Nanoparticles Using Leaf Extract of Thymus schimperi and Their Application for Monocomponent Removal of Chromium and Mercury Ions from Aqueous Solution		none	ADAMA SCI AND TECHNOL UNIV;ADAMA SCI AND TECHNOL UNIV;HAWASSA UNIV;EAST WEST INST TECHNOL	NOTREPORTED;ADAMA SCI AND TECHNOL UNIV		GENETI S, 2022, J NANOMATER	GENETI S, 2022, J NANOMATER	ADAM HOUSE, 3RD FLR, 1 FITZROY SQ, LONDON, W1T 5HF, ENGLAND	ADAMA SCIENCE \& TECHNOLOGY UNIVERSITY; HAWASSA UNIVERSITY	5798824	SINIMODI2015@GMAIL.COM ASFAWWGEMECHIS@GMAIL.COM ANANDKPS350@GMAIL.COM ENDALE1998@YAHOO.COM RAVICR128@GMAIL.COM BEDASSA.ABDISSA@ASTU.EDU.ET FEDLUKED130@GMAIL.COM		2025-11-07	1V6HB	1687-4129			ADAMA SCIENCE AND TECHNOLOGY UNIVERSITY (ASTU)	(F. K. SABIR) AND S. T. GENETI (MY STUDENT WHO USED THIS WORK AS HIS M,SC. THESIS) GREATLY ACKNOWLEDGED ADAMA SCIENCE AND TECHNOLOGY UNIVERSITY (ASTU) FOR PROVIDING FINANCIAL SUPPORT THROUGH ASTU'S 12TH CYCLE RESEARCH GRANT SUCCESSFULLY. THE AUTHORS EXTEND THEIR THANKS TO THE DEPARTMENT OF APPLIED CHEMISTRY AND DEPARTMENT OF MATERIALS SCIENCE AND ENGINEERING AT ASTU FOR PROVIDING FACILITIES SUCH …	APR 15
OLIVEIRA M L;SANTOS M;ANDRADE ;THAINA G T;HOTT R;DA S F M;CRISTINA C;ALVES O L;PEREIRA M;RODRIGUES J	MERCURY; ADSORPTION; FE3O4; AU NANOPARTICLES; FUNCTIONALISATION; HEAVY-METAL IONS; AQUEOUS-SOLUTIONS; EFFICIENT REMOVAL; HETEROGENEOUS; PHOTOCATALYSIS; INORGANIC MERCURY; ACTIVATED CARBON; GRANULAR SLUDGE; HG(II) IONS; HG-II	MERCURY; ADSORPTION; FE3O4; AU NANOPARTICLES; FUNCTIONALISATION	HEAVY-METAL IONS; AQUEOUS-SOLUTIONS; EFFICIENT REMOVAL; HETEROGENEOUS; PHOTOCATALYSIS; INORGANIC MERCURY; ACTIVATED CARBON; GRANULAR SLUDGE; HG(II) IONS; HG-II; ADSORPTION	RODRIGUES, JL (CORRESPONDING AUTHOR), UNIV FED VALES JEQUITINHONHA \& MUCURI, INST CIENCIA ENGN \& TECNOL, TEOFILO OTONI, BRAZIL.; OLIVEIRA MAIA, LUIZ FERNANDO; SANTOS, MAYRA SOARES; ANDRADE, THAINA GUSMAO; HOTT, RODRIGO DE CARVALHO; DA SILVA FARIA, MARCIA CRISTINA; PEREIRA, MARCIO CESAR; RODRIGUES, JAIRO LISBOA, UNIV FED VALES JEQUITINHONHA \& MUCURI, INST CIENCIA ENGN \& TECNOL, TEOFILO OTONI, …	ENVIRON. TECHNOL.	FE3O4 NANOPARTICLES WERE PREPARED BY CO-PRECIPITATION OF FE2+ AND FE3+ AND THEN MODIFIED WITH AU TO PRODUCE AN EFFECTIVE ADSORBENT (FE3O4/AU) FOR AQUEOUS HG(II) IN CONTAMINATED WATER. RIETVELD REFINEMENT ON THE XRD PATTERN CONFIRMED THAT THE FE3O4/AU WAS SYNTHESISED. MOSSBAUER SPECTRA EXHIBITED BROAD AND ASYMMETRIC RESONANCE LINES WITH TWO SEXTETS WHICH CAN BE ASSIGNED TO TETRAHEDRAL FE3+; AND OC…		RODRIGUES, JL (CORRESPONDING AUTHOR), UNIV FED VALES JEQUITINHONHA \& MUCURI, INST CIENCIA ENGN \& TECNOL, TEOFILO OTONI, BRAZIL	10.1080/09593330.2018.1515989		0959-3330	ENVIRONMENTAL TECHNOLOGY	ENGLISH	19	8	959-970			TAYLOR \& FRANCIS LTD	ISI	REMOVAL OF MERCURY(II) FROM CONTAMINATED WATER BY GOLD-FUNCTIONALISED FE3O4 MAGNETIC NANOPARTICLES	ARTICLE		41	2020	OLIVEIRA MAIA LUIZ FERNANDO;SANTOS MAYRA SOARES;ANDRADE; THAINA GUSMAO;HOTT RODRIGO DE CARVALHO;DA SILVA FARIA MARCIA; CRISTINA;ALVES OLIVEIRA LUIZ CARLOS;PEREIRA MARCIO CESAR; RODRIGUES JAIRO LISBOA	ENVIRON TECHNOL	Fe3O4 nanoparticles were prepared by co-precipitation of Fe2+ and Fe3+ and then modified with Au to produce an effective adsorbent (Fe3O4/Au) for aqueous Hg(II) in contaminated water. Rietveld refinement on the XRD pattern confirmed that the Fe3O4/Au was synthesised. Mossbauer spectra exhibited broad and asymmetric resonance lines with two sextets which can be assigned to tetrahedral Fe3+; and oc…	Removal of mercury(II) from contaminated water by gold-functionalised Fe3O4 magnetic nanoparticles	Mercury; adsorption; Fe3O4; Au nanoparticles; functionalisation	none	UNIV FED VALES JEQUITINHONHA AND MUCURI;MAYRA SOARES;UNIV FED VALES JEQUITINHONHA AND MUCURI;UNIV FED MINAS GERAIS	UNIV FED VALES JEQUITINHONHA AND MUCURI		OLIVEIRA M L, 2020, ENVIRON TECHNOL	OLIVEIRA M L, 2020, ENVIRON TECHNOL	2-4 PARK SQUARE, MILTON PARK, ABINGDON OR14 4RN, OXON, ENGLAND	UNIVERSIDADE FEDERAL DOS VALES DO JEQUITINHONHA E MUCURI (UFVJM); UNIVERSIDADE FEDERAL DE MINAS GERAIS		JAIRO.RODRIGUES@UFVJM.EDU.BR		2025-11-07	KR1GF	1479-487X			CNPQ; FAPEMIG; CAPES	THE AUTHORS ARE GRATEFUL TO CNPQ, FAPEMIG, AND CAPES FOR THE FINANCIAL SUPPORT AND FELLOWSHIPS.	APR 2
ANTARNUSA G	WASTEWATER TREATMENT; CIUJUNG RIVER; ADSORPTION; HEAVY METAL; FE3O4; SOLVOTHERMAL SYNTHESIS; MAGNETIC-PROPERTIES; ISOTHERM; REMOVAL; IONS	WASTEWATER TREATMENT; CIUJUNG RIVER; ADSORPTION; HEAVY METAL; FE3O4	SOLVOTHERMAL SYNTHESIS; MAGNETIC-PROPERTIES; ISOTHERM; REMOVAL; IONS	ANTARNUSA, G (CORRESPONDING AUTHOR), UNIV SULTAN AGENG TIRTAYASA, DEPT PHYS EDUC, SERANG, INDONESIA.; ANTARNUSA, GANESHA, UNIV SULTAN AGENG TIRTAYASA, DEPT PHYS EDUC, SERANG, INDONESIA.	RESULTS ENG.	THE CIUJUNG RIVER, ONE OF THE MAIN RIVERS IN BANTEN PROVINCE, INDONESIA, PLAYS AN IMPORTANT ROLE IN AGRICULTURE AND SANITATION. HOWEVER, THE INCREASING USE OF HEAVY METALS, ESPECIALLY MERCURY, BY INDUSTRIES ALONG THE CIUJUNG RIVER HAS CAUSED SIGNIFICANT ENVIRONMENTAL POLLUTION. THIS ISSUE REQUIRES CONSIDERABLE ATTENTION TO ENSURE THAT ENVIRONMENTAL PROBLEMS CAN BE RESOLVED IMMEDIATELY. THIS STUDY…		ANTARNUSA, G (CORRESPONDING AUTHOR), UNIV SULTAN AGENG TIRTAYASA, DEPT PHYS EDUC, SERANG, INDONESIA	10.1016/j.rineng.2024.102804		2590-1230	RESULTS IN ENGINEERING	ENGLISH	7					ELSEVIER	ISI	PURIFICATION OF MERCURY IN CIUJUNG RIVER WATER, BANTEN PROVINCE, INDONESIA BY ADSORPTION METHOD USING FE3O4 NANOPARTICLES	ARTICLE		24	2024	ANTARNUSA GANESHA	RESULTS ENG	The Ciujung River, one of the main rivers in Banten province, Indonesia, plays an important role in agriculture and sanitation. However, the increasing use of heavy metals, especially mercury, by industries along the Ciujung River has caused significant environmental pollution. This issue requires considerable attention to ensure that environmental problems can be resolved immediately. This study…	Purification of mercury in Ciujung River water, Banten province, Indonesia by adsorption method using Fe3O4 nanoparticles	Wastewater treatment; Ciujung River; Adsorption; Heavy metal; Fe3O4	none	UNIV SULTAN AGENG TIRTAYASA;UNIV SULTAN AGENG TIRTAYASA	UNIV SULTAN AGENG TIRTAYASA		ANTARNUSA G, 2024, RESULTS ENG	ANTARNUSA G, 2024, RESULTS ENG	RADARWEG 29, 1043 NX AMSTERDAM, NETHERLANDS	UNIVERSITAS SULTAN AGENG TIRTAYASA	102804	GANESHA.ANTARNUSA@UNTIRTA.AC.ID		2025-11-07	G2F5F		SEP 2024		UNIVERSITAS SULTAN AGENG TIRTAYASA THROUGH THE ` PENELITIAN DOSEN PEMULA [SP.DIPA-023.17.2.677573/2024]	THIS WORK WAS FUNDED BY UNIVERSITAS SULTAN AGENG TIRTAYASA THROUGH THE ` PENELITIAN DOSEN PEMULA, DIPA 2024 ` RESEARCH SCHEME UNDER GRANT NUMBER SP.DIPA-023.17.2.677573/2024. THE AUTHOR WOULD LIKE TO THANK UNIVERSITAS SULTAN AGENG TIRTAYASA FOR FACILITATING THIS RESEARCH.	DEC
LEWIS A;HUNTINGTON T;MARVIN-DIPASQUALE M;AMIRBAHMAN A	MERCURY; ZERO VALENT IRON; GRANULAR ACTIVATED CARBON; WETLANDS; REMEDIATION; METHYLMERCURY PRODUCTION; PRINCIPAL METHYLATORS; BIOACCUMULATION; LAKE; BIOAVAILABILITY; REDUCTION; RHIZOSPHERE; AMENDMENT; PATTERNS; BACTERIA	MERCURY; ZERO VALENT IRON; GRANULAR ACTIVATED CARBON; WETLANDS; REMEDIATION	METHYLMERCURY PRODUCTION; PRINCIPAL METHYLATORS; BIOACCUMULATION; LAKE; BIOAVAILABILITY; REDUCTION; RHIZOSPHERE; AMENDMENT; PATTERNS; BACTERIA	AMIRBAHMAN, A (CORRESPONDING AUTHOR), UNIV MAINE, DEPT CIVIL \& ENVIRONM ENGN, ORONO, ME USA.; LEWIS, ARIEL S.; AMIRBAHMAN, ARIA, UNIV MAINE, DEPT CIVIL \& ENVIRONM ENGN, ORONO, ME USA.; HUNTINGTON, THOMAS G., US GEOL SURVEY, AUGUSTA, ME USA.; MARVIN-DIPASQUALE, MARK C., US GEOL SURVEY, MENLO PK, CA USA.	ENVIRON. POLLUT.	WETLANDS ARE HOTSPOTS FOR PRODUCTION OF TOXIC METHYLMERCURY (MEHG) THAT CAN BIOACCUMULATE IN THE FOOD WEB. THE OBJECTIVE OF THIS STUDY WAS TO DETERMINE WHETHER THE APPLICATION OF ZERO-VALENT IRON (ZVI) OR GRANULAR ACTIVATED CARBON (GAC) TO WETLAND SEDIMENT COULD REDUCE MEHG PRODUCTION AND BIOAVAILABILITY TO BENTHIC ORGANISMS. FIELD MESOCOSMS WERE INSTALLED IN A WETLAND FRINGING HODGDON POND (MAIN…		AMIRBAHMAN, A (CORRESPONDING AUTHOR), UNIV MAINE, DEPT CIVIL \& ENVIRONM ENGN, ORONO, ME USA	10.1016/j.envpol.2015.11.047		0269-7491	ENVIRONMENTAL POLLUTION	ENGLISH	33		366-373			ELSEVIER SCI LTD	ISI	MERCURY REMEDIATION IN WETLAND SEDIMENT USING ZERO-VALENT IRON AND GRANULAR ACTIVATED CARBON	ARTICLE		212	2016	LEWIS ARIEL S;HUNTINGTON THOMAS G;MARVIN-DIPASQUALE MARK C;AMIRBAHMAN ARIA	ENVIRON POLLUT	Wetlands are hotspots for production of toxic methylmercury (MeHg) that can bioaccumulate in the food web. The objective of this study was to determine whether the application of zero-valent iron (ZVI) or granular activated carbon (GAC) to wetland sediment could reduce MeHg production and bioavailability to benthic organisms. Field mesocosms were installed in a wetland fringing Hodgdon Pond (Main…	Mercury remediation in wetland sediment using zero-valent iron and granular activated carbon	Mercury; Zero valent iron; Granular activated carbon; Wetlands; Remediation	none	UNIV MAINE;UNIV MAINE	UNIV MAINE		LEWIS A, 2016, ENVIRON POLLUT	LEWIS A, 2016, ENVIRON POLLUT	THE BOULEVARD, LANGFORD LANE, KIDLINGTON, OXFORD OX5 1GB, OXON, ENGLAND	UNIVERSITY OF MAINE SYSTEM; UNIVERSITY OF MAINE ORONO; UNITED STATES DEPARTMENT OF THE INTERIOR; UNITED STATES GEOLOGICAL SURVEY; UNITED STATES DEPARTMENT OF THE INTERIOR; UNITED STATES GEOLOGICAL SURVEY		ARIAA@MAINE.EDU		2025-11-07	DN1BA	1873-6424			USGS-NATIONAL PARK SERVICE WATER QUALITY PARTNERSHIP PROGRAM; USGS-TOXICS PROGRAM; OFFICE OF THE DIRECTOR; OFFICE OF INTEGRATIVE ACTIVITIES [1355457] FUNDING SOURCE: NATIONAL SCIENCE FOUNDATION	FUNDING FOR THIS WORK WAS PROVIDED BY A GRANT FROM THE USGS-NATIONAL PARK SERVICE WATER QUALITY PARTNERSHIP PROGRAM. ADDITIONAL FUNDING WAS PROVIDED BY THE USGS-TOXICS PROGRAM. CLIVE DEVOY, KAREN SMALL AND THE STAFF OF THE SAWYER ENVIRONMENTAL CHEMISTRY RESEARCH LABORATORY AT THE UNIVERSITY OF MAINE, AND EVANGELOS KAKOUROS, MICHELLE ARIAS, LE KIEU AND JENNIFER AGEE OF THE US GEOLOGICAL SURVEY (ME…	MAY
GUO X;YANG Z;DONG H;GUAN X;REN ;QIDONG Q;LV X;JIN X	ARSENIC; CADMIUM; HEAVY METALS; MERCURY; OXIDANTS; ZERO-VALENT IRON; (ZVI); SURFACE COMPLEXATION; NITRATE REDUCTION; ARSENIC REMOVAL; ZEROVALENT; IRON; REMEDIATION; GROUNDWATER; FIELD; OXYHYDROXIDE; KINETICS; WASTEWATERS	ARSENIC; CADMIUM; HEAVY METALS; MERCURY; OXIDANTS; ZERO-VALENT IRON; (ZVI)	SURFACE COMPLEXATION; NITRATE REDUCTION; ARSENIC REMOVAL; ZEROVALENT; IRON; REMEDIATION; GROUNDWATER; FIELD; OXYHYDROXIDE; KINETICS; WASTEWATERS	GUO, XJ (CORRESPONDING AUTHOR), BEIJING NORMAL UNIV, SCH ENVIRONM, STATE KEY LAB ENVIRONM SIMULAT, 19 XINJIEKOUWAI ST, BEIJING 100875, PEOPLES R CHINA.; GUO, XUEJUN; YANG, ZHE; DONG, HAIYANG; REN, QIDONG; LV, XIAOFANG; JIN, XIN, BEIJING NORMAL UNIV, SCH ENVIRONM, STATE KEY LAB ENVIRONM SIMULAT, BEIJING 100875, PEOPLES R CHINA.; GUAN, XIAOHONG, TONGJI UNIV, STATE KEY LAB POLLUT CONTROL \& RESOURCE…	WATER RES.	THIS STUDY, FOR THE FIRST TIME, DEMONSTRATED A CONTINUOUSLY ACCELERATED FE CORROSION DRIVEN BY COMMON OXIDANTS (I.E., NACLO, KMNO4 OR H2O2) AND THEREBY THE RAPID AND EFFICIENT REMOVAL OF HEAVY METALS (HMS) BY ZERO-VALENT IRON (ZVI) UNDER THE EXPERIMENTAL CONDITIONS OF JAR TESTS AND COLUMN RUNNING. ZVI SIMPLY COUPLED WITH NACLO, KMNO4 OR H2O2 (0.5 MM) RESULTED IN ALMOST COMPLETE AS(V) REMOVAL WITH…		GUO, XJ (CORRESPONDING AUTHOR), BEIJING NORMAL UNIV, SCH ENVIRONM, STATE KEY LAB ENVIRONM SIMULAT, 19 XINJIEKOUWAI ST, BEIJING 100875, PEOPLES R CHINA	10.1016/j.watres.2015.10.045		0043-1354	WATER RESEARCH	ENGLISH	223		671-680			PERGAMON-ELSEVIER SCIENCE LTD	ISI	SIMPLE COMBINATION OF OXIDANTS WITH ZERO-VALENT-IRON (ZVI) ACHIEVED VERY RAPID AND HIGHLY EFFICIENT REMOVAL OF HEAVY METALS FROM WATER	ARTICLE		88	2016	GUO XUEJUN;YANG ZHE;DONG HAIYANG;GUAN XIAOHONG;REN; QIDONG;LV XIAOFANG;JIN XIN	WATER RES	This study, for the first time, demonstrated a continuously accelerated Fe corrosion driven by common oxidants (i.e., NaClO, KMnO4 or H2O2) and thereby the rapid and efficient removal of heavy metals (HMs) by zero-valent iron (ZVI) under the experimental conditions of jar tests and column running. ZVI simply coupled with NaClO, KMnO4 or H2O2 (0.5 mM) resulted in almost complete As(V) removal with…	Simple combination of oxidants with zero-valent-iron (ZVI) achieved very rapid and highly efficient removal of heavy metals from water	Arsenic; Cadmium; Heavy metals; Mercury; Oxidants; Zero-valent iron; (ZVI)	none	BEIJING NORMAL UNIV;BEIJING NORMAL UNIV;TONGJI UNIV	BEIJING NORMAL UNIV		GUO X, 2016, WATER RES	GUO X, 2016, WATER RES	THE BOULEVARD, LANGFORD LANE, KIDLINGTON, OXFORD OX5 1GB, ENGLAND	BEIJING NORMAL UNIVERSITY; TONGJI UNIVERSITY		GUOXJ@BNU.EDU.CN		2025-11-07	CZ7JU				NATIONAL NATURAL SCIENCE FOUNDATION OF CHINA (NSFC) [41371440, 21077013]; FUNDAMENTAL RESEARCH FUNDS FOR THE CENTRAL UNIVERSITIES [2015KJJCB19]	THIS WORK WAS SUPPORTED BY NATIONAL NATURAL SCIENCE FOUNDATION OF CHINA (NSFC) (GRANT NOS. 41371440 AND 21077013) AND THE FUNDAMENTAL RESEARCH FUNDS FOR THE CENTRAL UNIVERSITIES (2015KJJCB19). THE AUTHORS THANK BEAMLINE BL14W1 (SHANGHAI SYNCHROTRON RADIATION FACILITY) FOR PROVIDING THE BEAM TIME.	JAN 1
GUNNERIUSSON L;BAXTER D;EMTEBORG H	ACID-BASE REACTIONS; ADSORPTION		ACID-BASE REACTIONS; ADSORPTION	GUNNERIUSSON, L (CORRESPONDING AUTHOR), UMEA UNIV,DEPT INORGAN CHEM,S-90187 UMEA,SWEDEN.; UMEA UNIV,DEPT ANALYT CHEM,S-90187 UMEA,SWEDEN.	J. COLLOID INTERFACE SCI.	SURFACE COMPLEXATION OF INORGANIC MERCURY(II) AND MONOMETHYL MERCURY (CH3HG+) ONTO A HYDROUS GOETHITE (ALPHA-FEOOH) SURFACE HAS BEEN STUDIED. THE PH (-LOG[H+]) HAS BEEN VARIED WITHIN THE RANGE 2.7 < -LOG[H+] < 9, AT 298 K, USING A 0.1 MOL DM(-3) NANO3 MEDIUM. LOW TOTAL MERCURY CONCENTRATIONS(APPROXIMATE TO 1 MU MOL DM(-3)) WERE USED. INORGANIC MERCURY AND METHYL MERCURY CONTENT IN THE WATER PHASE…		GUNNERIUSSON, L (CORRESPONDING AUTHOR), UMEA UNIV,DEPT INORGAN CHEM,S-90187 UMEA,SWEDEN	10.1006/jcis.1995.1033		0021-9797	JOURNAL OF COLLOID AND INTERFACE SCIENCE	ENGLISH	12	2	262-266			ACADEMIC PRESS INC JNL-COMP SUBSCRIPTIONS	ISI	COMPLEXATION AT LOW CONCENTRATIONS OF METHYL AND INORGANIC MERCURY(II) TO A HYDROUS GOETHITE (ALPHA-FEOOH) SURFACE	ARTICLE		169	1995	GUNNERIUSSON L;BAXTER D;EMTEBORG H	J COLLOID INTERFACE SCI	Surface complexation of inorganic mercury(II) and monomethyl mercury (CH3Hg+) onto a hydrous goethite (alpha-FeOOH) surface has been studied. The ph (-log[H+]) has been varied within the range 2.7 < -log[H+] < 9, at 298 K, using a 0.1 mol dm(-3) NaNO3 medium. Low total mercury concentrations(approximate to 1 mu mol dm(-3)) were used. Inorganic mercury and methyl mercury content in the water phase…	COMPLEXATION AT LOW CONCENTRATIONS OF METHYL AND INORGANIC MERCURY(II) TO A HYDROUS GOETHITE (ALPHA-FEOOH) SURFACE		none	UMEA UNIV;UMEA UNIV	UMEA UNIV		GUNNERIUSSON L, 1995, J COLLOID INTERFACE SCI	GUNNERIUSSON L, 1995, J COLLOID INTERFACE SCI	525B STREET, SUITE 1900, SAN DIEGO, CA 92101-4495	UMEA UNIVERSITY				2025-11-07	QC814						FEB
FANG R;LU C;ZHONG Y;XIAO Z;LIANG C;HUANG H;GAN Y;ZHANG J;PAN G;XIA X;XIA Y;ZHANG W	ZERO-VALENT-IRON; IONS; ADSORPTION; WATER; REMEDIATION; COMPOSITES; NANOTUBES; ADSORBENT; TRANSPORT; GRAPHENE		ZERO-VALENT-IRON; IONS; ADSORPTION; WATER; REMEDIATION; COMPOSITES; NANOTUBES; ADSORBENT; TRANSPORT; GRAPHENE	XIA, Y (CORRESPONDING AUTHOR), ZHEJIANG UNIV TECHNOL, COLL MAT SCI \& ENGN, HANGZHOU 310014, ZHEJIANG, PEOPLES R CHINA.; XIA, XH (CORRESPONDING AUTHOR), ZHEJIANG UNIV, SCH MAT SCI \& ENGN, KEY LAB ADV MAT \& APPLICAT BATTERIES ZHEJIANG PRO, STATE KEY LAB SILICON MAT, HANGZHOU 310027, ZHEJIANG, PEOPLES R CHINA.; FANG, RUYI; LU, CHENGWEI; LIANG, CHU; HUANG, HUI; GAN, YONGPING; ZHANG, JUN; XIA, YANG…	ENVIRON. SCI. TECHNOL.	DEVELOPMENT OF LOW-COST, HIGH-EFFICIENCY, AND ENVIRONMENTALLY BENIGN ADSORBENTS FOR MERCURY REMOVAL IS OF SIGNIFICANT IMPORTANCE FOR ENVIRONMENTAL REMEDIATION. HEREIN, WE REPORT A NOVEL POROUS PUFFED RICE CARBON (PRC) WITH CO-IMPLANTED METAL IRON AND SULFUR, FORMING A HIGH-QUALITY PRC/FE@S COMPOSITE AS A HIGH-EFFICIENCY ADSORBENT FOR MERCURY REMOVAL FROM AQUEOUS SOLUTION. THE IN SITU-FORMED FE NA…		XIA, Y (CORRESPONDING AUTHOR), ZHEJIANG UNIV TECHNOL, COLL MAT SCI \& ENGN, HANGZHOU 310014, ZHEJIANG, PEOPLES R CHINA	10.1021/acs.est.9b07385		0013-936X	ENVIRONMENTAL SCIENCE \& TECHNOLOGY	ENGLISH	56	4	2539-2547			AMER CHEMICAL SOC	ISI	PUFFED RICE CARBON WITH COUPLED SULFUR AND METAL IRON FOR HIGH-EFFICIENCY MERCURY REMOVAL IN AQUEOUS SOLUTION	ARTICLE		54	2020	FANG RUYI;LU CHENGWEI;ZHONG YU;XIAO ZHEN;LIANG CHU;HUANG HUI;GAN YONGPING;ZHANG JUN;PAN GUOXIANG; XIA XINHUI;XIA YANG;ZHANG WENKUI	ENVIRON SCI TECHNOL	Development of low-cost, high-efficiency, and environmentally benign adsorbents for mercury removal is of significant importance for environmental remediation. Herein, we report a novel porous puffed rice carbon (PRC) with co-implanted metal iron and sulfur, forming a high-quality PRC/Fe@S composite as a high-efficiency adsorbent for mercury removal from aqueous solution. The in situ-formed Fe na…	Puffed Rice Carbon with Coupled Sulfur and Metal Iron for High-Efficiency Mercury Removal in Aqueous Solution		none	ZHEJIANG UNIV TECHNOL;ZHEJIANG UNIV;ZHEJIANG UNIV TECHNOL;ZHEJIANG UNIV;CHINA JILIANG UNIV;HUZHOU UNIV	ZHEJIANG UNIV TECHNOL		FANG R, 2020, ENVIRON SCI TECHNOL	FANG R, 2020, ENVIRON SCI TECHNOL	1155 16TH ST, NW, WASHINGTON, DC 20036 USA	ZHEJIANG UNIVERSITY OF TECHNOLOGY; ZHEJIANG UNIVERSITY; CHINA JILIANG UNIVERSITY; HUZHOU UNIVERSITY		HELLOXXH@ZJU.EDU.CN NANOSHINE@ZJUT.EDU.CN		2025-11-07	KN3RW	1520-5851			NATURAL SCIENCE FOUNDATION OF ZHEJIANG PROVINCE [LY18E020009, LY17E020010]; SCIENCE AND TECHNOLOGY DEPARTMENT OF ZHEJIANG PROVINCE [2016C31012]; NATIONAL NATURAL SCIENCE FOUNDATION OF CHINA [51772272, 51502263, 51728204, 51572240]; FUNDAMENTAL RESEARCH FUNDS FOR THE CENTRAL UNIVERSITIES [2018QNA4011]; QIANJIANG TALENTS PLAN D [QJD1602029]; STARTUP FOUNDATION FOR HUNDRED-TALENT PROGRAM OF ZHEJIANG…	Y.X. GRATEFULLY ACKNOWLEDGES FINANCIAL SUPPORTS FROM THE NATURAL SCIENCE FOUNDATION OF ZHEJIANG PROVINCE (LY17E020010) AND THE SCIENCE AND TECHNOLOGY DEPARTMENT OF ZHEJIANG PROVINCE (2016C31012). Z.X. ACKNOWLEDGES THE FINANCIAL SUPPORT FROM THE NATURAL SCIENCE FOUNDATION OF ZHEJIANG PROVINCE (LY18E020009). X.X. ACKNOWLEDGES THE FINANCIAL SUPPORTS BY THE NATIONAL NATURAL SCIENCE FOUNDATION OF CHIN…	FEB 18
VENKATESWARLU S;YOON M	HEAVY-METAL IONS; AQUEOUS-SOLUTIONS; WASTE-WATER; MERCURY; ADSORPTION; ADSORBENT; COMPOSITE; COPRECIPITATION; SYSTEMS; ACID		HEAVY-METAL IONS; AQUEOUS-SOLUTIONS; WASTE-WATER; MERCURY; ADSORPTION; ADSORBENT; COMPOSITE; COPRECIPITATION; SYSTEMS; ACID	YOON, M (CORRESPONDING AUTHOR), GACHON UNIV, COLL BIONANO, DEPT NANOCHEM, SONGNAM 13120, SOUTH KOREA.; VENKATESWARLU, SADA; YOON, MINYOUNG, GACHON UNIV, COLL BIONANO, DEPT NANOCHEM, SONGNAM 13120, SOUTH KOREA.	DALTON TRANS.	MERCURY IS CONSIDERED ONE OF THE MOST NOTORIOUS GLOBAL POLLUTANTS DUE TO ITS HIGH TOXICITY AND WIDESPREAD USE IN INDUSTRY. ALTHOUGH MANY MATERIALS HAVE BEEN DEVELOPED FOR THE REMOVAL OF MERCURY FOR WATER PURIFICATION, MOST OF THESE MATERIALS ARE DIFFICULT TO REUSE, WHICH MAY LEAD TO AN INCREASE IN THE MERCURY HANDLING EXPENSE. THEREFORE, NEW SUSTAINABLE MATERIALS THAT CAN BE EASILY RECYCLED AND A…		YOON, M (CORRESPONDING AUTHOR), GACHON UNIV, COLL BIONANO, DEPT NANOCHEM, SONGNAM 13120, SOUTH KOREA	10.1039/c5dt03155a		1477-9226	DALTON TRANSACTIONS	ENGLISH	75	42	18427-18437			ROYAL SOC CHEMISTRY	ISI	SURFACTANT-FREE GREEN SYNTHESIS OF FE3O4 NANOPARTICLES CAPPED WITH 3,4-DIHYDROXY-PHENETHYLCARBAMODITHIOATE: STABLE RECYCLABLE MAGNETIC NANOPARTICLES FOR THE RAPID AND EFFICIENT REMOVAL OF HG(II) IONS FROM WATER	ARTICLE		44	2015	VENKATESWARLU SADA;YOON MINYOUNG	DALTON TRANS	Mercury is considered one of the most notorious global pollutants due to its high toxicity and widespread use in industry. Although many materials have been developed for the removal of mercury for water purification, most of these materials are difficult to reuse, which may lead to an increase in the mercury handling expense. Therefore, new sustainable materials that can be easily recycled and a…	Surfactant-free green synthesis of Fe3O4 nanoparticles capped with 3,4-dihydroxy-phenethylcarbamodithioate: stable recyclable magnetic nanoparticles for the rapid and efficient removal of Hg(II) ions from water		none	GACHON UNIV;GACHON UNIV	GACHON UNIV		VENKATESWARLU S, 2015, DALTON TRANS	VENKATESWARLU S, 2015, DALTON TRANS	THOMAS GRAHAM HOUSE, SCIENCE PARK, MILTON RD, CAMBRIDGE CB4 0WF, CAMBS, ENGLAND	GACHON UNIVERSITY		MYYOON@GACHON.AC.KR		2025-11-07	CU5OD	1477-9234			R\&D PROGRAM FOR SOCIETY OF THE NATIONAL RESEARCH FOUNDATION (NRF) - MINISTRY OF SCIENCE, ICT \& FUTURE PLANNING [NRF-2013M3C8A3078806]; NATIONAL RESEARCH FOUNDATION OF KOREA (NRF) GRANT - MINISTRY OF EDUCATION [NRF-2014R1A1A2A16049980]	THIS RESEARCH WAS SUPPORTED BY THE R\&D PROGRAM FOR SOCIETY OF THE NATIONAL RESEARCH FOUNDATION (NRF) FUNDED BY THE MINISTRY OF SCIENCE, ICT \& FUTURE PLANNING (NRF-2013M3C8A3078806). THIS WORK WAS ALSO SUPPORTED BY THE NATIONAL RESEARCH FOUNDATION OF KOREA (NRF) GRANT FUNDED BY THE MINISTRY OF EDUCATION (NRF-2014R1A1A2A16049980).
LI X;ZHANG W	ZERO-VALENT IRON; HEAVY-METALS; TRICHLOROETHENE HYDRODECHLORINATION; BIMETALLIC PARTICLES; SURFACE-CHEMISTRY; REMEDIATION; DECHLORINATION; REMOVAL; ELECTROCHEMISTRY; CONTAMINANTS		ZERO-VALENT IRON; HEAVY-METALS; TRICHLOROETHENE HYDRODECHLORINATION; BIMETALLIC PARTICLES; SURFACE-CHEMISTRY; REMEDIATION; DECHLORINATION; REMOVAL; ELECTROCHEMISTRY; CONTAMINANTS	ZHANG, WX (CORRESPONDING AUTHOR), LEHIGH UNIV, DEPT CIVIL \& ENVIRONM ENGN, CTR ADV MAT \& NANOTECHNOL, BETHLEHEM, PA 18015 USA.; LEHIGH UNIV, DEPT CIVIL \& ENVIRONM ENGN, CTR ADV MAT \& NANOTECHNOL, BETHLEHEM, PA 18015 USA.	J. PHYS. CHEM. C	APPLICATIONS OF NANOSCALE ZEROVALENT IRON (NZVI) FOR REMOVAL OF METAL CATIONS IN WATER ARE INVESTIGATED WITH THE RESULT THAT NZVI HAS MUCH LARGER CAPACITY THAN CONVENTIONAL MATERIALS FOR THE SEQUESTRATION OF ZN(II), CD(II), PB(II), NI(II), CU(II), AND AG(I). CHARACTERIZATIONS WITH HIGH-RESOLUTION X-RAY PHOTOELECTRON SPECTROSCOPY (HR-XPS) CONFIRM THAT THE IRON NANOPARTICLES HAVE A CORE-SHELL STRUC…		ZHANG, WX (CORRESPONDING AUTHOR), LEHIGH UNIV, DEPT CIVIL \& ENVIRONM ENGN, CTR ADV MAT \& NANOTECHNOL, BETHLEHEM, PA 18015 USA	10.1021/jp0702189		1932-7447	JOURNAL OF PHYSICAL CHEMISTRY C	ENGLISH	539	19	6939-6946			AMER CHEMICAL SOC	ISI	SEQUESTRATION OF METAL CATIONS WITH ZEROVALENT IRON NANOPARTICLES - A STUDY WITH HIGH RESOLUTION X-RAY PHOTOELECTRON SPECTROSCOPY (HR-XPS)	ARTICLE		111	2007	LI XIAO-QIN;ZHANG WEI-XIAN	J PHYS CHEM C	Applications of nanoscale zerovalent iron (nZVI) for removal of metal cations in water are investigated with the result that nZVI has much larger capacity than conventional materials for the sequestration of Zn(II), Cd(II), Pb(II), Ni(II), Cu(II), and Ag(I). Characterizations with high-resolution X-ray photoelectron spectroscopy (HR-XPS) confirm that the iron nanoparticles have a core-shell struc…	Sequestration of metal cations with zerovalent iron nanoparticles - A study with high resolution X-ray photoelectron spectroscopy (HR-XPS)		none	LEHIGH UNIV;LEHIGH UNIV	LEHIGH UNIV		LI X, 2007, J PHYS CHEM C	LI X, 2007, J PHYS CHEM C	1155 16TH ST, NW, WASHINGTON, DC 20036 USA	LEHIGH UNIVERSITY		WEZ3@LEHIGH.EDU		2025-11-07	165XR						MAY 17
FARRUKH A;AKRAM A;GHAFFAR A;HANIF S;HAMID A;DURAN H;YAMEEN B	MAGNETIC NANOPARTICLES; POLYMER BRUSHES; DITHIOCARBAMATE; MERCURY; ADSORBENT; IRON-OXIDE NANOPARTICLES; HEAVY-METALS; ACTIVATED CARBON; REMOVAL; ADSORPTION; EQUILIBRIUM; SILICA; PARTICLES	MAGNETIC NANOPARTICLES; POLYMER BRUSHES; DITHIOCARBAMATE; MERCURY; ADSORBENT	IRON-OXIDE NANOPARTICLES; HEAVY-METALS; ACTIVATED CARBON; REMOVAL; ADSORPTION; MERCURY; EQUILIBRIUM; SILICA; PARTICLES; ADSORBENT	YAMEEN, B (CORRESPONDING AUTHOR), LAHORE UNIV MANAGEMENT SCI, SCH SCI \& ENGN, DEPT CHEM, LAHORE 54792, PAKISTAN.; FARRUKH, ALEEZA; YAMEEN, BASIT, LAHORE UNIV MANAGEMENT SCI, SCH SCI \& ENGN, DEPT CHEM, LAHORE 54792, PAKISTAN.; DURAN, HATICE, TOBB UNIV ECON \& TECHNOL, DEPT MAT SCI \& NANOTECHNOL ENGN, TR-06560 ANKARA, TURKEY.; AKRAM, ATTIA; GHAFFAR, ABDUL, UNIV ENGN \& TECHNOL, DEPT CHEM, LAHORE…	ACS APPL. MATER. INTERFACES	HIGHLY EFFICIENT REMOVAL OF MERCURY(II) IONS (HG-II) FROM WATER HAS BEEN REPORTED BY EMPLOYING POLYMER-BRUSH-FUNCTIONALIZED MAGNETIC NANOPARTICLES (MNPS). SURFACE-INITIATED CONVENTIONAL RADICAL POLYMERIZATION (SI-CRP) WAS USED TO GROW POLY(2-AMINOETHYL METHACRYLATE HYDROCHLORIDE) (POLY-AEMA CENTER DOT HCL) POLYMER CHAINS ON MAGNETITE NANOPARTICLES (FE3O4), FOLLOWED BY THE TRANSFORMATION OF PENDAN…		YAMEEN, B (CORRESPONDING AUTHOR), LAHORE UNIV MANAGEMENT SCI, SCH SCI \& ENGN, DEPT CHEM, LAHORE 54792, PAKISTAN	10.1021/am400427n		1944-8244	ACS APPLIED MATERIALS \& INTERFACES	ENGLISH	116	9	3784-3793			AMER CHEMICAL SOC	ISI	DESIGN OF POLYMER-BRUSH-GRAFTED MAGNETIC NANOPARTICLES FOR HIGHLY EFFICIENT WATER REMEDIATION	ARTICLE		5	2013	FARRUKH ALEEZA;AKRAM ATTIA;GHAFFAR ABDUL;HANIF SARA; HAMID ALMAS;DURAN HATICE;YAMEEN BASIT	ACS APPL MATER INTERFACES	Highly efficient removal of mercury(II) ions (Hg-II) from water has been reported by employing polymer-brush-functionalized magnetic nanoparticles (MNPs). Surface-initiated conventional radical polymerization (SI-cRP) was used to grow poly(2-aminoethyl methacrylate hydrochloride) (poly-AEMA center dot HCl) polymer chains on magnetite nanoparticles (Fe3O4), followed by the transformation of pendan…	Design of Polymer-Brush-Grafted Magnetic Nanoparticles for Highly Efficient Water Remediation	magnetic nanoparticles; polymer brushes; dithiocarbamate; mercury; adsorbent	none	LAHORE UNIV MANAGEMENT SCI;LAHORE UNIV MANAGEMENT SCI;TOBB UNIV ECON AND TECHNOL;UNIV ENGN AND TECHNOL;KINNAIRD COLL WOMEN	LAHORE UNIV MANAGEMENT SCI		FARRUKH A, 2013, ACS APPL MATER INTERFACES	FARRUKH A, 2013, ACS APPL MATER INTERFACES	1155 16TH ST, NW, WASHINGTON, DC 20036 USA	LAHORE UNIVERSITY OF MANAGEMENT SCIENCES; TOBB EKONOMI VE TEKNOLOJI UNIVERSITY; UNIVERSITY OF ENGINEERING \& TECHNOLOGY LAHORE		BASITYAMEEN@LUMS.EDU.PK		2025-11-07	143AQ	1944-8252			HEC; LUMS	B.Y. ACKNOWLEDGES FINANCIAL SUPPORT FROM HEC AND A START-UP GRANT FROM LUMS. H.D. AND B.Y. THANK UNAM, BILKENT UNIVERSITY FOR TECHNICAL SUPPORT FOR XPS, PPMS, TEM, AND TGA ANALYSIS.	MAY 8
WIATROWSKI H;DAS S;KUKKADAPU R;ILTON ;EUGENE S E;BARKAY T;YEE N	SULFATE-REDUCING BACTERIA; MERCURY(II) SORPTION; NEW-JERSEY; ADSORPTION; SURFACE; SOILS; TRANSPORT; CHLORIDE; SYSTEM; CHARGE		SULFATE-REDUCING BACTERIA; MERCURY(II) SORPTION; NEW-JERSEY; ADSORPTION; SURFACE; SOILS; TRANSPORT; CHLORIDE; SYSTEM; CHARGE	YEE, N (CORRESPONDING AUTHOR), RUTGERS STATE UNIV, DEPT ENVIRONM SCI, NEW BRUNSWICK, NJ 08903 USA.; DAS, SOUMYA; YEE, NATHAN, RUTGERS STATE UNIV, DEPT ENVIRONM SCI, NEW BRUNSWICK, NJ 08903 USA.; WIATROWSKI, HEATHER A.; BARKAY, TAMAR, RUTGERS STATE UNIV, DEPT BIOCHEM \& MICROBIOL, NEW BRUNSWICK, NJ 08903 USA.; KUKKADAPU, RAVI; ILTON, EUGENE S., PACIFIC NW NATL LAB, RICHLAND, WA 99352 USA.	ENVIRON. SCI. TECHNOL.	MERCURY (HG) IS A HIGHLY TOXIC ELEMENT AND ITS CONTAMINATION OF GROUNDWATER PRESENTS A SIGNIFICANT THREAT TO TERRESTRIAL ECOSYSTEMS. UNDERSTANDING THE GEOCHEMICAL PROCESSES THAT MEDIATE MERCURY TRANSFORMATIONS IN THE SUBSURFACE IS NECESSARY TO PREDICT ITS FATE AND TRANSPORT. IN THIS STUDY, WE INVESTIGATED THE REDOX TRANSFORMATION OF MERCURIC HG (HG[II]) IN THE PRESENCE OF THE FE(II)/FE(III) MIXED…		YEE, N (CORRESPONDING AUTHOR), RUTGERS STATE UNIV, DEPT ENVIRONM SCI, NEW BRUNSWICK, NJ 08903 USA	10.1021/es9003608		0013-936X	ENVIRONMENTAL SCIENCE \& TECHNOLOGY	ENGLISH	140	14	5307-5313			AMER CHEMICAL SOC	ISI	REDUCTION OF HG(II) TO HG(O) BY MAGNETITE	ARTICLE		43	2009	WIATROWSKI HEATHER A;DAS SOUMYA;KUKKADAPU RAVI;ILTON; EUGENE S;BARKAY TAMAR;YEE NATHAN	ENVIRON SCI TECHNOL	Mercury (Hg) is a highly toxic element and its contamination of groundwater presents a significant threat to terrestrial ecosystems. Understanding the geochemical processes that mediate mercury transformations in the subsurface is necessary to predict its fate and transport. In this study, we investigated the redox transformation of mercuric Hg (Hg[II]) in the presence of the Fe(II)/Fe(III) mixed…	Reduction of Hg(II) to Hg(O) by Magnetite		none	RUTGERS STATE UNIV;RUTGERS STATE UNIV;RUTGERS STATE UNIV;PACIFIC NW NATL LAB	RUTGERS STATE UNIV		WIATROWSKI H, 2009, ENVIRON SCI TECHNOL	WIATROWSKI H, 2009, ENVIRON SCI TECHNOL	1155 16TH ST, NW, WASHINGTON, DC 20036 USA	RUTGERS UNIVERSITY SYSTEM; RUTGERS UNIVERSITY NEW BRUNSWICK; RUTGERS UNIVERSITY SYSTEM; RUTGERS UNIVERSITY NEW BRUNSWICK; UNITED STATES DEPARTMENT OF ENERGY (DOE); PACIFIC NORTHWEST NATIONAL LABORATORY		NYEE@ENVSCI.RUTGERS.EDU		2025-11-07	472NE	1520-5851					JUL 15
LI R;LIU L;YANG F	ADSORPTION; HG(II); MAGNETIC POLYANILINE COMPOSITE; REDUCED GRAPHENE; OXIDE; WASTE-WATER; MERCURY; ACID; CR(VI)	ADSORPTION; HG(II); MAGNETIC POLYANILINE COMPOSITE; REDUCED GRAPHENE; OXIDE	WASTE-WATER; MERCURY; ACID; ADSORPTION; CR(VI)	LIU, LF (CORRESPONDING AUTHOR), SCH ENVIRONM SCI \& TECHNOL, MOE, KEY LAB IND ECOL \& ENVIRONM ENGN, DALIAN 116024, PEOPLES R CHINA.; LI, RENJIE; LIU, LIFEN; YANG, FENGLIN, SCH ENVIRONM SCI \& TECHNOL, MOE, KEY LAB IND ECOL \& ENVIRONM ENGN, DALIAN 116024, PEOPLES R CHINA.; LIU, LIFEN, DALIAN UNIV TECHNOL, SCH FOOD \& ENVIRONM, PANJIN, PEOPLES R CHINA.	WATER SCI. TECHNOL.	TO EASE THE ADSORBENT RECOVERY AND TO INCREASE THE ADSORPTION CAPACITY OF POLYANILINE (PANI), ANILINE WAS POLYMERIZED IN THE PRESENCE OF A SOLVOTHERMALLY PREPARED NANO-COMPOSITE OF REDUCED GRAPHENE OXIDE AND FE3O4 (RGO/FE3O4). THE POLYANILINE WAS FORMED ALONG THE RGO/FE3O4 COMPOSITE IN TRANSMISSION ELECTRON MICROSCOPE (TEM). THE THUS FORMED PANI/RGO/FE3O4 ADSORBENT WAS TESTED AND APPLIED IN REMOV…		LIU, LF (CORRESPONDING AUTHOR), SCH ENVIRONM SCI \& TECHNOL, MOE, KEY LAB IND ECOL \& ENVIRONM ENGN, DALIAN 116024, PEOPLES R CHINA	10.2166/wst.2015.361		0273-1223	WATER SCIENCE AND TECHNOLOGY	ENGLISH	20	11	2062-2070			IWA PUBLISHING	ISI	POLYANILINE/REDUCED GRAPHENE OXIDE/FE3O4 NANO-COMPOSITE FOR AQUEOUS HG(II) REMOVAL	ARTICLE		72	2015	LI RENJIE;LIU LIFEN;YANG FENGLIN	WATER SCI TECHNOL	To ease the adsorbent recovery and to increase the adsorption capacity of polyaniline (PANI), aniline was polymerized in the presence of a solvothermally prepared nano-composite of reduced graphene oxide and Fe3O4 (RGO/Fe3O4). The polyaniline was formed along the RGO/Fe3O4 composite in transmission electron microscope (TEM). The thus formed PANI/RGO/Fe3O4 adsorbent was tested and applied in remov…	Polyaniline/reduced graphene oxide/Fe3O4 nano-composite for aqueous Hg(II) removal	adsorption; Hg(II); magnetic polyaniline composite; reduced graphene; oxide	none	SCH ENVIRONM SCI AND TECHNOL;SCH ENVIRONM SCI AND TECHNOL;DALIAN UNIV TECHNOL	SCH ENVIRONM SCI AND TECHNOL		LI R, 2015, WATER SCI TECHNOL	LI R, 2015, WATER SCI TECHNOL	ALLIANCE HOUSE, 12 CAXTON ST, LONDON SW1H0QS, ENGLAND	DALIAN UNIVERSITY OF TECHNOLOGY		LIFENLIU@DLUT.EDU.CN		2025-11-07	DJ6AL	1996-9732			NATIONAL NATURAL SCIENCE FOUNDATION OF CHINA [21177018]; PROGRAM OF INTRODUCING TALENTS OF DISCIPLINE TO UNIVERSITIES [B13012]; BASIC RESEARCH PROJECT FROM DALIAN UNIVERSITY OF TECHNOLOGY [DUT14QY48]	THE FINANCIAL SUPPORT FROM THE NATIONAL NATURAL SCIENCE FOUNDATION OF CHINA (NO. 21177018), THE PROGRAM OF INTRODUCING TALENTS OF DISCIPLINE TO UNIVERSITIES (B13012) AND BASIC RESEARCH PROJECT FROM DALIAN UNIVERSITY OF TECHNOLOGY (DUT14QY48) IS GREATLY ACKNOWLEDGED.	DEC
VENKATESWARLU S;YOON M;KIM M	FE3O4; NANOCLUSTERS; DIHYDROLIPOIC ACID; ADSORPTION; HG(II) IONS; SELECTIVE REMOVAL; EFFICIENT REMOVAL; HIGHLY EFFICIENT; GRAPHENE OXIDE; MAGNETIC NANOPARTICLES; CATALYTIC-REDUCTION; METAL REMOVAL; MERCURY; IONS; WATER	FE3O4; NANOCLUSTERS; DIHYDROLIPOIC ACID; ADSORPTION; HG(II) IONS	SELECTIVE REMOVAL; EFFICIENT REMOVAL; HIGHLY EFFICIENT; GRAPHENE OXIDE; MAGNETIC NANOPARTICLES; CATALYTIC-REDUCTION; METAL REMOVAL; MERCURY; IONS; ADSORPTION; WATER	KIM, MJ (CORRESPONDING AUTHOR), GACHON UNIV, DEPT CHEM, SEONGNAM 1320, SOUTH KOREA.; YOON, M (CORRESPONDING AUTHOR), KYUNGPOOK NATL UNIV, DEPT CHEM, DAEGU 41566, SOUTH KOREA.; VENKATESWARLU, SADA; KIM, MYUNG JONG, GACHON UNIV, DEPT CHEM, SEONGNAM 1320, SOUTH KOREA.; YOON, MINYOUNG, KYUNGPOOK NATL UNIV, DEPT CHEM, DAEGU 41566, SOUTH KOREA.	CHEMOSPHERE	IN THE FIELD OF NANOTECHNOLOGY, NANOADSORBENTS HAVE EMERGED AS A POWERFUL TOOL FOR THE PURIFICATION OF CONTAMINATED AQUEOUS ENVIRONMENTS. AMONG THE VARIETY OF NANOADSORBENTS DEVELOPED SO FAR, MAGNETITE (FE3O4) NANOPARTICLES HAVE DRAWN PARTICULAR INTEREST BECAUSE OF THEIR QUICK SEPARATION, LOW COST, FLEXIBILITY, REPRODUCIBILITY, AND ENVIRONMENTALLY BENIGN NATURE. HEREIN, WE DESCRIBE A NEW STRATEGY…		KIM, MJ (CORRESPONDING AUTHOR), GACHON UNIV, DEPT CHEM, SEONGNAM 1320, SOUTH KOREA	10.1016/j.chemosphere.2021.131673		0045-6535	CHEMOSPHERE	ENGLISH	36	2				PERGAMON-ELSEVIER SCIENCE LTD	ISI	AN ENVIRONMENTALLY BENIGN SYNTHESIS OF FE3O4 NANOPARTICLES TO FE3O4 NANOCLUSTERS: RAPID SEPARATION AND REMOVAL OF HG(II) FROM AN AQUEOUS MEDIUM	ARTICLE		286	2022	VENKATESWARLU SADA;YOON MINYOUNG;KIM MYUNG JONG	CHEMOSPHERE	In the field of nanotechnology, nanoadsorbents have emerged as a powerful tool for the purification of contaminated aqueous environments. Among the variety of nanoadsorbents developed so far, magnetite (Fe3O4) nanoparticles have drawn particular interest because of their quick separation, low cost, flexibility, reproducibility, and environmentally benign nature. Herein, we describe a new strategy…	An environmentally benign synthesis of Fe3O4 nanoparticles to Fe3O4 nanoclusters: Rapid separation and removal of Hg(II) from an aqueous medium	Fe3O4; Nanoclusters; Dihydrolipoic acid; Adsorption; Hg(II) ions	none	GACHON UNIV;KYUNGPOOK NATL UNIV;GACHON UNIV;KYUNGPOOK NATL UNIV	GACHON UNIV		VENKATESWARLU S, 2022, CHEMOSPHERE	VENKATESWARLU S, 2022, CHEMOSPHERE	THE BOULEVARD, LANGFORD LANE, KIDLINGTON, OXFORD OX5 1GB, ENGLAND	GACHON UNIVERSITY; KYUNGPOOK NATIONAL UNIVERSITY (KNU)	131673	MYYOON@KNU.AC.KR MYUNGJONGKIM@GACHON.AC.KR		2025-11-07	WD0BR	1879-1298	AUG 2021		NATIONAL RESEARCH FOUNDATION OF KOREA (NRF) - MINISTRY OF SCIENCE AND ICT [NRF-2020R1C1C1012655]; NATIONAL RESEARCH FOUNDATION OF KOREA BY KOREAN GOVERNMENT (MSIT) [NRF-2020R1A2C1101561]; KOREA BASIC SCIENCE INSTITUTE GRANT (NATIONAL RESEARCH FACILITIES AND EQUIPMENT CENTER) [2020R1A6C101A184]	THIS WORK WAS SUPPORTED BY NATIONAL RESEARCH FOUNDATION OF KOREA (NRF) GRANT FUNDED BY MINISTRY OF SCIENCE AND ICT (NRF-2020R1C1C1012655). THIS WORK WAS SUPPORTED BY GRANTS FROM THE NATIONAL RESEARCH FOUNDATION OF KOREA (NRF-2020R1A2C1101561) BY KOREAN GOVERNMENT (MSIT) AND KOREA BASIC SCIENCE INSTITUTE GRANT (NATIONAL RESEARCH FACILITIES AND EQUIPMENT CENTER GRANT NO. 2020R1A6C101A184).	JAN
SHEN X;WANG Q;CHEN W;PANG Y	MERCURY(II) REMOVAL; CYSTEINE MODIFIED; FE3O4 NANOPARTICLES; MAGNETIC; SEPARATION; ADSORPTION; ADSORBENT; NANOMATERIAL; DENDRIMER; PB(II); NI(II); HG(II)	MERCURY(II) REMOVAL; CYSTEINE MODIFIED; FE3O4 NANOPARTICLES; MAGNETIC; SEPARATION	ADSORPTION; ADSORBENT; NANOMATERIAL; DENDRIMER; PB(II); NI(II); HG(II)	SHEN, XF (CORRESPONDING AUTHOR), JIANGNAN UNIV, SCH FOOD SCI \& TECHNOL, STATE KEY LAB FOOD SCI \& TECHNOL, WUXI 214122, PEOPLES R CHINA.; SHEN, XIAOFANG, BRIGHT DAIRY \& FOOD CO LTD, CTR TECHNOL, STATE KEY LAB DAIRY BIOTECHNOL, SHANGHAI 200436, PEOPLES R CHINA.; SHEN, XIAOFANG; WANG, QIN; CHEN, WENLING; PANG, YUEHONG, JIANGNAN UNIV, SCH FOOD SCI \& TECHNOL, STATE KEY LAB FOOD SCI \& TECHNOL, WUX…	APPL. SURF. SCI.	CYSTEINE FUNCTIONALIZED FE3O4 MAGNETIC NANOPARTICLES (CYS-FE3O4 MNPS) WERE PREPARED FACILELY FOR HG(II) REMOVAL FROM AQUEOUS SOLUTIONS. USING FE2+ AS PRECURSORS, AIR AS OXIDANT AND CYS AS PROTECTANT, THIS NOVEL MATERIAL WAS ONE-POT SYNTHESIS AT ROOM TEMPERATURE BY OXIDATION-PRECIPITATION METHOD WITH THE ASSISTANCE OF SONICATION. THE MNPS WERE CHARACTERIZED BY TEM, VSM, FTIR, X-RAY POWDER DIFFRACT…		SHEN, XF (CORRESPONDING AUTHOR), JIANGNAN UNIV, SCH FOOD SCI \& TECHNOL, STATE KEY LAB FOOD SCI \& TECHNOL, WUXI 214122, PEOPLES R CHINA	10.1016/j.apsusc.2014.09.033		0169-4332	APPLIED SURFACE SCIENCE	ENGLISH	82		1028-1034			ELSEVIER SCIENCE BV	ISI	ONE-STEP SYNTHESIS OF WATER-DISPERSIBLE CYSTEINE FUNCTIONALIZED MAGNETIC FE3O4 NANOPARTICLES FOR MERCURY(II) REMOVAL FROM AQUEOUS SOLUTIONS	ARTICLE		317	2014	SHEN XIAOFANG;WANG QIN;CHEN WENLING;PANG YUEHONG	APPL SURF SCI	Cysteine functionalized Fe3O4 magnetic nanoparticles (Cys-Fe3O4 MNPs) were prepared facilely for Hg(II) removal from aqueous solutions. Using Fe2+ as precursors, air as oxidant and Cys as protectant, this novel material was one-pot synthesis at room temperature by oxidation-precipitation method with the assistance of sonication. The MNPs were characterized by TEM, VSM, FTIR, X-ray powder diffract…	One-step synthesis of water-dispersible cysteine functionalized magnetic Fe3O4 nanoparticles for mercury(II) removal from aqueous solutions	Mercury(II) removal; Cysteine modified; Fe3O4 nanoparticles; Magnetic; separation	none	JIANGNAN UNIV;CTR TECHNOL;JIANGNAN UNIV	JIANGNAN UNIV		SHEN X, 2014, APPL SURF SCI	SHEN X, 2014, APPL SURF SCI	PO BOX 211, 1000 AE AMSTERDAM, NETHERLANDS	BRIGHT DAIRY \& FOOD CO LTD; JIANGNAN UNIVERSITY		XFSHEN@JIANGNAN.EDU.CN		2025-11-07	AW7RT	1873-5584			STATE KEY LABORATORY OF DAIRY BIOTECHNOLOGY, BRIGHT DAIRY FOOD CO. LTD. [SKLDB2013-03]; NATURAL SCIENCE FOUNDATION OF JIANGSU PROVINCE [BK2012107]; NATIONAL NATURAL SCIENCE FOUNDATION OF CHINA [21005032]	THIS WORK WAS SUPPORTED BY THE OPEN PROJECT PROGRAM OF STATE KEY LABORATORY OF DAIRY BIOTECHNOLOGY, BRIGHT DAIRY \& FOOD CO. LTD. (SKLDB2013-03), THE NATURAL SCIENCE FOUNDATION OF JIANGSU PROVINCE (BK2012107) AND THE NATIONAL NATURAL SCIENCE FOUNDATION OF CHINA (21005032).	OCT 30
SOBHANARDALCANI S;ZANDIPAK R;TAGHAVI L	ADSORPTION; MERCURY; MAGNETITE NANOPARTICLES; WASTEWATER; KINETICS; HEAVY-METAL IONS; REMOVAL; FE3O4-AT-SIO2; SEPARATION; GASES; WATER; RESIN	ADSORPTION; MERCURY; MAGNETITE NANOPARTICLES; WASTEWATER; KINETICS	HEAVY-METAL IONS; REMOVAL; FE3O4-AT-SIO2; SEPARATION; GASES; WATER; RESIN	SOBHANARDALCANI, S (CORRESPONDING AUTHOR), ISLAMIC AZAD UNIV, HAMEDAN BRANCH, COLL BASIC SCI, DEPT ENVIRONM, HAMADAN, IRAN.; SOBHANARDALCANI, SOHEIL, ISLAMIC AZAD UNIV, HAMEDAN BRANCH, COLL BASIC SCI, DEPT ENVIRONM, HAMADAN, IRAN.; ZANDIPAK, RAZIYEH, ISLAMIC AZAD UNIV, HAMEDAN BRANCH, YOUNG RESEARCHERS \& ELITE CLUB, HAMADAN, IRAN.; TAGHAVI, LOBAT, ISLAMIC AZAD UNIV, SCI \& RES BRANCH, COLL ENVIR…	ENVIRON. HEALTH ENG. MANAG.	BACKGROUND: THE RAPID INCREASE IN AGRICULTURAL AND INDUSTRIAL DEVELOPMENT HAS MADE HEAVY METAL POLLUTION A SERIOUS ENVIRONMENTAL PROBLEM AND PUBLIC HEALTH THREAT; THEREFORE, REMOVAL OF HEAVY METALS FROM WATER IS IMPORTANT. THE CURRENT STUDY PREPARED DNPH@SDS@FE3O4 NANOPARTICLES AS A NOVEL AND EFFECTIVE ADSORBENT FOR REMOVAL OF HG(II) IONS FROM AN AQUEOUS SOLUTION. METHODS: A SELECTIVE ADSORBENT F…		SOBHANARDALCANI, S (CORRESPONDING AUTHOR), ISLAMIC AZAD UNIV, HAMEDAN BRANCH, COLL BASIC SCI, DEPT ENVIRONM, HAMADAN, IRAN	10.15171/EHEM.2016.18		2423-3765	ENVIRONMENTAL HEALTH ENGINEERING AND MANAGEMENT JOURNAL	ENGLISH	6	4	183-189			KERMAN UNIV MEDICAL SCIENCES	ISI	SYNTHESIS OF 2,4-DINITROPHENYLHYDRAZINE LOADED SODIUM DODECYL SULFATE-COATED MAGNETITE NANOPARTICLES FOR ADSORPTION OF HG(II) IONS FROM AN AQUEOUS SOLUTION	ARTICLE		3	2016	SOBHANARDALCANI SOHEIL;ZANDIPAK RAZIYEH;TAGHAVI LOBAT	ENVIRON HEALTH ENG MANAG	Background: The rapid increase in agricultural and industrial development has made heavy metal pollution a serious environmental problem and public health threat; therefore, removal of heavy metals from water is important. The current study prepared DNPH@SDS@Fe3O4 nanoparticles as a novel and effective adsorbent for removal of Hg(II) ions from an aqueous solution. Methods: A selective adsorbent f…	Synthesis of 2,4-dinitrophenylhydrazine loaded sodium dodecyl sulfate-coated magnetite nanoparticles for adsorption of Hg(II) ions from an aqueous solution	Adsorption; Mercury; Magnetite nanoparticles; Wastewater; Kinetics	none	ISLAMIC AZAD UNIV;ISLAMIC AZAD UNIV;ISLAMIC AZAD UNIV;ISLAMIC AZAD UNIV	ISLAMIC AZAD UNIV		SOBHANARDALCANI S, 2016, ENVIRON HEALTH ENG MANAG	SOBHANARDALCANI S, 2016, ENVIRON HEALTH ENG MANAG	JAHAD BLVD, KERMAN, 7619813159, IRAN	ISLAMIC AZAD UNIVERSITY; ISLAMIC AZAD UNIVERSITY; ISLAMIC AZAD UNIVERSITY		S\_SOBHAN@IAUH.AC.IR		2025-11-07	VH8LW	2423-4311					FAL
SHAN C;MA Z;TONG M;NI J	MERCURY; ADSORPTION; MAGNETITE; IMIDAZOLE; SILICA; MAGNETIC NANOPARTICLE; HEAVY-METAL IONS; EFFICIENT REMOVAL; AQUEOUS-SOLUTIONS; HUMIC-ACID; SORPTION; ADSORBENT; RECOVERY	MERCURY; ADSORPTION; MAGNETITE; IMIDAZOLE; SILICA; MAGNETIC NANOPARTICLE	HEAVY-METAL IONS; EFFICIENT REMOVAL; AQUEOUS-SOLUTIONS; HUMIC-ACID; MERCURY; ADSORPTION; SORPTION; IMIDAZOLE; ADSORBENT; RECOVERY	TONG, MP (CORRESPONDING AUTHOR), PEKING UNIV, COLL ENVIRONM SCI \& ENGN, MINIST EDUC, KEY LAB WATER \& SEDIMENT SCI, BEIJING 100871, PEOPLES R CHINA.; SHAN, CHAO; MA, ZHIYAO; TONG, MEIPING; NI, JINREN, PEKING UNIV, COLL ENVIRONM SCI \& ENGN, MINIST EDUC, KEY LAB WATER \& SEDIMENT SCI, BEIJING 100871, PEOPLES R CHINA.	WATER RES.	FE3O4@SIO2 MAGNETIC NANOPARTICLES MODIFIED BY GRAFTING POLY(1-VINYLIMIDAZOLE) OLIGOMER (FSPV) WAS FABRICATED AS A NOVEL ADSORBENT TO REMOVE HG(II) FROM WATER. FOURIER TRANSFORM INFRA-RED SPECTROSCOPY CONFIRMED THE SUCCESSFUL GRAFTING OF OLIGOMER, AND THERMOGRAVIMETRIC ANALYSIS SHOWED FSPV HAD A HIGH GRAFTING YIELD WITH ORGANIC CONTENT OF 22.8\%. TRANSMISSION ELECTRON MICROSCOPY IMAGE DISPLAYED TH…		TONG, MP (CORRESPONDING AUTHOR), PEKING UNIV, COLL ENVIRONM SCI \& ENGN, MINIST EDUC, KEY LAB WATER \& SEDIMENT SCI, BEIJING 100871, PEOPLES R CHINA	10.1016/j.watres.2014.11.030		0043-1354	WATER RESEARCH	ENGLISH	169		252-260			PERGAMON-ELSEVIER SCIENCE LTD	ISI	REMOVAL OF HG(II) BY POLY(1-VINYLIMIDAZOLE)-GRAFTED FE3O4@SIO2 MAGNETIC NANOPARTICLES	ARTICLE		69	2015	SHAN CHAO;MA ZHIYAO;TONG MEIPING;NI JINREN	WATER RES	Fe3O4@SiO2 magnetic nanoparticles modified by grafting poly(1-vinylimidazole) oligomer (FSPV) was fabricated as a novel adsorbent to remove Hg(II) from water. Fourier transform infra-red spectroscopy confirmed the successful grafting of oligomer, and thermogravimetric analysis showed FSPV had a high grafting yield with organic content of 22.8\%. Transmission electron microscopy image displayed th…	Removal of Hg(II) by poly(1-vinylimidazole)-grafted Fe3O4@SiO2 magnetic nanoparticles	Mercury; Adsorption; Magnetite; Imidazole; Silica; Magnetic nanoparticle	none	PEKING UNIV;PEKING UNIV	PEKING UNIV		SHAN C, 2015, WATER RES	SHAN C, 2015, WATER RES	THE BOULEVARD, LANGFORD LANE, KIDLINGTON, OXFORD OX5 1GB, ENGLAND	PEKING UNIVERSITY		TONGMEIPING@PKU.EDU.CN		2025-11-07	CB3BQ				NATIONAL NATURAL SCIENCE FOUNDATION OF CHINA [21377006]; PROGRAM FOR NEW CENTURY EXCELLENT TALENTS IN UNIVERSITY [NCET-13-0010]	THIS WORK WAS SUPPORTED BY THE NATIONAL NATURAL SCIENCE FOUNDATION OF CHINA UNDER GRANT NO. 21377006 AND THE PROGRAM FOR NEW CENTURY EXCELLENT TALENTS IN UNIVERSITY UNDER GRANT NO. NCET-13-0010.	FEB 1
HUANG Y;PEDDI P;TANG C;ZENG H;TENG X	WASTEWATER TREATMENT; HEAVY METAL REMOVAL; HYBRID ZERO-VALENT IRON; MAGNETITE; SELENIUM; MERCURY; NITRATE; AQUEOUS-SOLUTION; REDUCTION; SELENATE; IMMOBILIZATION; CONTAMINANTS; GROUNDWATER; MOLYBDATE; PHOSPHATE	WASTEWATER TREATMENT; HEAVY METAL REMOVAL; HYBRID ZERO-VALENT IRON; MAGNETITE; SELENIUM; MERCURY; NITRATE	AQUEOUS-SOLUTION; REDUCTION; SELENATE; IMMOBILIZATION; CONTAMINANTS; GROUNDWATER; MOLYBDATE; PHOSPHATE; SELENIUM	HUANG, YH (CORRESPONDING AUTHOR), TEXAS A\&M UNIV, DEPT BIOL \& AGR ENGN, TAMU 2117, COLLEGE STN, TX 77843 USA.; HUANG, YONG H.; PEDDI, PHANI K.; TANG, CILAI; ZENG, HUI, TEXAS A\&M UNIV, DEPT BIOL \& AGR ENGN, COLLEGE STN, TX 77843 USA.; TENG, XINJUN, SOUTHERN CO, BIRMINGHAM, AL 35291 USA.	SEP. PURIF. TECHNOL.	IN THIS PAPER, WE PRESENT AND DISCUSS THE RESULTS FROM THE FIRST FIELD DEMONSTRATION OF THE HYBRID ZERO-VALENT IRON (HZVI) TECHNOLOGY FOR REMOVING SELENIUM (SE), MERCURY (HG), AND NITRATE FROM THE FLUE-GAS-DESULFURIZATION (FGD) WASTEWATER OF A COAL-FIRED POWER PLANT. BY HYBRIDIZING ZERO-VALENT IRON WITH MAGNETITE AND FE(II) SPECIES, THE HZVI TECHNOLOGY CREATES A SELF-SUSTAINING HIGHLY-REACTIVE MI…		HUANG, YH (CORRESPONDING AUTHOR), TEXAS A\&M UNIV, DEPT BIOL \& AGR ENGN, TAMU 2117, COLLEGE STN, TX 77843 USA	10.1016/j.seppur.2013.07.009		1383-5866	SEPARATION AND PURIFICATION TECHNOLOGY	ENGLISH	89		690-698			ELSEVIER	ISI	HYBRID ZERO-VALENT IRON PROCESS FOR REMOVING HEAVY METALS AND NITRATE FROM FLUE-GAS-DESULFURIZATION WASTEWATER	ARTICLE		118	2013	HUANG YONG H;PEDDI PHANI K;TANG CILAI;ZENG HUI; TENG XINJUN	SEP PURIF TECHNOL	In this paper, we present and discuss the results from the first field demonstration of the hybrid zero-valent iron (hZVI) technology for removing selenium (Se), mercury (Hg), and nitrate from the flue-gas-desulfurization (FGD) wastewater of a coal-fired power plant. By hybridizing zero-valent iron with magnetite and Fe(II) species, the hZVI technology creates a self-sustaining highly-reactive mi…	Hybrid zero-valent iron process for removing heavy metals and nitrate from flue-gas-desulfurization wastewater	Wastewater treatment; Heavy metal removal; Hybrid zero-valent iron; Magnetite; Selenium; Mercury; Nitrate	none	TEXAS AANDM UNIV;TEXAS AANDM UNIV	TEXAS AANDM UNIV		HUANG Y, 2013, SEP PURIF TECHNOL	HUANG Y, 2013, SEP PURIF TECHNOL	RADARWEG 29, 1043 NX AMSTERDAM, NETHERLANDS	TEXAS A\&M UNIVERSITY SYSTEM; TEXAS A\&M UNIVERSITY COLLEGE STATION		YHUANG@TAMU.EDU		2025-11-07	252HA	1873-3794			TEXAS AM UNIVERSITY; TEXAS AGRILIFE RESEARCH; SOUTHERN COMPANY	THIS RESEARCH WAS FUNDED IN PART BY TEXAS A\&M UNIVERSITY AND TEXAS AGRILIFE RESEARCH. WE THANK SOUTHERN COMPANY FOR HOSTING THE TEST AT ONE OF ITS POWER FACILITIES AND PROVIDING FUND FOR THE FIELD TEST. WE THANK DR. YOUJUN DENG OF SOIL AND CROP SCIENCE AT TEXAS A\&M UNIVERSITY FOR HIS ASSISTANCE IN XRD ANALYSIS. WE ALSO THANK MATERIAL CHARACTERIZATION FACILITY AT TEXAS A\&M UNIVERSITY FOR THE AS…	OCT 30
BABU C;PALANISAMY B;SUNDARAVEL B;SHANTHI K;MURUGESAN V	REDUCED GRAPHENE OXIDE; MAGNETITE; ADSORPTION; ARSENIC; MERCURY; HIGHLY EFFICIENT REMOVAL; ONE-STEP SYNTHESIS; AQUEOUS-SOLUTION; MAGNETIC; SEPARATION; NANOPARTICLES; HG(II); WATER; IONS; COMPOSITES; FLUORIDE	REDUCED GRAPHENE OXIDE; MAGNETITE; ADSORPTION; ARSENIC; MERCURY	HIGHLY EFFICIENT REMOVAL; ONE-STEP SYNTHESIS; AQUEOUS-SOLUTION; MAGNETIC; SEPARATION; NANOPARTICLES; HG(II); WATER; IONS; COMPOSITES; FLUORIDE	MURUGESAN, V (CORRESPONDING AUTHOR), ANNA UNIV, DEPT CHEM, MADRAS 600025, TAMIL NADU, INDIA.; BABU, C. M.; PALANISAMY, B.; SUNDARAVEL, B.; SHANTHI, K.; MURUGESAN, V., ANNA UNIV, DEPT CHEM, MADRAS 600025, TAMIL NADU, INDIA.	SCI. ADV. MATER.	GRAPHENE OXIDE WAS SYNTHESIZED BY HUMMERS METHOD AND THEN REDUCED WITH HYDRAZINE HYDRATE TO OBTAIN REDUCED GRAPHENE OXIDE. DIHALOGEN CROSSLINKED FE3O4 CORE SHELL NANOPARTICLES (DCSNS) WERE SYNTHESIZED BY CROSSLINKING AMINE FUNCTIONALIZED FE3O4@SIO2 CORE-SHELL NANOPARTICLES WITH 1,2-BROMOCHLOROETHANE. THESE NANOPARTICLES WERE THEN LOADED ON TO THE REDUCED GRAPHENE OXIDE TO OBTAIN REDUCED GRAPHENE …		MURUGESAN, V (CORRESPONDING AUTHOR), ANNA UNIV, DEPT CHEM, MADRAS 600025, TAMIL NADU, INDIA	10.1166/sam.2015.1893		1947-2935	SCIENCE OF ADVANCED MATERIALS	ENGLISH	13	4	794-805			AMER SCIENTIFIC PUBLISHERS	ISI	DIHALOGEN CROSS LINKED FE3O4-REDUCED GRAPHENE OXIDE NANOCOMPOSITES FOR ARSENIC AND MERCURY ADSORPTION	ARTICLE		7	2015	BABU C M;PALANISAMY B;SUNDARAVEL B;SHANTHI K; MURUGESAN V	SCI ADV MATER	Graphene oxide was synthesized by Hummers method and then reduced with hydrazine hydrate to obtain reduced graphene oxide. Dihalogen crosslinked Fe3O4 core shell nanoparticles (DCSNs) were synthesized by crosslinking amine functionalized Fe3O4@SiO2 core-shell nanoparticles with 1,2-bromochloroethane. These nanoparticles were then loaded on to the reduced graphene oxide to obtain reduced graphene …	Dihalogen Cross linked Fe3O4-Reduced Graphene Oxide Nanocomposites for Arsenic and Mercury Adsorption	Reduced Graphene Oxide; Magnetite; Adsorption; Arsenic; Mercury	none	ANNA UNIV;ANNA UNIV	ANNA UNIV		BABU C, 2015, SCI ADV MATER	BABU C, 2015, SCI ADV MATER	26650 THE OLD RD, STE 208, VALENCIA, CA 91381-0751 USA	ANNA UNIVERSITY; ANNA UNIVERSITY CHENNAI		V\_MURUGU@HOTMAIL.COM		2025-11-07	CA8BF	1947-2943			UNIVERSITY GRANTS COMMISSION (UGC), NEW DELHI; UGC	THE AUTHORS GRATEFULLY ACKNOWLEDGE THE UNIVERSITY GRANTS COMMISSION (UGC), NEW DELHI, FOR LIBERAL FUNDING IN THE SECOND PHASE OF THE CENTRE WITH POTENTIAL FOR EXCELLENCE IN ENVIRONMENTAL SCIENCES (CPEES) IN ANNA UNIVERSITY. TWO OF THE AUTHORS, C. M. BABU AND B. PALANISAMY ARE ALSO THANKFUL TO UGC FOR THE AWARD OF JRF IN CPEES SCHEME.	APR
SANCHEZ-MORENO H;GARCIA-RODRIGUEZ L;RECALDE-MORENO ;CELSO C	<ITALIC>HG ADSORPTION</ITALIC>; IMPREGNATION; NANOPARTICLES; NATURAL; FIBERS; MERCURY; MINING WASTEWATER TREATMENT; HEAVY-METAL IONS; REMOVAL; ADSORPTION; HG(II)	<ITALIC>HG ADSORPTION</ITALIC>; IMPREGNATION; NANOPARTICLES; NATURAL; FIBERS; MERCURY; MINING WASTEWATER TREATMENT	HEAVY-METAL IONS; REMOVAL; ADSORPTION; HG(II)	GARCÍA-RODRÍGUEZ, L (CORRESPONDING AUTHOR), UNIV SEVILLE, ESCUELA TECN SUPER INGN, DEPT INGN ENERGET, CAMINO DESCUBRIMIENTOS S-N, SEVILLE 41092, SPAIN.; SANCHEZ-MORENO, HUGO; RECALDE-MORENO, CELSO, ESCUELA SUPER POLITECN CHIMBORAZO ESPOCH, FAC CIENCIAS, GRP INVEST ENERGIAS ALTERNAT \& AMBIENTE, PANAMERICANA KM 1 12, CHIMBORAZO EC060155, ECUADOR.; GARCIA-RODRIGUEZ, LOURDES, UNIV SEVILLE, ESCUELA T…	ADSORPT.-J. INT. ADSORPT. SOC.	HIGH MERCURY LEVELS FROM INDUSTRIAL AND NATURAL SOURCES NECESSITATE EFFECTIVE WATER MERCURY REMOVAL METHODS OWING TO HUMAN AND ECOSYSTEM TOXICITY RISKS. THIS STUDY ADDRESSES THE ADSORPTION OF HG IONS ONTO MIXED-VALENT MAGNETITE NANOPARTICLES (MNPS) OWING TO THEIR HIGH SURFACE AREA, REACTIVITY, AND MAGNETIC RECOVERY ABILITY. THE ADSORPTION CAPACITY OF MNPS IS INFLUENCED BY THE MORPHOLOGICAL CHARAC…		GARCÍA-RODRÍGUEZ, L (CORRESPONDING AUTHOR), UNIV SEVILLE, ESCUELA TECN SUPER INGN, DEPT INGN ENERGET, CAMINO DESCUBRIMIENTOS S-N, SEVILLE 41092, SPAIN	10.1007/s10450-024-00577-1		0929-5607	ADSORPTION-JOURNAL OF THE INTERNATIONAL ADSORPTION SOCIETY	ENGLISH	5	1				SPRINGER	ISI	NATURAL CELLULOSE FIBERS (AGAVE AMERICANA L. ASPARAGACEAE) IMPREGNATED WITH MAGNETITE NANOPARTICLES AS A NOVEL ADSORBENT OF MERCURY (HG) IN AQUEOUS SOLUTIONS	ARTICLE		31	2025	SANCHEZ-MORENO HUGO;GARCIA-RODRIGUEZ LOURDES;RECALDE-MORENO; CELSO	ADSORPT-J INT ADSORPT SOC	High mercury levels from industrial and natural sources necessitate effective water mercury removal methods owing to human and ecosystem toxicity risks. This study addresses the adsorption of Hg ions onto mixed-valent magnetite nanoparticles (MNPs) owing to their high surface area, reactivity, and magnetic recovery ability. The adsorption capacity of MNPs is influenced by the morphological charac…	Natural cellulose fibers (Agave Americana L. ASPARAGACEAE) impregnated with magnetite nanoparticles as a novel adsorbent of mercury (Hg) in aqueous solutions	<italic>Hg adsorption</italic>; Impregnation; Nanoparticles; Natural; fibers; Mercury; Mining wastewater treatment	none	UNIV SEVILLE;FAC CIENCIAS;UNIV SEVILLE	UNIV SEVILLE		SANCHEZ-MORENO H, 2025, ADSORPT-J INT ADSORPT SOC	SANCHEZ-MORENO H, 2025, ADSORPT-J INT ADSORPT SOC	ONE NEW YORK PLAZA, SUITE 4600, NEW YORK, NY, UNITED STATES	UNIVERSITY OF SEVILLA	16			2025-11-07	O5L8V	1572-8757			H2020 MARIE SKLSTROK;ODOWSKA-CURIE ACTIONS [H2020-MSCA-RISE-2017, 823948, 01/11/2018- 30/04/2024]; EUROPEAN COMMISSION; RENEWABLE ENERGIES FOR WATER TREATMENT AND REUSE IN MINING INDUSTRIES; MARIE CURIE ACTIONS (MSCA) [823948] FUNDING SOURCE: MARIE CURIE ACTIONS (MSCA)	THE AUTHORS WISH TO THANK THE EUROPEAN COMMISSION FOR ITS FINANCIAL ASSISTANCE WITHIN THE FRAMEWORK OF THE REMIND PROJECT (H2020-MSCA-RISE-2017, GRANT AGREEMENT: 823948. 01/11/2018- 30/04/2024), ENTITLED ``RENEWABLE ENERGIES FOR WATER TREATMENT AND REUSE IN MINING INDUSTRIES''.	JAN
LI X;BROWN D;ZHANG W	BIOSOLIDS; METAL; NANOPARTICLE; IRON; WASTEWATER; ODOR; SULFIDE; ENVIRONMENT; EHS; PARTICLES; NANOPARTICLES; REMEDIATION	BIOSOLIDS; METAL; NANOPARTICLE; IRON; WASTEWATER; ODOR; SULFIDE; ENVIRONMENT; EHS	PARTICLES; NANOPARTICLES; REMEDIATION	ZHANG, WX (CORRESPONDING AUTHOR), LEHIGH UNIV, CTR ADV MAT \& NANOTECHNOL CIVIL \& ENVIRONM ENGN, 13 E PACKER AVE, BETHLEHEM, PA 18015 USA.; LEHIGH UNIV, CTR ADV MAT \& NANOTECHNOL CIVIL \& ENVIRONM ENGN, BETHLEHEM, PA 18015 USA.	J. NANOPART. RES.	BIOSOLIDS ARE THE TREATED ORGANIC RESIDUALS, ALSO KNOWN AS SLUDGE, THAT ARE GENERATED FROM DOMESTIC WASTEWATER TREATMENT PLANTS. ACCORDING TO THE USEPA, OVER 7 MILLIONS TONS (DRY WEIGHT) OF BIOSOLIDS ARE GENERATED EVERY YEAR IN THE US BY MORE THAN THE 16,000 WASTEWATER TREATMENT PLANTS AND A LARGE PORTION OF THESE BIOSOLIDS IS DISPOSED ON LAND. NUISANCE ODORS, THE POTENTIAL OF PATHOGEN TRANSMISSI…		ZHANG, WX (CORRESPONDING AUTHOR), LEHIGH UNIV, CTR ADV MAT \& NANOTECHNOL CIVIL \& ENVIRONM ENGN, 13 E PACKER AVE, BETHLEHEM, PA 18015 USA	10.1007/s11051-006-9187-1		1388-0764	JOURNAL OF NANOPARTICLE RESEARCH	ENGLISH	108	2	233-243			SPRINGER	ISI	STABILIZATION OF BIOSOLIDS WITH NANOSCALE ZERO-VALENT IRON (NZVI)	ARTICLE		9	2007	LI XIAO-QIN;BROWN DERICK G;ZHANG WEI-XIAN	J NANOPART RES	Biosolids are the treated organic residuals, also known as sludge, that are generated from domestic wastewater treatment plants. According to the USEPA, over 7 millions tons (dry weight) of biosolids are generated every year in the US by more than the 16,000 wastewater treatment plants and a large portion of these biosolids is disposed on land. Nuisance odors, the potential of pathogen transmissi…	Stabilization of biosolids with nanoscale zero-valent iron (nZVI)	biosolids; metal; nanoparticle; iron; wastewater; odor; sulfide; environment; EHS	none	LEHIGH UNIV;LEHIGH UNIV	LEHIGH UNIV		LI X, 2007, J NANOPART RES	LI X, 2007, J NANOPART RES	VAN GODEWIJCKSTRAAT 30, 3311 GZ DORDRECHT, NETHERLANDS	LEHIGH UNIVERSITY		WEZ3@LEHIGH.EDU		2025-11-07	145AE	1572-896X					APR
ZHANG Z;NIU Y;CHEN H;YANG Z;BAI L;XUE Z;YANG H	ONE-POT SEQUENTIAL SYNTHESIS METHOD; MAGNETIC FE3O4; AMINOPYRIDINE; ADSORPTION SELECTIVITY; MECHANISM; HEAVY-METAL IONS; EFFICIENT REMOVAL; PAMAM DENDRIMERS; ADSORPTION; MESOPOROUS SILICA; CHELATING RESINS; MERCURY REMOVAL; GRAPHENE OXIDE; FUEL ETHANOL; WASTE-WATER	ONE-POT SEQUENTIAL SYNTHESIS METHOD; MAGNETIC FE3O4; AMINOPYRIDINE; ADSORPTION SELECTIVITY; MECHANISM	HEAVY-METAL IONS; EFFICIENT REMOVAL; PAMAM DENDRIMERS; ADSORPTION; MECHANISM; MESOPOROUS SILICA; CHELATING RESINS; MERCURY REMOVAL; GRAPHENE OXIDE; FUEL ETHANOL; WASTE-WATER	NIU, YZ (CORRESPONDING AUTHOR), LUDONG UNIV, SCH CHEM \& MAT SCI, 186 HONG QI ZHONG LU, YANTAI 264025, PEOPLES R CHINA.; ZHANG, ZAIXIN; NIU, YUZHONG; CHEN, HOU; YANG, ZHENGLONG; BAI, LIANGJIU; XUE, ZHONGXIN; YANG, HUAWEI, LUDONG UNIV, SCH CHEM \& MAT SCI, 186 HONG QI ZHONG LU, YANTAI 264025, PEOPLES R CHINA.	ACS SUSTAIN. CHEM. ENG.	HEAVY METAL POLLUTION TO AQUEOUS MEDIA IS AN IMPORTANT ISSUE FOR ENVIRONMENTAL SUSTAINABILITY. A SIMPLE STRATEGY FOR THE SYNTHESIS OF AN EFFICIENT ADSORBENT IS STRONGLY DESIRED FOR WATER REMEDIATION. HEREIN, AMINOPYRIDINE FUNCTIONALIZED MAGNETIC FE3O4 (HO-FE3O4@ SIO2-AP) WITH EXCELLENT ADSORPTION CAPACITY AND SELECTIVITY WAS SYNTHESIZED BY A FEASIBLE ONE-POT SEQUENTIAL REACTION. AS A COMPARISON, …		NIU, YZ (CORRESPONDING AUTHOR), LUDONG UNIV, SCH CHEM \& MAT SCI, 186 HONG QI ZHONG LU, YANTAI 264025, PEOPLES R CHINA	10.1021/acssuschemeng.9b00471		2168-0485	ACS SUSTAINABLE CHEMISTRY \& ENGINEERING	ENGLISH	87	7	7324-7337			AMER CHEMICAL SOC	ISI	FEASIBLE ONE-POT SEQUENTIAL SYNTHESIS OF AMINOPYRIDINE FUNCTIONALIZED MAGNETIC FE3O4 HYBRIDS FOR ROBUST CAPTURE OF AQUEOUS HG(II) AND AG(I)	ARTICLE		7	2019	ZHANG ZAIXIN;NIU YUZHONG;CHEN HOU;YANG ZHENGLONG; BAI LIANGJIU;XUE ZHONGXIN;YANG HUAWEI	ACS SUSTAIN CHEM ENG	Heavy metal pollution to aqueous media is an important issue for environmental sustainability. A simple strategy for the synthesis of an efficient adsorbent is strongly desired for water remediation. Herein, aminopyridine functionalized magnetic Fe3O4 (HO-Fe3O4@ SiO2-AP) with excellent adsorption capacity and selectivity was synthesized by a feasible one-pot sequential reaction. As a comparison, …	Feasible One-Pot Sequential Synthesis of Aminopyridine Functionalized Magnetic Fe3O4 Hybrids for Robust Capture of Aqueous Hg(II) and Ag(I)	One-pot sequential synthesis method; Magnetic Fe3O4; Aminopyridine; Adsorption selectivity; Mechanism	none	LUDONG UNIV;LUDONG UNIV	LUDONG UNIV		ZHANG Z, 2019, ACS SUSTAIN CHEM ENG	ZHANG Z, 2019, ACS SUSTAIN CHEM ENG	1155 16TH ST, NW, WASHINGTON, DC 20036 USA	LUDONG UNIVERSITY		NIUYUZHONG@LDU.EDU.CN		2025-11-07	HR9EN				NATIONAL NATURAL SCIENCE FOUNDATION OF CHINA [21307053, 51673090]; NATURAL SCIENCE FOUNDATION OF SHANDONG PROVINCE [ZR2018MB039]; SCIENCE AND TECHNOLOGY RESEARCH PROGRAM OF YANTAI [2017ZH060]; KEY PROGRAM FOR BASIC RESEARCH OF NATURAL SCIENCE FOUNDATION OF SHANDONG PROVINCE [ZR2018ZC0946]	NATIONAL NATURAL SCIENCE FOUNDATION OF CHINA (21307053 AND 51673090), NATURAL SCIENCE FOUNDATION OF SHANDONG PROVINCE (ZR2018MB039), SCIENCE AND TECHNOLOGY RESEARCH PROGRAM OF YANTAI (2017ZH060), AND THE KEY PROGRAM FOR BASIC RESEARCH OF NATURAL SCIENCE FOUNDATION OF SHANDONG PROVINCE (ZR2018ZC0946) ARE GRATEFUL ACKNOWLEDGED.	APR 1
CASTANEDA-RAMIREZ A;ROJAS-GARCIA E;LOPEZ-MEDINA R;GARCIA-MARTINEZ D;NICOLAS-ANTUNEZ J;MAUBERT-FRANCO A	FE-BTC; FE2O4 @FE-BTC; HEAVY METAL IONS ADSORPTION; MAGNETITE; NANOPARTICLES; METAL IONS CONTAMINATED WATER; ORGANIC FRAMEWORKS; AQUEOUS-SOLUTION; EFFICIENT REMOVAL; ACTIVATED; CARBON; COPPER-ION; ADSORPTION; IRON; ISOTHERMS; MECHANISM; MEMBRANES	FE-BTC; FE2O4 @FE-BTC; HEAVY METAL IONS ADSORPTION; MAGNETITE; NANOPARTICLES; METAL IONS CONTAMINATED WATER	ORGANIC FRAMEWORKS; AQUEOUS-SOLUTION; EFFICIENT REMOVAL; ACTIVATED; CARBON; COPPER-ION; ADSORPTION; IRON; ISOTHERMS; MECHANISM; MEMBRANES	CASTANEDA-RAMIREZ, AA; MAUBERT-FRANCO, AM (CORRESPONDING AUTHOR), UNIV AUTONOMA METROPOLITANA AZCAPOTZALCO, DEPT CIENCIAS BASICAS, AVE SAN PABLO 180,COLL REYNOSA-TAMAULIPAS, MEXICO CITY 02200, MEXICO.; ROJAS-GARCIA, E (CORRESPONDING AUTHOR), UNIV AUTONOMA METROPOLITANA IZTAPALAPA, DEPT INGN PROC \& HIDRAUL, AREA INGN QUIM, AVE SAN RAFAEL ATLIXCO 186,COL VICENTINA, MEXICO CITY 09340, MEXICO.; CAST…	CATAL. TODAY	MAGNETITE NANOPARTICLES@FE-BTC COMPOSITE MATERIAL WAS SYNTHESIZED BY A SOLVOTHERMAL METHOD, WHERE MAGNETITE NANOPARTICLES WERE ADDED DURING THE SYNTHESIS AND WAS CHARACTERIZED BY DIFFERENT ANALYTICAL TECHNIQUES ANALYTICAL SUCH AS XRD, RAMAN AND FTIR SPECTROSCOPY, AND NITROGEN PHYSISORPTION AT 77 K. MAGNETITE NANOPARTICLES INTO FE-BTC COMPOSITE MATERIAL WAS USED IN THE ADSORPTION OF METALS IONS SU…		CASTANEDA-RAMIREZ, AA; MAUBERT-FRANCO, AM (CORRESPONDING AUTHOR), UNIV AUTONOMA METROPOLITANA AZCAPOTZALCO, DEPT CIENCIAS BASICAS, AVE SAN PABLO 180,COLL REYNOSA-TAMAULIPAS, MEXICO CITY 02200, MEXICO	10.1016/j.cattod.2021.11.007		0920-5861	CATALYSIS TODAY	ENGLISH	36		94-102			ELSEVIER	ISI	MAGNETITE NANOPARTICLES INTO FE-BTC MOF AS ADSORBENT MATERIAL FOR THE REMEDIATION OF METAL (CU(II), PB(II, AS(III) AND HG(II)) IONS-CONTAMINATED WATER	ARTICLE		394	2022	CASTANEDA-RAMIREZ A A;ROJAS-GARCIA E;LOPEZ-MEDINA R; GARCIA-MARTINEZ D C;NICOLAS-ANTUNEZ J;MAUBERT-FRANCO A M	CATAL TODAY	Magnetite nanoparticles@Fe-BTC composite material was synthesized by a solvothermal method, where magnetite nanoparticles were added during the synthesis and was characterized by different analytical techniques analytical such as XRD, Raman and FTIR spectroscopy, and nitrogen physisorption at 77 K. Magnetite nanoparticles into Fe-BTC composite material was used in the adsorption of metals ions su…	Magnetite nanoparticles into Fe-BTC MOF as adsorbent material for the remediation of metal (Cu(II), Pb(II, As(III) and Hg(II)) ions-contaminated water	Fe-BTC; Fe2O4 @Fe-BTC; Heavy metal ions adsorption; Magnetite; nanoparticles; Metal ions contaminated water	none	UNIV AUTONOMA METROPOLITANA AZCAPOTZALCO;UNIV AUTONOMA METROPOLITANA IZTAPALAPA;UNIV AUTONOMA METROPOLITANA AZCAPOTZALCO;UNIV AUTONOMA METROPOLITANA IZTAPALAPA;UNIV AUTONOMA METROPOLITANA AZCAPOTZALCO	NOTREPORTED;UNIV AUTONOMA METROPOLITANA AZCAPOTZALCO		CASTANEDA-RAMIREZ A, 2022, CATAL TODAY	CASTANEDA-RAMIREZ A, 2022, CATAL TODAY	RADARWEG 29, 1043 NX AMSTERDAM, NETHERLANDS	UNIVERSIDAD AUTONOMA METROPOLITANA - MEXICO; UNIVERSITY AUTONOMA METROPOLITANA AZCAPOTZALCO; UNIVERSIDAD AUTONOMA METROPOLITANA - MEXICO; UNIVERSIDAD AUTONOMA METROPOLITANA - MEXICO; UNIVERSITY AUTONOMA METROPOLITANA AZCAPOTZALCO		ING.CARAUAM@GMAIL.COM ERG@XANUM.UAM.MX RILOME@AZC.UAM.MX AMF@AZC.UAM.MX		2025-11-07	2B9QS	1873-4308	JUN 2022				JUL 1
KOKKINOS E;SIMEONIDIS K;ZOUBOULIS ;ANASTASIOS A;MITRAKAS M	KINETIC; FERRIC-MANGANESE OXYHYDROXIDES; SURFACE CHARGE; MERCURY; REMOVAL; ADSORPTION; SURFACE COMPLEXATION; ACTIVATED CARBON; SORPTION; NANOPARTICLES; HG(II); IONS; GOETHITE; RECOVERY; SORBENT	KINETIC; FERRIC-MANGANESE OXYHYDROXIDES; SURFACE CHARGE; MERCURY; REMOVAL; ADSORPTION	SURFACE COMPLEXATION; ACTIVATED CARBON; SORPTION; NANOPARTICLES; HG(II); IONS; ADSORPTION; GOETHITE; RECOVERY; SORBENT	MITRAKAS, M (CORRESPONDING AUTHOR), ARISTOTLE UNIV THESSALONIKI, DEPT CHEM ENGN, THESSALONIKI 54124, GREECE.; KOKKINOS, EVGENIOS; SIMEONIDIS, KONSTANTINOS; MITRAKAS, MANASSIS, ARISTOTLE UNIV THESSALONIKI, DEPT CHEM ENGN, THESSALONIKI 54124, GREECE.; ZOUBOULIS, ANASTASIOS, ARISTOTLE UNIV THESSALONIKI, DEPT CHEM, THESSALONIKI 54124, GREECE.	DESALIN. WATER TREAT.	IN THIS STUDY, SINGLE IRON OXYHYDROXIDES (FEOOH) AND BINARY IRON/MANGANESE (FEMNOOH) OXYHYDROXIDES WERE USED TO SERVE AS POTENTIAL MERCURY ADSORBENTS. THE SELECTION OF THE OPTIMUM ADSORBENT AND THE CORRESPONDING CONDITIONS OF THE SYNTHESIS WAS BASED NOT ONLY ON ITS MAXIMUM HG(II) ADSORPTION CAPACITY BUT ALSO ON ITS ABILITY TO ACHIEVE THE MERCURY HEALTH REGULATION LIMIT FOR DRINKING WATER IN NATIO…		MITRAKAS, M (CORRESPONDING AUTHOR), ARISTOTLE UNIV THESSALONIKI, DEPT CHEM ENGN, THESSALONIKI 54124, GREECE	10.1080/19443994.2014.934105		1944-3994	DESALINATION AND WATER TREATMENT	ENGLISH	19	8	2082-2090			DESALINATION PUBL	ISI	MERCURY REMOVAL FROM DRINKING WATER BY SINGLE IRON AND BINARY IRON-MANGANESE OXYHYDROXIDES	ARTICLE; PROCEEDINGS PAPER		54	2015	KOKKINOS EVGENIOS;SIMEONIDIS KONSTANTINOS;ZOUBOULIS; ANASTASIOS;MITRAKAS MANASSIS	DESALIN WATER TREAT	In this study, single iron oxyhydroxides (FeOOH) and binary iron/manganese (FeMnOOH) oxyhydroxides were used to serve as potential mercury adsorbents. The selection of the optimum adsorbent and the corresponding conditions of the synthesis was based not only on its maximum Hg(II) adsorption capacity but also on its ability to achieve the mercury health regulation limit for drinking water in Natio…	Mercury removal from drinking water by single iron and binary iron-manganese oxyhydroxides	Kinetic; Ferric-manganese oxyhydroxides; Surface charge; Mercury; removal; Adsorption	none	ARISTOTLE UNIV THESSALONIKI;ARISTOTLE UNIV THESSALONIKI;ARISTOTLE UNIV THESSALONIKI	ARISTOTLE UNIV THESSALONIKI		KOKKINOS E, 2015, DESALIN WATER TREAT	KOKKINOS E, 2015, DESALIN WATER TREAT	36 WALCOTT VALLEY DRIVE,, HOPKINTON, MA 01748 USA	ARISTOTLE UNIVERSITY OF THESSALONIKI; ARISTOTLE UNIVERSITY OF THESSALONIKI		KOKKINOSEVGENIOS@YAHOO.GR KSIME@PHYSICS.AUTH.GR ZOUBOULI@CHEM.AUTH.GR MANASIS@ENG.AUTH.GR		2025-11-07	CG6LC	1944-3986			EUROPEAN UNION [11SYN-8-206]	PROGRAM EPAN-II (OPC-II)/ESPA (NSRF): ``SYNERGASIA II'' PROJECT (MERCAP)-''ADVANCED MATERIALS FOR MERCURY CAPTURE'' (11SYN-8-206), CO-FINANCED BY THE EUROPEAN UNION AND THE GREEK STATE IS GRATEFULLY APPRECIATED.	MAY 22
WANG Z;WU D;WU G;YANG N;WU ;AIGUO A	RHODAMINE-6G; FE3O4; MERCURY ION; SORPTION; SENSOR; MERCURY IONS; HUMIC-ACID; FLUORESCENT; HG(II); SEPARATION; SILICA; NANOPARTICLES; RECOGNITION; CHEMOSENSOR	RHODAMINE-6G; FE3O4; MERCURY ION; SORPTION; SENSOR	MERCURY IONS; HUMIC-ACID; FLUORESCENT; HG(II); SEPARATION; SILICA; SENSOR; NANOPARTICLES; RECOGNITION; CHEMOSENSOR	WU, DY (CORRESPONDING AUTHOR), ANQING NORMAL COLL, ANHUI PROV LAB PHOTOELECT MAGNET FUNCT MAT, SCH CHEM \& CHEM ENGN, ANQING 246001, PEOPLES R CHINA.; WANG, ZHUQING; YANG, NINGNING; WU, AIGUO, CHINESE ACAD SCI, DIV FUNCT MAT \& NANO DEVICES, KEY LAB MAGNET MAT \& DEVICES, NIMTE, NINGBO 315201, ZHEJIANG, PEOPLES R CHINA.; WANG, ZHUQING; WU, DAYU; WU, GENHUA, ANQING NORMAL COLL, ANHUI PROV LAB PHOT…	J. HAZARD. MATER.	RHODAMINE HYDRAZIDE MODIFYING FE3O4 MICROSPHERES (FE3O4-R6G) WAS DEVELOPED FOR SELECTIVE DETECTION AND REMOVAL OF MERCURY ION FROM WATER. WITH A SATURATION MAGNETIZATION OF 74.2 EMU/G, THE FE3O4-R6G COULD BE SIMPLY RECOLLECTED FROM WATER WITH MAGNETIC SEPARATION WITHIN A FEW MINUTES. THE SELECTIVITY AND ADSORPTION ABILITY OF FE3O4-R6G FOR METAL CATIONS WERE STUDIED BY FLUOROPHOTOMETRY AND ATOMIC …		WU, DY (CORRESPONDING AUTHOR), ANQING NORMAL COLL, ANHUI PROV LAB PHOTOELECT MAGNET FUNCT MAT, SCH CHEM \& CHEM ENGN, ANQING 246001, PEOPLES R CHINA	10.1016/j.jhazmat.2012.10.050		0304-3894	JOURNAL OF HAZARDOUS MATERIALS	ENGLISH	70		621-627			ELSEVIER SCIENCE BV	ISI	MODIFYING FE3O4 MICROSPHERES WITH RHODAMINE HYDRAZIDE FOR SELECTIVE DETECTION AND REMOVAL OF HG2+ ION IN WATER	ARTICLE		244	2013	WANG ZHUQING;WU DAYU;WU GENHUA;YANG NINGNING;WU; AIGUO	J HAZARD MATER	Rhodamine hydrazide modifying Fe3O4 microspheres (Fe3O4-R6G) was developed for selective detection and removal of mercury ion from water. With a saturation magnetization of 74.2 emu/g, the Fe3O4-R6G could be simply recollected from water with magnetic separation within a few minutes. The selectivity and adsorption ability of Fe3O4-R6G for metal cations were studied by fluorophotometry and atomic …	Modifying Fe3O4 microspheres with rhodamine hydrazide for selective detection and removal of Hg2+ ion in water	Rhodamine-6G; Fe3O4; Mercury ion; Sorption; Sensor	none	ANQING NORMAL COLL;CHINESE ACAD SCI;ANQING NORMAL COLL	ANQING NORMAL COLL		WANG Z, 2013, J HAZARD MATER	WANG Z, 2013, J HAZARD MATER	PO BOX 211, 1000 AE AMSTERDAM, NETHERLANDS	CHINESE ACADEMY OF SCIENCES; ANQING NORMAL UNIVERSITY		WUDAYU\_NJU@YAHOO.COM.CN AIGUO@NIMTE.AC.CN		2025-11-07	090ST	1873-3336			NATURAL SCIENCE FOUNDATION OF CHINA [21001008, 21171008]; ANHUI PROVINCE OFFICE OF EDUCATION [2010SQRL109]; SCIENCE TECHNOLOGY DEPARTMENT OF ZHEJIANG PROVINCE [R5110230]; HUNDRED TALENTS OF CHINESE ACADEMY OF SCIENCES	WE GRATEFULLY ACKNOWLEDGE THE NATURAL SCIENCE FOUNDATION OF CHINA (GRANT 21001008 AND 21171008), ANHUI PROVINCE OFFICE OF EDUCATION (GRANT 2010SQRL109), SCIENCE TECHNOLOGY DEPARTMENT OF ZHEJIANG PROVINCE (GRANT R5110230) AND HUNDRED TALENTS OF CHINESE ACADEMY OF SCIENCES FOR FINANCIAL SUPPORT.	JAN 15
TAVARES D;LOPES C;DANIEL-DA-SILVA A;DUARTE A;TRINDADE T;PEREIRA E	MERCURY SORPTION; DITHIOCARBAMATE FUNCTIONALIZATION; SILICA; MAGNETITE; WATER TREATMENT; MAGNETITE PARTICLES; AQUEOUS-SOLUTION; HEAVY-METALS; REMOVAL; ADSORPTION; IONS; SORPTION; GASES; WATER; HG2+	MERCURY SORPTION; DITHIOCARBAMATE FUNCTIONALIZATION; SILICA; MAGNETITE; WATER TREATMENT	MAGNETITE PARTICLES; AQUEOUS-SOLUTION; HEAVY-METALS; REMOVAL; ADSORPTION; IONS; SORPTION; GASES; WATER; HG2+	LOPES, CB (CORRESPONDING AUTHOR), UNIV AVEIRO, DEPT CHEM, P-3810193 AVEIRO, PORTUGAL.; TAVARES, DANIELA S.; LOPES, CLAUDIA B.; DUARTE, ARMANDO C.; PEREIRA, EDUARDA, UNIV AVEIRO, DEPT CHEM, P-3810193 AVEIRO, PORTUGAL.; TAVARES, DANIELA S.; LOPES, CLAUDIA B.; DUARTE, ARMANDO C.; PEREIRA, EDUARDA, UNIV AVEIRO, CESAM, P-3810193 AVEIRO, PORTUGAL.; DANIEL-DA-SILVA, ANA L.; TRINDADE, TITO, UNIV AVEIRO, …	CHEM. ENG. J.	SORBENTS BASED ON SILICA AND SILICA COATED MAGNETITE PARTICLES HAVE BEEN FUNCTIONALIZED WITH DITHIOCARBAMATE GROUPS, AIMING AT THE UPTAKE OF MERCURY. THE UPTAKE CAPACITY OF THE SYNTHESIZED MATERIALS WERE EVALUATED SYSTEMATICALLY FOR VARIABLE OPERATIONAL PARAMETERS INCLUDING DEGREE OF FUNCTIONALIZATION, SORPTION TIME, SORBENT DOSE, AND INITIAL HG(II) CONCENTRATION. REMOVAL EFFICIENCIES OF 99.6-99.…		LOPES, CB (CORRESPONDING AUTHOR), UNIV AVEIRO, DEPT CHEM, P-3810193 AVEIRO, PORTUGAL	10.1016/j.cej.2014.06.008		1385-8947	CHEMICAL ENGINEERING JOURNAL	ENGLISH	20		559-570			ELSEVIER SCIENCE SA	ISI	THE ROLE OF OPERATIONAL PARAMETERS ON THE UPTAKE OF MERCURY BY DITHIOCARBAMATE FUNCTIONALIZED PARTICLES	ARTICLE		254	2014	TAVARES DANIELA S;LOPES CLAUDIA B;DANIEL-DA-SILVA ANA L;DUARTE ARMANDO C;TRINDADE TITO;PEREIRA EDUARDA	CHEM ENG J	Sorbents based on silica and silica coated magnetite particles have been functionalized with dithiocarbamate groups, aiming at the uptake of mercury. The uptake capacity of the synthesized materials were evaluated systematically for variable operational parameters including degree of functionalization, sorption time, sorbent dose, and initial Hg(II) concentration. Removal efficiencies of 99.6-99.…	The role of operational parameters on the uptake of mercury by dithiocarbamate functionalized particles	Mercury sorption; Dithiocarbamate functionalization; Silica; Magnetite; Water treatment	none	UNIV AVEIRO;TAVARES;UNIV AVEIRO;TAVARES;UNIV AVEIRO;UNIV AVEIRO;UNIV AVEIRO	UNIV AVEIRO		TAVARES D, 2014, CHEM ENG J	TAVARES D, 2014, CHEM ENG J	PO BOX 564, 1001 LAUSANNE, SWITZERLAND	UNIVERSIDADE DE AVEIRO; UNIVERSIDADE DE AVEIRO; UNIVERSIDADE DE AVEIRO; UNIVERSIDADE DE AVEIRO		CLAUDIA.B.LOPES@UA.PT		2025-11-07	AN6EQ	1873-3212			FT (FUNDACAO PARA A CIENCIA E A TECNOLOGIA) [PTDC/CTM-NAN/120668/2010]; FEDER [PEST-C/MAR/LA0017/2013, PEST-C/CTM/LA0011/2013]; FCT [SFRH/BD/45156/2008]; FUNDAÇÃO PARA A CIÊNCIA E A TECNOLOGIA [PTDC/CTM-NAN/120668/2010] FUNDING SOURCE: FCT	THIS WORK WAS FINANCED BY NATIONAL FUNDING FROM FT (FUNDACAO PARA A CIENCIA E A TECNOLOGIA) THROUGH THE PROJECT PTDC/CTM-NAN/120668/2010, BY FEDER THROUGH PROGRAM COMPETE, AND THROUGH FCT/FEDER IN THE FRAME OF PROJECTS PEST-C/MAR/LA0017/2013 AND PEST-C/CTM/LA0011/2013 C.B. LOPES ALSO THANKS FCT FOR THE POST-DOC GRANT SFRH/BD/45156/2008.	OCT 15
LIM Y;KIM B;JANG J;LEE D	RICE-STRAW-DERIVED BIOCHAR; MERCURY REMEDIATION; ADSORPTION; RESPONSE; SURFACE METHODOLOGY; OPTIMIZATION; ENHANCED HYDROGEN-PRODUCTION; KEY PROCESS VARIABLES; ACTIVATED CARBON; ADSORPTION/DESORPTION BEHAVIOR; MALACHITE GREEN; MERCURY II; MONTMORILLONITE; NANOPARTICLES; DEGRADATION; MECHANISMS	RICE-STRAW-DERIVED BIOCHAR; MERCURY REMEDIATION; ADSORPTION; RESPONSE; SURFACE METHODOLOGY; OPTIMIZATION	ENHANCED HYDROGEN-PRODUCTION; KEY PROCESS VARIABLES; ACTIVATED CARBON; ADSORPTION/DESORPTION BEHAVIOR; MALACHITE GREEN; MERCURY II; MONTMORILLONITE; NANOPARTICLES; DEGRADATION; MECHANISMS	LEE, DS (CORRESPONDING AUTHOR), KYUNGPOOK NATL UNIV, DEPT ENVIRONM ENGN, 80 DAEHAK RO, DAEGU 41566, SOUTH KOREA.; JANG, J (CORRESPONDING AUTHOR), KOREA RADIOACT WASTE AGCY, DECOMMISSIONING WASTE R\&D TEAM, 174 GAJEONG RO, DAEJEON 34129, SOUTH KOREA.; LIM, YOUNGSU; KIM, BOLAM; LEE, DAE SUNG, KYUNGPOOK NATL UNIV, DEPT ENVIRONM ENGN, 80 DAEHAK RO, DAEGU 41566, SOUTH KOREA.; JANG, JISEON, KOREA RADIO…	J. ENVIRON. CHEM. ENG.	MAGNETIC RICE-STRAW-DERIVED BIOCHAR (MRBC) COMPOSITES WERE SYNTHESIZED BY BINDING MAGNETITE TO THE SURFACE OF THE BIOCHAR FOR THE HIGHLY EFFICIENT REMOVAL OF HG(II) FROM AN AQUEOUS SOLUTION. THE MAXIMUM ADSORPTION CAPACITY OF THE ADSORBENT WAS 85.8 MG/G, WHICH IS MUCH HIGHER THAN THOSE OF OTHER PREVIOUSLY REPORTED ADSORBENTS FOR HG(II) REMOVAL. THE EXPERIMENTAL DATA EXHIBITED A GOOD FIT WITH A PS…		LEE, DS (CORRESPONDING AUTHOR), KYUNGPOOK NATL UNIV, DEPT ENVIRONM ENGN, 80 DAEHAK RO, DAEGU 41566, SOUTH KOREA	10.1016/j.jece.2023.110048		2213-2929	JOURNAL OF ENVIRONMENTAL CHEMICAL ENGINEERING	ENGLISH	17	3				ELSEVIER SCI LTD	ISI	MAGNETIC RICE-STRAW-DERIVED BIOCHAR FOR ADSORPTIVE REMOVAL OF HG(II) FROM AQUEOUS SOLUTION: OPTIMIZATION USING RESPONSE SURFACE METHODOLOGY	ARTICLE		11	2023	LIM YOUNGSU;KIM BOLAM;JANG JISEON;LEE DAE SUNG	J ENVIRON CHEM ENG	Magnetic rice-straw-derived biochar (MRBC) composites were synthesized by binding magnetite to the surface of the biochar for the highly efficient removal of Hg(II) from an aqueous solution. The maximum adsorption capacity of the adsorbent was 85.8 mg/g, which is much higher than those of other previously reported adsorbents for Hg(II) removal. The experimental data exhibited a good fit with a ps…	Magnetic rice-straw-derived biochar for adsorptive removal of Hg(II) from aqueous solution: Optimization using response surface methodology	Rice-straw-derived biochar; Mercury remediation; Adsorption; Response; surface methodology; Optimization	none	KYUNGPOOK NATL UNIV;J (CORRESPONDING AUTHOR);KYUNGPOOK NATL UNIV	KYUNGPOOK NATL UNIV		LIM Y, 2023, J ENVIRON CHEM ENG	LIM Y, 2023, J ENVIRON CHEM ENG	125 LONDON WALL, LONDON, ENGLAND	KYUNGPOOK NATIONAL UNIVERSITY (KNU)	110048	POCAMBEL@NAVER.COM DAESUNG@KNU.AC.KR		2025-11-07	O1QN5	2213-3437	MAY 2023		BASIC SCIENCE RESEARCH PROGRAM THROUGH THE NATIONAL RESEARCH FOUNDATION OF KOREA (NRF) - MINISTRY OF EDUCATION [NRF-2018R1A6A1A03024962]; BASIC SCIENCE RESEARCH PROGRAM THROUGH THE NATIONAL RESEARCH FOUNDATION OF KOREA (NRF) - MINISTRY OF SCIENCE AND ICT [NRF-2020R1A2C2100746]	THIS RESEARCH WAS SUPPORTED BY THE BASIC SCIENCE RESEARCH PROGRAM THROUGH THE NATIONAL RESEARCH FOUNDATION OF KOREA (NRF) FUNDED BY THE MINISTRY OF EDUCATION (NRF-2018R1A6A1A03024962) AND THE MINISTRY OF SCIENCE AND ICT (NRF-2020R1A2C2100746) .	JUN
FERRAH N	MERCURY(II) ION REMOVAL; CHITOSAN; FE3O4 MICRO-PARTICLES; EDTA-NA-2; CROSS-LINKING; KINETIC AND EQUILIBRIUM MODELING; AQUEOUS-SOLUTIONS; METAL-IONS; ADSORPTION; NANOPARTICLES; SORPTION; PARTICLES; WATER; NANOCOMPOSITE; FE3O4-AT-SIO2; COMPOSITES	MERCURY(II) ION REMOVAL; CHITOSAN; FE3O4 MICRO-PARTICLES; EDTA-NA-2; CROSS-LINKING; KINETIC AND EQUILIBRIUM MODELING	AQUEOUS-SOLUTIONS; METAL-IONS; ADSORPTION; NANOPARTICLES; SORPTION; PARTICLES; WATER; NANOCOMPOSITE; FE3O4-AT-SIO2; COMPOSITES	FERRAH, N (CORRESPONDING AUTHOR), UNIV CTR NAAMA, BP 66, NAAMA 45000, ALGERIA.; FERRAH, N (CORRESPONDING AUTHOR), TLEMCEN UNIV, DEPT CHEM, LAB INORGAN CHEM \& ENVIRONM, BOX 119, TILIMSEN, ALGERIA.; FERRAH, NACER, UNIV CTR NAAMA, BP 66, NAAMA 45000, ALGERIA.; FERRAH, NACER, TLEMCEN UNIV, DEPT CHEM, LAB INORGAN CHEM \& ENVIRONM, BOX 119, TILIMSEN, ALGERIA.	ENVIRON. SCI. POLLUT. RES.	THIS COMPARATIVE STUDY INVESTIGATES PRE-CONCENTRATION/SEPARATION PROCEDURE FOR THE MAGNETIC SOLID PHASE EXTRACTION OF HG(II) SPECIES BY A NEW GREEN MATERIALS: NAKED MAGNETIC CHITOSAN FLAKES COATED FE3O4 MICRO-PARTICLES (NMCFS) AND MAGNETIC CHITOSAN FLAKES COATED FE3O4 MICRO-PARTICLES EMBEDDED ETHYLENEDIAMINETETRAACETIC-DISODIUM (MCFS-EDTA-NA-2) IN A BATCH PROCESS. THE SORPTION PROCEDURE WAS OPTIM…		FERRAH, N (CORRESPONDING AUTHOR), UNIV CTR NAAMA, BP 66, NAAMA 45000, ALGERIA	10.1007/s11356-018-2553-6		0944-1344	ENVIRONMENTAL SCIENCE AND POLLUTION RESEARCH	ENGLISH	11	25	24923-24938			SPRINGER HEIDELBERG	ISI	COMPARATIVE STUDY OF MERCURY(II) SPECIES REMOVAL ONTO NAKED AND MODIFIED MAGNETIC CHITOSAN FLAKES COATED ETHYLENEDIAMINETETRAACETIC-DISODIUM: KINETIC AND THERMODYNAMIC MODELING	ARTICLE		25	2018	FERRAH NACER	ENVIRON SCI POLLUT RES	This comparative study investigates pre-concentration/separation procedure for the magnetic solid phase extraction of Hg(II) species by a new green materials: naked magnetic chitosan flakes coated Fe3O4 micro-particles (NMCFs) and magnetic chitosan flakes coated Fe3O4 micro-particles embedded ethylenediaminetetraacetic-disodium (MCFs-EDTA-Na-2) in a batch process. The sorption procedure was optim…	Comparative study of mercury(II) species removal onto naked and modified magnetic chitosan flakes coated ethylenediaminetetraacetic-disodium: kinetic and thermodynamic modeling	Mercury(II) ion removal; Chitosan; Fe3O4 micro-particles; EDTA-Na-2; cross-linking; Kinetic and equilibrium modeling	none	UNIV CTR NAAMA;TLEMCEN UNIV;UNIV CTR NAAMA;TLEMCEN UNIV	UNIV CTR NAAMA		FERRAH N, 2018, ENVIRON SCI POLLUT RES	FERRAH N, 2018, ENVIRON SCI POLLUT RES	TIERGARTENSTRASSE 17, D-69121 HEIDELBERG, GERMANY	UNIVERSITE ABOU BEKR BELKAID		FERRAHNACER@YAHOO.FR		2025-11-07	GR8VQ	1614-7499					SEP
PAN S;SHEN H;XU Q;LUO J;HU ;MEIQIN M	MERCAPTO-FUNCTIONALIZED NANO-FE3O4 MAGNETIC POLYMERS (SH-FE3O4-NMPS); SURFACE MERCAPTO ENGINEERED; ADSORPTION; HG(II); FREUNDLICH ISOTHERM; PH; EFFECT; CL- EFFECT; WATER; IONS; ADSORBENTS; DYES; SORPTION; SORBENT; SILICA; RESINS	MERCAPTO-FUNCTIONALIZED NANO-FE3O4 MAGNETIC POLYMERS (SH-FE3O4-NMPS); SURFACE MERCAPTO ENGINEERED; ADSORPTION; HG(II); FREUNDLICH ISOTHERM; PH; EFFECT; CL- EFFECT	ADSORPTION; WATER; IONS; ADSORBENTS; HG(II); DYES; SORPTION; SORBENT; SILICA; RESINS	SHEN, HY (CORRESPONDING AUTHOR), ZHEJIANG UNIV, NINGBO INST TECHNOL, NINGBO 315100, ZHEJIANG, PEOPLES R CHINA.; PAN, SHENGDONG; SHEN, HAOYU; XU, QIHONG; LUO, JIAN; HU, MEIQIN, ZHEJIANG UNIV, NINGBO INST TECHNOL, NINGBO 315100, ZHEJIANG, PEOPLES R CHINA.; PAN, SHENGDONG, ZHEJIANG UNIV, COLL SCI, HANGZHOU 310027, ZHEJIANG, PEOPLES R CHINA.	J. COLLOID INTERFACE SCI.	IN THIS STUDY, MERCAPTO-FUNCTIONALIZED NANO-FE3O4 MAGNETIC POLYMERS (SH-FE3O4-NMPS) HAVE BEEN PREPARED AND CHARACTERIZED BY TRANSMISSION ELECTRON MICROSCOPY (TEM), X-RAY DIFFRACTOMETER (XRD), VIBRATING SAMPLE MAGNETOMETER (VSM), THERMOGRAVIMETRY AND DIFFERENTIAL THERMOGRAVIMETRY ANALYSES (TG-DTA), AS WELL AS FOURIER-TRANSFORMED INFRARED SPECTROSCOPY (FTIR). THE ADSORPTIVE CHARACTERISTICS OF THE S…		SHEN, HY (CORRESPONDING AUTHOR), ZHEJIANG UNIV, NINGBO INST TECHNOL, NINGBO 315100, ZHEJIANG, PEOPLES R CHINA	10.1016/j.jcis.2011.09.002		0021-9797	JOURNAL OF COLLOID AND INTERFACE SCIENCE	ENGLISH	113	1	204-212			ACADEMIC PRESS INC ELSEVIER SCIENCE	ISI	SURFACE MERCAPTO ENGINEERED MAGNETIC FE3O4 NANOADSORBENT FOR THE REMOVAL OF MERCURY FROM AQUEOUS SOLUTIONS	ARTICLE		365	2012	PAN SHENGDONG;SHEN HAOYU;XU QIHONG;LUO JIAN;HU; MEIQIN	J COLLOID INTERFACE SCI	In this study, mercapto-functionalized nano-Fe3O4 magnetic polymers (SH-Fe3O4-NMPs) have been prepared and characterized by transmission electron microscopy (TEM), X-ray diffractometer (XRD), vibrating sample magnetometer (VSM), thermogravimetry and differential thermogravimetry analyses (TG-DTA), as well as Fourier-transformed infrared spectroscopy (FTIR). The adsorptive characteristics of the S…	Surface mercapto engineered magnetic Fe3O4 nanoadsorbent for the removal of mercury from aqueous solutions	Mercapto-functionalized nano-Fe3O4 magnetic polymers (SH-Fe3O4-NMPs); Surface mercapto engineered; Adsorption; Hg(II); Freundlich isotherm; pH; effect; Cl- effect	none	ZHEJIANG UNIV;ZHEJIANG UNIV;ZHEJIANG UNIV	ZHEJIANG UNIV		PAN S, 2012, J COLLOID INTERFACE SCI	PAN S, 2012, J COLLOID INTERFACE SCI	525 B ST, STE 1900, SAN DIEGO, CA 92101-4495 USA	ZHEJIANG UNIVERSITY; ZHEJIANG UNIVERSITY		HYSHEN@NIT.ZJU.EDU.CN		2025-11-07	839WX	1095-7103			ZHEJIANG SCIENCE AND TECHNOLOGY BUREAU [2009R50004]	WE WOULD LIKE TO THANK THE ZHEJIANG SCIENCE AND TECHNOLOGY BUREAU (2009R50004) FOR THE FINANCIAL SUPPORT.	JAN 1
VICENTE-MARTINEZ Y;CARAVACA M;SOTO-MECA A	ADSORPTION; ADSORPTION ISOTHERM; MAGNETIC NANOMATERIAL; MERCURY REMOVAL; REMEDIATION; SILVER NANOPARTICLES; ONE-STEP SYNTHESIS; AQUEOUS-SOLUTION; FE3O4 NANOPARTICLES; GRAPHENE; OXIDE; HG(II) IONS; FACILE SYNTHESIS; II IONS; REMOVAL; WATER; PERFORMANCE	ADSORPTION; ADSORPTION ISOTHERM; MAGNETIC NANOMATERIAL; MERCURY REMOVAL; REMEDIATION; SILVER NANOPARTICLES	ONE-STEP SYNTHESIS; AQUEOUS-SOLUTION; FE3O4 NANOPARTICLES; GRAPHENE; OXIDE; HG(II) IONS; FACILE SYNTHESIS; II IONS; REMOVAL; WATER; PERFORMANCE	VICENTE-MARTÍNEZ, Y (CORRESPONDING AUTHOR), SPANISH AIR FORCE ACAD, UNIV CTR DEF, MDE UPCT, C CORONEL LOPEZ PENA S-N, MURCIA 30720, SPAIN.; VICENTE-MARTINEZ, Y.; CARAVACA, M.; SOTO-MECA, A., SPANISH AIR FORCE ACAD, UNIV CTR DEF, MDE UPCT, C CORONEL LOPEZ PENA S-N, MURCIA 30720, SPAIN.	CHEMOSPHERE	WE INTRODUCE A NOVEL, EFFICIENT AND FAST METHOD FOR THE TOTAL AND SIMULTANEOUS REMOVAL OF MONOMETHYLMERCURY, DIMETHYLMERCURY, ETHYLMERCURY AND HG (II) FROM AQUATIC ENVIRONMENTS USING MAGNETIC CORE NANOPARTICLES, COATED WITH METALLIC NANOMERIC SILVER AND FUNCTIONALIZED WITH L-CYSTEINE. AS FAR AS THE AUTHORS KNOW, SIMULTANEOUS REMOVAL HAS NOT BEEN ACHIEVED PREVIOUSLY. THE EXPERIMENTAL DESIGN WAS BA…		VICENTE-MARTÍNEZ, Y (CORRESPONDING AUTHOR), SPANISH AIR FORCE ACAD, UNIV CTR DEF, MDE UPCT, C CORONEL LOPEZ PENA S-N, MURCIA 30720, SPAIN	10.1016/j.chemosphere.2021.131128		0045-6535	CHEMOSPHERE	ENGLISH	20					PERGAMON-ELSEVIER SCIENCE LTD	ISI	SIMULTANEOUS ADSORPTION OF MERCURY SPECIES FROM AQUATIC ENVIRONMENTS USING MAGNETIC NANOPARTICLES COATED WITH NANOMERIC SILVER FUNCTIONALIZED WITH L-CYSTEINE	ARTICLE		282	2021	VICENTE-MARTINEZ Y;CARAVACA M;SOTO-MECA A	CHEMOSPHERE	We introduce a novel, efficient and fast method for the total and simultaneous removal of monomethylmercury, dimethylmercury, ethylmercury and Hg (II) from aquatic environments using magnetic core nanoparticles, coated with metallic nanomeric silver and functionalized with L-Cysteine. As far as the authors know, simultaneous removal has not been achieved previously. The experimental design was ba…	Simultaneous adsorption of mercury species from aquatic environments using magnetic nanoparticles coated with nanomeric silver functionalized with L-Cysteine	Adsorption; Adsorption isotherm; Magnetic nanomaterial; Mercury removal; Remediation; Silver nanoparticles	none	UNIV CTR DEF;UNIV CTR DEF	UNIV CTR DEF		VICENTE-MARTINEZ Y, 2021, CHEMOSPHERE	VICENTE-MARTINEZ Y, 2021, CHEMOSPHERE	THE BOULEVARD, LANGFORD LANE, KIDLINGTON, OXFORD OX5 1GB, ENGLAND		131128	MANUEL.CARAVACA@CUD.UPCT.ES		2025-11-07	TR8UC	1879-1298	JUN 2021		UNIVERSITY CENTRE OF DEFENCE AT THE SPANISH AIR FORCE ACADEMY, MDEUPCT	THE AUTHORS WANT TO THANK THE UNIVERSITY CENTRE OF DEFENCE AT THE SPANISH AIR FORCE ACADEMY, MDEUPCT, FOR FINANCIAL SUPPORT.	NOV
WANG X;ZHANG D;QIAN H;LIANG Y;PAN X;GADD G	ATTACHMENT EFFICIENCY; EXTRACELLULAR POLYMERIC SUBSTANCES; HOMOAGGREGATION; HETEROAGGREGATION; REMEDIATION; TITANIUM-DIOXIDE NANOPARTICLES; COMPACT FLUORESCENT LAMPS; ENGINEERED NANOPARTICLES; AGGREGATION; KINETICS; AQUEOUS ENVIRONMENTS; SILVER NANOPARTICLES; CARBON NANOTUBES; NANO-SELENIUM; HUMIC-ACID	ATTACHMENT EFFICIENCY; EXTRACELLULAR POLYMERIC SUBSTANCES; HOMOAGGREGATION; HETEROAGGREGATION; REMEDIATION	EXTRACELLULAR POLYMERIC SUBSTANCES; TITANIUM-DIOXIDE NANOPARTICLES; COMPACT FLUORESCENT LAMPS; ENGINEERED NANOPARTICLES; AGGREGATION; KINETICS; AQUEOUS ENVIRONMENTS; SILVER NANOPARTICLES; CARBON NANOTUBES; NANO-SELENIUM; HUMIC-ACID	PAN, XL (CORRESPONDING AUTHOR), CHINESE ACAD SCI, XINJIANG INST ECOL \& GEOG, XINJIANG KEY LAB ENVIRONM POLLUT \& BIOREMEDIAT, URUMQI 830011, PEOPLES R CHINA.; WANG, XIAONAN; ZHANG, DAOYONG; QIAN, HAIFENG; LIANG, YAN; PAN, XIANGLIANG, CHINESE ACAD SCI, XINJIANG INST ECOL \& GEOG, XINJIANG KEY LAB ENVIRONM POLLUT \& BIOREMEDIAT, URUMQI 830011, PEOPLES R CHINA.; ZHANG, DAOYONG; QIAN, HAIFENG; PAN, …	SCI. TOTAL ENVIRON.	UBIQUITOUS COLLOIDALMINERALS SUCH AS GOETHITE CAN HAVE A SIGNIFICANT IMPACT ON THE PERFORMANCE OF NANOPARTICLES-BASED GROUNDWATER REMEDIATION DUE TO AGGREGATION. HETEROAGGREGATION AND RETENTION OF SE NANOPARTICLES (SENPS) BY GOETHITE IN GROUNDWATER, AND ITS IMPACT ON HGO REMEDIATION BY SENPS WERE INVESTIGATED IN THIS STUDY. IN ORDER TO MITIGATE THE ADVERSE EFFECTS OF AGGREGATION, THE EFFECTS OF B…		PAN, XL (CORRESPONDING AUTHOR), CHINESE ACAD SCI, XINJIANG INST ECOL \& GEOG, XINJIANG KEY LAB ENVIRONM POLLUT \& BIOREMEDIAT, URUMQI 830011, PEOPLES R CHINA	10.1016/j.scitotenv.2017.09.113		0048-9697	SCIENCE OF THE TOTAL ENVIRONMENT	ENGLISH	31		672-678			ELSEVIER SCIENCE BV	ISI	INTERACTIONS BETWEEN BIOGENIC SELENIUM NANOPARTICLES AND GOETHITE COLLOIDS AND CONSEQUENCE FOR REMEDIATION OF ELEMENTAL MERCURY CONTAMINATED GROUNDWATER	ARTICLE		613	2018	WANG XIAONAN;ZHANG DAOYONG;QIAN HAIFENG;LIANG YAN; PAN XIANGLIANG;GADD GEOFFREY MICHAEL	SCI TOTAL ENVIRON	Ubiquitous colloidalminerals such as goethite can have a significant impact on the performance of nanoparticles-based groundwater remediation due to aggregation. Heteroaggregation and retention of Se nanoparticles (SeNPs) by goethite in groundwater, and its impact on HgO remediation by SeNPs were investigated in this study. In order to mitigate the adverse effects of aggregation, the effects of b…	Interactions between biogenic selenium nanoparticles and goethite colloids and consequence for remediation of elemental mercury contaminated groundwater	Attachment efficiency; Extracellular polymeric substances; Homoaggregation; Heteroaggregation; Remediation	none	XINJIANG INST ECOL AND GEOG;XINJIANG INST ECOL AND GEOG;ZHEJIANG UNIV TECHNOL;UNIV CHINESE ACAD SCI;UNIV DUNDEE	XINJIANG INST ECOL AND GEOG		WANG X, 2018, SCI TOTAL ENVIRON	WANG X, 2018, SCI TOTAL ENVIRON	PO BOX 211, 1000 AE AMSTERDAM, NETHERLANDS	CHINESE ACADEMY OF SCIENCES; XINJIANG INSTITUTE OF ECOLOGY \& GEOGRAPHY, CAS; ZHEJIANG UNIVERSITY OF TECHNOLOGY; CHINESE ACADEMY OF SCIENCES; UNIVERSITY OF CHINESE ACADEMY OF SCIENCES, CAS; UNIVERSITY OF DUNDEE		PANXL@ZJUT.EDU.CN		2025-11-07	FL3XT	1879-1026			NATIONAL NATURAL SCIENCE FOUNDATION OF CHINA [U1503281, U1403181]; NATIONAL ENVIRONMENTAL RESEARCH COUNCIL (UK) SECURITY OF SUPPLY OF MINERAL RESOURCES GRANT PROGRAM: TELLURIUM AND SELENIUM CYCLING AND SUPPLY (TEASE) [NE/M01090/1]; NATURAL ENVIRONMENT RESEARCH COUNCIL [NE/M010910/1, NE/M011275/1, NE/M010848/1, 1804973, 1807872] FUNDING SOURCE: RESEARCHFISH; NERC [NE/M011275/1, 1807872, NE/M010910…	THIS WORK WAS SUPPORTED BY THE NATIONAL NATURAL SCIENCE FOUNDATION OF CHINA (U1503281 AND U1403181). G. M. GADD GRATEFULLY ACKNOWLEDGES AN AWARD (NE/M01090/1) UNDER THE NATIONAL ENVIRONMENTAL RESEARCH COUNCIL (UK) SECURITY OF SUPPLY OF MINERAL RESOURCES GRANT PROGRAM: TELLURIUM AND SELENIUM CYCLING AND SUPPLY (TEASE).	FEB 1
VILTRES H;GUPTA N;PAZ R;DHAVALE ;RUSHIKESH P R;PARK H;LEYVA C;SRINIVASAN ;SESHASAI S;RAJABZADEH A	MERCURY; ADSORPTION; FERRITE; SPECTROSCOPY; MECHANISM; AQUEOUS-SOLUTIONS; REMOVAL; OXIDE; IONS; HG2+; COMPOSITE; ADSORBENT; HG(II); NANOCOMPOSITE; FABRICATION	MERCURY; ADSORPTION; FERRITE; SPECTROSCOPY; MECHANISM	AQUEOUS-SOLUTIONS; REMOVAL; OXIDE; IONS; HG2+; COMPOSITE; ADSORBENT; HG(II); NANOCOMPOSITE; FABRICATION	LEYVA, C (CORRESPONDING AUTHOR), INST POLITECN NACL, CTR INVEST CIENCIA APLICADA \& TECNOL AVANZADA, CDMX, MEXICO.; VILTRES, HERLYS; SRINIVASAN, SESHASAI; RAJABZADEH, AMIN REZA, MCMASTER UNIV, SCH ENGN PRACTICE \& TECHNOL, HAMILTON, ON, CANADA.; GUPTA, NISHESH KUMAR, UNIV SCI \& TECHNOL UST, DEPT ENVIRONM RES, DAEJEON, SOUTH KOREA.; GUPTA, NISHESH KUMAR, KOREA INST CIVIL ENGN \& BLDG TECHNOL KICT…	ENVIRON. TECHNOL.	IN THIS STUDY, INVERSE SPINEL CUBIC FERRITES MFE2O4 (M = FE2+, AND CO2+) HAVE BEEN FABRICATED FOR THE HIGH-CAPACITY ADSORPTIVE REMOVAL OF HG(II) IONS. THE PXRD ANALYSIS CONFIRMED FERRITES WITH THE PRESENCE OF RESIDUAL NACL. THE SURFACE AREA OF FE3O4 (FE-F) AND COFE2O4 (CO-F) MATERIAL WAS 69.1 AND 45.2 M(2) G(-1), RESPECTIVELY. THE CO-F AND FE-F SHOWED THE MAXIMUM HG(II) ADSORPTION CAPACITY OF 459…		LEYVA, C (CORRESPONDING AUTHOR), INST POLITECN NACL, CTR INVEST CIENCIA APLICADA \& TECNOL AVANZADA, CDMX, MEXICO	10.1080/09593330.2022.2138787		0959-3330	ENVIRONMENTAL TECHNOLOGY	ENGLISH	7	6	1155-1168			TAYLOR \& FRANCIS LTD	ISI	MERCURY REMEDIATION FROM WASTEWATER THROUGH ITS SPONTANEOUS ADSORPTION ON NON-FUNCTIONALIZED INVERSE SPINEL MAGNETIC FERRITE NANOPARTICLES	ARTICLE		45	2024	VILTRES HERLYS;GUPTA NISHESH KUMAR;PAZ ROXANA;DHAVALE; RUSHIKESH P;PARK HYUNG-HO;LEYVA CAROLINA;SRINIVASAN; SESHASAI;RAJABZADEH AMIN REZA	ENVIRON TECHNOL	In this study, inverse spinel cubic ferrites MFe2O4 (M = Fe2+, and Co2+) have been fabricated for the high-capacity adsorptive removal of Hg(II) ions. The PXRD analysis confirmed ferrites with the presence of residual NaCl. The surface area of Fe3O4 (Fe-F) and CoFe2O4 (Co-F) material was 69.1 and 45.2 m(2) g(-1), respectively. The Co-F and Fe-F showed the maximum Hg(II) adsorption capacity of 459…	Mercury remediation from wastewater through its spontaneous adsorption on non-functionalized inverse spinel magnetic ferrite nanoparticles	Mercury; Adsorption; Ferrite; Spectroscopy; Mechanism	none	INST POLITECN NACL;VILTRES;MCMASTER UNIV;UNIV SCI AND TECHNOL UST;KOREA INST CIVIL ENGN AND BLDG TECHNOL KICT;INST POLITECN NACL;YONSEI UNIV	INST POLITECN NACL		VILTRES H, 2024, ENVIRON TECHNOL	VILTRES H, 2024, ENVIRON TECHNOL	2-4 PARK SQUARE, MILTON PARK, ABINGDON OR14 4RN, OXON, ENGLAND	MCMASTER UNIVERSITY; UNIVERSITY OF SCIENCE \& TECHNOLOGY (UST); KOREA INSTITUTE OF CIVIL ENGINEERING \& BUILDING TECHNOLOGY (KICT); YONSEI UNIVERSITY		VILTRESH@MCMASTER.CA		2025-11-07	HJ1H1	1479-487X	OCT 2022		NATIONAL RESEARCH FOUNDATION OF KOREA (NRF) - KOREA GOVERNMENT (MSIT) [2020R1A5A1019131]	THE AUTHORS THANK LABORATORIO NACIONAL DE CIENCIA, TECNOLOGIA Y GESTION INTEGRADA DEL AGUA (LNAGUA) AND LNCAE (LABORATORIO NACIONAL DE CONVERSION Y ALMACENAMIENTO DE ENERGIA) FOR THE ACCESS TO THEIR EXPERIMENTAL FACILITY AND EQUIPMENT. R.P. DHAVALE AND H.H. PARK WOULD LIKE TO THANK FOR THE SUPPORT FROM THE NATIONAL RESEARCH FOUNDATION OF KOREA (NRF) GRANT FUNDED BY THE KOREA GOVERNMENT (MSIT) (NO…	MAR 7
MAHMOUD M;SAAD E;SOLIMAN M;ABDELWAHAB M	NZVI; 2-PYRIDENECARBOXALDEHYDE; DIETHYLENETRIAMINE; ADSORPTION; RADIOACTIVE ISOTOPES; IRON NANOPARTICLES; AQUEOUS-SOLUTION; WASTE-WATER; CARBON; NANOCOMPOSITES; ADSORBENTS; RADIONUCLIDES; DEGRADATION; KINETICS	NZVI; 2-PYRIDENECARBOXALDEHYDE; DIETHYLENETRIAMINE; ADSORPTION; RADIOACTIVE ISOTOPES	IRON NANOPARTICLES; AQUEOUS-SOLUTION; WASTE-WATER; ADSORPTION; CARBON; NANOCOMPOSITES; ADSORBENTS; RADIONUCLIDES; DEGRADATION; KINETICS	ABDELWAHAB, MS (CORRESPONDING AUTHOR), AIN SHAMS UNIV, CHEM DEPT, FAC SCI, POB 1156, CAIRO, EGYPT.; MAHMOUD, MOHAMED E., ALEXANDRIA UNIV, CHEM DEPT, FAC SCI, ALEXANDRIA, EGYPT.; SAAD, EBTISSAM AHMED; ABDELWAHAB, MOHAMED S., AIN SHAMS UNIV, CHEM DEPT, FAC SCI, POB 1156, CAIRO, EGYPT.; SOLIMAN, MOHAMED ALI, ATOM ENERGY AUTHOR, EGYPT SECOND RES REACTOR, CAIRO, EGYPT.	MICROCHEM J.	IN THIS STUDY AN EFFICIENT NANOMATERIAL HAS BEEN DEVELOPED FOR THE REMOVAL OF CO(II), ZN(II), CD(II), PB(II), CU(II), HG(II) IONS AND RADIONUCLIDES FROM WATER USING SYNTHESIZED NANOZEROVALENT IRON (NZVI). TO PROTECT NZVI AND ENHANCE THE ADSORPTION CAPACITY, IT WAS THEN MODIFIED WITH DIETHYLENETRIAMINE (DETA) FOLLOWED BY FUNCTIONALIZATION USING 2-PYRIDENECARBOXALDEHYDE (PY). THE EFFICIENCY OF SYNT…		ABDELWAHAB, MS (CORRESPONDING AUTHOR), AIN SHAMS UNIV, CHEM DEPT, FAC SCI, POB 1156, CAIRO, EGYPT	10.1016/j.microc.2018.12.032		0026-265X	MICROCHEMICAL JOURNAL	ENGLISH	35		1102-1111			ELSEVIER	ISI	REMOVAL OF RADIOACTIVE COBALT/ZINC AND SOME HEAVY METALS FROM WATER USING DIETHYLENETRIAMINE/2-PYRIDINECARBOXALDEHYDE SUPPORTED ON NZVI	ARTICLE; PROCEEDINGS PAPER		145	2019	MAHMOUD MOHAMED E;SAAD EBTISSAM AHMED;SOLIMAN MOHAMED ALI;ABDELWAHAB MOHAMED S	MICROCHEM J	In this study an efficient nanomaterial has been developed for the removal of Co(II), Zn(II), Cd(II), Pb(II), Cu(II), Hg(II) ions and radionuclides from water using synthesized nanozerovalent iron (NZVI). To protect NZVI and enhance the adsorption capacity, it was then modified with diethylenetriamine (DETA) followed by functionalization using 2-pyridenecarboxaldehyde (PY). The efficiency of synt…	Removal of radioactive cobalt/zinc and some heavy metals from water using diethylenetriamine/2-pyridinecarboxaldehyde supported on NZVI	NZVI; 2-Pyridenecarboxaldehyde; Diethylenetriamine; Adsorption; Radioactive isotopes	none	AIN SHAMS UNIV;ALEXANDRIA UNIV;AIN SHAMS UNIV;EGYPT SECOND RES REACTOR	AIN SHAMS UNIV		MAHMOUD M, 2019, MICROCHEM J	MAHMOUD M, 2019, MICROCHEM J	RADARWEG 29, 1043 NX AMSTERDAM, NETHERLANDS	EGYPTIAN KNOWLEDGE BANK (EKB); ALEXANDRIA UNIVERSITY; EGYPTIAN KNOWLEDGE BANK (EKB); AIN SHAMS UNIVERSITY; EGYPTIAN KNOWLEDGE BANK (EKB); EGYPTIAN ATOMIC ENERGY AUTHORITY (EAEA)		MOHAMED-SAID-SCIENCE@HOTMAIL.COM		2025-11-07	HJ9IV	1095-9149					MAR
WIBOWO Y;ANWAR D;SAFITRI H;SURYA I;SUDIBYO S;YULIANSYAH A;PETRUS ;HIMAWAN T B M H	ADSORPTION-ABSORPTION METHOD; FUNCTIONALIZED MATERIALS; HEAVY METALS; MAGNETITE-BIOCHAR IMMOBILIZED; WASTEWATER TREATMENT; LOW-COST ADSORBENT; ZERO-VALENT IRON; AQUEOUS-SOLUTION; HEAVY-METALS; BACILLUS-LICHENIFORMIS; ENHANCED ADSORPTION; EFFICIENT REMOVAL; MALACHITE GREEN; WASTE-WATER; CD(II)	ADSORPTION-ABSORPTION METHOD; FUNCTIONALIZED MATERIALS; HEAVY METALS; MAGNETITE-BIOCHAR IMMOBILIZED; WASTEWATER TREATMENT	LOW-COST ADSORBENT; ZERO-VALENT IRON; AQUEOUS-SOLUTION; HEAVY-METALS; BACILLUS-LICHENIFORMIS; ENHANCED ADSORPTION; EFFICIENT REMOVAL; MALACHITE GREEN; WASTE-WATER; CD(II)	WIBOWO, YG (CORRESPONDING AUTHOR), UNIV GADJAH MADA, FAC ENGN, DEPT CHEM ENGN, SUSTAINABLE MINERAL PROC RES GRP, JL GRAFIKA 2, YOGYAKARTA 55281, INDONESIA.; WIBOWO, YUDHA GUSTI; ANWAR, DEDY; YULIANSYAH, AHMAD TAWFIEQURRAHMAN; PETRUS, HIMAWAN TRI BAYU MURTI, UNIV GADJAH MADA, FAC ENGN, DEPT CHEM ENGN, SUSTAINABLE MINERAL PROC RES GRP, JL GRAFIKA 2, YOGYAKARTA 55281, INDONESIA.; WIBOWO, YUDHA GUSTI…	NEXT MATER.	ENVIRONMENTAL POLLUTION BY HEAVY METALS SUCH AS CADMIUM (CD), MERCURY (HG), AND LEAD (PB) POSES SEVERE RISKS TO ECOLOGICAL AND HUMAN HEALTH. CONVENTIONAL REMEDIATION TECHNOLOGIES OFTEN FALL SHORT IN EFFICACY AND SUSTAINABILITY. THIS STUDY EXPLORES A NOVEL HYBRID SYSTEM COMBINING FUNCTIONALIZED MAGNETITE-BIOCHAR WITH LIVE AND DEAD BACTERIA FOR ENHANCED ADSORPTION-BIOSORPTION OF THESE CONTAMINANTS …		WIBOWO, YG (CORRESPONDING AUTHOR), UNIV GADJAH MADA, FAC ENGN, DEPT CHEM ENGN, SUSTAINABLE MINERAL PROC RES GRP, JL GRAFIKA 2, YOGYAKARTA 55281, INDONESIA	10.1016/j.nxmate.2025.100487			NEXT MATERIALS	ENGLISH	8					ELSEVIER	ISI	FUNCTIONALIZED MAGNETITE-BIOCHAR WITH LIVE AND DEAD BACTERIA FOR ADSORPTION-BIOSORPTION OF HIGHLY TOXIC METALS: CD, HG, AND PB	ARTICLE		6	2025	WIBOWO YUDHA GUSTI;ANWAR DEDY;SAFITRI HANA;SURYA INDRA;SUDIBYO SUDIBYO;YULIANSYAH AHMAD TAWFIEQURRAHMAN;PETRUS; HIMAWAN TRI BAYU MURTI	NEXT MATER	Environmental pollution by heavy metals such as cadmium (Cd), mercury (Hg), and lead (Pb) poses severe risks to ecological and human health. Conventional remediation technologies often fall short in efficacy and sustainability. This study explores a novel hybrid system combining functionalized magnetite-biochar with live and dead bacteria for enhanced adsorption-biosorption of these contaminants …	Functionalized magnetite-biochar with live and dead bacteria for adsorption-biosorption of highly toxic metals: Cd, Hg, and Pb	Adsorption-absorption method; Functionalized materials; Heavy metals; Magnetite-biochar immobilized; Wastewater treatment	none	UNIV GADJAH MADA;UNIV GADJAH MADA;INST TEKNOL SUMATERA;UNIV SUMATERA UTARA;RES CTR MINERAL PROC	UNIV GADJAH MADA		WIBOWO Y, 2025, NEXT MATER	WIBOWO Y, 2025, NEXT MATER	RADARWEG 29, 1043 NX AMSTERDAM, NETHERLANDS	GADJAH MADA UNIVERSITY; UNIVERSITY OF NORTH SUMATRA; NATIONAL RESEARCH \& INNOVATION AGENCY OF INDONESIA (BRIN)	100487	YUDHA.WIBOWO@TA.ITERA.AC.ID		2025-11-07	1JO0X	2949-8228					JAN
CHEN D;SAWUT A;WANG T	ADSORBING MATERIAL; MAGNETIC NANOMATERIALS; REMOVAL OF MERCURY IONS; METHODS FOR REMOVING HEAVY METAL IONS; NANOPARTICLES; REMOVAL; MERCURY; POLYMER; FE3O4; BEADS; PHASE	ADSORBING MATERIAL; MAGNETIC NANOMATERIALS; REMOVAL OF MERCURY IONS; METHODS FOR REMOVING HEAVY METAL IONS	NANOPARTICLES; REMOVAL; MERCURY; POLYMER; FE3O4; BEADS; PHASE	CHEN, D (CORRESPONDING AUTHOR), XINJIANG EDUC INST, KEY LAB FUNCT POLYMER, URUMQI 830043, PEOPLES R CHINA.; CHEN, DUN, XINJIANG EDUC INST, KEY LAB FUNCT POLYMER, URUMQI 830043, PEOPLES R CHINA.; SAWUT, AMATJAN; WANG, TAO, XINJIANG UNIV, COLL CHEM, URUMQI 830017, XINJIANG, PEOPLES R CHINA.	HELIYON	FE3O4@SIO2-NH-NNG-SPTZ (INCLUDING FE3O4@SIO2-NH-2NG-SPTZ, FE3O4@SIO2-NH-3NG-SPTZ) WERE PREPARED BY 2-MERCAPTO-5-(4-PYRIDYL)-1,3,4-THIADIAZOLE AND THE REACTION PRODUCTS OF 3, 6-DICHLOROPYRIDAZINE AND CYANURIC CHLORIDE WITH FE3O4@SIO2-NH2 RESPECTIVELY. FE3O4@SIO2-S-NNG-SPTZ (INCLUDING FE3O4@SIO2-S-2NG-SPTZ, FE3O4@SIO2-S-3NG-SPTZ) WERE PREPARED BY 2-MERCAPTO-5-(4-PYRIDYL)-1,3,4-THIADIAZOLE AND THE R…		CHEN, D (CORRESPONDING AUTHOR), XINJIANG EDUC INST, KEY LAB FUNCT POLYMER, URUMQI 830043, PEOPLES R CHINA	10.1016/j.heliyon.2022.e10528			HELIYON	ENGLISH	7	9				CELL PRESS	ISI	SYNTHESIS OF NEW FUNCTIONALIZED MAGNETIC NANO ADSORBENTS AND ADSORPTION PERFORMANCE FOR HG(II) IONS	ARTICLE		8	2022	CHEN DUN;SAWUT AMATJAN;WANG TAO	HELIYON	Fe3O4@SiO2-NH-nNG-SPTZ (including Fe3O4@SiO2-NH-2NG-SPTZ, Fe3O4@SiO2-NH-3NG-SPTZ) were prepared by 2-mercapto-5-(4-pyridyl)-1,3,4-thiadiazole and the reaction products of 3, 6-dichloropyridazine and cyanuric chloride with Fe3O4@SiO2-NH2 respectively. Fe3O4@SiO2-S-nNG-SPTZ (including Fe3O4@SiO2-S-2NG-SPTZ, Fe3O4@SiO2-S-3NG-SPTZ) were prepared by 2-mercapto-5-(4-pyridyl)-1,3,4-thiadiazole and the r…	Synthesis of new functionalized magnetic nano adsorbents and adsorption performance for Hg(II) ions	Adsorbing material; Magnetic nanomaterials; Removal of mercury ions; Methods for removing heavy metal ions	none	XINJIANG EDUC INST;XINJIANG EDUC INST;XINJIANG UNIV	XINJIANG EDUC INST		CHEN D, 2022, HELIYON	CHEN D, 2022, HELIYON	50 HAMPSHIRE ST, FLOOR 5, CAMBRIDGE, MA 02139 USA	XINJIANG UNIVERSITY	E10528	314454575@QQ.COM		2025-11-07	5B0XJ	2405-8440	SEP 2022		GENERAL PROJECT OF NATURAL SCIENCE OF XINJIANG AUTONOMOUS REGION [2022D01C22]	FUNDING AMATJAN SAWUT WAS SUPPORTED BY GENERAL PROJECT OF NATURAL SCIENCE OF XINJIANG AUTONOMOUS REGION (NO. 2022D01C22) .	SEP
KHAZAEI M;NASSERI S;GANJALI M;KHOOBI M;NABIZADEH R;GHOLIBEGLOO E;NAZMARA ;SHAHROKH S	GRAPHENE OXIDE; SELECTIVE REMOVAL; LIGAND; MERCURY; ADSORPTION; ISOTHERM; DIVALENT METAL-IONS; COVALENT ORGANIC FRAMEWORKS; MAGNETIC MESOPOROUS; SILICA; AQUEOUS-SOLUTION; METHYLENE-BLUE; NANOPARTICLES OPTIMIZATION; ADSORPTION BEHAVIOR; LEAD IONS; EFFICIENT; SORPTION	GRAPHENE OXIDE; SELECTIVE REMOVAL; LIGAND; MERCURY; ADSORPTION; ISOTHERM	DIVALENT METAL-IONS; COVALENT ORGANIC FRAMEWORKS; MAGNETIC MESOPOROUS; SILICA; AQUEOUS-SOLUTION; METHYLENE-BLUE; NANOPARTICLES OPTIMIZATION; ADSORPTION BEHAVIOR; LEAD IONS; EFFICIENT; SORPTION	NASSERI, S (CORRESPONDING AUTHOR), UNIV TEHRAN MED SCI, DEPT ENVIRONM HLTH ENGN, POB 14155-6446, TEHRAN, IRAN.; KHAZAEI, MOHAMMAD, HAMADAN UNIV MED SCI, DEPT ENVIRONM HLTH ENGN, SCH PUBL HLTH, RES CTR HLTH SCI, HAMADAN, IRAN.; KHAZAEI, MOHAMMAD; NASSERI, SIMIN; NABIZADEH, RAMIN; NAZMARA, SHAHROKH, UNIV TEHRAN MED SCI, SCH PUBL HLTH, DEPT ENVIRONM HLTH ENGN, TEHRAN, IRAN.; NASSERI, SIMIN, UNIV TEH…	J. MOL. LIQ.	2,2-DITHIODISALICYLIC ACID-FUNCTIONALIZED MAGNETIC GRAPHENE OXIDE (FE3O4@DTSA\_GO) WAS USED FOR THE SELECTIVE REMOVAL OF HG(II) FROM AQUEOUS SOLUTION. THE EQUILIBRIUM WAS REACHED AFTER 10 MIN AND THE MAXIMUM HG(II) ADSORPTION CAPACITY OF THE FE3O4@DTSA\_GO NANOCOMPOSITE WAS 283.5 MG G(-1). THE HG(II) ADSORPTION ABILITY INCREASED WITH THE PH VALUE OF THE AQUEOUS SOLUTION. ISOTHERM AND KINETIC STUD…		NASSERI, S (CORRESPONDING AUTHOR), UNIV TEHRAN MED SCI, DEPT ENVIRONM HLTH ENGN, POB 14155-6446, TEHRAN, IRAN	10.1016/j.molliq.2018.05.048		0167-7322	JOURNAL OF MOLECULAR LIQUIDS	ENGLISH	28		189-198			ELSEVIER	ISI	SELECTIVE REMOVAL OF MERCURY(II) FROM WATER USING A 2,2-DITHIODISALICYLIC ACID-FUNCTIONALIZED GRAPHENE OXIDE NANOCOMPOSITE: KINETIC, THERMODYNAMIC, AND REUSABILITY STUDIES	ARTICLE		265	2018	KHAZAEI MOHAMMAD;NASSERI SIMIN;GANJALI MOHAMMAD REZA; KHOOBI MEHDI;NABIZADEH RAMIN;GHOLIBEGLOO ELHAM;NAZMARA; SHAHROKH	J MOL LIQ	2,2-Dithiodisalicylic acid-functionalized magnetic graphene oxide (Fe3O4@DTSA\_GO) was used for the selective removal of Hg(II) from aqueous solution. The equilibrium was reached after 10 min and the maximum Hg(II) adsorption capacity of the Fe3O4@DTSA\_GO nanocomposite was 283.5 mg g(-1). The Hg(II) adsorption ability increased with the pH value of the aqueous solution. Isotherm and kinetic stud…	Selective removal of mercury(II) from water using a 2,2-dithiodisalicylic acid-functionalized graphene oxide nanocomposite: Kinetic, thermodynamic, and reusability studies	Graphene oxide; Selective removal; Ligand; Mercury; Adsorption; Isotherm	none	UNIV TEHRAN MED SCI;HAMADAN UNIV MED SCI;UNIV TEHRAN MED SCI;UNIV TEHRAN MED SCI;UNIV TEHRAN;UNIV TEHRAN MED SCI;UNIV TEHRAN MED SCI;UNIV TEHRAN MED SCI;UNIV ZANJAN	UNIV TEHRAN MED SCI		KHAZAEI M, 2018, J MOL LIQ	KHAZAEI M, 2018, J MOL LIQ	RADARWEG 29, 1043 NX AMSTERDAM, NETHERLANDS	HAMADAN UNIVERSITY OF MEDICAL SCIENCES; TEHRAN UNIVERSITY OF MEDICAL SCIENCES; TEHRAN UNIVERSITY OF MEDICAL SCIENCES; UNIVERSITY OF TEHRAN; TEHRAN UNIVERSITY OF MEDICAL SCIENCES; TEHRAN UNIVERSITY OF MEDICAL SCIENCES; TEHRAN UNIVERSITY OF MEDICAL SCIENCES; UNIVERSITY ZANJAN		NASERISE@TUMS.AC.IR		2025-11-07	GQ6SF	1873-3166			TEHRAN UNIVERSITY OF MEDICAL SCIENCES, TEHRAN, IRAN [28232-27-01-94]	THIS RESEARCH IS PART OF THE PHD DISSERTATION OF THE FIRST AUTHOR AND HAS BEEN FINANCIALLY SUPPORTED BY A GRANT (NO, 28232-27-01-94) FROM THE TEHRAN UNIVERSITY OF MEDICAL SCIENCES, TEHRAN, IRAN. THE AUTHORS WOULD LIKE TO EXPRESS THEIR GRATITUDE TO THE DEPARTMENT OF ENVIRONMENTAL HEALTH ENGINEERING OF THE SCHOOL OF PUBLIC HEALTH (TEHRAN UNIVERSITY OF MEDICAL SCIENCES) FOR THEIR COLLABORATION.	SEP 1
SARKAR S;SARKAR S;BISWAS P	LEAD; MERCURY; WASTEWATER TREATMENT; IRON ORE SLIME; ADSORPTION; PHOTOCATALYTIC DEGRADATION; HEMATITE; SURFACE; FINES	LEAD; MERCURY; WASTEWATER TREATMENT; IRON ORE SLIME; ADSORPTION	PHOTOCATALYTIC DEGRADATION; ADSORPTION; HEMATITE; SURFACE; FINES	SARKAR, S (CORRESPONDING AUTHOR), R\&D TATA STEEL LTD, ENVIRONM RES GRP, JAMSHEDPUR, BIHAR, INDIA.; SARKAR, SANTANU; SARKAR, SUPRIYA; BISWAS, PINAKPANI, R\&D TATA STEEL LTD, ENVIRONM RES GRP, JAMSHEDPUR, BIHAR, INDIA.	J. ENVIRON. CHEM. ENG.	THE ENVIRONMENTAL POLLUTION IS RAPIDLY INCREASING DUE TO INDUSTRIALISATION. AMONG ALL TOXIC POLLUTANTS, HEAVY METAL IONS EASILY BIO-ACCUMULATE IN LIVING ORGANISM AND SUCH TYPE OF ACCUMULATION CAUSES DETRIMENTAL EFFECTS IN THE WHOLE LIFE CYCLE OF ALL LIVING INHABITANTS. PROTECTION OF THE ENVIRONMENT FOR ITS SUSTAINABLE DEVELOPMENT HAS LED TO SEVERAL INITIATIVES BEEN TAKEN FOR WASTEWATER TREATMENT.…		SARKAR, S (CORRESPONDING AUTHOR), R\&D TATA STEEL LTD, ENVIRONM RES GRP, JAMSHEDPUR, BIHAR, INDIA	10.1016/j.jece.2016.11.015			JOURNAL OF ENVIRONMENTAL CHEMICAL ENGINEERING	ENGLISH	12	1	38-44			ELSEVIER SCI LTD	ISI	EFFECTIVE UTILIZATION OF IRON ORE SLIME, A MINING WASTE AS ADSORBENT FOR REMOVAL OF PB(II) AND HG(II)	ARTICLE		5	2017	SARKAR SANTANU;SARKAR SUPRIYA;BISWAS PINAKPANI	J ENVIRON CHEM ENG	The environmental pollution is rapidly increasing due to industrialisation. Among all toxic pollutants, heavy metal ions easily bio-accumulate in living organism and such type of accumulation causes detrimental effects in the whole life cycle of all living inhabitants. Protection of the environment for its sustainable development has led to several initiatives been taken for wastewater treatment.…	Effective utilization of iron ore slime, a mining waste as adsorbent for removal of Pb(II) and Hg(II)	Lead; Mercury; Wastewater treatment; Iron ore slime; Adsorption	none	S (CORRESPONDING AUTHOR);ENVIRONM RES GRP	S (CORRESPONDING AUTHOR)		SARKAR S, 2017, J ENVIRON CHEM ENG	SARKAR S, 2017, J ENVIRON CHEM ENG	THE BOULEVARD, LANGFORD LANE, KIDLINGTON, OXFORD OX5 1GB, OXON, ENGLAND	TATA SONS; TATA STEEL LIMITED		SSARKAR05@GMAIL.COM		2025-11-07	ER6WS	2213-3437					FEB
MOHMOOD I;LOPES C;LOPES I;TAVARES ;DANIELA S D;SOARES A;DUARTE A;TRINDADE T;AHMAD I;PEREIRA E	MERCURY; REMEDIATION; ECOTOXICOLOGICAL EFFECTS; SEAWATER; NANOPARTICLES; DIETARY METHYLMERCURY; METAL REMOVAL; WASTE-WATER; HG2+ IONS; BEHAVIOR; INHIBITION; ADSORPTION; EFFICIENCY; PARTICLES; SEDIMENT	MERCURY; REMEDIATION; ECOTOXICOLOGICAL EFFECTS; SEAWATER; NANOPARTICLES	DIETARY METHYLMERCURY; METAL REMOVAL; WASTE-WATER; HG2+ IONS; BEHAVIOR; INHIBITION; ADSORPTION; EFFICIENCY; PARTICLES; SEDIMENT	MOHMOOD, I (CORRESPONDING AUTHOR), CESAM, CAMPUS SANTIAGO, P-3810193 AVEIRO, PORTUGAL.; MOHMOOD, I (CORRESPONDING AUTHOR), DEPT CHEM, CAMPUS SANTIAGO, P-3810193 AVEIRO, PORTUGAL.; MOHMOOD, IRAM; LOPES, ISABEL; TAVARES, DANIELA S.; SOARES, AMADEU M. V. M.; DUARTE, ARMANDO C.; PEREIRA, EDUARDA, CESAM, CAMPUS SANTIAGO, P-3810193 AVEIRO, PORTUGAL.; MOHMOOD, IRAM; LOPES, CLAUDIA B.; TAVARES, DANIELA S…	SCI. TOTAL ENVIRON.	THE STUDY AIMED TO EVALUATE THE EFFICIENCY OF DITHIOCARBAMATE FUNCTIONALIZED SILICA COATED MAGNETITE NANOPARTICLES (NPS) FOR HG DECONTAMINATION OF SALTWATER EITHER CONTAMINATED WITH HG ALONE OR WITH AS AND CD. FOR THIS, THE RESIDUAL LEVELS OF HG IN SEAWATER WERE ASSESSED AND HG-CONTAMINATED OR HG+ AS+ CD-CONTAMINATED SEAWATER TOXICITY TO AQUATIC BIOTA, BEFORE AND AFTER THE SORPTION PROCESS, WAS C…		MOHMOOD, I (CORRESPONDING AUTHOR), CESAM, CAMPUS SANTIAGO, P-3810193 AVEIRO, PORTUGAL	10.1016/j.scitotenv.2016.03.075		0048-9697	SCIENCE OF THE TOTAL ENVIRONMENT	ENGLISH	38		712-721			ELSEVIER SCIENCE BV	ISI	REMEDIATION OF MERCURY CONTAMINATED SALTWATER WITH FUNCTIONALIZED SILICA COATED MAGNETITE NANOPARTICLES	ARTICLE		557	2016	MOHMOOD IRAM;LOPES CLAUDIA B;LOPES ISABEL;TAVARES; DANIELA S;SOARES AMADEU M V M;DUARTE ARMANDO C; TRINDADE TITO;AHMAD IQBAL;PEREIRA EDUARDA	SCI TOTAL ENVIRON	The study aimed to evaluate the efficiency of dithiocarbamate functionalized silica coated magnetite nanoparticles (NPs) for Hg decontamination of saltwater either contaminated with Hg alone or with As and Cd. For this, the residual levels of Hg in seawater were assessed and Hg-contaminated or Hg+ As+ Cd-contaminated seawater toxicity to aquatic biota, before and after the sorption process, was c…	Remediation of mercury contaminated saltwater with functionalized silica coated magnetite nanoparticles	Mercury; Remediation; Ecotoxicological effects; Seawater; Nanoparticles	none	I (CORRESPONDING AUTHOR);I (CORRESPONDING AUTHOR);TAVARES;SOARES;TAVARES;INTERDISCIPLINARY CTR MARINE AND ENVIRONM RES;SOARES;UNIV MANCHESTER	I (CORRESPONDING AUTHOR)		MOHMOOD I, 2016, SCI TOTAL ENVIRON	MOHMOOD I, 2016, SCI TOTAL ENVIRON	PO BOX 211, 1000 AE AMSTERDAM, NETHERLANDS	UNIVERSIDADE DE AVEIRO; UNIVERSIDADE DE AVEIRO; UNIVERSIDADE DE AVEIRO; UNIVERSIDADE DO PORTO; UNIVERSIDADE DE AVEIRO; UNIVERSITY OF MANCHESTER				2025-11-07	DK7VZ	1879-1026			UNIVERSITY OF AVEIRO, FCT/MEC [UID/AMB/50017/2013, UID/CTM/50011/2013, UID/MULTI/04423/2013]; FEDER; PORTUGUESE FOUNDATION FOR SCIENCE AND TECHNOLOGY (FCT) THROUGH A FCT PROJECT [PTDC/MAR-BIO/3533/2012]; [SFRH/BD/74410/2010]; [SFRH/BPD/99453/2014]; FUNDAÇÃO PARA A CIÊNCIA E A TECNOLOGIA [SFRH/BPD/99453/2014, PTDC/MAR-BIO/3533/2012] FUNDING SOURCE: FCT	WE WOULD LIKE TO THANK UNIVERSITY OF AVEIRO, FCT/MEC FOR THE FINANCIAL SUPPORT TO CESAM, CICECO AND CIIMAR (UID/AMB/50017/2013; UID/CTM/50011/2013; UID/MULTI/04423/2013) THROUGH NATIONAL FUNDS AND, WHERE APPLICABLE, CO-FINANCED BY THE FEDER, WITHIN THE PT2020 PARTNERSHIP AGREEMENT.WE ALSO WOULD LIKE TO THANK THE NATIONAL FUNDS THROUGH THE PORTUGUESE FOUNDATION FOR SCIENCE AND TECHNOLOGY (FCT) THR…	JUL 1
LI L;TANG S;DING D;HU N;YANG ;SHENGYUAN S;HE S;WANG Y;TAN Y;SUN J	FE3O4 NANOPARTICLES; PYRENE; DETECTION; ADSORPTION; REMOVAL; HG(II); MAGNETIC NANOPARTICLES; PRECONCENTRATION; SPECTROMETRY; MERCURY; AGENT; ACID; DNA	FE3O4 NANOPARTICLES; PYRENE; DETECTION; ADSORPTION; REMOVAL; HG(II)	MAGNETIC NANOPARTICLES; PRECONCENTRATION; SPECTROMETRY; MERCURY; AGENT; ACID; DNA	DING, DX (CORRESPONDING AUTHOR), UNIV S CHINA, KEY DISCIPLINE LAB NATL DEF BIOTECHNOL URANIUM MI, HENGYANG 421001, PEOPLES R CHINA.; LI, LE; YANG, SHENGYUAN; HE, SHUYA; TAN, YAN, UNIV S CHINA, SCH PUBL HLTH, HENGYANG 421001, PEOPLES R CHINA.; TANG, SHUANGYANG, UNIV S CHINA, COLL MED, HENGYANG 421001, PEOPLES R CHINA.; LI, LE; DING, DEXIN; HU, NAN; WANG, YONGDONG; SUN, JING, UNIV S CHINA, KEY DISC…	J. NANOSCI. NANOTECHNOL.	IN THIS PAPER, A CORE SHELL STRUCTURED NANOCOMPOSITE MATERIAL WAS PREPARED FOR THE DETECTION, ADSORPTION AND REMOVAL OF HG(II) IONS IN AQUEOUS SOLUTION. THE CORE WAS MADE FROM FE3O4 NANOPARTICLES WITH SUPERPARAMAGNETIC BEHAVIOR AND THE OUTER SHELL WAS MADE FROM AMORPHOUS SILICA MODIFIED WITH PYRENE-BASED SENSING-PROBES. THE MATERIAL COULD DETECT AND ADSORB HG(II) IONS IN AQUEOUS SOLUTION DUE TO I…		DING, DX (CORRESPONDING AUTHOR), UNIV S CHINA, KEY DISCIPLINE LAB NATL DEF BIOTECHNOL URANIUM MI, HENGYANG 421001, PEOPLES R CHINA	10.1166/jnn.2012.6668		1533-4880	JOURNAL OF NANOSCIENCE AND NANOTECHNOLOGY	ENGLISH	10	11	8407-8414			AMER SCIENTIFIC PUBLISHERS	ISI	A CORE-SHELL STRUCTURED NANOCOMPOSITE MATERIAL FOR DETECTION, ADSORPTION AND REMOVAL OF HG(II) IONS IN WATER	ARTICLE		12	2012	LI LE;TANG SHUANGYANG;DING DEXIN;HU NAN;YANG; SHENGYUAN;HE SHUYA;WANG YONGDONG;TAN YAN;SUN JING	J NANOSCI NANOTECHNOL	In this paper, a core shell structured nanocomposite material was prepared for the detection, adsorption and removal of Hg(II) ions in aqueous solution. The core was made from Fe3O4 nanoparticles with superparamagnetic behavior and the outer shell was made from amorphous silica modified with pyrene-based sensing-probes. The material could detect and adsorb Hg(II) ions in aqueous solution due to i…	A Core-Shell Structured Nanocomposite Material for Detection, Adsorption and Removal of Hg(II) Ions in Water	Fe3O4 Nanoparticles; Pyrene; Detection; Adsorption; Removal; Hg(II)	none	UNIV S CHINA;UNIV S CHINA;UNIV S CHINA;UNIV S CHINA;HUNAN UNIV	UNIV S CHINA		LI L, 2012, J NANOSCI NANOTECHNOL	LI L, 2012, J NANOSCI NANOTECHNOL	26650 THE OLD RD, STE 208, VALENCIA, CA 91381-0751 USA	UNIVERSITY OF SOUTH CHINA; UNIVERSITY OF SOUTH CHINA; UNIVERSITY OF SOUTH CHINA; HUNAN UNIVERSITY				2025-11-07	074YM	1533-4899			NATIONAL NATURAL SCIENCE FOUNDATION OF CHINA [50774047]; SCIENTIFIC RESEARCH FOUNDATION OF EDUCATION DEPARTMENT [10A103]; DEPARTMENT OF SCIENCE AND TECHNOLOGY OF HUNAN PROVINCE [2010GK2025, 2012SK3154]; DEPARTMENT OF EDUCATION OF HUNAN PROVINCE [11C1078]	THIS RESEARCH IS SUPPORTED BY THE NATIONAL NATURAL SCIENCE FOUNDATION OF CHINA (GRANT NO. 50774047), THE SCIENTIFIC RESEARCH FOUNDATION OF EDUCATION DEPARTMENT (GRANT NO. 10A103), THE DEPARTMENT OF SCIENCE AND TECHNOLOGY OF HUNAN PROVINCE (GRANT NOS. 2010GK2025, 2012SK3154) AND THE DEPARTMENT OF EDUCATION OF HUNAN PROVINCE (GRANT NO. 11C1078).	NOV
ALSWAT A;ASHMALI A;ALQASMI T;ALHASSANI H;ALSHORIFI F	ADSORPTION; NANOCOMPOSITE; ACTIVATED CARBON; NANOPARTICLES; REMOVAL	ADSORPTION; NANOCOMPOSITE; ACTIVATED CARBON; NANOPARTICLES; REMOVAL		ALSHORIFI, FT (CORRESPONDING AUTHOR), UNIV SABA REG, FAC SCI, DEPT CHEM, MARIB, YEMEN.; ALSWAT, ABDULLAH A., SANAA UNIV, FAC EDUC \& APPL SCI ARHAB, DEPT CHEM, ARHAB, YEMEN.; ASHMALI, ASMA M.; ALQASMI, TASNEEM M.; ALHASSANI, HADEEL R.; ALSHORIFI, FARES T., UNIV SABA REG, FAC SCI, DEPT CHEM, MARIB, YEMEN.; ALSHORIFI, FARES T., SANAA UNIV, FAC SCI, DEPT CHEM, SANAA, YEMEN.	HELIYON	OVER YEARS, EXISTENCE OF TOXIC CHEMICAL HEAVY METAL IN AQUATIC SYSTEMS HAS MOTIVATED MORE RESEARCH STUDIES TOWARD THE PREPARATION OF EFFECTIVE STABLE SOLID ADSORBENTS FOR THE REMOVAL OF TOXIC CHEMICAL POLLUTANTS. THEREFORE, IN THE CURRENT RESEARCH STUDY, ACTIVATED CARBON ADSORBENT (AC) WAS SYNTHESIZED FROM YEMENI KHAT (CATHA EDULIS) LEAVES WHICH ARE CONSIDERED AS WASTE ACCUMULATED ON WASTE DISPOS…		ALSHORIFI, FT (CORRESPONDING AUTHOR), UNIV SABA REG, FAC SCI, DEPT CHEM, MARIB, YEMEN	10.1016/j.heliyon.2023.e14301			HELIYON	ENGLISH	10	3				CELL PRESS	ISI	ROLE OF NANOHYBRID NIO-FE3O4 IN ENHANCING THE ADSORPTIVE PERFORMANCE OF ACTIVATED CARBON SYNTHESIZED FROM YEMENI-KHAT LEAVE IN REMOVAL OF PB (II) AND HG (II) FROM AQUATIC SYSTEMS	ARTICLE		9	2023	ALSWAT ABDULLAH A;ASHMALI ASMA M;ALQASMI TASNEEM M; ALHASSANI HADEEL R;ALSHORIFI FARES T	HELIYON	Over years, existence of toxic chemical heavy metal in aquatic systems has motivated more research studies toward the preparation of effective stable solid adsorbents for the removal of toxic chemical pollutants. Therefore, in the current research study, activated carbon adsorbent (AC) was synthesized from Yemeni khat (catha edulis) leaves which are considered as waste accumulated on waste dispos…	Role of nanohybrid NiO-Fe3O4 in enhancing the adsorptive performance of activated carbon synthesized from Yemeni-Khat leave in removal of Pb (II) and Hg (II) from aquatic systems	Adsorption; Nanocomposite; Activated carbon; Nanoparticles; Removal	none	UNIV SABA REG;SANAA UNIV;UNIV SABA REG;SANAA UNIV	UNIV SABA REG		ALSWAT A, 2023, HELIYON	ALSWAT A, 2023, HELIYON	50 HAMPSHIRE ST, FLOOR 5, CAMBRIDGE, MA 02139 USA		E14301	PROF.ALSHORIFIFARES@GMAIL.COM		2025-11-07	D7LJ0	2405-8440	MAR 2023				MAR
DAVODI B;GHORBANI M;JAHANGIRI M	MERCURY; NANOCOMPOSITE; ADSORPTION; RSM; BOX-BEHNKEN DESIGN; OPTIMIZATION; WALLED CARBON NANOTUBES; HEAVY-METAL IONS; FE3O4 NANOPARTICLES; SEPARATION PROCESS; ACTIVATED CARBON; WASTE-WATER; REMOVAL; SORPTION; HG(II)	MERCURY; NANOCOMPOSITE; ADSORPTION; RSM; BOX-BEHNKEN DESIGN; OPTIMIZATION	WALLED CARBON NANOTUBES; HEAVY-METAL IONS; FE3O4 NANOPARTICLES; SEPARATION PROCESS; ACTIVATED CARBON; WASTE-WATER; REMOVAL; SORPTION; HG(II); OPTIMIZATION	JAHANGIRI, M (CORRESPONDING AUTHOR), SEMNAN UNIV, FAC CHEM ENGN GAS \& PETR, SEMNAN, IRAN.; GHORBANI, M (CORRESPONDING AUTHOR), BABOL NOSHIRVANI UNIV TECHNOL, DEPT CHEM ENGN, SHARIATI AVE, BABOL SAR, IRAN.; DAVODI, BEHZAD; JAHANGIRI, MANSOUR, SEMNAN UNIV, FAC CHEM ENGN GAS \& PETR, SEMNAN, IRAN.; GHORBANI, MOHSEN, BABOL NOSHIRVANI UNIV TECHNOL, DEPT CHEM ENGN, SHARIATI AVE, BABOL SAR, IRAN.	J. TAIWAN INST. CHEM. ENG.	THE AIM OF THIS STUDY IS TO EXAMINE THE POSSIBILITY OF USING SYNTHESIZED FUNCTIONAL POLYDOPAMINE@FE3O4 NANOCOMPOSITE (PDA@FE3O4) WITH MAGNETIC RESPONSE AND A SPECIAL SURFACE AREA AS THE MOST EFFECTIVE ADSORBENT TO REMOVE THE MERCURY (HG(II)) FROM AQUEOUS SOLUTION IN BATCH PROCESS (IN BATCH MODE/ IN BATCH PHASE/ IN BATH PROCESSING/ IN A BATCH PROCESS). THE STRUCTURAL CHARACTERIZATION OF THIS NANOC…		JAHANGIRI, M (CORRESPONDING AUTHOR), SEMNAN UNIV, FAC CHEM ENGN GAS \& PETR, SEMNAN, IRAN	10.1016/j.jtice.2017.07.024		1876-1070	JOURNAL OF THE TAIWAN INSTITUTE OF CHEMICAL ENGINEERS	ENGLISH	40		363-378			ELSEVIER	ISI	ADSORPTION OF MERCURY FROM AQUEOUS SOLUTION ON SYNTHETIC POLYDOPAMINE NANOCOMPOSITE BASED ON MAGNETIC NANOPARTICLES USING BOX-BEHNKEN DESIGN	ARTICLE		80	2017	DAVODI BEHZAD;GHORBANI MOHSEN;JAHANGIRI MANSOUR	J TAIWAN INST CHEM ENG	The aim of this study is to examine the possibility of using synthesized functional polydopamine@Fe3O4 nanocomposite (PDA@Fe3O4) with magnetic response and a special surface area as the most effective adsorbent to remove the mercury (Hg(II)) from aqueous solution in batch process (in batch mode/ in batch phase/ in bath processing/ in a batch process). The structural characterization of this nanoc…	Adsorption of mercury from aqueous solution on synthetic polydopamine nanocomposite based on magnetic nanoparticles using Box-Behnken design	Mercury; Nanocomposite; Adsorption; RSM; Box-Behnken design; Optimization	none	SEMNAN UNIV;BABOL NOSHIRVANI UNIV TECHNOL;SEMNAN UNIV;BABOL NOSHIRVANI UNIV TECHNOL	SEMNAN UNIV		DAVODI B, 2017, J TAIWAN INST CHEM ENG	DAVODI B, 2017, J TAIWAN INST CHEM ENG	RADARWEG 29, 1043 NX AMSTERDAM, NETHERLANDS	SEMNAN UNIVERSITY; BABOL NOSHIRVANI UNIVERSITY OF TECHNOLOGY		M.GHORBANI@NIT.AC.IR M.JAHANGIRI@SEMNAN.AC.IR		2025-11-07	FN1RP	1876-1089					NOV
HAN C;CAI W;TANG W;WANG G;LIANG C	LIQUID-SOLID GROWTH; AQUEOUS-SOLUTIONS; MRI CONTRAST; FE3O4; REMOVAL; NANOCRYSTALS; PARTICLES; ARRAYS; GAMMA-FE2O3; NANOWIRES		LIQUID-SOLID GROWTH; AQUEOUS-SOLUTIONS; MRI CONTRAST; FE3O4; REMOVAL; NANOCRYSTALS; PARTICLES; ARRAYS; GAMMA-FE2O3; NANOWIRES	CAI, WP (CORRESPONDING AUTHOR), CHINESE ACAD SCI, KEY LAB MAT PHYS, ANHUI KEY LAB NANOMAT \& NANOTECHNOL, INST SOLID STATE PHYS, HEFEI 230031, PEOPLES R CHINA.; HAN, CHENGLIANG; CAI, WEIPING; TANG, WEI; WANG, GUOZHONG; LIANG, CHANGHAO, CHINESE ACAD SCI, KEY LAB MAT PHYS, ANHUI KEY LAB NANOMAT \& NANOTECHNOL, INST SOLID STATE PHYS, HEFEI 230031, PEOPLES R CHINA.; HAN, CHENGLIANG, HEFEI UNIV, DEPT …	J. MATER. CHEM.	A FACILE AND GREEN ROUTE IS PRESENTED FOR MASS PRODUCTION OF ORIENTED MAGNETITE POROUS FIBERS (WITH >96\% IN YIELD), BASED ON THE PROTEIN ASSISTED HYDROTHERMAL METHOD IN CITRIC AQUEOUS SOLUTION. THE MAGNETITE FIBERS ARE NEARLY CYLINDRICAL IN SHAPE, SEVERAL TEN MICROMETRES IN LENGTH AND 120 NM IN MEAN DIAMETER. THE WHOLE SINGLE FIBERS ARE PACKED BY THE ULTRAFINE FE3O4 NANOPARTICLES WITH SIMILAR CR…		CAI, WP (CORRESPONDING AUTHOR), CHINESE ACAD SCI, KEY LAB MAT PHYS, ANHUI KEY LAB NANOMAT \& NANOTECHNOL, INST SOLID STATE PHYS, HEFEI 230031, PEOPLES R CHINA	10.1039/c1jm11048a		0959-9428	JOURNAL OF MATERIALS CHEMISTRY	ENGLISH	26	30	11188-11196			ROYAL SOC CHEMISTRY	ISI	PROTEIN ASSISTED HYDROTHERMAL SYNTHESIS OF ULTRAFINE MAGNETITE NANOPARTICLE BUILT-POROUS ORIENTED FIBERS AND THEIR STRUCTURALLY ENHANCED ADSORPTION TO TOXIC CHEMICALS IN SOLUTION	ARTICLE		21	2011	HAN CHENGLIANG;CAI WEIPING;TANG WEI;WANG GUOZHONG; LIANG CHANGHAO	J MATER CHEM	A facile and green route is presented for mass production of oriented magnetite porous fibers (with >96\% in yield), based on the protein assisted hydrothermal method in citric aqueous solution. The magnetite fibers are nearly cylindrical in shape, several ten micrometres in length and 120 nm in mean diameter. The whole single fibers are packed by the ultrafine Fe3O4 nanoparticles with similar cr…	Protein assisted hydrothermal synthesis of ultrafine magnetite nanoparticle built-porous oriented fibers and their structurally enhanced adsorption to toxic chemicals in solution		none	INST SOLID STATE PHYS;INST SOLID STATE PHYS;HEFEI UNIV	INST SOLID STATE PHYS		HAN C, 2011, J MATER CHEM	HAN C, 2011, J MATER CHEM	THOMAS GRAHAM HOUSE, SCIENCE PARK, MILTON RD, CAMBRIDGE CB4 0WF, CAMBS, ENGLAND	CHINESE ACADEMY OF SCIENCES; HEFEI INSTITUTES OF PHYSICAL SCIENCE, CAS; HEFEI UNIVERSITY		WPCAI@ISSP.AC.CN		2025-11-07	795KZ	1364-5501			NATIONAL BASIC RESEARCH PROGRAM OF CHINA [2007CB936604]	THIS WORK WAS FINANCIALLY SUPPORTED BY THE NATIONAL BASIC RESEARCH PROGRAM OF CHINA (GRANT NO 2007CB936604).
FAN L;ZHOU A;ZHONG L;ZHANG Z;LIU Y	CARBON NANOTUBES; MERCURY; SELECTIVE ADSORPTION; MAGNETIC PROPERTY; REUTILIZATION; WASTE-WATER; GRAPHENE OXIDE; HEAVY-METALS; REMOVAL; PB(II); IONS; CD(II); COMPOSITE; CHITOSAN; SORPTION	CARBON NANOTUBES; MERCURY; SELECTIVE ADSORPTION; MAGNETIC PROPERTY; REUTILIZATION	WASTE-WATER; GRAPHENE OXIDE; HEAVY-METALS; REMOVAL; PB(II); IONS; CD(II); COMPOSITE; CHITOSAN; SORPTION	LIU, Y (CORRESPONDING AUTHOR), SICHUAN NORMAL UNIV, COLL CHEM \& MAT SCI, CHENGDU 610066, SICHUAN, PEOPLES R CHINA.; FAN, LU; ZHOU, ANLAN; ZHONG, LINRUI; ZHANG, ZHENG; LIU, YONG, SICHUAN NORMAL UNIV, COLL CHEM \& MAT SCI, CHENGDU 610066, SICHUAN, PEOPLES R CHINA.; FAN, LU; LIU, YONG, KEY LAB TREATMENT SPECIAL WASTEWATER SICHUAN PROV, CHENGDU 610066, SICHUAN, PEOPLES R CHINA.	CHEMOSPHERE	IN THIS STUDY, A NOVEL ADSORBENT THIOL FUNCTIONALIZED MAGNETIC CARBON NANOTUBES (CNTS-SH@FE3O4) WAS SYNTHESIZED TO OVERCOME SOMEWHAT EXISTING DIFFICULTIES DURING THE HG(II) ADSORPTION PROCESS, INCLUDING LOW EFFICIENCY AND SELECTIVITY, NARROW FEASIBLE PH RANGE AND DIFFICULT TO SEPARATE AND REUSE. THE HG(II) ADSORPTION PERFORMANCE OF CNTS-SH@FE3O4 WAS EVALUATED USING BATCH EXPERIMENT AND ITS PHYSIO…		LIU, Y (CORRESPONDING AUTHOR), SICHUAN NORMAL UNIV, COLL CHEM \& MAT SCI, CHENGDU 610066, SICHUAN, PEOPLES R CHINA	10.1016/j.chemosphere.2019.03.154		0045-6535	CHEMOSPHERE	ENGLISH	68		405-412			PERGAMON-ELSEVIER SCIENCE LTD	ISI	SELECTIVE AND EFFECTIVE ADSORPTION OF HG(II) FROM AQUEOUS SOLUTION OVER WIDE PH RANGE BY THIOL FUNCTIONALIZED MAGNETIC CARBON NANOTUBES	ARTICLE		226	2019	FAN LU;ZHOU ANLAN;ZHONG LINRUI;ZHANG ZHENG;LIU YONG	CHEMOSPHERE	In this study, a novel adsorbent thiol functionalized magnetic carbon nanotubes (CNTs-SH@Fe3O4) was synthesized to overcome somewhat existing difficulties during the Hg(II) adsorption process, including low efficiency and selectivity, narrow feasible pH range and difficult to separate and reuse. The Hg(II) adsorption performance of CNTs-SH@Fe3O4 was evaluated using batch experiment and its physio…	Selective and effective adsorption of Hg(II) from aqueous solution over wide pH range by thiol functionalized magnetic carbon nanotubes	Carbon nanotubes; Mercury; Selective adsorption; Magnetic property; Reutilization	none	SICHUAN NORMAL UNIV;SICHUAN NORMAL UNIV;KEY LAB TREATMENT SPECIAL WASTEWATER SICHUAN PROV	SICHUAN NORMAL UNIV		FAN L, 2019, CHEMOSPHERE	FAN L, 2019, CHEMOSPHERE	THE BOULEVARD, LANGFORD LANE, KIDLINGTON, OXFORD OX5 1GB, ENGLAND	SICHUAN NORMAL UNIVERSITY		LIUYONG75@SICNU.EDU.CN		2025-11-07	HZ2WM	1879-1298			NATIONAL NATURAL SCIENCE FOUNDATION OF CHINA [51878427]; FOUNDATION OF SICHUAN EDUCATIONAL COMMITTEE [18ZA0397]; SICHUAN SCIENCE AND TECHNOLOGY PROGRAME [2019YFH0111]; SICHUAN ENGINEERING LABORATORY OF LIVESTOCK MANURE TREATMENT AND RECYCLING [140028001]	THIS RESEARCH WAS FINANCIALLY SUPPORTED BY THE NATIONAL NATURAL SCIENCE FOUNDATION OF CHINA (NO. 51878427), THE FOUNDATION OF SICHUAN EDUCATIONAL COMMITTEE (NO. 18ZA0397), SICHUAN SCIENCE AND TECHNOLOGY PROGRAME (2019YFH0111) AND SICHUAN ENGINEERING LABORATORY OF LIVESTOCK MANURE TREATMENT AND RECYCLING (140028001).	JUL
SANCHEZ J;JOSON P;MORALES V;MARIENETTE M	HYBRID NANOPARTICLE SYSTEMS; MERCURY POLLUTION; UV-VIS SPECTROSCOPY; POLLUTANT ADSORPTION; AQUEOUS-SOLUTION; REMOVAL; WATER; IONS; NANOMATERIALS; ESTUARY	HYBRID NANOPARTICLE SYSTEMS; MERCURY POLLUTION; UV-VIS SPECTROSCOPY; POLLUTANT ADSORPTION	AQUEOUS-SOLUTION; REMOVAL; WATER; IONS; NANOMATERIALS; ESTUARY	SANCHEZ, JRG (CORRESPONDING AUTHOR), ATENEO MANILA UNIV, LOYOLA SCH, SCH SCI \& ENGN, DEPT BIOL, QUEZON CITY, PHILIPPINES.; SANCHEZ, JOSEPH RAYMUND G.; JOSON, PAULO RAFAEL S., ATENEO MANILA UNIV, LOYOLA SCH, SCH SCI \& ENGN, DEPT BIOL, QUEZON CITY, PHILIPPINES.; MORALES VEGA, MARIENETTE, UNIV PHILIPPINES, COLL SCI, MAT SCI \& ENGN PROGRAM, QUEZON CITY, PHILIPPINES.	J. ENVIRON. SCI. HEALTH PART A-TOXIC/HAZARD. SUBST. ENVIRON. ENG.	MERCURY POLLUTION IS A RAMPANT PROBLEM IN MANY ECONOMICALLY SIGNIFICANT PHILIPPINE FRESHWATER ECOSYSTEMS. COMMUNITIES DEPENDENT ON THESE FRESHWATER SOURCES ARE THEREFORE AT RISK FOR EXPOSURE TO HARMFUL LEVELS OF MERCURY. VARIOUS FORMULATIONS OF A NOVEL GOLD-GRAPHENE OXIDE-IRON OXIDE (AU-GO-FE3O4) HYBRID NANOPARTICLE SYSTEM WERE CREATED AND SUBJECTED TO UV-VIS SPECTROSCOPY TO DETERMINE OPTIMAL FOR…		SANCHEZ, JRG (CORRESPONDING AUTHOR), ATENEO MANILA UNIV, LOYOLA SCH, SCH SCI \& ENGN, DEPT BIOL, QUEZON CITY, PHILIPPINES	10.1080/10934529.2019.1681219		1093-4529	JOURNAL OF ENVIRONMENTAL SCIENCE AND HEALTH PART A-TOXIC/HAZARDOUS SUBSTANCES \& ENVIRONMENTAL ENGINEERING	ENGLISH	3	3	216-223			TAYLOR \& FRANCIS INC	ISI	STUDYING ABSORBANCE PROPERTIES AND MERCURY REMEDIATION CAPABILITIES OF GOLD-GRAPHENE OXIDE-IRON OXIDE (AU-GO-FE3O4) NANOPARTICLE SYSTEMS	ARTICLE		55	2020	SANCHEZ JOSEPH RAYMUND G;JOSON PAULO RAFAEL S;MORALES VEGA; MARIENETTE	J ENVIRON SCI HEALTH PART A-TOXIC/HAZARD SUBST ENVIRON ENG	Mercury pollution is a rampant problem in many economically significant Philippine freshwater ecosystems. Communities dependent on these freshwater sources are therefore at risk for exposure to harmful levels of mercury. Various formulations of a novel gold-graphene oxide-iron oxide (Au-GO-Fe3O4) hybrid nanoparticle system were created and subjected to UV-Vis spectroscopy to determine optimal for…	Studying absorbance properties and mercury remediation capabilities of gold-graphene oxide-iron oxide (Au-GO-Fe3O4) nanoparticle systems	Hybrid nanoparticle systems; mercury pollution; UV-Vis spectroscopy; pollutant adsorption	none	ATENEO MANILA UNIV;ATENEO MANILA UNIV;UNIV PHILIPPINES	ATENEO MANILA UNIV		SANCHEZ J, 2020, J ENVIRON SCI HEALTH PART A-TOXIC/HAZARD SUBST ENVIRON ENG	SANCHEZ J, 2020, J ENVIRON SCI HEALTH PART A-TOXIC/HAZARD SUBST ENVIRON ENG	530 WALNUT STREET, STE 850, PHILADELPHIA, PA 19106 USA	ATENEO DE MANILA UNIVERSITY; UNIVERSITY OF THE PHILIPPINES SYSTEM; UNIVERSITY OF THE PHILIPPINES DILIMAN		RAYMUND.SANCHEZ@OBF.ATENEO.EDU		2025-11-07	KK6JB	1532-4117	OCT 2019				FEB 23
HE C;QU J;YU Z;CHEN D;SU ;TIANTIAN T;HE L;ZHAO Z;ZHOU C;HONG P;LI Y;SUN S;LI C	MERCURY ADSORPTION; HUMIC ACID; FE3O4 NANOPARTICLES; OYSTER SHELL; FE3O4 MAGNETIC NANOPARTICLES; HUMIC-ACID; METAL-IONS; ADSORPTION; MERCURY; SHELL; WATER; CARBON; COPPER; PARTICLES	MERCURY ADSORPTION; HUMIC ACID; FE3O4 NANOPARTICLES; OYSTER SHELL	FE3O4 MAGNETIC NANOPARTICLES; HUMIC-ACID; METAL-IONS; ADSORPTION; MERCURY; SHELL; WATER; CARBON; COPPER; PARTICLES	LI, CY (CORRESPONDING AUTHOR), GUANGDONG OCEAN UNIV, SCH CHEM \& ENVIRONM, ZHANJIANG 524088, PEOPLES R CHINA.; LI, CY (CORRESPONDING AUTHOR), GUANGDONG OCEAN UNIV, SHENZHEN INST, SHENZHEN 518108, PEOPLES R CHINA.; LI, CY (CORRESPONDING AUTHOR), GUANGDONG MODERN AGR SCI \& TECHNOL INNOVAT CTR, ZHANJIANG 524088, PEOPLES R CHINA.; HE, CHUXIAN; HE, LEI; ZHAO, ZIKE; LI, YONG; SUN, SHENGLI; LI, CHENGYO…	NANOMATERIALS	MICRO-NANO COMPOSITE MATERIAL WAS PREPARED TO ADSORB HG(II) IONS VIA THE CO-PRECIPITATION METHOD. OYSTER SHELL (OS), FE3O4 NANOPARTICLES, AND HUMIC ACID (HA) WERE USED AS THE RAW MATERIALS. THE ADHESION OF NANOPARTICLES TO OS DISPLAYED BY SCANNING ELECTRON MICROSCOPY (SEM), THE APPEARANCE OF THE (311) PLANE OF STANDARD FE3O4 DERIVED FROM X-RAY DIFFRACTION (XRD), AND THE TRANSFORMATION OF PORE SIZ…		LI, CY (CORRESPONDING AUTHOR), GUANGDONG OCEAN UNIV, SCH CHEM \& ENVIRONM, ZHANJIANG 524088, PEOPLES R CHINA	10.3390/nano9070953			NANOMATERIALS	ENGLISH	20	7				MDPI	ISI	PREPARATION OF MICRO-NANO MATERIAL COMPOSED OF OYSTER SHELL/FE3O4 NANOPARTICLES/HUMIC ACID AND ITS APPLICATION IN SELECTIVE REMOVAL OF HG(II)	ARTICLE		9	2019	HE CHUXIAN;QU JUNHAO;YU ZIHUA;CHEN DAIHUAN;SU; TIANTIAN;HE LEI;ZHAO ZIKE;ZHOU CHUNXIA;HONG PENGZHI;LI YONG;SUN SHENGLI;LI CHENGYONG	NANOMATERIALS	Micro-nano composite material was prepared to adsorb Hg(II) ions via the co-precipitation method. Oyster shell (OS), Fe3O4 nanoparticles, and humic acid (HA) were used as the raw materials. The adhesion of nanoparticles to OS displayed by scanning electron microscopy (SEM), the appearance of the (311) plane of standard Fe3O4 derived from X-ray diffraction (XRD), and the transformation of pore siz…	Preparation of Micro-Nano Material Composed of Oyster Shell/Fe3O4 Nanoparticles/Humic Acid and Its Application in Selective Removal of Hg(II)	mercury adsorption; humic acid; Fe3O4 nanoparticles; oyster shell	none	GUANGDONG OCEAN UNIV;GUANGDONG OCEAN UNIV;GUANGDONG MODERN AGR SCI AND TECHNOL INNOVAT CTR;GUANGDONG OCEAN UNIV;GUANGDONG OCEAN UNIV;GUANGDONG OCEAN UNIV;GUANGDONG MODERN AGR SCI AND TECHNOL INNOVAT CTR	GUANGDONG OCEAN UNIV		HE C, 2019, NANOMATERIALS	HE C, 2019, NANOMATERIALS	MDPI AG, GROSSPETERANLAGE 5, CH-4052 BASEL, SWITZERLAND	GUANGDONG OCEAN UNIVERSITY; GUANGDONG OCEAN UNIVERSITY; GUANGDONG OCEAN UNIVERSITY	953	CYLI@GDOU.EDU.CN		2025-11-07	IN9IN	2079-4991			NATIONAL NATURAL SCIENCE FOUNDATION OF CHINA [21874029]; GUANGDONG YANGFAN PROGRAM [201635018]; GUANGDONG SPECIAL SUPPORT PROGRAM [2017TQ04N706]; SCIENCE AND TECHNOLOGY PLANNING PROJECT OF GUANGDONG PROVINCE [2016A020210114]; TECHNOLOGY PLANNING PROJECT OF ZHANJIANG CITY [2018A02014, 2016C01002, A18013]; SCIENCE AND TECHNOLOGY PLANNING PROJECT OF SHENZHEN CITY [JCYJ20170818111719650]; INDUSTRIAL …	THIS RESEARCH WAS FUNDED BY THE NATIONAL NATURAL SCIENCE FOUNDATION OF CHINA (21874029), GUANGDONG YANGFAN PROGRAM (201635018), GUANGDONG SPECIAL SUPPORT PROGRAM (2017TQ04N706), SCIENCE AND TECHNOLOGY PLANNING PROJECT OF GUANGDONG PROVINCE (2016A020210114), TECHNOLOGY PLANNING PROJECT OF ZHANJIANG CITY (2018A02014, 2016C01002, A18013), SCIENCE AND TECHNOLOGY PLANNING PROJECT OF SHENZHEN CITY (JCY…	JUL
BEHJATI M;BAGHDADI M;KARBASSI A	MERCURY; DITHIOCARBAMATE; REMOVAL; WATER; ADSORPTION; HEAVY-METAL IONS; CARBON NANOTUBES; ACTIVATED CARBON; AQUEOUS-SOLUTION; EFFICIENT REMOVAL; ADSORBENT; NANOPARTICLES; SILICA	MERCURY; DITHIOCARBAMATE; REMOVAL; WATER; ADSORPTION	HEAVY-METAL IONS; CARBON NANOTUBES; ACTIVATED CARBON; AQUEOUS-SOLUTION; EFFICIENT REMOVAL; ADSORPTION; WATER; ADSORBENT; NANOPARTICLES; SILICA	KARBASSI, A (CORRESPONDING AUTHOR), UNIV TEHRAN, GRAD FAC ENVIRONM, DEPT ENVIRONM ENGN, TEHRAN, IRAN.; BEHJATI, MOHAMAD; BAGHDADI, MAJID; KARBASSI, ABDOLREZA, UNIV TEHRAN, GRAD FAC ENVIRONM, DEPT ENVIRONM ENGN, TEHRAN, IRAN.	J. ENVIRON. MANAGE.	IN THIS STUDY, AN EFFICIENT ADSORBENT WAS PROPOSED FOR THE REMOVAL OF MERCURY FROM SALINE WATER CONTAMINATED WITH MERCURY IONS. FE3O4 NANOPARTICLES WERE MODIFIED USING TETRAETHYLENEPENTAMINE AND CARBON DISULFIDE TO INCORPORATE DITHIOCARBAMATE FUNCTIONAL GROUP ON THE SURFACE OF THE ADSORBENT. CHNS ANALYSIS CONFIRMED SUCCESSFUL MODIFICATION OF MAGNETIC NANOPARTICLES. THE XRD PATTERN OF ADSORBENT IN…		KARBASSI, A (CORRESPONDING AUTHOR), UNIV TEHRAN, GRAD FAC ENVIRONM, DEPT ENVIRONM ENGN, TEHRAN, IRAN	10.1016/j.jenvman.2018.02.052		0301-4797	JOURNAL OF ENVIRONMENTAL MANAGEMENT	ENGLISH	52		66-78			ACADEMIC PRESS LTD- ELSEVIER SCIENCE LTD	ISI	REMOVAL OF MERCURY FROM CONTAMINATED SALINE WASTERS USING DITHIOCARBAMATE FUNCTIONALIZED-MAGNETIC NANOCOMPOSITE	ARTICLE		213	2018	BEHJATI MOHAMAD;BAGHDADI MAJID;KARBASSI ABDOLREZA	J ENVIRON MANAGE	In this study, an efficient adsorbent was proposed for the removal of mercury from saline water contaminated with mercury ions. Fe3O4 nanoparticles were modified using tetraethylenepentamine and carbon disulfide to incorporate dithiocarbamate functional group on the surface of the adsorbent. CHNS analysis confirmed successful modification of magnetic nanoparticles. The XRD pattern of adsorbent in…	Removal of mercury from contaminated saline wasters using dithiocarbamate functionalized-magnetic nanocomposite	Mercury; Dithiocarbamate; Removal; Water; Adsorption	none	UNIV TEHRAN;UNIV TEHRAN	UNIV TEHRAN		BEHJATI M, 2018, J ENVIRON MANAGE	BEHJATI M, 2018, J ENVIRON MANAGE	24-28 OVAL RD, LONDON NW1 7DX, ENGLAND	UNIVERSITY OF TEHRAN		BEHJATI\_MOHAMAD@UT.AC.IR M.BAGHDADI@UT.AC.IR AKARBASI@UT.AC.IR		2025-11-07	GB6OB	1095-8630					MAY 1
NEMATI Y;ZAHEDI P;BAGHDADI M;RAMEZANI ;SAHAR S	CHITOSAN; MERCURY; REMOVAL; MICROFLUIDICS; IONIC GELATION; NANOPARTICLE; MERCURY IONS; ADSORPTION PROPERTIES; SELECTIVE REMOVAL; HG(II) REMOVAL; WASTE-WATER; DYES; KINETICS; MONODISPERSE; EQUILIBRIUM; ISOTHERM	CHITOSAN; MERCURY; REMOVAL; MICROFLUIDICS; IONIC GELATION; NANOPARTICLE	MERCURY IONS; ADSORPTION PROPERTIES; SELECTIVE REMOVAL; HG(II) REMOVAL; WASTE-WATER; DYES; KINETICS; MONODISPERSE; EQUILIBRIUM; ISOTHERM	ZAHEDI, P (CORRESPONDING AUTHOR), UNIV TEHRAN, COLL ENGN, SCH CHEM ENGN, NANOBIOPOLYMERS RES LAB, POB 11155-4563, TEHRAN, IRAN.; NEMATI, YASAMAN; ZAHEDI, PAYAM; RAMEZANI, SAHAR, UNIV TEHRAN, COLL ENGN, SCH CHEM ENGN, NANOBIOPOLYMERS RES LAB, POB 11155-4563, TEHRAN, IRAN.; BAGHDADI, MAJID, UNIV TEHRAN, COLL ENGN, SCH ENVIRONM, POB 141785-3111, TEHRAN, IRAN.	J. ENVIRON. MANAGE.	THIS WORK AIMED AT PRODUCING NANOPARTICLES (NPS) BASED ON THIOL-FUNCTIONALIZED CHITOSAN (CS) USING CAPILLARY MICROFLUIDIC (MF) DEVICE COMBINED WITH IONIC GELATION METHOD TO ADSORB MERCURY ION [HG (II)] FROM AQUEOUS SOLUTIONS. IN THIS LINE, CS WAS FUNCTIONALIZED WITH EPICHLOROHYDRIN/CYSTEAMINIUM CHLORIDE (2.73 M RATIO) FOLLOWED BY FABRICATING NPS VIA MF AND BULK MIXING (BM) METHODS. TO CHARACTERIZ…		ZAHEDI, P (CORRESPONDING AUTHOR), UNIV TEHRAN, COLL ENGN, SCH CHEM ENGN, NANOBIOPOLYMERS RES LAB, POB 11155-4563, TEHRAN, IRAN	10.1016/j.jenvman.2019.02.124		0301-4797	JOURNAL OF ENVIRONMENTAL MANAGEMENT	ENGLISH	38		166-177			ACADEMIC PRESS LTD- ELSEVIER SCIENCE LTD	ISI	MICROFLUIDICS COMBINED WITH IONIC GELATION METHOD FOR PRODUCTION OF NANOPARTICLES BASED ON THIOL-FUNCTIONALIZED CHITOSAN TO ADSORB HG (II) FROM AQUEOUS SOLUTIONS	ARTICLE		238	2019	NEMATI YASAMAN;ZAHEDI PAYAM;BAGHDADI MAJID;RAMEZANI; SAHAR	J ENVIRON MANAGE	This work aimed at producing nanoparticles (NPs) based on thiol-functionalized chitosan (CS) using capillary microfluidic (MF) device combined with ionic gelation method to adsorb mercury ion [Hg (II)] from aqueous solutions. In this line, CS was functionalized with epichlorohydrin/cysteaminium chloride (2.73 M ratio) followed by fabricating NPs via MF and bulk mixing (BM) methods. To characteriz…	Microfluidics combined with ionic gelation method for production of nanoparticles based on thiol-functionalized chitosan to adsorb Hg (II) from aqueous solutions	Chitosan; Mercury; Removal; Microfluidics; Ionic gelation; Nanoparticle	none	UNIV TEHRAN;UNIV TEHRAN;UNIV TEHRAN	UNIV TEHRAN		NEMATI Y, 2019, J ENVIRON MANAGE	NEMATI Y, 2019, J ENVIRON MANAGE	24-28 OVAL RD, LONDON NW1 7DX, ENGLAND	UNIVERSITY OF TEHRAN; UNIVERSITY OF TEHRAN		PHDZAHEDI@UT.AC.IR		2025-11-07	HT1AM	1095-8630			UNIVERSITY OF TEHRAN SCIENCE AND TECHNOLOGY PARK [5457205]	THE AUTHORS WOULD LIKE TO ACKNOWLEDGE THE FINANCIAL SUPPORT OF UNIVERSITY OF TEHRAN SCIENCE AND TECHNOLOGY PARK FOR THIS RESEARCH UNDER GRANT NO. 5457205. WE WOULD ALSO LIKE TO GRATITUDE TO RESEARCH COUNCIL OF UNIVERSITY OF TEHRAN FOR THE EXPERIMENTAL SERVICES.	MAY 15
MAHMOUD M;SAAD E;SOLIMAN M;ABDELWAHAB M	ZEROVALENT IRON; ETHYLENEDIAMINE; 3-AMINOPROPYLTRIM-ETHOXYSILANE; 2-PYRIDENECARBOXALDEHYDE; ADSORPTION; HEAVY-METAL REMOVAL; AQUEOUS-SOLUTION; EFFICIENT REMOVAL; CARBON; NANOTUBES; PB II; EQUILIBRIUM; SORPTION; ANTIOXIDANT; BIOSORBENT	ZEROVALENT IRON; ETHYLENEDIAMINE; 3-AMINOPROPYLTRIM-ETHOXYSILANE; 2-PYRIDENECARBOXALDEHYDE; ADSORPTION	HEAVY-METAL REMOVAL; AQUEOUS-SOLUTION; EFFICIENT REMOVAL; CARBON; NANOTUBES; PB II; ADSORPTION; EQUILIBRIUM; SORPTION; ANTIOXIDANT; BIOSORBENT	ABDELWAHAB, MS (CORRESPONDING AUTHOR), AIN SHAMS UNIV, DEPT CHEM, CAIRO, EGYPT.; MAHMOUD, MOHAMED E., ALEXANDRIA UNIV, DEPT CHEM, ALEXANDRIA, EGYPT.; SAAD, EBTISSAM AHMED; ABDELWAHAB, MOHAMED S., AIN SHAMS UNIV, DEPT CHEM, CAIRO, EGYPT.; SOLIMAN, MOHAMED ALI, ATOM ENERGY AUTHOR, EGYPT RES REACTOR 2, CAIRO, EGYPT.	SEP. SCI. TECHNOL.	THE ADSORPTION TECHNOLOGY INVOLVING NANO ZEROVALENT IRON (NZVI) HAS BEEN WIDELY EMPLOYED TO REMEDIATE POLLUTED WATER BASED ON A NUMBER OF ECONOMIC ASPECTS. HOWEVER, THIS TECHNOLOGY IS FACING A HIGH CHALLENGE IN THE REMOVAL PROCESS OF POLLUTANTS DUE TO HYDROLYSIS AND STABILITY CHARACTERISTICS OF ZEROVALENT IRON. THEREFORE, THIS STUDY IS AIMED TO DEMONSTRATE A METHOD FOR ENCAPSULATION AND FUNCTIONA…		ABDELWAHAB, MS (CORRESPONDING AUTHOR), AIN SHAMS UNIV, DEPT CHEM, CAIRO, EGYPT	10.1080/01496395.2018.1529045		0149-6395	SEPARATION SCIENCE AND TECHNOLOGY	ENGLISH	7	7	1125-1140			TAYLOR \& FRANCIS INC	ISI	ENVIRONMENTAL WATER REMEDIATION USING COVALENTLY FUNCTIONALIZED ZEROVALENT IRON NANOCOMPOSITES WITH 2-PYRIDINECARBOXALDEHYDE VIA 3-AMINOPROPYLTRIMETHOXYSILANE AND ETHYLENEDIAMINE	ARTICLE		54	2019	MAHMOUD MOHAMED E;SAAD EBTISSAM AHMED;SOLIMAN MOHAMED ALI;ABDELWAHAB MOHAMED S	SEP SCI TECHNOL	The adsorption technology involving nano zerovalent iron (NZVI) has been widely employed to remediate polluted water based on a number of economic aspects. However, this technology is facing a high challenge in the removal process of pollutants due to hydrolysis and stability characteristics of zerovalent iron. Therefore, this study is aimed to demonstrate a method for encapsulation and functiona…	Environmental water remediation using covalently functionalized zerovalent iron nanocomposites with 2-pyridinecarboxaldehyde via 3-aminopropyltrimethoxysilane and ethylenediamine	Zerovalent iron; ethylenediamine; 3-aminopropyltrim-ethoxysilane; 2-pyridenecarboxaldehyde; adsorption	none	AIN SHAMS UNIV;ALEXANDRIA UNIV;AIN SHAMS UNIV;	AIN SHAMS UNIV		MAHMOUD M, 2019, SEP SCI TECHNOL	MAHMOUD M, 2019, SEP SCI TECHNOL	530 WALNUT STREET, STE 850, PHILADELPHIA, PA 19106 USA	EGYPTIAN KNOWLEDGE BANK (EKB); ALEXANDRIA UNIVERSITY; EGYPTIAN KNOWLEDGE BANK (EKB); AIN SHAMS UNIVERSITY; EGYPTIAN KNOWLEDGE BANK (EKB); EGYPTIAN ATOMIC ENERGY AUTHORITY (EAEA)		MOHAMED-SAID-SCIENCE@HOTMAIL.COM		2025-11-07	HQ2RG	1520-5754					MAY 3
SADEGH H;ALI G;MAKHLOUF A;CHONG K;ALHARBI N;AGARWAL S;GUPTA ;VINOD K V	CARBON NANOTUBES; NANOCOMPOSITE; WATER TREATMENT; ADSORPTION; HG(II); REMOVAL; POLLUTANTS; HEAVY-METAL IONS; WALLED CARBON NANOTUBES; LOW-COST ADSORBENTS; PALM; KERNEL SHELL; ACTIVATED CARBON; WASTE-WATER; AQUEOUS-SOLUTION; MAGNETIC; CARBON; METHYLENE-BLUE; ASSISTED REMOVAL	CARBON NANOTUBES; NANOCOMPOSITE; WATER TREATMENT; ADSORPTION; HG(II); REMOVAL; POLLUTANTS	HEAVY-METAL IONS; WALLED CARBON NANOTUBES; LOW-COST ADSORBENTS; PALM; KERNEL SHELL; ACTIVATED CARBON; WASTE-WATER; AQUEOUS-SOLUTION; MAGNETIC; CARBON; METHYLENE-BLUE; ASSISTED REMOVAL	SADEGH, H (CORRESPONDING AUTHOR), WEST POMERANIAN UNIV TECHNOL, FAC CHEM TECHNOL \& ENGN, DIV BIOMAT \& MICROBIOL TECHNOL, AL PIASTOW 45, SZCZECIN, POLAND.; ALI, GAM (CORRESPONDING AUTHOR), AL AZHAR UNIV, FAC SCI, CHEM DEPT, ASSIUT 71524, EGYPT.; GUPTA, VK (CORRESPONDING AUTHOR), UNIV JOHANNESBURG, DEPT APPL CHEM, JOHANNESBURG, SOUTH AFRICA.; SADEGH, HAMIDREZA, WEST POMERANIAN UNIV TECHNOL, FAC C…	J. MOL. LIQ.	MAGNETIC CARBON NANOTUBES COMPOSITE (MWCNTS-FE3O4) WAS SUCCESSFULLY PREPARED AND CHARACTERIZED USING DIFFERENT TECHNIQUES. MWCNTS-FE3O4 DISPLAYS ENTANGLED NETWORK OF OXIDIZED MWCNTS ATTACHED WITH FE3O4 CLUSTERS WITH SPECIFIC SURFACE AREA OF 92 M(2) G(-1). THE ADSORPTION PERFORMANCE OF AS PREPARED COMPOSITE WAS INVESTIGATED FOR HG(II) REMOVAL. SEVERAL EXPERIMENTAL FACTORS AFFECTING HG(II) ADSORPTI…		SADEGH, H (CORRESPONDING AUTHOR), WEST POMERANIAN UNIV TECHNOL, FAC CHEM TECHNOL \& ENGN, DIV BIOMAT \& MICROBIOL TECHNOL, AL PIASTOW 45, SZCZECIN, POLAND	10.1016/j.molliq.2018.03.012		0167-7322	JOURNAL OF MOLECULAR LIQUIDS	ENGLISH	126		345-353			ELSEVIER	ISI	MWCNTS-FE3O4 NANOCOMPOSITE FOR HG(II) HIGH ADSORPTION EFFICIENCY	ARTICLE		258	2018	SADEGH HAMIDREZA;ALI GOMAA A M;MAKHLOUF ABDEL SALAM HAMDY;CHONG KWOK FENG;ALHARBI NJUD S;AGARWAL SHILPI;GUPTA; VINOD KUMAR	J MOL LIQ	Magnetic carbon nanotubes composite (MWCNTs-Fe3O4) was successfully prepared and characterized using different techniques. MWCNTs-Fe3O4 displays entangled network of oxidized MWCNTs attached with Fe3O4 clusters with specific surface area of 92 m(2) g(-1). The adsorption performance of as prepared composite was investigated for Hg(II) removal. Several experimental factors affecting Hg(II) adsorpti…	MWCNTs-Fe3O4 nanocomposite for Hg(II) high adsorption efficiency	Carbon nanotubes; Nanocomposite; Water treatment; Adsorption; Hg(II); removal; Pollutants	none	WEST POMERANIAN UNIV TECHNOL;AL AZHAR UNIV;UNIV JOHANNESBURG;WEST POMERANIAN UNIV TECHNOL;AL AZHAR UNIV;UNIV MALAYSIA PAHANG;CENT METALLUG RES AND DEV INST;UNIV JOHANNESBURG;KING ABDULAZIZ UNIV	WEST POMERANIAN UNIV TECHNOL		SADEGH H, 2018, J MOL LIQ	SADEGH H, 2018, J MOL LIQ	RADARWEG 29, 1043 NX AMSTERDAM, NETHERLANDS	WEST POMERANIAN UNIVERSITY OF TECHNOLOGY; EGYPTIAN KNOWLEDGE BANK (EKB); AL AZHAR UNIVERSITY; UNIVERSITI MALAYSIA PAHANG AL-SULTAN ABDULLAH (UMPSA); EGYPTIAN KNOWLEDGE BANK (EKB); CENTRAL METALLURGICAL RESEARCH \& DEVELOPMENT INSTITUTE (CMRDI); UNIVERSITY OF JOHANNESBURG; KING ABDULAZIZ UNIVERSITY		HAMID-SADEGH@ZUT.EDU.PL GOMAASANAD@AZHAR.EDU.EG VINODFCY@GMAIL.COM		2025-11-07	GF4KV	1873-3166			MINISTRY OF HIGHER EDUCATION MALAYSIA IN THE FORM OF FRGS GRANT [RDU160118]; UNIVERSITI MALAYSIA PAHANG GRANT [RDU170357]	THE AUTHORS WOULD LIKE TO ACKNOWLEDGE THE FUNDING FROM THE MINISTRY OF HIGHER EDUCATION MALAYSIA IN THE FORM OF FRGS GRANT RDU160118 AND UNIVERSITI MALAYSIA PAHANG GRANT RDU170357.	MAY 15
PAZ R;VILTRES H;GUPTA N;ROMERO-GALARZA A;LEYVA C	ORGANIC FRAMEWORKS; MERCURY IONS; ARSENIC REMOVAL; ADSORPTION; CONVERSION; MEMBRANE; WATER; HG2+; ZR		ORGANIC FRAMEWORKS; MERCURY IONS; ARSENIC REMOVAL; ADSORPTION; CONVERSION; MEMBRANE; WATER; HG2+; ZR	LEYVA, C (CORRESPONDING AUTHOR), INST POLITECN NACL, CTR INVEST CIENCIA APLICADA \& TECNOL AVANZADA, MEXICO CITY, MEXICO.; VILTRES, H (CORRESPONDING AUTHOR), MCMASTER UNIV, SCH ENGN PRACTICE \& TECHNOL, HAMILTON, ON, CANADA.; PAZ, ROXANA; LEYVA, CAROLINA, INST POLITECN NACL, CTR INVEST CIENCIA APLICADA \& TECNOL AVANZADA, MEXICO CITY, MEXICO.; VILTRES, HERLYS, MCMASTER UNIV, SCH ENGN PRACTICE \& …	ENVIRON. SCI.-ADV.	MERCURY (HG) IN WATER IS A GLOBAL CONCERN DUE TO ITS HIGH TOXICITY AND BIOACCUMULATION IN THE FOOD CHAIN, WHICH SEVERELY AFFECTS THE ENVIRONMENT AND HUMAN HEALTH. IN THIS WORK, A MAGNETIC ZIRCONIUM METAL-ORGANIC FRAMEWORK (ZR-MOF@FE3O4) HAS BEEN SYNTHESIZED FOR HG(II) REMOVAL. THE ZR-MOF@FE3O4 DEMONSTRATED THE MAXIMUM ADSORPTION CAPACITY OF 303 MG G-1 AT PH 6. THE POSSIBLE MECHANISM WAS CONFIRMED…		LEYVA, C (CORRESPONDING AUTHOR), INST POLITECN NACL, CTR INVEST CIENCIA APLICADA \& TECNOL AVANZADA, MEXICO CITY, MEXICO	10.1039/d2va00010e			ENVIRONMENTAL SCIENCE-ADVANCES	ENGLISH	41	2	182-191			ROYAL SOC CHEMISTRY	ISI	MAGNETIC MOF-808 AS A NOVEL ADSORBENT FOR TOXIC METAL REMOVAL FROM AQUEOUS SOLUTIONS	ARTICLE		1	2022	PAZ ROXANA;VILTRES HERLYS;GUPTA NISHESH KUMAR; ROMERO-GALARZA ADOLFO;LEYVA CAROLINA	ENVIRON SCI-ADV	Mercury (Hg) in water is a global concern due to its high toxicity and bioaccumulation in the food chain, which severely affects the environment and human health. In this work, a magnetic zirconium metal-organic framework (Zr-MOF@Fe3O4) has been synthesized for Hg(ii) removal. The Zr-MOF@Fe3O4 demonstrated the maximum adsorption capacity of 303 mg g-1 at pH 6. The possible mechanism was confirmed…	Magnetic MOF-808 as a novel adsorbent for toxic metal removal from aqueous solutions		none	INST POLITECN NACL;MCMASTER UNIV;INST POLITECN NACL;MCMASTER UNIV;KOREA UNIV SCI AND TECHNOL UST;KOREA INST CIVIL ENGN AND BLDG TECHNOL KICT;UNIV AUTONOMA COAHUILA	INST POLITECN NACL		PAZ R, 2022, ENVIRON SCI-ADV	PAZ R, 2022, ENVIRON SCI-ADV	THOMAS GRAHAM HOUSE, SCIENCE PARK, MILTON RD, CAMBRIDGE CB4 0WF, CAMBS, ENGLAND	INSTITUTO POLITECNICO NACIONAL - MEXICO; MCMASTER UNIVERSITY; UNIVERSITY OF SCIENCE \& TECHNOLOGY (UST); KOREA INSTITUTE OF CIVIL ENGINEERING \& BUILDING TECHNOLOGY (KICT); UNIVERSIDAD AUTONOMA DE COAHUILA		VILTRESH@MCMASTER.CA CAROLINA.LEYVA.INZ@GMAIL.COM		2025-11-07	U9OW7	2754-7000					MAY 30
CHEN Y;MU S	HG(II); FE3O4 NANOPARTICLES; SENSOR; RHODAMINE DERIVATIVE; MERCURY; PRECONCENTRATION; NANOCOMPOSITES; SPECTROMETRY; WATER	HG(II); FE3O4 NANOPARTICLES; SENSOR; RHODAMINE DERIVATIVE	MERCURY; PRECONCENTRATION; NANOCOMPOSITES; SPECTROMETRY; WATER	CHEN, YT (CORRESPONDING AUTHOR), CHINESE ACAD SCI, XINJIANG INST ECOL \& GEOG, URUMQI 830011, PEOPLES R CHINA.; CHEN, YITONG; MU, SHUYONG, CHINESE ACAD SCI, XINJIANG INST ECOL \& GEOG, URUMQI 830011, PEOPLES R CHINA.	SENS. ACTUATOR B-CHEM.	IN THE PRESENT PAPER, CORE-SHELL STRUCTURED FE3O4 NANOPARTICLES FUNCTIONALIZED WITH RHODAMINE DERIVED PROBE WERE PREPARED FOR THE DETECTION, ADSORPTION AND REMOVAL OF HG(II). THE CORE WAS COMPOSED OF SUPERPARAMAGNETIC FE3O4 NANOPARTICLES, WHILE THE SHELL CONSISTED OF SILICA MOLECULAR SIEVE MCM-41 AND WAS FUNCTIONALIZED BY RHODAMINE DERIVED PROBE. THE NANOCOMPOSITE WAS CHARACTERIZED BY ELECTRON MI…		CHEN, YT (CORRESPONDING AUTHOR), CHINESE ACAD SCI, XINJIANG INST ECOL \& GEOG, URUMQI 830011, PEOPLES R CHINA	10.1016/j.snb.2013.10.135			SENSORS AND ACTUATORS B-CHEMICAL	ENGLISH	32		275-282			ELSEVIER SCIENCE SA	ISI	CORE-SHELL STRUCTURED FE3O4 NANOPARTICLES FUNCTIONALIZED WITH RHODAMINE DERIVED PROBE FOR THE DETECTION, ADSORPTION AND REMOVAL OF HG(II): A SENSING SYSTEM WITH `WARNING' SIGNAL	ARTICLE		192	2014	CHEN YITONG;MU SHUYONG	SENS ACTUATOR B-CHEM	In the present paper, core-shell structured Fe3O4 nanoparticles functionalized with rhodamine derived probe were prepared for the detection, adsorption and removal of Hg(II). The core was composed of superparamagnetic Fe3O4 nanoparticles, while the shell consisted of silica molecular sieve MCM-41 and was functionalized by rhodamine derived probe. The nanocomposite was characterized by electron mi…	Core-shell structured Fe3O4 nanoparticles functionalized with rhodamine derived probe for the detection, adsorption and removal of Hg(II): A sensing system with `warning' signal	Hg(II); Fe3O4 nanoparticles; Sensor; Rhodamine derivative	none	XINJIANG INST ECOL AND GEOG;XINJIANG INST ECOL AND GEOG	XINJIANG INST ECOL AND GEOG		CHEN Y, 2014, SENS ACTUATOR B-CHEM	CHEN Y, 2014, SENS ACTUATOR B-CHEM	PO BOX 564, 1001 LAUSANNE, SWITZERLAND	CHINESE ACADEMY OF SCIENCES; XINJIANG INSTITUTE OF ECOLOGY \& GEOGRAPHY, CAS		YITOONGCHEN27@163.COM		2025-11-07	282JP	0925-4005			DOCTORAL FUND OF XINJIANG UNIVERSITY [BS090118]; SCIENCE AND TECHNOLOGY KEY PROJECT OF CHINESE MINISTRY OF EDUCATION [210245]	THIS WORK WAS SUPPORTED BY THE DOCTORAL FUND OF XINJIANG UNIVERSITY (NO. BS090118), SCIENCE AND TECHNOLOGY KEY PROJECT OF CHINESE MINISTRY OF EDUCATION (NO. 210245). THE AUTHORS GRATEFULLY ACKNOWLEDGE THE ASSISTANCE AND ADVICE OF HUI YIN AND XINGHUA ZHAO. WE WOULD LIKE TO THANK MR. XIANGYANG TAN AND RONGPENG WANG FOR THEM HELP IN REVISING THE PAPER IN ENGLISH.	MAR
WANG Z;XU J;HU Y;ZHAO H;ZHOU ;JUNLIANG J;LIU Y;LOU Z;XU X	FE3O4 NANOPARTICLES; SIO2-COATED; THIOL-FUNCTIONALIZED; HG(II); ADSORPTION; WALLED CARBON NANOTUBE; WASTE-WATER; MERCURY REMOVAL; HEAVY-METALS; EFFICIENT REMOVAL; HG-II; IONS; 2; 4-DICHLOROPHENOL; DECHLORINATION; LEAD	FE3O4 NANOPARTICLES; SIO2-COATED; THIOL-FUNCTIONALIZED; HG(II); ADSORPTION	WALLED CARBON NANOTUBE; WASTE-WATER; MERCURY REMOVAL; HEAVY-METALS; EFFICIENT REMOVAL; HG-II; IONS; 2;4-DICHLOROPHENOL; DECHLORINATION; LEAD	XU, J (CORRESPONDING AUTHOR), E CHINA NORMAL UNIV, STATE KEY LAB ESTUARINE \& COASTAL RES, SHANGHAI 206062, PEOPLES R CHINA.; WANG, ZHUOXING; HU, YUNJUN; LIU, YU; LOU, ZIMO; XU, XINHUA, ZHEJIANG UNIV, DEPT ENVIRONM ENGN, HANGZHOU 310058, ZHEJIANG, PEOPLES R CHINA.; XU, JIANG; ZHAO, HENG; ZHOU, JUNLIANG, E CHINA NORMAL UNIV, STATE KEY LAB ESTUARINE \& COASTAL RES, SHANGHAI 206062, PEOPLES R CHINA.	J. TAIWAN INST. CHEM. ENG.	A SELECTIVE ADSORBENT FOR HG(II) WAS PREPARED BY COATING FE3O4 NANOPARTICLES WITH SIO2 WHICH WAS FURTHER FUNCTIONALIZED WITH THIOL (-SH) GROUP. THE NEW ADSORBENT (FE3O4@SIO2-SH) WAS SHOWN TO ADSORB AQUEOUS HG(II) SPECIES IN A WIDE RANGE OF PH (1.0-8.0) CONDITIONS. THE HG(II) ADSORPTION CAPACITY Q(E) WAS MORE THAN 90.0 MG G(-1) AT PH > 3.0, AND WAS SLIGHTLY DECREASED TO 84.6 MG G(-1) UNDER STRONG …		XU, J (CORRESPONDING AUTHOR), E CHINA NORMAL UNIV, STATE KEY LAB ESTUARINE \& COASTAL RES, SHANGHAI 206062, PEOPLES R CHINA	10.1016/j.jtice.2015.10.041		1876-1070	JOURNAL OF THE TAIWAN INSTITUTE OF CHEMICAL ENGINEERS	ENGLISH	105		394-402			ELSEVIER SCIENCE BV	ISI	FUNCTIONAL NANOMATERIALS: STUDY ON AQUEOUS HG(II) ADSORPTION BY MAGNETIC FE3O4@SIO2-SH NANOPARTICLES	ARTICLE		60	2016	WANG ZHUOXING;XU JIANG;HU YUNJUN;ZHAO HENG;ZHOU; JUNLIANG;LIU YU;LOU ZIMO;XU XINHUA	J TAIWAN INST CHEM ENG	A selective adsorbent for Hg(II) was prepared by coating Fe3O4 nanoparticles with SiO2 which was further functionalized with thiol (-SH) group. The new adsorbent (Fe3O4@SiO2-SH) was shown to adsorb aqueous Hg(II) species in a wide range of pH (1.0-8.0) conditions. The Hg(II) adsorption capacity q(e) was more than 90.0 mg g(-1) at pH > 3.0, and was slightly decreased to 84.6 mg g(-1) under strong …	Functional nanomaterials: Study on aqueous Hg(II) adsorption by magnetic Fe3O4@SiO2-SH nanoparticles	Fe3O4 nanoparticles; SiO2-coated; Thiol-functionalized; Hg(II); Adsorption	none	E CHINA NORMAL UNIV;ZHEJIANG UNIV;E CHINA NORMAL UNIV	E CHINA NORMAL UNIV		WANG Z, 2016, J TAIWAN INST CHEM ENG	WANG Z, 2016, J TAIWAN INST CHEM ENG	PO BOX 211, 1000 AE AMSTERDAM, NETHERLANDS	ZHEJIANG UNIVERSITY; EAST CHINA NORMAL UNIVERSITY		JXU@SKLEC.ECNU.EDU.CN		2025-11-07	DG2YY	1876-1089			NATIONAL NATURAL SCIENCE FOUNDATION [21277119, 21477108]; CHINA POSTDOCTORAL SCIENCE FOUNDATION [2015M571523]; SHANGHAI PUJIANG PROGRAM [15PJD014]; STATE KEY LABORATORY OF ESTUARINE AND COASTAL RESEARCH [2014RCDW03]	THE AUTHORS ACKNOWLEDGE THE FINANCIAL SUPPORT OF THE NATIONAL NATURAL SCIENCE FOUNDATION (NO. 21277119, 21477108), CHINA POSTDOCTORAL SCIENCE FOUNDATION (NO. 2015M571523), SHANGHAI PUJIANG PROGRAM (NO. 15PJD014), AND THE STATE KEY LABORATORY OF ESTUARINE AND COASTAL RESEARCH (NO. 2014RCDW03).	MAR
MA Y;LA P;LEI W;LU C;DU ;XUEYAN X	3-AMINOPROPYLTRIETHOXYSILANE; HYBRID MATERIALS; HG(II); ADSORPTION; MECHANISM; PS-EDTA RESIN; ACTIVATED CARBON; GRAPHENE OXIDE; REMOVAL; MERCURY; ADSORBENT; BIOSORPTION; SORPTION; GREEN	3-AMINOPROPYLTRIETHOXYSILANE; HYBRID MATERIALS; HG(II); ADSORPTION; MECHANISM	PS-EDTA RESIN; ACTIVATED CARBON; GRAPHENE OXIDE; REMOVAL; MERCURY; MECHANISM; ADSORBENT; BIOSORPTION; SORPTION; GREEN	MA, YX (CORRESPONDING AUTHOR), LANZHOU UNIV TECHNOL, SCH MAT SCI \& ENGN, STATE KEY LAB ADV PROC \& RECYCLING NONFERROUS MET, LANZHOU 730050, PEOPLES R CHINA.; MA, YINGXIA; LA, PEIQING; LEI, WENJUAN; LU, CUIPING; DU, XUEYAN, LANZHOU UNIV TECHNOL, SCH MAT SCI \& ENGN, STATE KEY LAB ADV PROC \& RECYCLING NONFERROUS MET, LANZHOU 730050, PEOPLES R CHINA.	DESALIN. WATER TREAT.	IN THIS STUDY, THE PROPERTY OF 3-AMINOPROPYLTRIETHOXYSILANE MODIFIED GRAPHITE NANOSHEETS (GNS) DECORATED WITH FE3O4 NANOPARTICLES (FE3O4-GNS-NH2 HYBRIDS) FOR ADSORPTION OF HG(II) IN AQUEOUS SOLUTION WERE EVALUATED BY BATCH METHODS. THE ADSORPTION MECHANISM WAS ALSO STUDIED BY X-RAY PHOTOELECTRON SPECTROSCOPY. THE EFFECT OF FACTORS, SUCH AS PH, CONTACT TIME, INITIAL CONCENTRATION OF HG(II) AND THE…		MA, YX (CORRESPONDING AUTHOR), LANZHOU UNIV TECHNOL, SCH MAT SCI \& ENGN, STATE KEY LAB ADV PROC \& RECYCLING NONFERROUS MET, LANZHOU 730050, PEOPLES R CHINA	10.1080/19443994.2014.998292		1944-3994	DESALINATION AND WATER TREATMENT	ENGLISH	27	11	5004-5012			DESALINATION PUBL	ISI	ADSORPTION OF HG(II) FROM AQUEOUS SOLUTION USING AMINO-FUNCTIONALIZED GRAPHITE NANOSHEETS DECORATED WITH FE3O4 NANOPARTICLES	ARTICLE		57	2016	MA YINGXIA;LA PEIQING;LEI WENJUAN;LU CUIPING;DU; XUEYAN	DESALIN WATER TREAT	In this study, the property of 3-aminopropyltriethoxysilane modified graphite nanosheets (GNS) decorated with Fe3O4 nanoparticles (Fe3O4-GNS-NH2 hybrids) for adsorption of Hg(II) in aqueous solution were evaluated by batch methods. The adsorption mechanism was also studied by X-ray photoelectron spectroscopy. The effect of factors, such as pH, contact time, initial concentration of Hg(II) and the…	Adsorption of Hg(II) from aqueous solution using amino-functionalized graphite nanosheets decorated with Fe3O4 nanoparticles	3-aminopropyltriethoxysilane; Hybrid materials; Hg(II); Adsorption; Mechanism	none	LANZHOU UNIV TECHNOL;LANZHOU UNIV TECHNOL	LANZHOU UNIV TECHNOL		MA Y, 2016, DESALIN WATER TREAT	MA Y, 2016, DESALIN WATER TREAT	36 WALCOTT VALLEY DRIVE,, HOPKINTON, MA 01748 USA	LANZHOU UNIVERSITY OF TECHNOLOGY		MAYX2011818@163.COM PQLA@LUT.CN CATHERINELWJ@163.COM WOSHILCP@163.COM DUXY@LUT.CN		2025-11-07	DA8EF	1944-3986			NATIONAL NATURAL SCIENCE FOUNDATION OF CHINA [51403091]; NATURAL SCIENCE FOUNDATION OF GANSU PROVINCE [2013GS09508]; OPENING FOUNDATION OF STATE KEY LABORATORY OF ADVANCED PROCESSING AND RECYCLING OF NON-FERROUS METALS OF CHINA [SKL1315]	THE WORK WAS FINANCIALLY SUPPORTED BY THE NATIONAL NATURAL SCIENCE FOUNDATION OF CHINA (GRANT NUMBER 51403091), THE NATURAL SCIENCE FOUNDATION OF GANSU PROVINCE (GRANT NUMBER 2013GS09508) AND THE OPENING FOUNDATION OF STATE KEY LABORATORY OF ADVANCED PROCESSING AND RECYCLING OF NON-FERROUS METALS OF CHINA (GRANT NUMBER SKL1315).	MAR 2
QI X;LI N;XU Q;CHEN D;LI H;LU J	IRON-OXIDE NANOPARTICLES; MAGNETIC SEPARATION; INORGANIC MERCURY; CHLORALKALI PLANT; AQUEOUS-SOLUTIONS; ORGANIC MERCURY; HEAVY-METALS; WASTE-WATER; ADSORPTION; NANOCRYSTALS		IRON-OXIDE NANOPARTICLES; MAGNETIC SEPARATION; INORGANIC MERCURY; CHLORALKALI PLANT; AQUEOUS-SOLUTIONS; ORGANIC MERCURY; HEAVY-METALS; WASTE-WATER; ADSORPTION; NANOCRYSTALS	LU, JM (CORRESPONDING AUTHOR), SOOCHOW UNIV, COLL CHEM CHEM ENGN \& MAT SCI, COLLABORAT INNOVAT CTR SUZHOU NANO SCI \& TECHNOL, SUZHOU 215123, PEOPLES R CHINA.; QI, XIUXIU; LI, NAJUN; XU, QINGFENG; CHEN, DONGYUN; LI, HUA; LU, JIANMEI, SOOCHOW UNIV, COLL CHEM CHEM ENGN \& MAT SCI, COLLABORAT INNOVAT CTR SUZHOU NANO SCI \& TECHNOL, SUZHOU 215123, PEOPLES R CHINA.; QI, XIUXIU, CHANGZHOU INST ENGN TE…	RSC ADV.	FUNCTIONAL AMPHIPHILIC OLIGOMERS WERE SYNTHESIZED AND COULD BE EASILY USED TO COAT MONODISPERSED HYDROPHOBIC MAGNETITE FE3O4 SUPERPARAMAGNETIC NANOPARTICLES (MSPNPS) WITH 13 NM DIAMETER. THE RESULTING HYDROPHILIC MODIFIED MSPNPS (M-MSPNPS) WITH ABUNDANT GROUPS ON THE SURFACE, WHICH COULD BOND WITH HG2+, EXHIBIT EXCELLENT ABILITY IN THE FAST, EFFICIENT AND SELECTIVE REMOVAL OF HG2+ FROM WATER SAMP…		LU, JM (CORRESPONDING AUTHOR), SOOCHOW UNIV, COLL CHEM CHEM ENGN \& MAT SCI, COLLABORAT INNOVAT CTR SUZHOU NANO SCI \& TECHNOL, SUZHOU 215123, PEOPLES R CHINA	10.1039/c4ra05935b		2046-2069	RSC ADVANCES	ENGLISH	25	88	47643-47648			ROYAL SOC CHEMISTRY	ISI	WATER-SOLUBLE FE3O4 SUPERPARAMAGNETIC NANOCOMPOSITES FOR THE REMOVAL OF LOW CONCENTRATION MERCURY(II) IONS FROM WATER	ARTICLE		4	2014	QI XIUXIU;LI NAJUN;XU QINGFENG;CHEN DONGYUN;LI HUA;LU JIANMEI	RSC ADV	Functional amphiphilic oligomers were synthesized and could be easily used to coat monodispersed hydrophobic magnetite Fe3O4 superparamagnetic nanoparticles (MSPNPs) with 13 nm diameter. The resulting hydrophilic modified MSPNPs (M-MSPNPs) with abundant groups on the surface, which could bond with Hg2+, exhibit excellent ability in the fast, efficient and selective removal of Hg2+ from water samp…	Water-soluble Fe3O4 superparamagnetic nanocomposites for the removal of low concentration mercury(II) ions from water		none	SOOCHOW UNIV;SOOCHOW UNIV;CHANGZHOU INST ENGN TECHNOL;STATE KEY LAB TREATMENTS AND RECYCLING ORGAN EFFLUE	SOOCHOW UNIV		QI X, 2014, RSC ADV	QI X, 2014, RSC ADV	THOMAS GRAHAM HOUSE, SCIENCE PARK, MILTON RD, CAMBRIDGE CB4 0WF, CAMBS, ENGLAND	SOOCHOW UNIVERSITY - CHINA		LUJM@SUDA.EDU.CN		2025-11-07	AQ7YF				NATIONAL NATURAL SCIENCE FOUNDATION OF CHINA [21336005, 21301125]; NATIONAL SCIENCE AND TECHNOLOGY PILLAR PROGRAM [2012BAC14B03]; NATURAL SCIENCE FOUNDATION OF JIANGSU PROVINCE [BK2012625]; NATURAL SCIENCE FOUNDATION OF THE JIANGSU HIGHER EDUCATION INSTITUTIONS OF CHINA [13KJB430022]; QING-LAN PROJECT OF JIANGSU PROVINCE [2014-23]	WE GRATEFULLY ACKNOWLEDGE THE FINANCIAL SUPPORT PROVIDED BY NATIONAL NATURAL SCIENCE FOUNDATION OF CHINA (21336005, 21301125), THE NATIONAL SCIENCE AND TECHNOLOGY PILLAR PROGRAM (2012BAC14B03), THE NATURAL SCIENCE FOUNDATION OF JIANGSU PROVINCE (BK2012625), THE NATURAL SCIENCE FOUNDATION OF THE JIANGSU HIGHER EDUCATION INSTITUTIONS OF CHINA (13KJB430022) AND THE QING-LAN PROJECT OF JIANGSU PROVIN…
KAZEMI A;BAHRAMIFAR N;HEYDARI A;OLSEN S;IRVING I	ADSORPTION PROCESS; THIOL-FUNCTIONALIZED MGO AND FE3O4; REUSE; ECONOMIC; COSTS; ENVIRONMENTAL IMPACTS; ONE-STEP SYNTHESIS; ADSORPTION CHARACTERISTICS; EFFICIENT REMOVAL; METHYLENE-BLUE; HEAVY-METALS; IONS; MERCURY; NANOPARTICLES; ADSORBENT; AMINO	ADSORPTION PROCESS; THIOL-FUNCTIONALIZED MGO AND FE3O4; REUSE; ECONOMIC; COSTS; ENVIRONMENTAL IMPACTS	ONE-STEP SYNTHESIS; ADSORPTION CHARACTERISTICS; EFFICIENT REMOVAL; METHYLENE-BLUE; HEAVY-METALS; IONS; MERCURY; NANOPARTICLES; ADSORBENT; AMINO	BAHRAMIFAR, N (CORRESPONDING AUTHOR), TARBIAT MODARES UNIV, FAC NAT RESOURCES, DEPT ENVIRONM SCI, POB 46414-356, NOOR, IRAN.; KAZEMI, ALI; BAHRAMIFAR, NADER, TARBIAT MODARES UNIV, FAC NAT RESOURCES, DEPT ENVIRONM SCI, POB 46414-356, NOOR, IRAN.; HEYDARI, AKBAR, TARBIAT MODARES UNIV, CHEM DEPT, POB 14155-4838, TEHRAN, IRAN.; OLSEN, STIG IRVING, TECH UNIV DENMARK DTU, DEPT MANAGEMENT ENGN, DIV QUAN…	J. TAIWAN INST. CHEM. ENG.	ADSORBENTS USED IN ADSORPTION PROCESSES PLAY AN IMPORTANT ROLE IN WASTEWATER TREATMENT TECHNOLOGIES. IT IS THEREFORE OF INTEREST HOW MANUFACTURED ADSORBENTS CAN PERFORM BETTER OR BE MORE EFFICIENT. IS THE ADSORPTION CAPACITY A SUFFICIENT INDICATOR TO SELECT A GOOD ADSORBENT? IN THIS STUDY, TWO NANOADSORBENTS OF HG(II) WERE SUCCESSFULLY SYNTHESIZED. THEY ARE MAGNETIC GRAPHENE OXIDE (MGO-NH-SH) AND…		BAHRAMIFAR, N (CORRESPONDING AUTHOR), TARBIAT MODARES UNIV, FAC NAT RESOURCES, DEPT ENVIRONM SCI, POB 46414-356, NOOR, IRAN	10.1016/j.jtice.2018.10.002		1876-1070	JOURNAL OF THE TAIWAN INSTITUTE OF CHEMICAL ENGINEERS	ENGLISH	45		78-93			ELSEVIER	ISI	SYNTHESIS AND SUSTAINABLE ASSESSMENT OF THIOL-FUNCTIONALIZATION OF MAGNETIC GRAPHENE OXIDE AND SUPERPARAMAGNETIC FE3O4@SIO2 FOR HG(II) REMOVAL FROM AQUEOUS SOLUTION AND PETROCHEMICAL WASTEWATER	ARTICLE		95	2019	KAZEMI ALI;BAHRAMIFAR NADER;HEYDARI AKBAR;OLSEN STIG; IRVING	J TAIWAN INST CHEM ENG	Adsorbents used in adsorption processes play an important role in wastewater treatment technologies. It is therefore of interest how manufactured adsorbents can perform better or be more efficient. Is the adsorption capacity a sufficient indicator to select a good adsorbent? In this study, two nanoadsorbents of Hg(II) were successfully synthesized. They are magnetic graphene oxide (MGO-NH-SH) and…	Synthesis and sustainable assessment of thiol-functionalization of magnetic graphene oxide and superparamagnetic Fe3O4@SiO2 for Hg(II) removal from aqueous solution and petrochemical wastewater	Adsorption process; Thiol-functionalized MGO and Fe3O4; Reuse; Economic; costs; Environmental impacts	none	TARBIAT MODARES UNIV;TARBIAT MODARES UNIV;TARBIAT MODARES UNIV;TECH UNIV DENMARK DTU	TARBIAT MODARES UNIV		KAZEMI A, 2019, J TAIWAN INST CHEM ENG	KAZEMI A, 2019, J TAIWAN INST CHEM ENG	RADARWEG 29, 1043 NX AMSTERDAM, NETHERLANDS	TARBIAT MODARES UNIVERSITY; TARBIAT MODARES UNIVERSITY; TECHNICAL UNIVERSITY OF DENMARK		KAZEMI@ROCKETMAIL.COM N.BAHRAMIFAR@MODARES.AC.IR HEYDARA@MODARES.AC.IR SIOL@DTU.DK		2025-11-07	HL7ST	1876-1089			IRAN NATIONAL SCIENCE FOUNDATION (INSF) [95850075]; IRAN NANOTECHNOLOGY INITIATIVE COUNCIL; TARBIAT MODARES UNIVERSITY, IRAN	THE PRESENT RESEARCH WAS FUNDED BY A GRANT IRAN NATIONAL SCIENCE FOUNDATION (INSF GRANT NO. 95850075), IRAN NANOTECHNOLOGY INITIATIVE COUNCIL AND TARBIAT MODARES UNIVERSITY, IRAN. THE AUTHORS THANK OF MRS. HAGHDOUST (TECHNICAL ASSISTANT OF THE TMU LABORATORY) AND DR. ZAHRA SAHEBI FOR HER ASSISTANCE IN LABORATORY WORK, AND ALL MY GREAT FRIENDS.	FEB
KULAL P;BADALAMOOLE V	PECTIN; POLY(N-HYDROXYETHYLACRYLAMIDE); MAGNETITE; NANOCOMPOSITE; ADSORPTION; ADSORPTION BEHAVIOR; RHODAMINE 6G; REMOVAL; NANOCOMPOSITES; COAGULATION; COPPER	PECTIN; POLY(N-HYDROXYETHYLACRYLAMIDE); MAGNETITE; NANOCOMPOSITE; ADSORPTION	ADSORPTION BEHAVIOR; RHODAMINE 6G; REMOVAL; PECTIN; NANOCOMPOSITES; COAGULATION; COPPER	BADALAMOOLE, V (CORRESPONDING AUTHOR), MANGALORE UNIV, DEPT POSTGRAD STUDIES \& RES CHEM, DK 574199, KARNATAKA, INDIA.; KULAL, PRAJWAL; BADALAMOOLE, VISHALAKSHI, MANGALORE UNIV, DEPT POSTGRAD STUDIES \& RES CHEM, DK 574199, KARNATAKA, INDIA.	INT. J. BIOL. MACROMOL.	A PECTIN (PEC) BASED GEL HAS BEEN MADE BY GRAFTING N-HYDROXYETHYLACRYLAMIDE (HEAA) ON PECTIN USING POTASSIUM PEROXODISULPHATE AS INITIATOR AND N,N-METHYLENEBISAAYLAMIDE AS CROSSLINKER UNDER MICROWAVE IRRADIATION. THE MAGNETITE (FE3O4) NANOPARTICLES WERE INCORPORATED WITHIN THIS GEL VIA IN SITU DIFFUSION OF FE(2+ )AND FE3+ FOLLOWED BY REACTION WITH AMMONIA SOLUTION. THE SYNTHESIZED GEL, PECTIN-GRA…		BADALAMOOLE, V (CORRESPONDING AUTHOR), MANGALORE UNIV, DEPT POSTGRAD STUDIES \& RES CHEM, DK 574199, KARNATAKA, INDIA	10.1016/j.ijbiomac.2019.11.181		0141-8130	INTERNATIONAL JOURNAL OF BIOLOGICAL MACROMOLECULES	ENGLISH	57		1408-1417			ELSEVIER	ISI	MAGNETITE NANOPARTICLE EMBEDDED PECTIN-GRAFT-POLY(N-HYDROXYETHYLACRYLAMIDE) HYDROGEL: EVALUATION AS ADSORBENT FOR DYES AND HEAVY METAL IONS FROM WASTE WATER	ARTICLE		156	2020	KULAL PRAJWAL;BADALAMOOLE VISHALAKSHI	INT J BIOL MACROMOL	A pectin (Pec) based gel has been made by grafting N-hydroxyethylacrylamide (HEAA) on pectin using potassium peroxodisulphate as initiator and N,N-methylenebisaaylamide as crosslinker under microwave irradiation. The magnetite (Fe3O4) nanoparticles were incorporated within this gel via in situ diffusion of Fe(2+ )and Fe3+ followed by reaction with ammonia solution. The synthesized gel, pectin-gra…	Magnetite nanoparticle embedded Pectin-graft-poly(N-hydroxyethylacrylamide) hydrogel: Evaluation as adsorbent for dyes and heavy metal ions from waste water	Pectin; Poly(N-hydroxyethylacrylamide); Magnetite; Nanocomposite; Adsorption	none	MANGALORE UNIV;MANGALORE UNIV	MANGALORE UNIV		KULAL P, 2020, INT J BIOL MACROMOL	KULAL P, 2020, INT J BIOL MACROMOL	RADARWEG 29, 1043 NX AMSTERDAM, NETHERLANDS	MANGALORE UNIVERSITY		VISHALAKSHI2009@YAHOO.COM		2025-11-07	LU9ZI	1879-0003					AUG 1
ZHOU Y;LUAN L;TANG B;NIU Y;QU ;RONGJUN R;LIU Y;XU W	FE3O4; PAMAM DENDRIMERS; SCHIFF BASE; HG(II); ADSORPTION MECHANISM; GRAPHENE OXIDE; EFFICIENT ADSORPTION; HIGH-CAPACITY; FUEL ETHANOL; NANOCOMPOSITE; DENDRIMERS; MERCURY; IONS; HG2+; NANOPARTICLES	FE3O4; PAMAM DENDRIMERS; SCHIFF BASE; HG(II); ADSORPTION MECHANISM	GRAPHENE OXIDE; EFFICIENT ADSORPTION; HIGH-CAPACITY; FUEL ETHANOL; NANOCOMPOSITE; DENDRIMERS; MERCURY; IONS; HG2+; NANOPARTICLES	NIU, YZ (CORRESPONDING AUTHOR), LUDONG UNIV, SCH CHEM \& MAT SCI, YANTAI 264025, PEOPLES R CHINA.; ZHOU, YUNZHE; LUAN, LIPING; TANG, BENTIAN; NIU, YUZHONG; QU, RONGJUN; LIU, YI; XU, WENLONG, LUDONG UNIV, SCH CHEM \& MAT SCI, YANTAI 264025, PEOPLES R CHINA.	CHEM. ENG. J.	HG(II) POLLUTION TO AQUEOUS SYSTEM POSES HAZARDOUS EFFECT TO HUMAN HEALTH. THE DESIGN OF NEW ADSORBENT WITH ENHANCED ADSORPTION SELECTIVITY AND CAPACITY IS A GREAT CHALLENGE FOR THE DECONTAMINATION OF AQUEOUS HG(II). HEREIN, SCHIFF BASE DECORATED PAMAM DENDRIMER/MAGNETIC FE3O4 COMPOSITES (FE3O4@SIO2-G0-S, FE3O4@SIO(2)G1.0-S, AND FE3O4@SIO2-G2.0-S) WERE FABRICATED USING AN IMPROVED METHOD BY COMBI…		NIU, YZ (CORRESPONDING AUTHOR), LUDONG UNIV, SCH CHEM \& MAT SCI, YANTAI 264025, PEOPLES R CHINA	10.1016/j.cej.2020.125651		1385-8947	CHEMICAL ENGINEERING JOURNAL	ENGLISH	135					ELSEVIER SCIENCE SA	ISI	FABRICATION OF SCHIFF BASE DECORATED PAMAM DENDRIMER/MAGNETIC FE3O4 FOR SELECTIVE REMOVAL OF AQUEOUS HG(II)	ARTICLE		398	2020	ZHOU YUNZHE;LUAN LIPING;TANG BENTIAN;NIU YUZHONG;QU; RONGJUN;LIU YI;XU WENLONG	CHEM ENG J	Hg(II) pollution to aqueous system poses hazardous effect to human health. The design of new adsorbent with enhanced adsorption selectivity and capacity is a great challenge for the decontamination of aqueous Hg(II). Herein, Schiff base decorated PAMAM dendrimer/magnetic Fe3O4 composites (Fe3O4@SiO2-G0-S, Fe3O4@SiO(2)G1.0-S, and Fe3O4@SiO2-G2.0-S) were fabricated using an improved method by combi…	Fabrication of Schiff base decorated PAMAM dendrimer/magnetic Fe3O4 for selective removal of aqueous Hg(II)	Fe3O4; PAMAM dendrimers; Schiff base; Hg(II); Adsorption mechanism	none	LUDONG UNIV;LUDONG UNIV	LUDONG UNIV		ZHOU Y, 2020, CHEM ENG J	ZHOU Y, 2020, CHEM ENG J	PO BOX 564, 1001 LAUSANNE, SWITZERLAND	LUDONG UNIVERSITY	125651	NIUYUZHONG@LDU.EDU.CN		2025-11-07	ND0JA	1873-3212			NATURAL SCIENCE FOUNDATION OF SHANDONG PROVINCE [ZR2018MB039]; NATIONAL NATURAL SCIENCE FOUNDATION OF CHINA [21307053]	YUNZHE ZHOU, LIPING LUAN AND BENTIAN TANG CONTRIBUTED EQUALLY. THE WORK IS FINANCIALLY SUPPORT BY NATURAL SCIENCE FOUNDATION OF SHANDONG PROVINCE (ZR2018MB039), NATIONAL NATURAL SCIENCE FOUNDATION OF CHINA (21307053).	OCT 15
HUANG Y;PEDDI P;ZENG H;TANG C;TENG X	FGD WASTEWATER; HEAVY METAL REMOVAL; HYBRID ZERO-VALENT IRON (HZVI); MERCURY REMOVAL; SELENIUM REMOVAL; CORROSION COATINGS; NITRATE REDUCTION; AQUEOUS-SOLUTION; SELENATE; REMOVAL; SELENIUM	FGD WASTEWATER; HEAVY METAL REMOVAL; HYBRID ZERO-VALENT IRON (HZVI); MERCURY REMOVAL; SELENIUM REMOVAL	CORROSION COATINGS; NITRATE REDUCTION; AQUEOUS-SOLUTION; SELENATE; REMOVAL; SELENIUM	HUANG, YH (CORRESPONDING AUTHOR), TEXAS A\&M UNIV, DEPT BIOL \& AGR ENGN, TAMU 2117, COLLEGE STN, TX 77843 USA.; HUANG, YONG H.; PEDDI, PHANI K.; ZENG, HUI; TANG, CI-LAI, TEXAS A\&M UNIV, DEPT BIOL \& AGR ENGN, COLLEGE STN, TX 77843 USA.; TENG, XINJUN, SOUTHERN CO, BIRMINGHAM, AL 35291 USA.	WATER SCI. TECHNOL.	THE HYBRID ZERO-VALENT-IRON (HZVI) PROCESS IS A NOVEL CHEMICAL TREATMENT PROCESS THAT HAS SHOWN GREAT POTENTIAL IN PREVIOUS LABORATORY AND FIELD BENCH-TOP SCALE TESTS FOR REMOVING SELENIUM, MERCURY AND NUTRIENTS FROM VARIOUS INDUSTRIAL WASTEWATERS. IN THIS STUDY, A PILOT-SCALE DEMONSTRATION WAS CONDUCTED TO CONTINUOUSLY TREAT 3.8-7.6 L/MIN (1-2 GPM) OF THE FLUE-GAS-DESULFURIZATION (FGD) WASTEWATE…		HUANG, YH (CORRESPONDING AUTHOR), TEXAS A\&M UNIV, DEPT BIOL \& AGR ENGN, TAMU 2117, COLLEGE STN, TX 77843 USA	10.2166/wst.2012.446		0273-1223	WATER SCIENCE AND TECHNOLOGY	ENGLISH	32	1	16-23			IWA PUBLISHING	ISI	PILOT-SCALE DEMONSTRATION OF THE HYBRID ZERO-VALENT IRON PROCESS FOR TREATING FLUE-GAS-DESULFURIZATION WASTEWATER: PART I	ARTICLE		67	2013	HUANG YONG H;PEDDI PHANI K;ZENG HUI;TANG CI-LAI; TENG XINJUN	WATER SCI TECHNOL	The hybrid zero-valent-iron (hZVI) process is a novel chemical treatment process that has shown great potential in previous laboratory and field bench-top scale tests for removing selenium, mercury and nutrients from various industrial wastewaters. In this study, a pilot-scale demonstration was conducted to continuously treat 3.8-7.6 L/min (1-2 gpm) of the flue-gas-desulfurization (FGD) wastewate…	Pilot-scale demonstration of the hybrid zero-valent iron process for treating flue-gas-desulfurization wastewater: Part I	FGD wastewater; heavy metal removal; hybrid zero-valent iron (hZVI); mercury removal; selenium removal	none	TEXAS AANDM UNIV;TEXAS AANDM UNIV	TEXAS AANDM UNIV		HUANG Y, 2013, WATER SCI TECHNOL	HUANG Y, 2013, WATER SCI TECHNOL	ALLIANCE HOUSE, 12 CAXTON ST, LONDON SW1H0QS, ENGLAND	TEXAS A\&M UNIVERSITY SYSTEM; TEXAS A\&M UNIVERSITY COLLEGE STATION		YHUANG@TAMU.EDU		2025-11-07	071II	1996-9732			SOUTHERN COMPANY; TEXAS AGRILIFE RESEARCH	THIS RESEARCH WAS FUNDED JOINTLY BY SOUTHERN COMPANY AND TEXAS AGRILIFE RESEARCH. WE THANK GEORGIA POWER FOR HOSTING THE FIELD DEMONSTRATION AND PROVIDING ESSENTIAL ASSISTANCE IN LOGISTICS. WE THANK DR YOUJUN DENG OF SOIL AND CROP SCIENCE AT TEXAS A\&M UNIVERSITY FOR HIS ASSISTANCE IN XRD ANALYSIS. WE ALSO THANK MATERIAL CHARACTERIZATION FACILITY AT TEXAS A\&M UNIVERSITY FOR ASSISTANCE IN SEM ANA…
CAO X;XIAO F;XIE X;LI X;LI ;GUANG G;LI L;ZHANG Q;ZHANG W;YOU X;GAI Y;LYU X	ADSORPTION; DESORPTION; FE3O4@PPY; MERCURY; HEAVY-METAL IONS; CARBON NANOTUBES; REMOVAL; CR(VI); NANOPARTICLES; SEPARATION; ADSORBENT	ADSORPTION; DESORPTION; FE3O4@PPY; MERCURY	HEAVY-METAL IONS; CARBON NANOTUBES; REMOVAL; CR(VI); NANOPARTICLES; SEPARATION; ADSORBENT	ZHANG, W (CORRESPONDING AUTHOR), DONGYING ENTRY EXIT INSPECT \& QUARANTINE BUR, DONGYING 257091, PEOPLES R CHINA.; CAO, XIAO-QIANG; XIAO, FEI; XIE, XIAO-YU; LI, XUAN; LI, GUANG, SHANDONG UNIV SCI \& TECHNOL, COLL SAFETY \& ENVIRONM ENGN, QINGDAO 266590, PEOPLES R CHINA.; LI, LIN; YOU, XIAO-FANG; LYU, XIAN-JUN, SHANDONG UNIV SCI \& TECHNOL, COLL CHEM \& BIOL ENGN, QINGDAO 266590, PEOPLES R CHINA.;…	WATER REUSE	FUNCTIONAL MAGNETIC FE3O4@PPY MICROSPHERES WERE PREPARED AND CHARACTERIZED BY XRD, FTIR, SEM, TEM, AND MAGNETOMETER, AND THE ADSORPTION OF HG(II) ONTO FE3O4@PPY WAS INVESTIGATED. THE RESULTS SHOWED THAT THE ADSORPTION OF HG(II) ONTO FE3O4@PPY DRAMATICALLY INCREASES WITHIN 5 MIN AND REACHES ADSORPTION EQUILIBRIUM AT 200 MIN. THE ADSORPTION OF HG(II) INCREASES WITH PH INCREASED, AND A REMOVAL EFFIC…		ZHANG, W (CORRESPONDING AUTHOR), DONGYING ENTRY EXIT INSPECT \& QUARANTINE BUR, DONGYING 257091, PEOPLES R CHINA	10.2166/wrd.2021.080		2709-6092	WATER REUSE	ENGLISH	7	3	347-360			IWA PUBLISHING	ISI	ADSORPTION AND DESORPTION OF HG(II) FROM AQUEOUS SOLUTION USING MAGNETIC FE3O4@PPY COMPOSITE MICROSPHERES	ARTICLE		11	2021	CAO XIAO-QIANG;XIAO FEI;XIE XIAO-YU;LI XUAN;LI; GUANG;LI LIN;ZHANG QING-JIAN;ZHANG WEI;YOU XIAO-FANG;GAI YU-JIE;LYU XIAN-JUN	WATER REUSE	Functional magnetic Fe3O4@PPy microspheres were prepared and characterized by XRD, FTIR, SEM, TEM, and magnetometer, and the adsorption of Hg(II) onto Fe3O4@PPy was investigated. The results showed that the adsorption of Hg(II) onto Fe3O4@PPy dramatically increases within 5 min and reaches adsorption equilibrium at 200 min. The adsorption of Hg(II) increases with pH increased, and a removal effic…	Adsorption and desorption of Hg(II) from aqueous solution using magnetic Fe3O4@PPy composite microspheres	adsorption; desorption; Fe3O4@PPy; mercury	none	W (CORRESPONDING AUTHOR);SHANDONG UNIV SCI AND TECHNOL;SHANDONG UNIV SCI AND TECHNOL;QINGDAO KEDA MIN TECHNOL DEV CO LTD	W (CORRESPONDING AUTHOR)		CAO X, 2021, WATER REUSE	CAO X, 2021, WATER REUSE	REPUBLIC-EXPORT BLDG, UNITS 1 04 \& 1 05, 1 CLOVE CRESCENT, LONDON, ENGLAND	SHANDONG UNIVERSITY OF SCIENCE \& TECHNOLOGY; SHANDONG UNIVERSITY OF SCIENCE \& TECHNOLOGY		WEIZHANG19961123@163.COM		2025-11-07	WK6BY	2709-6106					SEP
INDURKAR P;RAJ S;KULSHRESTHA V	ADSORPTION; MXENE; NANOCOMPOSITE; RESPONSE SURFACE METHODOLOGY; MAGNETIC; RAY PHOTOELECTRON-SPECTROSCOPY; AQUEOUS-SOLUTION; HEAVY-METALS; MERCURY; REMOVAL; WATER; IONS; CARBON; RSM; PERFORMANCE	ADSORPTION; MXENE; NANOCOMPOSITE; RESPONSE SURFACE METHODOLOGY; MAGNETIC	RAY PHOTOELECTRON-SPECTROSCOPY; AQUEOUS-SOLUTION; HEAVY-METALS; MERCURY; REMOVAL; ADSORPTION; WATER; IONS; CARBON; RSM; PERFORMANCE	INDURKAR, PD (CORRESPONDING AUTHOR), CSIR CENT SALT \& MARINE CHEM RES INST, MEMBRANE SCI \& SEPARAT TECHNOL DIV, GB MARG, BHAVNAGAR 364002, INDIA.; INDURKAR, PD (CORRESPONDING AUTHOR), ACAD SCI \& INNOVAT RES ACSIR, GHAZIABAD 201002, INDIA.; INDURKAR, PANKAJ D.; RAJ, SAVAN K.; KULSHRESTHA, VAIBHAV, CSIR CENT SALT \& MARINE CHEM RES INST, MEMBRANE SCI \& SEPARAT TECHNOL DIV, GB MARG, BHAVNAGAR 36…	ENVIRON. SCI. POLLUT. RES.	TWO-DIMENSIONAL MXENE WITH LAYERED STRUCTURE HAS RECENTLY EMERGED AS A NANOMATERIAL WITH FASCINATING CHARACTERISTICS AND APPLICABILITY. HEREIN, WE PREPARED THE NEWLY MODIFIED MAGNETIC MXENE (MX/FE3O4) NANOCOMPOSITE USING SOLVOTHERMAL APPROACH AND INVESTIGATED ITS ADSORPTION BEHAVIOR TO STUDY THE REMOVAL EFFICIENCY OF HG(II) IONS FROM AQUEOUS SOLUTION. THE EFFECT OF ADSORPTION PARAMETERS SUCH AS A…		INDURKAR, PD (CORRESPONDING AUTHOR), CSIR CENT SALT \& MARINE CHEM RES INST, MEMBRANE SCI \& SEPARAT TECHNOL DIV, GB MARG, BHAVNAGAR 364002, INDIA	10.1007/s11356-023-27687-7		0944-1344	ENVIRONMENTAL SCIENCE AND POLLUTION RESEARCH	ENGLISH	11	30	76085-76103			SPRINGER HEIDELBERG	ISI	MULTIVARIATE MODELING AND PROCESS OPTIMIZATION OF HG(II) REMEDIATION USING SOLVOTHERMAL SYNTHESIZED 2D MX/FE3O4 BY RESPONSE SURFACE METHODOLOGY: CHARACTERISTICS AND MECHANISM STUDY	ARTICLE		30	2023	INDURKAR PANKAJ D;RAJ SAVAN K;KULSHRESTHA VAIBHAV	ENVIRON SCI POLLUT RES	Two-dimensional MXene with layered structure has recently emerged as a nanomaterial with fascinating characteristics and applicability. Herein, we prepared the newly modified magnetic MXene (MX/Fe3O4) nanocomposite using solvothermal approach and investigated its adsorption behavior to study the removal efficiency of Hg(II) ions from aqueous solution. The effect of adsorption parameters such as a…	Multivariate modeling and process optimization of Hg(II) remediation using solvothermal synthesized 2D MX/Fe3O4 by response surface methodology: characteristics and mechanism study	Adsorption; MXene; Nanocomposite; Response surface methodology; Magnetic	none	CSIR CENT SALT AND MARINE CHEM RES INST;ACAD SCI AND INNOVAT RES ACSIR;CSIR CENT SALT AND MARINE CHEM RES INST;ACAD SCI AND INNOVAT RES ACSIR;MK BHAVNAGAR UNIV	CSIR CENT SALT AND MARINE CHEM RES INST		INDURKAR P, 2023, ENVIRON SCI POLLUT RES	INDURKAR P, 2023, ENVIRON SCI POLLUT RES	TIERGARTENSTRASSE 17, D-69121 HEIDELBERG, GERMANY	COUNCIL OF SCIENTIFIC \& INDUSTRIAL RESEARCH (CSIR) - INDIA; CSIR - CENTRAL SALT \& MARINE CHEMICAL RESEARCH INSTITUTE (CSMCRI); ACADEMY OF SCIENTIFIC \& INNOVATIVE RESEARCH (ACSIR); MAHARAJA KRISHNAKUMAR SINHJI BHAVNAGAR UNIVERSITY		PANKAJDI@CSMCRI.RES.IN		2025-11-07	J9BC2	1614-7499	MAY 2023		CSIR-CSMCRI PRIS [115/2022]; COUNCIL OF SCIENTIFIC AND INDUSTRIAL RESEARCH [MLP0043]	THIS MANUSCRIPT HAS CSIR-CSMCRI PRIS NUMBER 115/2022. THE AUTHORS ACKNOWLEDGE SIGNIFICANT FUNDING FROM THE COUNCIL OF SCIENTIFIC AND INDUSTRIAL RESEARCH MLP0043. THE AUTHORS ARE THANKFUL TO AED\&CIF, CSMCRI FOR PROVIDING INSTRUMENTAL SUPPORT.	JUN
ELWAKEEL K;GUIBAL E	HG(II) SORPTION; MAGNETIC HYBRID SORBENT; DIETHYLENETRIAMINE-GRAFTED; CHITOSAN; UPTAKE KINETICS; SORPTION ISOTHERMS; THERMODYNAMICS; ADSORPTION; MERCURY; NANOPARTICLES; METAL; RESIN; TETRAETHYLENEPENTAMINE; SEPARATION; ADSORBENT; GOETHITE	HG(II) SORPTION; MAGNETIC HYBRID SORBENT; DIETHYLENETRIAMINE-GRAFTED; CHITOSAN; UPTAKE KINETICS; SORPTION ISOTHERMS; THERMODYNAMICS	ADSORPTION; CHITOSAN; MERCURY; NANOPARTICLES; METAL; RESIN; TETRAETHYLENEPENTAMINE; SEPARATION; ADSORBENT; GOETHITE	GUIBAL, E (CORRESPONDING AUTHOR), CTR MAT MINES ALES C2MA, ECOLE MINES ALES, 6 AVE CLAVIERES, F-30319 ALES, FRANCE.; ELWAKEEL, KHALID Z., PORT SAID UNIV, DEPT ENVIRONM SCI, FAC SCI, PORT SAID, EGYPT.; GUIBAL, ERIC, CTR MAT MINES ALES C2MA, ECOLE MINES ALES, F-30319 ALES, FRANCE.	CHEM. ENG. J.	A NEW HYBRID MATERIAL WAS PREPARED USING CHITOSAN, GLYCIDYL METHACRYLATE AND MAGNETITE MICROPARTICLES. THE CONCENTRATION OF AMINE GROUPS ON THE SORBENT WAS INCREASED BY GRAFTING DIETHYLENETRIAMINE. THESE MATERIALS WERE TESTED FOR THE SORPTION OF HG(II) METAL IONS. THESE MATERIALS SHOWED HIGH AFFINITY AND SELECTIVITY FOR HG(II) UPTAKE FROM AQUEOUS SOLUTIONS: MAXIMUM SORPTION CAPACITY REACHED 2.6 M…		GUIBAL, E (CORRESPONDING AUTHOR), CTR MAT MINES ALES C2MA, ECOLE MINES ALES, 6 AVE CLAVIERES, F-30319 ALES, FRANCE	10.1016/j.cej.2015.05.110		1385-8947	CHEMICAL ENGINEERING JOURNAL	ENGLISH	78		345-359			ELSEVIER SCIENCE SA	ISI	SELECTIVE REMOVAL OF HG(II) FROM AQUEOUS SOLUTION BY FUNCTIONALIZED MAGNETIC-MACROMOLECULAR HYBRID MATERIAL	ARTICLE		281	2015	ELWAKEEL KHALID Z;GUIBAL ERIC	CHEM ENG J	A new hybrid material was prepared using chitosan, glycidyl methacrylate and magnetite microparticles. The concentration of amine groups on the sorbent was increased by grafting diethylenetriamine. These materials were tested for the sorption of Hg(II) metal ions. These materials showed high affinity and selectivity for Hg(II) uptake from aqueous solutions: maximum sorption capacity reached 2.6 m…	Selective removal of Hg(II) from aqueous solution by functionalized magnetic-macromolecular hybrid material	Hg(II) sorption; Magnetic hybrid sorbent; Diethylenetriamine-grafted; chitosan; Uptake kinetics; Sorption isotherms; Thermodynamics	none	FRANCE.;PORT SAID UNIV;FRANCE.	ECOLE MINES ALES		ELWAKEEL K, 2015, CHEM ENG J	ELWAKEEL K, 2015, CHEM ENG J	PO BOX 564, 1001 LAUSANNE, SWITZERLAND	EGYPTIAN KNOWLEDGE BANK (EKB); PORT SAID UNIVERSITY; IMT - INSTITUT MINES-TELECOM; IMT MINES ALES		ERIC.GUIBAL@MINES-ALES.FR		2025-11-07	CS8AN	1873-3212			FRENCH GOVERNMENT THROUGH FRENCH EMBASSY IN EGYPT (INSTITUT FRANCAIS D'EGYPTE)	THIS STUDY WAS SUPPORTED BY THE FRENCH GOVERNMENT THROUGH A FELLOWSHIP GRANTED FROM THE FRENCH EMBASSY IN EGYPT (INSTITUT FRANCAIS D'EGYPTE). THE AUTHORS WOULD LIKE TO THANK THIERRY VINCENT, ANDRE BRUN AND JEAN-MARIE TAULEMESSE FOR THEIR TECHNICAL AND SCIENTIFIC CONTRIBUTIONS TO THIS WORK.	DEC 1
PAN S;ZHANG Y;SHEN H;HU M	MERCAPTO-FUNCTIONALIZED MAGNETIC FE3O4; NANO-ADSORBENTS (SH-FE3O4-NMPS); HG(II); MAGNETIC EFFECT; ADSORPTION; REDUCTION; MECHANISM; SORPTION; MERCURY; NANOCOMPOSITES; NANOPARTICLES; XPS; CADMIUM; SURFACE; CR(VI); OXIDES; CARBON	MERCAPTO-FUNCTIONALIZED MAGNETIC FE3O4; NANO-ADSORBENTS (SH-FE3O4-NMPS); HG(II); MAGNETIC EFFECT; ADSORPTION; REDUCTION; MECHANISM	SORPTION; MERCURY; NANOCOMPOSITES; NANOPARTICLES; XPS; CADMIUM; SURFACE; CR(VI); OXIDES; CARBON	SHEN, HY (CORRESPONDING AUTHOR), ZHEJIANG UNIV, NINGBO INST TECHNOL, NINGBO 315100, ZHEJIANG, PEOPLES R CHINA.; PAN, SHENGDONG; ZHANG, YUN; SHEN, HAOYU; HU, MEIQIN, ZHEJIANG UNIV, NINGBO INST TECHNOL, NINGBO 315100, ZHEJIANG, PEOPLES R CHINA.; PAN, SHENGDONG, NINGBO MUNICIPAL CTR DIS CONTROL \& PREVENT, NINGBO 315010, ZHEJIANG, PEOPLES R CHINA.; ZHANG, YUN, ZHEJIANG UNIV, COLL SCI, HANGZHOU 31002…	CHEM. ENG. J.	A SERIES OF MERCAPTO-FUNCTIONALIZED CORE-SHELL STRUCTURED NANO-MAGNETIC FE3O4 POLYMERS (SH-FE3O4-NMPS) WITH DIFFERENT AMOUNT OF MAGNETIC CORE WERE SYNTHESIZED AND CHARACTERIZED BY XRD, EA, VSM, TG-DTG AND XPS. THEIR APPLICATIONS AS ADSORBENTS FOR HG(II) REMOVAL FROM AQUEOUS SOLUTIONS WERE INTENSIVELY INVESTIGATED. THE ADSORPTION PROCESS OF HG(II) BY SH-FE3O4-NMPS WAS FOUND HIGHLY PH DEPENDENT AND…		SHEN, HY (CORRESPONDING AUTHOR), ZHEJIANG UNIV, NINGBO INST TECHNOL, NINGBO 315100, ZHEJIANG, PEOPLES R CHINA	10.1016/j.cej.2012.09.016		1385-8947	CHEMICAL ENGINEERING JOURNAL	ENGLISH	154		564-574			ELSEVIER SCIENCE SA	ISI	AN INTENSIVE STUDY ON THE MAGNETIC EFFECT OF MERCAPTO-FUNCTIONALIZED NANO-MAGNETIC FE3O4 POLYMERS AND THEIR ADSORPTION MECHANISM FOR THE REMOVAL OF HG(II) FROM AQUEOUS SOLUTION	ARTICLE		210	2012	PAN SHENGDONG;ZHANG YUN;SHEN HAOYU;HU MEIQIN	CHEM ENG J	A series of mercapto-functionalized core-shell structured nano-magnetic Fe3O4 polymers (SH-Fe3O4-NMPs) with different amount of magnetic core were synthesized and characterized by XRD, EA, VSM, TG-DTG and XPS. Their applications as adsorbents for Hg(II) removal from aqueous solutions were intensively investigated. The adsorption process of Hg(II) by SH-Fe3O4-NMPs was found highly pH dependent and…	An intensive study on the magnetic effect of mercapto-functionalized nano-magnetic Fe3O4 polymers and their adsorption mechanism for the removal of Hg(II) from aqueous solution	Mercapto-functionalized magnetic Fe3O4; nano-adsorbents (SH-Fe3O4-NMPs); Hg(II); Magnetic effect; Adsorption; Reduction; Mechanism	none	ZHEJIANG UNIV;ZHEJIANG UNIV;NINGBO MUNICIPAL CTR DIS CONTROL AND PREVENT;ZHEJIANG UNIV	ZHEJIANG UNIV		PAN S, 2012, CHEM ENG J	PAN S, 2012, CHEM ENG J	PO BOX 564, 1001 LAUSANNE, SWITZERLAND	ZHEJIANG UNIVERSITY; ZHEJIANG UNIVERSITY		HYSHEN@NIT.ZJU.EDU.CN		2025-11-07	058EO	1873-3212			ZHEJIANG SCIENCE AND TECHNOLOGY BUREAU [2009R50004]	WE WOULD LIKE TO THANK THE ZHEJIANG SCIENCE AND TECHNOLOGY BUREAU (2009R50004) FOR THE FINANCIAL SUPPORT.	NOV 1
MADRAKIAN T;AFKHAMI A;ZADPOUR B;AHMADI ;MAZAHER M	MAGNETIC NANOPARTICLES; REMOVAL; HEAVY METAL IONS; POLYMER; SOLID-PHASE EXTRACTION; COATED MAGNETITE NANOPARTICLES; WALLED CARBON; NANOTUBES; WATER SAMPLES; ADSORPTIVE REMOVAL; MESOPOROUS SILICA; NANO-ADSORBENT; URINE SAMPLES; TRACE AMOUNTS; WASTE-WATER	MAGNETIC NANOPARTICLES; REMOVAL; HEAVY METAL IONS; POLYMER	SOLID-PHASE EXTRACTION; COATED MAGNETITE NANOPARTICLES; WALLED CARBON; NANOTUBES; WATER SAMPLES; ADSORPTIVE REMOVAL; MESOPOROUS SILICA; NANO-ADSORBENT; URINE SAMPLES; TRACE AMOUNTS; WASTE-WATER	MADRAKIAN, T (CORRESPONDING AUTHOR), BU ALI SINA UNIV, FAC CHEM, FAJ AV, HAMADAN 6517838695, IRAN.; MADRAKIAN, TAYYEBEH; AFKHAMI, ABBAS; ZADPOUR, BORHAN; AHMADI, MAZAHER, BU ALI SINA UNIV, FAC CHEM, HAMADAN 6517838695, IRAN.	J. IND. ENG. CHEM.	A MAGHEMITE NANOPARTICLES MODIFIED WITH HOMOPOLYMERS OF A NEW MERCAPTOETHYLAMINO MONOMER (MAMNPS) HAVE BEEN PREPARED. THE MAMNPS NANOPARTICLES WERE FULLY CHARACTERIZED BY FT-IR, XRD, BET AND TEM MEASUREMENTS. THE INFLUENCES OF PARAMETERS INCLUDING PH, DOSAGE OF ADSORBENT AND CONTACT TIME HAVE BEEN INVESTIGATED IN ORDER TO FIND THE OPTIMUM ADSORPTION CONDITIONS. METAL IONS ADSORPTION PROCESS WAS T…		MADRAKIAN, T (CORRESPONDING AUTHOR), BU ALI SINA UNIV, FAC CHEM, FAJ AV, HAMADAN 6517838695, IRAN	10.1016/j.jiec.2014.05.029		1226-086X	JOURNAL OF INDUSTRIAL AND ENGINEERING CHEMISTRY	ENGLISH	55		1160-1166			ELSEVIER SCIENCE INC	ISI	NEW SYNTHETIC MERCAPTOETHYLAMINO HOMOPOLYMER-MODIFIED MAGHEMITE NANOPARTICLES FOR EFFECTIVE REMOVAL OF SOME HEAVY METAL IONS FROM AQUEOUS SOLUTION	ARTICLE		21	2015	MADRAKIAN TAYYEBEH;AFKHAMI ABBAS;ZADPOUR BORHAN;AHMADI; MAZAHER	J IND ENG CHEM	A maghemite nanoparticles modified with homopolymers of a new mercaptoethylamino monomer (MAMNPs) have been prepared. The MAMNPs nanoparticles were fully characterized by FT-IR, XRD, BET and TEM measurements. The influences of parameters including pH, dosage of adsorbent and contact time have been investigated in order to find the optimum adsorption conditions. Metal ions adsorption process was t…	New synthetic mercaptoethylamino homopolymer-modified maghemite nanoparticles for effective removal of some heavy metal ions from aqueous solution	Magnetic nanoparticles; Removal; Heavy metal ions; Polymer	none	BU ALI SINA UNIV;BU ALI SINA UNIV	BU ALI SINA UNIV		MADRAKIAN T, 2015, J IND ENG CHEM	MADRAKIAN T, 2015, J IND ENG CHEM	360 PARK AVE SOUTH, NEW YORK, NY 10010-1710 USA	BU ALI SINA UNIVERSITY		MADRAKIAN@BASU.AC.IR		2025-11-07	CC1CW	1876-794X			BU-ALI SINA UNIVERSITY RESEARCH COUNCIL; CENTER OF EXCELLENCE IN DEVELOPMENT OF ENVIRONMENTALLY FRIENDLY METHODS FOR CHEMICAL SYNTHESIS (CEDEFMCS)	THE AUTHORS ACKNOWLEDGE THE BU-ALI SINA UNIVERSITY RESEARCH COUNCIL AND CENTER OF EXCELLENCE IN DEVELOPMENT OF ENVIRONMENTALLY FRIENDLY METHODS FOR CHEMICAL SYNTHESIS (CEDEFMCS) FOR PROVIDING SUPPORT TO THIS WORK.	JAN 25
DONIA A;ATIA A;HENIESH A	SORPTION; MERCURY; BISTHIOUREA; CHELATING MAGNETIC RESINS; KINETICS; ADSORPTION PROPERTIES; MERCURY(II) IONS; BEHAVIOR; AMINE; MERCAPTAN; THIOUREA; NI(II)	SORPTION; MERCURY; BISTHIOUREA; CHELATING MAGNETIC RESINS; KINETICS	ADSORPTION PROPERTIES; MERCURY(II) IONS; BEHAVIOR; AMINE; MERCAPTAN; THIOUREA; NI(II)	ATIA, AA (CORRESPONDING AUTHOR), MENOUFIA UNIV, DEPT CHEM, FAC SCI, SHIBIN AL KAWM, EGYPT.; DONIA, AHMED M.; ATIA, ASEM A.; HENIESH, AMR M., MENOUFIA UNIV, DEPT CHEM, FAC SCI, SHIBIN AL KAWM, EGYPT.	SEP. PURIF. TECHNOL.	A MAGNETIC CHELATING RESIN WAS OBTAINED THROUGH COPOLYMERIZATION OF BISTHIOUREA/THIOUREA/GLUTARALDEHYDE IN THE PRESENCE OF MAGNETITE (FE3O4)THE RESIN OBTAINED WAS INVESTIGATED BY IR, X-RAY POWDER DIFFRACTION (XRD) AND ENERGY DISPERSIVE X-RAY (EDX) SPECTRA. THE SORPTION BEHAVIOUR OF THE RESIN TOWARDS HG(II) IN AQUEOUS SOLUTIONS WAS STUDIED. THE MAXIMUM UPTAKE CAPACITY WAS FOUND TO BE 4.4 MMOL/G AT…		ATIA, AA (CORRESPONDING AUTHOR), MENOUFIA UNIV, DEPT CHEM, FAC SCI, SHIBIN AL KAWM, EGYPT	10.1016/j.seppur.2007.07.045		1383-5866	SEPARATION AND PURIFICATION TECHNOLOGY	ENGLISH	70	1	46-53			ELSEVIER	ISI	EFFICIENT REMOVAL OF HG(II) USING MAGNETIC CHELATING RESIN DERIVED FROM COPOLYMERIZATION OF BISTHIOUREA/THIOUREA/GLUTARALDEHYDE	ARTICLE		60	2008	DONIA AHMED M;ATIA ASEM A;HENIESH AMR M	SEP PURIF TECHNOL	A magnetic chelating resin was obtained through copolymerization of bisthiourea/thiourea/glutaraldehyde in the presence of magnetite (Fe3O4)The resin obtained was investigated by IR, X-ray powder diffraction (XRD) and energy dispersive X-ray (EDX) spectra. The sorption behaviour of the resin towards Hg(II) in aqueous solutions was studied. The maximum uptake capacity was found to be 4.4 mmol/g at…	Efficient removal of Hg(II) using magnetic chelating resin derived from copolymerization of bisthiourea/thiourea/glutaraldehyde	sorption; mercury; bisthiourea; chelating magnetic resins; kinetics	none	MENOUFIA UNIV;MENOUFIA UNIV	MENOUFIA UNIV		DONIA A, 2008, SEP PURIF TECHNOL	DONIA A, 2008, SEP PURIF TECHNOL	RADARWEG 29, 1043 NX AMSTERDAM, NETHERLANDS	EGYPTIAN KNOWLEDGE BANK (EKB); MENOFIA UNIVERSITY		AHMEDDONIA2003@YAHOO.COM ASEMALI2010@YAHOO.COM AMR\_ZAKI618@YAHOO.COM		2025-11-07	291TO	1873-3794					APR 1
TANG J;HUANG Y;GONG Y;LYU H;WANG Q;MA J	GRAPHENE OXIDE/FE-MN; MERCURY REMOVAL; WATER TREATMENT; SORPTION; BIOLOGICAL EFFECTS; ELEMENTAL MERCURY; GRAPHITE OXIDE; IN-SITU; WATER; ADSORPTION; SURFACE; EQUILIBRIUM; ADSORBENT	GRAPHENE OXIDE/FE-MN; MERCURY REMOVAL; WATER TREATMENT; SORPTION; BIOLOGICAL EFFECTS	MERCURY REMOVAL; ELEMENTAL MERCURY; GRAPHITE OXIDE; IN-SITU; WATER; ADSORPTION; SORPTION; SURFACE; EQUILIBRIUM; ADSORBENT	GONG, YY (CORRESPONDING AUTHOR), NANKAI UNIV, COLL ENVIRONM SCI \& ENGN, TIANJIN 300350, PEOPLES R CHINA.; TANG, JINGCHUN; HUANG, YAO; GONG, YANYAN; LYU, HONGHONG, NANKAI UNIV, COLL ENVIRONM SCI \& ENGN, TIANJIN 300350, PEOPLES R CHINA.; TANG, JINGCHUN; GONG, YANYAN, MINIST EDUC, KEY LAB POLLUT PROC \& ENVIRONM CRITERIA, TIANJIN 300350, PEOPLES R CHINA.; TANG, JINGCHUN; GONG, YANYAN, TIANJIN ENGN…	J. HAZARD. MATER.	A NOVEL GRAPHENE OXIDE/FE-MN (GO/FE-MN) COMPOSITE WAS SYNTHESIZED (MOLAR RATIO OF FE/MN = 3/1 AND MASS RATIO OF FE/GO = 1/7.5) AND INVESTIGATED FOR THE SORPTION CHARACTERISTICS AND MECHANISMS OF AQUEOUS MERCURY (HG2+) AS WELL AS THE BIOLOGICAL EFFECTS TO WHEAT AND RICE. CHARACTERIZATION TESTS SHOWED THAT FE-MN OXIDES WERE IMPREGNATED ONTO GO SHEETS IN AN AMORPHOUS FORM THROUGH OXYGEN-CONTAINING F…		GONG, YY (CORRESPONDING AUTHOR), NANKAI UNIV, COLL ENVIRONM SCI \& ENGN, TIANJIN 300350, PEOPLES R CHINA	10.1016/j.jhazmat.2016.05.028		0304-3894	JOURNAL OF HAZARDOUS MATERIALS	ENGLISH	159		151-158			ELSEVIER SCIENCE BV	ISI	PREPARATION OF A NOVEL GRAPHENE OXIDE/FE-MN COMPOSITE AND ITS APPLICATION FOR AQUEOUS HG(II) REMOVAL	ARTICLE		316	2016	TANG JINGCHUN;HUANG YAO;GONG YANYAN;LYU HONGHONG; WANG QILIN;MA JIANLI	J HAZARD MATER	A novel graphene oxide/Fe-Mn (GO/Fe-Mn) composite was synthesized (molar ratio of Fe/Mn = 3/1 and mass ratio of Fe/GO = 1/7.5) and investigated for the sorption characteristics and mechanisms of aqueous mercury (Hg2+) as well as the biological effects to wheat and rice. Characterization tests showed that Fe-Mn oxides were impregnated onto GO sheets in an amorphous form through oxygen-containing f…	Preparation of a novel graphene oxide/Fe-Mn composite and its application for aqueous Hg(II) removal	Graphene oxide/Fe-Mn; Mercury removal; Water treatment; Sorption; Biological effects	none	NANKAI UNIV;NANKAI UNIV;KEY LAB POLLUT PROC AND ENVIRONM CRITERIA;TIANJIN ENGN CTR ENVIRONM DIAG AND CONTAMINAT;UNIV QUEENSLAND;TIANJIN ACAD ENVIRONM SCI	NANKAI UNIV		TANG J, 2016, J HAZARD MATER	TANG J, 2016, J HAZARD MATER	PO BOX 211, 1000 AE AMSTERDAM, NETHERLANDS	NANKAI UNIVERSITY; UNIVERSITY OF QUEENSLAND		YANYANGONG@NANKAI.EDU.CN		2025-11-07	DQ9YH	1873-3336			NATIONAL NATURAL SCIENCE FOUNDATION OF CHINA [41503085, 31270544]; 863 MAJOR PROGRAM [2013AA06A205]; SCIENTIFIC RESEARCH FOUNDATION FOR RETURNED OVERSEAS CHINESE SCHOLARS, MINISTRY OF EDUCATION OF CHINA [[2015]1098]; TIANJIN RESEARCH PROGRAM OF APPLICATION FOUNDATION AND ADVANCED TECHNOLOGY [15JCYBJC53800]; BEAUTIFUL TIANJIN SCIENTIFIC PROJECT [14ZCDGSF00033]	THIS WORK WAS PARTIALLY SUPPORTED BY NATIONAL NATURAL SCIENCE FOUNDATION OF CHINA (41503085, 31270544), A 863 MAJOR PROGRAM (2013AA06A205), A SCIENTIFIC RESEARCH FOUNDATION FOR RETURNED OVERSEAS CHINESE SCHOLARS, MINISTRY OF EDUCATION OF CHINA ([2015]1098), TIANJIN RESEARCH PROGRAM OF APPLICATION FOUNDATION AND ADVANCED TECHNOLOGY (15JCYBJC53800), AND A BEAUTIFUL TIANJIN SCIENTIFIC PROJECT (14ZCD…	OCT 5
BAO Q;LIU Y;LIANG Y;WEERASOORIYA R;LI H;WU Y;CHEN X	REDUCED GRAPHENE OXIDE; TEA POLYPHENOLS; NANO ZERO-VALENT IRON; ELECTROCHEMICAL DETERMINATION; MERCURY IONS; IRON NANOPARTICLES; AQUEOUS-SOLUTIONS; REMOVAL; MERCURY; AS(III); IONS; COMPOSITES; NITRATE; CD(II); PB(II)	REDUCED GRAPHENE OXIDE; TEA POLYPHENOLS; NANO ZERO-VALENT IRON; ELECTROCHEMICAL DETERMINATION; MERCURY IONS	IRON NANOPARTICLES; AQUEOUS-SOLUTIONS; REMOVAL; MERCURY; AS(III); IONS; COMPOSITES; NITRATE; CD(II); PB(II)	CHEN, X (CORRESPONDING AUTHOR), HEFEI UNIV TECHNOL, INST IND \& EQUIPMENT TECHNOL, KEY LAB AEROSP STRUCT PARTS FORMING TECHNOL \& EQUI, HEFEI 230009, PEOPLES R CHINA.; CHEN, X (CORRESPONDING AUTHOR), HEFEI UNIV TECHNOL, SCH MAT SCI \& ENGN, HEFEI 230009, PEOPLES R CHINA.; CHEN, X (CORRESPONDING AUTHOR), HEFEI UNIV TECHNOL, SCH RESOURCES \& ENVIRONM ENGN, HEFEI 230009, PEOPLES R CHINA.; BAO, QIAN-…	J. ELECTROANAL. CHEM.	HEREIN, WE HAVE DEVELOPED A CHEMICALLY MODIFIED GLASSY CARBON ELECTRODE (GCE) USING TEA POLYPHENOLS MEDIATED ZERO-VALENT IRON/REDUCED GRAPHENE OXIDE NANOCOMPOSITES (RGO-ZVI-P) FOR RAPID DETERMINATION OF HG2+ IN WATER. HIGHLY CONDUCTIVE RGO-ZVI-P WERE FABRICATED BY A GREEN CHEMICAL METHOD USING TEA POLYPHENOLS AS THE REDUCTANT. THE RGO-ZVI-P SHOWS A UNIQUE AFFINITY TO AQUEOUS HG2+ DUE TO A SYNERGY…		CHEN, X (CORRESPONDING AUTHOR), HEFEI UNIV TECHNOL, INST IND \& EQUIPMENT TECHNOL, KEY LAB AEROSP STRUCT PARTS FORMING TECHNOL \& EQUI, HEFEI 230009, PEOPLES R CHINA	10.1016/j.jelechem.2022.116428		1572-6657	JOURNAL OF ELECTROANALYTICAL CHEMISTRY	ENGLISH	13					ELSEVIER SCIENCE SA	ISI	TEA POLYPHENOLS MEDIATED ZERO-VALENT IRON/REDUCED GRAPHENE OXIDE NANOCOMPOSITES FOR ELECTROCHEMICAL DETERMINATION OF HG2+	ARTICLE		917	2022	BAO QIAN-XIN;LIU YAO;LIANG YUE-QING;WEERASOORIYA ROHAN;LI HENG;WU YU-CHENG;CHEN XING	J ELECTROANAL CHEM	Herein, we have developed a chemically modified glassy carbon electrode (GCE) using tea polyphenols mediated zero-valent iron/reduced graphene oxide nanocomposites (rGO-ZVI-P) for rapid determination of Hg2+ in water. Highly conductive rGO-ZVI-P were fabricated by a green chemical method using tea polyphenols as the reductant. The rGO-ZVI-P shows a unique affinity to aqueous Hg2+ due to a synergy…	Tea polyphenols mediated Zero-valent Iron/Reduced graphene oxide nanocomposites for electrochemical determination of Hg2+	Reduced graphene oxide; Tea polyphenols; Nano zero-valent iron; Electrochemical Determination; Mercury ions	none	HEFEI UNIV TECHNOL;HEFEI UNIV TECHNOL;HEFEI UNIV TECHNOL;HEFEI UNIV TECHNOL;HEFEI UNIV TECHNOL;HEFEI UNIV TECHNOL;NATL INST FUNDAMENTAL STUDIES	HEFEI UNIV TECHNOL		BAO Q, 2022, J ELECTROANAL CHEM	BAO Q, 2022, J ELECTROANAL CHEM	PO BOX 564, 1001 LAUSANNE, SWITZERLAND	HEFEI UNIVERSITY OF TECHNOLOGY; HEFEI UNIVERSITY OF TECHNOLOGY; HEFEI UNIVERSITY OF TECHNOLOGY; NATIONAL INSTITUTE OF FUNDAMENTAL STUDIES (NIFS)	116428	XINGCHEN@HFUT.EDU.CN		2025-11-07	1X9AC	1873-2569	MAY 2022		NATIONAL NATURAL SCIENCE FOUNDATION OF CHINA [21777164]; KEY SCIENCE AND TECHNOLOGY PROJECTS OF ANHUI PROVINCE [202003A07020004, G20200012010]	ACKNOWLEDGMENTS THE AUTHORS ACKNOWLEDGE THE FINANCIAL SUPPORT FROM THE NATIONAL NATURAL SCIENCE FOUNDATION OF CHINA (GRANT NO. 21777164) , AND KEY SCIENCE AND TECHNOLOGY PROJECTS OF ANHUI PROVINCE (202003A07020004) . R. W. ACKNOWLEDGES THE PROGRAM OF DISTIN-GUISHED PROFESSOR IN B\&R COUNTRIES (GRANT NO. G20200012010) .	JUL 15
LI Y;TAN M;LIU G;SI D;CHEN ;NING N;ZHOU D	SELECTIVE DETECTION; ELEMENTAL MERCURY; ENHANCED REMOVAL; ADSORPTION; ACID; NANOPARTICLES; SULFUR; IONS; HG2+; NANOMATERIALS		SELECTIVE DETECTION; ELEMENTAL MERCURY; ENHANCED REMOVAL; ADSORPTION; ACID; NANOPARTICLES; SULFUR; IONS; HG2+; NANOMATERIALS	CHEN, N (CORRESPONDING AUTHOR), NANJING UNIV, SCH ENVIRONM, STATE KEY LAB POLLUT CONTROL \& RESOURCE REUSE, NANJING 210023, JIANGSU, PEOPLES R CHINA.; LI, YULIANG; TAN, MENGXI; LIU, GUANGXIA; SI, DUNFENG; CHEN, NING; ZHOU, DONGMEI, NANJING UNIV, SCH ENVIRONM, STATE KEY LAB POLLUT CONTROL \& RESOURCE REUSE, NANJING 210023, JIANGSU, PEOPLES R CHINA.	J. MATER. CHEM. A	AQUEOUS MERCURY (HG) POLLUTION HAS AROUSED INCREASING CONCERN DUE TO ITS HARMFUL EFFECTS ON HUMAN HEALTH AND ENVIRONMENTAL SUSTAINABILITY. THE DEVELOPMENT OF HIGH-EFFICIENCY AND RECYCLABLE ADSORBENTS FOR HG REMOVAL IS OF GREAT SIGNIFICANCE IN AQUEOUS ENVIRONMENTS. HEREIN, WE SYNTHESIZE A FE3O4@DTIM (4-(5)-IMIDAZOLEDITHIOCARBOXYLIC ACID)-MOF (METAL-ORGANIC FRAMEWORK)@SH COMPOSITE AS A HIGH-EFFICIE…		CHEN, N (CORRESPONDING AUTHOR), NANJING UNIV, SCH ENVIRONM, STATE KEY LAB POLLUT CONTROL \& RESOURCE REUSE, NANJING 210023, JIANGSU, PEOPLES R CHINA	10.1039/d1ta10906e		2050-7488	JOURNAL OF MATERIALS CHEMISTRY A	ENGLISH	43	12	6724-6730			ROYAL SOC CHEMISTRY	ISI	THIOL-FUNCTIONALIZED METAL-ORGANIC FRAMEWORKS EMBEDDED WITH CHELATOR-MODIFIED MAGNETITE FOR HIGH-EFFICIENCY AND RECYCLABLE MERCURY REMOVAL IN AQUEOUS SOLUTIONS	ARTICLE		10	2022	LI YULIANG;TAN MENGXI;LIU GUANGXIA;SI DUNFENG;CHEN; NING;ZHOU DONGMEI	J MATER CHEM A	Aqueous mercury (Hg) pollution has aroused increasing concern due to its harmful effects on human health and environmental sustainability. The development of high-efficiency and recyclable adsorbents for Hg removal is of great significance in aqueous environments. Herein, we synthesize a Fe3O4@DTIM (4-(5)-imidazoledithiocarboxylic acid)-MOF (metal-organic framework)@SH composite as a high-efficie…	Thiol-functionalized metal-organic frameworks embedded with chelator-modified magnetite for high-efficiency and recyclable mercury removal in aqueous solutions		none	NANJING UNIV;NANJING UNIV	NANJING UNIV		LI Y, 2022, J MATER CHEM A	LI Y, 2022, J MATER CHEM A	THOMAS GRAHAM HOUSE, SCIENCE PARK, MILTON RD, CAMBRIDGE CB4 0WF, CAMBS, ENGLAND	NANJING UNIVERSITY		CHENNING@NJU.EDU.CN DMZHOU@NJU.EDU.CN		2025-11-07	ZX1SX	2050-7496	FEB 2022		NATIONAL NATURAL SCIENCE FOUNDATION OF CHINA [42130707, 41907309, 42107382, 22176091]; NATURAL SCIENCE FOUNDATION [BK20200323]	THE AUTHORS WOULD LIKE TO THANK THE GRANTS FROM NATIONAL NATURAL SCIENCE FOUNDATION OF CHINA (NO. 42130707, 41907309, 42107382, 22176091), AND THE NATURAL SCIENCE FOUNDATION (BK20200323) OF JIANGSU PROVINCE.	MAR 22
ZHAO Y;XIA K;ZHANG Z;ZHU Z;GUO ;YONGFU Y;QU Z	ADSORBENT; POLYPYRROLE; HEAVY METAL; MERCURY; MODIFICATION; THIOL-MODIFIED FE3O4-AT-SIO2; AQUEOUS-SOLUTION; HEAVY-METALS; MAGNETITE; NANOPARTICLES; EFFICIENT REMOVAL; MERCURY II; ADSORPTION; COMPOSITE; NANOCOMPOSITES; POLYANILINE	ADSORBENT; POLYPYRROLE; HEAVY METAL; MERCURY; MODIFICATION	THIOL-MODIFIED FE3O4-AT-SIO2; AQUEOUS-SOLUTION; HEAVY-METALS; MAGNETITE; NANOPARTICLES; EFFICIENT REMOVAL; MERCURY II; ADSORPTION; COMPOSITE; NANOCOMPOSITES; POLYANILINE	GUO, YF (CORRESPONDING AUTHOR), SUZHOU UNIV SCI \& TECHNOL, SCH ENVIRONM SCI \& ENGN, SUZHOU 215011, PEOPLES R CHINA.; GUO, YF (CORRESPONDING AUTHOR), SUZHOU UNIV SCI \& TECHNOL, JIANGSU PROV KEY LAB ENVIRONM SCI \& ENGN, SUZHOU 215011, PEOPLES R CHINA.; ZHAO, YUHAO; XIA, KAI; ZHANG, ZHENZONG; ZHU, ZIMING; GUO, YONGFU, SUZHOU UNIV SCI \& TECHNOL, SCH ENVIRONM SCI \& ENGN, SUZHOU 215011, PEOPLES R…	NANOMATERIALS	IN ORDER TO AVOID USING TOXIC OR HARMFUL OPERATIONAL CONDITIONS, SHORTEN SYNTHESIS TIME, ENHANCE ADSORPTION CAPACITY, AND REDUCE OPERATIONAL COST, A NOVEL MAGNETIC NANO-ADSORBENT OF COFE2O4@SIO2 WITH CORE-SHELL STRUCTURE WAS SUCCESSFULLY FUNCTIONALIZED WITH POLYPYRROLE (PPY). THE PHYSICAL AND CHEMICAL PROPERTIES OF COFE2O4@SIO2-PPY ARE EXAMINED BY VARIOUS MEANS. THE AS-PREPARED COFE2O4@SIO2-PPY N…		GUO, YF (CORRESPONDING AUTHOR), SUZHOU UNIV SCI \& TECHNOL, SCH ENVIRONM SCI \& ENGN, SUZHOU 215011, PEOPLES R CHINA	10.3390/nano9030455		2079-4991	NANOMATERIALS	ENGLISH	43	3				MDPI	ISI	FACILE SYNTHESIS OF POLYPYRROLE-FUNCTIONALIZED COFE2O4@SIO2 FOR REMOVAL FOR HG(II)	ARTICLE		9	2019	ZHAO YUHAO;XIA KAI;ZHANG ZHENZONG;ZHU ZIMING;GUO; YONGFU;QU ZAN	NANOMATERIALS	In order to avoid using toxic or harmful operational conditions, shorten synthesis time, enhance adsorption capacity, and reduce operational cost, a novel magnetic nano-adsorbent of CoFe2O4@SiO2 with core-shell structure was successfully functionalized with polypyrrole (Ppy). The physical and chemical properties of CoFe2O4@SiO2-Ppy are examined by various means. The as-prepared CoFe2O4@SiO2-Ppy n…	Facile Synthesis of Polypyrrole-Functionalized CoFe2O4@SiO2 for Removal for Hg(II)	adsorbent; polypyrrole; heavy metal; mercury; modification	none	SUZHOU UNIV SCI AND TECHNOL;SUZHOU UNIV SCI AND TECHNOL;SUZHOU UNIV SCI AND TECHNOL;SUZHOU UNIV SCI AND TECHNOL;SHANGHAI JIAO TONG UNIV	SUZHOU UNIV SCI AND TECHNOL		ZHAO Y, 2019, NANOMATERIALS	ZHAO Y, 2019, NANOMATERIALS	ST ALBAN-ANLAGE 66, CH-4052 BASEL, SWITZERLAND	SUZHOU UNIVERSITY OF SCIENCE \& TECHNOLOGY; SUZHOU UNIVERSITY OF SCIENCE \& TECHNOLOGY; SHANGHAI JIAO TONG UNIVERSITY	455	1713022014@POST.USTS.EDU.CN 1713022009@POST.USTS.EDU.CN 1713022013@POST.USTS.EDU.CN 1513022025@POST.USTS.EDU.CN YONGFUGUO@MAIL.USTS.EDU.CN QUZAN@SJTU.EDU.CN		2025-11-07	HT3CX				NATIONAL NATURAL SCIENCE FOUNDATION OF CHINA [51578354]; JIANGSU PROVINCIAL KEY LABORATORY OF ENVIRONMENTAL SCIENCE AND ENGINEERING [ZD201705]; NATURAL SCIENCE RESEARCH PROJECT OF JIANGSU PROVINCE HIGHER EDUCATION [18KJA610002]; SIX TALENT PEAKS PROGRAM [2016-JNHB-067]; QING LAN PROJECT OF JIANGSU PROVINCE	THIS RESEARCH WAS SUPPORTED BY THE NATIONAL NATURAL SCIENCE FOUNDATION OF CHINA GRANT NUMBER (51578354), JIANGSU PROVINCIAL KEY LABORATORY OF ENVIRONMENTAL SCIENCE AND ENGINEERING GRANT NUMBER (ZD201705), NATURAL SCIENCE RESEARCH PROJECT OF JIANGSU PROVINCE HIGHER EDUCATION (18KJA610002), SIX TALENT PEAKS PROGRAM (2016-JNHB-067) AND QING LAN PROJECT OF JIANGSU PROVINCE.	MAR 19
RAHMI R;FATHURRAHMI F;LELIFAJRI L;PURNAMAWATI F	MATERIALS CHEMISTRY; PHYSICAL CHEMISTRY; ANALYTICAL CHEMISTRY; WASTE-WATER; ADSORPTION BEHAVIOR; AQUEOUS-SOLUTION; METAL-IONS; EQUILIBRIUM; COMPOSITES; CU(II); CARBON; HG(II); PLANT	MATERIALS CHEMISTRY; PHYSICAL CHEMISTRY; ANALYTICAL CHEMISTRY	WASTE-WATER; ADSORPTION BEHAVIOR; AQUEOUS-SOLUTION; METAL-IONS; EQUILIBRIUM; COMPOSITES; CU(II); CARBON; HG(II); PLANT	RAHMI (CORRESPONDING AUTHOR), UNIV SYIAH KUALA, CHEM DEPT, BANDA ACEH, INDONESIA.; RAHMI; FATHURRAHMI; LELIFAJRI; PURNAMAWATI, FITRI, UNIV SYIAH KUALA, CHEM DEPT, BANDA ACEH, INDONESIA.	HELIYON	PREPARATION OF MAGNETIC CHITOSAN FOR MERCURY REMOVAL FROM POLLUTED WATER HAD BEEN CONDUCTED. MAGNETIC PARTICLES (FE3O4) WERE ISOLATED FROM LOCAL IRON SAND TO PROVIDE MAGNETIC PROPERTIES OF CHITOSAN. GLUTARALDEHYDE WAS USED AS CROSSLINKING AGENT OF CHITOSAN. THE OBTAINED MAGNETIC CHITOSAN WAS CHARACTERIZED BY USING FTIR, TGA, DSC, XRD, AND SEM. ADSORPTION EXPERIMENTS WERE CONDUCTED WITH VARIOUS CO…		RAHMI (CORRESPONDING AUTHOR), UNIV SYIAH KUALA, CHEM DEPT, BANDA ACEH, INDONESIA	10.1016/j.heliyon.2019.e01731			HELIYON	ENGLISH	35	5				ELSEVIER SCI LTD	ISI	PREPARATION OF MAGNETIC CHITOSAN USING LOCAL IRON SAND FOR MERCURY REMOVAL	ARTICLE		5	2019	RAHMI;FATHURRAHMI;LELIFAJRI;PURNAMAWATI FITRI	HELIYON	Preparation of magnetic chitosan for mercury removal from polluted water had been conducted. Magnetic particles (Fe3O4) were isolated from local iron sand to provide magnetic properties of chitosan. Glutaraldehyde was used as crosslinking agent of chitosan. The obtained magnetic chitosan was characterized by using FTIR, TGA, DSC, XRD, and SEM. Adsorption experiments were conducted with various co…	Preparation of magnetic chitosan using local iron sand for mercury removal	Materials chemistry; Physical chemistry; Analytical chemistry	none	UNIV SYIAH KUALA;UNIV SYIAH KUALA	UNIV SYIAH KUALA		RAHMI R, 2019, HELIYON	RAHMI R, 2019, HELIYON	THE BOULEVARD, LANGFORD LANE, KIDLINGTON, OXFORD OX5 1GB, OXON, ENGLAND	UNIVERSITAS SYIAH KUALA	E01731	RAHMI@FMIPA.UNSYIAH.AC.ID		2025-11-07	IG1OR	2405-8440			DIREKTORAT RISET DAN PENGABDIAN MASYARAKAT, DIREKTORAT JENDERAL PENGUATAN RISET DAN PENGEMBANGAN KEMENTERIAN RISET, TEKNOLOGI, DAN PENDIDIKAN TINGGI REPUBLIK INDONESIA [04/UN11.2/PP/SP3/2018]	THIS WORK WAS SUPPORTED BY DIREKTORAT RISET DAN PENGABDIAN MASYARAKAT, DIREKTORAT JENDERAL PENGUATAN RISET DAN PENGEMBANGAN KEMENTERIAN RISET, TEKNOLOGI, DAN PENDIDIKAN TINGGI REPUBLIK INDONESIA (GRANT NUMBER 04/UN11.2/PP/SP3/2018).	MAY
ZHANG Q;WU J;LUO X	ION-IMPRINTED POLYMER; SOL-GEL PROCESS; WATER SAMPLES; ENVIRONMENTAL-SAMPLES; MERCURY; ADSORPTION; SILICA; HG2+; EXTRACTION; MONOMER		ION-IMPRINTED POLYMER; SOL-GEL PROCESS; WATER SAMPLES; ENVIRONMENTAL-SAMPLES; MERCURY; ADSORPTION; SILICA; HG2+; EXTRACTION; MONOMER	LUO, XB (CORRESPONDING AUTHOR), NANCHANG HANGKONG UNIV, KEY LAB JIANGXI PROV PERSISTENT POLLUTANTS CONTRO, NANCHANG 330063, PEOPLES R CHINA.; ZHANG, QIUGEN; WU, JINGYI; LUO, XUBIAO, NANCHANG HANGKONG UNIV, KEY LAB JIANGXI PROV PERSISTENT POLLUTANTS CONTRO, NANCHANG 330063, PEOPLES R CHINA.	RSC ADV.	A NOVEL MAGNETIC ION-IMPRINTED POLYMER (MIIP) WITH INCORPORATED FE3O4@SIO2 NANOPARTICLES WAS SYNTHESIZED VIA A SURFACE IMPRINTING TECHNIQUE USING ALLYLTHIOUREA (ATU) AS A FUNCTIONAL MONOMER. THE MIIP HAS AN EXCELLENT SATURATION MAGNETIZATION OF 15.9403 EMU G(-1). SOLUTION PH VALUES HAD AN IMMEDIATE INFLUENCE ON THE HG(II) ADSORPTION CAPACITY WITH OPTIMAL REMOVAL OCCURRING AT PH 6. THE ADSORPTIVIT…		LUO, XB (CORRESPONDING AUTHOR), NANCHANG HANGKONG UNIV, KEY LAB JIANGXI PROV PERSISTENT POLLUTANTS CONTRO, NANCHANG 330063, PEOPLES R CHINA	10.1039/c5ra22008d		2046-2069	RSC ADVANCES	ENGLISH	49	18	14916-14926			ROYAL SOC CHEMISTRY	ISI	FACILE PREPARATION OF A NOVEL HG(II)-ION-IMPRINTED POLYMER BASED ON MAGNETIC HYBRIDS FOR RAPID AND HIGHLY SELECTIVE REMOVAL OF HG(II) FROM AQUEOUS SOLUTIONS	ARTICLE		6	2016	ZHANG QIUGEN;WU JINGYI;LUO XUBIAO	RSC ADV	A novel magnetic ion-imprinted polymer (MIIP) with incorporated Fe3O4@SiO2 nanoparticles was synthesized via a surface imprinting technique using allylthiourea (ATU) as a functional monomer. The MIIP has an excellent saturation magnetization of 15.9403 emu g(-1). Solution pH values had an immediate influence on the Hg(II) adsorption capacity with optimal removal occurring at pH 6. The adsorptivit…	Facile preparation of a novel Hg(II)-ion-imprinted polymer based on magnetic hybrids for rapid and highly selective removal of Hg(II) from aqueous solutions		none	NANCHANG HANGKONG UNIV;NANCHANG HANGKONG UNIV	NANCHANG HANGKONG UNIV		ZHANG Q, 2016, RSC ADV	ZHANG Q, 2016, RSC ADV	THOMAS GRAHAM HOUSE, SCIENCE PARK, MILTON RD, CAMBRIDGE CB4 0WF, CAMBS, ENGLAND	NANCHANG HANGKONG UNIVERSITY		LUOXUBIAO@126.COM		2025-11-07	DD1CG				NATURAL SCIENCE FOUNDATION OF CHINA [51178213, 51238002, 51272099]; NATIONAL SCIENCE FUND FOR EXCELLENT YOUNG SCHOLARS [51422807]	THIS STUDY WAS FINANCIALLY SUPPORTED BY THE NATURAL SCIENCE FOUNDATION OF CHINA (51178213, 51238002, 51272099) AND THE NATIONAL SCIENCE FUND FOR EXCELLENT YOUNG SCHOLARS (51422807).
HAKAMI O;ZHANG Y;BANKS C	MERCURY; MAGNETITE; MESOPOROUS; ADSORPTION; DESORPTION; LOW-COST ADSORBENTS; AQUEOUS-SOLUTION; TRACE AMOUNTS; HEAVY-METALS; WASTE-WATER; TEMPERATURE; CAPACITY; SAMPLES	MERCURY; MAGNETITE; MESOPOROUS; ADSORPTION; DESORPTION	LOW-COST ADSORBENTS; AQUEOUS-SOLUTION; TRACE AMOUNTS; HEAVY-METALS; WASTE-WATER; ADSORPTION; MERCURY; TEMPERATURE; CAPACITY; SAMPLES	HAKAMI, O (CORRESPONDING AUTHOR), UNIV SOUTHAMPTON, FAC ENGN \& ENVIRONM, SOUTHAMPTON SO17 1BJ, HANTS, ENGLAND.; HAKAMI, OTHMAN; ZHANG, YUE; BANKS, CHARLES J., UNIV SOUTHAMPTON, FAC ENGN \& ENVIRONM, SOUTHAMPTON SO17 1BJ, HANTS, ENGLAND.	WATER RES.	THE PREPARATION AND TESTING OF THIOL-FUNCTIONALISED SILICA-COATED MAGNETITE NANOPARTICLES (TF-SCMNPS) IS DESCRIBED. THE CHARACTERISTICS OF THESE PARTICLES ARE ASSESSED AT DIFFERENT STAGES IN THE PRODUCTION PROCESS USING X-RAY DIFFRACTION (XRD), TRANSMISSION ELECTRON MICROSCOPY (TEM), FOURIER TRANSFORM INFRARED SPECTROSCOPY (FTIR), AND A MAGNETOMETER. THE PARTICLES WERE FOUND TO BE ALMOST SPHERICA…		HAKAMI, O (CORRESPONDING AUTHOR), UNIV SOUTHAMPTON, FAC ENGN \& ENVIRONM, SOUTHAMPTON SO17 1BJ, HANTS, ENGLAND	10.1016/j.watres.2012.04.032		0043-1354	WATER RESEARCH	ENGLISH	304	12	3913-3922			PERGAMON-ELSEVIER SCIENCE LTD	ISI	THIOL-FUNCTIONALISED MESOPOROUS SILICA-COATED MAGNETITE NANOPARTICLES FOR HIGH EFFICIENCY REMOVAL AND RECOVERY OF HG FROM WATER	ARTICLE		46	2012	HAKAMI OTHMAN;ZHANG YUE;BANKS CHARLES J	WATER RES	The preparation and testing of thiol-functionalised silica-coated magnetite nanoparticles (TF-SCMNPs) is described. The characteristics of these particles are assessed at different stages in the production process using X-ray diffraction (XRD), transmission electron microscopy (TEM), Fourier Transform Infrared Spectroscopy (FTIR), and a magnetometer. The particles were found to be almost spherica…	Thiol-functionalised mesoporous silica-coated magnetite nanoparticles for high efficiency removal and recovery of Hg from water	Mercury; Magnetite; Mesoporous; Adsorption; Desorption	none	UNIV SOUTHAMPTON;UNIV SOUTHAMPTON	UNIV SOUTHAMPTON		HAKAMI O, 2012, WATER RES	HAKAMI O, 2012, WATER RES	THE BOULEVARD, LANGFORD LANE, KIDLINGTON, OXFORD OX5 1GB, ENGLAND	UNIVERSITY OF SOUTHAMPTON		O.HAKAMI@SOTON.AC.UK		2025-11-07	961AJ				MINISTRY OF HIGHER EDUCATION OF THE KINGDOM OF SAUDI ARABIA (UNIVERSITY OF JAZAN)	THE AUTHORS WOULD LIKE TO THANK THE MINISTRY OF HIGHER EDUCATION OF THE KINGDOM OF SAUDI ARABIA (UNIVERSITY OF JAZAN) FOR PHD FUNDING IN SUPPORT OF THIS WORK.	AUG
ANIRUDHAN T;SHAINY F	NANOCELLULOSE; MAGNETITE NANOCELLULOSE; DESORPTION; ADSORPTION KINETICS; ISOTHERM; GRAFT CO-POLYMERIZATION; HEAVY-METAL IONS; AQUEOUS-SOLUTIONS; ADSORPTION; CELLULOSE; ADSORBENT	NANOCELLULOSE; MAGNETITE NANOCELLULOSE; DESORPTION; ADSORPTION KINETICS; ISOTHERM; GRAFT CO-POLYMERIZATION	HEAVY-METAL IONS; AQUEOUS-SOLUTIONS; ADSORPTION; CELLULOSE; ADSORBENT	ANIRUDHAN, TS (CORRESPONDING AUTHOR), UNIV KERALA, SCH PHYS \& MATH SCI, DEPT CHEM, TRIVANDRUM 695581, KERALA, INDIA.; ANIRUDHAN, T. S.; SHAINY, F., UNIV KERALA, SCH PHYS \& MATH SCI, DEPT CHEM, TRIVANDRUM 695581, KERALA, INDIA.	J. COLLOID INTERFACE SCI.	A NOVEL ADSORBENT, 2-MERCAPTOBENZAMIDE MODIFIED ITACONIC ACID-GRAFTED-MAGNETITE NANOCELLULOSE COMPOSITE[P(MB-IA)-G-MNCC] WAS SYNTHESIZED FOR ADSORBING MERCURY(II) [HG(II)] IONS SELECTIVELY FROM AQUEOUS SOLUTIONS. FOURIER TRANSFORMS INFRARED SPECTROSCOPY, X-RAY DIFFRACTION, SCANNING ELECTRON MICROSCOPY AND THERMOGRAVIMETRIC STUDIES WERE PERFORMED TO CHARACTERIZE THE ADSORBENT. THE OPTIMUM PH FOR H…		ANIRUDHAN, TS (CORRESPONDING AUTHOR), UNIV KERALA, SCH PHYS \& MATH SCI, DEPT CHEM, TRIVANDRUM 695581, KERALA, INDIA	10.1016/j.jcis.2015.05.052		0021-9797	JOURNAL OF COLLOID AND INTERFACE SCIENCE	ENGLISH	97		22-31			ACADEMIC PRESS INC ELSEVIER SCIENCE	ISI	EFFECTIVE REMOVAL OF MERCURY(II) IONS FROM CHLOR-ALKALI INDUSTRIAL WASTEWATER USING 2-MERCAPTOBENZAMIDE MODIFIED ITACONIC ACID-GRAFTED-MAGNETITE NANOCELLULOSE COMPOSITE	ARTICLE		456	2015	ANIRUDHAN T S;SHAINY F	J COLLOID INTERFACE SCI	A novel adsorbent, 2-mercaptobenzamide modified itaconic acid-grafted-magnetite nanocellulose composite[P(MB-IA)-g-MNCC] was synthesized for adsorbing mercury(II) [Hg(II)] ions selectively from aqueous solutions. Fourier transforms infrared spectroscopy, X-ray diffraction, scanning electron microscopy and thermogravimetric studies were performed to characterize the adsorbent. The optimum pH for H…	Effective removal of mercury(II) ions from chlor-alkali industrial wastewater using 2-mercaptobenzamide modified itaconic acid-grafted-magnetite nanocellulose composite	Nanocellulose; Magnetite nanocellulose; Desorption; Adsorption kinetics; Isotherm; Graft co-polymerization	none	UNIV KERALA;UNIV KERALA	UNIV KERALA		ANIRUDHAN T, 2015, J COLLOID INTERFACE SCI	ANIRUDHAN T, 2015, J COLLOID INTERFACE SCI	525 B ST, STE 1900, SAN DIEGO, CA 92101-4495 USA	UNIVERSITY OF KERALA		TSANI@REDIFFMAIL.COM		2025-11-07	CN5GT	1095-7103			UNIVERSITY GRANTS COMMISSION, NEW DELHI, INDIA	THE AUTHORS ARE THANKFUL TO HEAD, DEPARTMENT OF CHEMISTRY, UNIVERSITY OF KERALA, TRIVANDRUM, INDIA FOR PROVIDING THE LABORATORY FACILITIES. ONE OF THE AUTHORS MRS. SHAINY F. IS GRATEFUL TO UNIVERSITY GRANTS COMMISSION, NEW DELHI, INDIA, FOR PROVIDING ASSISTANCE IN THE FORM OF A RESEARCH FELLOWSHIP FOR THIS WORK.	OCT 15
TIAN H;HE J;HU M	MOS2 NANOSHEETS; MAGNETIC SEPARATION; ENRICHMENT; MERCURY REMOVAL; SELECTIVITY; COVALENT ORGANIC FRAMEWORKS; SOLID-PHASE MICROEXTRACTION; EFFICIENT; REMOVAL; HIGHLY EFFICIENT; HEAVY-METALS; AQUEOUS-SOLUTIONS; MOS2; NANOSHEETS; ADSORPTION; HG(II); NANOPARTICLES	MOS2 NANOSHEETS; MAGNETIC SEPARATION; ENRICHMENT; MERCURY REMOVAL; SELECTIVITY	COVALENT ORGANIC FRAMEWORKS; SOLID-PHASE MICROEXTRACTION; EFFICIENT; REMOVAL; HIGHLY EFFICIENT; HEAVY-METALS; AQUEOUS-SOLUTIONS; MOS2; NANOSHEETS; ADSORPTION; HG(II); NANOPARTICLES	HE, JH (CORRESPONDING AUTHOR), CHINESE ACAD SCI, FUNCT NANOMAT LAB, CTR MICRO NANOMAT \& TECHNOL, BEIJING 100190, PEOPLES R CHINA.; HE, JH (CORRESPONDING AUTHOR), CHINESE ACAD SCI, KEY LAB PHOTOCHEM CONVERS \& OPTOELECT MAT, TECH INST PHYS \& CHEM, BEIJING 100190, PEOPLES R CHINA.; TIAN, HUA; HE, JUNHUI; HU, MINGHUA, CHINESE ACAD SCI, FUNCT NANOMAT LAB, CTR MICRO NANOMAT \& TECHNOL, BEIJING 10019…	J. COLLOID INTERFACE SCI.	ALTHOUGH THE MERCURY POLLUTION IS DECLINING IN THE WESTERN AND EUROPEAN PARTS OF THE WORLD, IT IS STILL A WIDESPREAD ENVIRONMENTAL CONCERN BECAUSE OF ITS NOTORIOUS TOXIC EFFECTS ON AQUATIC ECOSYSTEMS AND HUMAN HEALTH. SELECTIVE AND RAPID ENRICHMENT IS ESSENTIAL FOR TIMELY MONITORING AND EFFICIENT REMOVAL OF TRACE MERCURY CONTAMINANTS, BUT HAS SO FAR BEEN A BIG CHALLENGE. IN THE CURRENT WORK, WE R…		HE, JH (CORRESPONDING AUTHOR), CHINESE ACAD SCI, FUNCT NANOMAT LAB, CTR MICRO NANOMAT \& TECHNOL, BEIJING 100190, PEOPLES R CHINA	10.1016/j.jcis.2019.05.027		0021-9797	JOURNAL OF COLLOID AND INTERFACE SCIENCE	ENGLISH	33		251-260			ACADEMIC PRESS INC ELSEVIER SCIENCE	ISI	A SELECTIVITY-CONTROLLED ADSORBENT OF MOLYBDENUM DISULFIDE NANOSHEETS ARMED WITH SUPERPARAMAGNETISM FOR RAPID CAPTURE OF MERCURY IONS	ARTICLE		551	2019	TIAN HUA;HE JUNHUI;HU MINGHUA	J COLLOID INTERFACE SCI	Although the mercury pollution is declining in the Western and European parts of the world, it is still a widespread environmental concern because of its notorious toxic effects on aquatic ecosystems and human health. Selective and rapid enrichment is essential for timely monitoring and efficient removal of trace mercury contaminants, but has so far been a big challenge. In the current work, we r…	A selectivity-controlled adsorbent of molybdenum disulfide nanosheets armed with superparamagnetism for rapid capture of mercury ions	MoS2 nanosheets; Magnetic separation; Enrichment; Mercury removal; Selectivity	none	CHINESE ACAD SCI;TECH INST PHYS AND CHEM;CHINESE ACAD SCI;TECH INST PHYS AND CHEM;UNIV CHINESE ACAD SCI	CHINESE ACAD SCI		TIAN H, 2019, J COLLOID INTERFACE SCI	TIAN H, 2019, J COLLOID INTERFACE SCI	525 B ST, STE 1900, SAN DIEGO, CA 92101-4495 USA	CHINESE ACADEMY OF SCIENCES; CHINESE ACADEMY OF SCIENCES; TECHNICAL INSTITUTE OF PHYSICS \& CHEMISTRY, CAS; CHINESE ACADEMY OF SCIENCES; UNIVERSITY OF CHINESE ACADEMY OF SCIENCES, CAS		JHHE@MAIL.IPC.AC.CN		2025-11-07	IF8VT	1095-7103			NATIONAL KEY RESEARCH AND DEVELOPMENT PROGRAM OF CHINA [2017YFA0207102]; NATIONAL NATURAL SCIENCE FOUNDATION OF CHINA [21571182, 21271177]; KEY LABORATORY OF PHOTOCHEMICAL CONVERSION AND OPTOELECTRONIC MATERIALS, CAS	THIS WORK WAS SUPPORTED BY THE NATIONAL KEY RESEARCH AND DEVELOPMENT PROGRAM OF CHINA (2017YFA0207102), THE NATIONAL NATURAL SCIENCE FOUNDATION OF CHINA (21571182, 21271177), AND KEY LABORATORY OF PHOTOCHEMICAL CONVERSION AND OPTOELECTRONIC MATERIALS, CAS.	SEP 1
RAJ A;BAUMAN M;LAKIC M;DIMITRUSEV N;LOBNIK A;KOSAK A	SUPERPARAMAGNETIC NANOPARTICLES; IRON-OXIDE; MAGHEMITE; FUNCTIONALIZATION; AMINOPROPYLTRIMETHOXYSILANE; ADSORPTION; DESORPTION; LEAD; CHROMIUM; MERCURY; CIRCULAR ECONOMY; HEAVY-METAL IONS; MESOPOROUS SILICA; WASTE-WATER; FE3O4 NANOPARTICLES; EFFICIENT REMOVAL; ACTIVATED CARBON; GRAPHENE OXIDE; PB(II)	SUPERPARAMAGNETIC NANOPARTICLES; IRON-OXIDE; MAGHEMITE; FUNCTIONALIZATION; AMINOPROPYLTRIMETHOXYSILANE; ADSORPTION; DESORPTION; LEAD; CHROMIUM; MERCURY; CIRCULAR ECONOMY	HEAVY-METAL IONS; MESOPOROUS SILICA; WASTE-WATER; FE3O4 NANOPARTICLES; EFFICIENT REMOVAL; ACTIVATED CARBON; GRAPHENE OXIDE; ADSORPTION; MERCURY; PB(II)	KOSAK, A (CORRESPONDING AUTHOR), INST ENVIRONM PROTECT \& SENSORS LTD, IOS, BELORUSKA 7, SI-2000 MARIBOR, SLOVENIA.; RAJ, A. F. P. ALLWIN MABES; BAUMAN, MAJA; LAKIC, MARIJANA; DIMITRUSEV, NENA; LOBNIK, ALEKSANDRA; KOSAK, ALJOSA, INST ENVIRONM PROTECT \& SENSORS LTD, IOS, BELORUSKA 7, SI-2000 MARIBOR, SLOVENIA.; RAJ, A. F. P. ALLWIN MABES, JOZEF STEFAN INT POSTGRAD SCH, JAMOVA 39, LJUBLJANA 1000, …	INT. J. MOL. SCI.	IN THIS PAPER, A CIRCULAR ECONOMY APPROACH WITH THE ADSORPTION AND DESORPTION OF HEAVY METAL (HM) IONS-I.E., LEAD (PB2+), CHROMIUM (CRT), AND MERCURY (HG2+)-FROM AQUEOUS SOLUTIONS WAS STUDIED. SPECIFIC AND SELECTIVE BINDING OF HM IONS WAS PERFORMED ON STABILIZED AND AMINO-FUNCTIONALIZED IRON OXIDE MAGNETIC NANOPARTICLES (GAMMA-FE2O3@NH2 NPS) FROM AN AQUEOUS SOLUTION AT PH 4 AND 7. FOR THIS PURPOS…		KOSAK, A (CORRESPONDING AUTHOR), INST ENVIRONM PROTECT \& SENSORS LTD, IOS, BELORUSKA 7, SI-2000 MARIBOR, SLOVENIA	10.3390/ijms232416186		1661-6596	INTERNATIONAL JOURNAL OF MOLECULAR SCIENCES	ENGLISH	16	24				MDPI	ISI	REMOVAL OF PB2+, CRT, AND HG2+ IONS FROM AQUEOUS SOLUTIONS USING AMINO-FUNCTIONALIZED MAGNETIC NANOPARTICLES	ARTICLE		23	2022	RAJ A F P ALLWIN MABES;BAUMAN MAJA;LAKIC MARIJANA; DIMITRUSEV NENA;LOBNIK ALEKSANDRA;KOSAK ALJOSA	INT J MOL SCI	In this paper, a circular economy approach with the adsorption and desorption of heavy metal (HM) ions-i.e., lead (Pb2+), chromium (CrT), and mercury (Hg2+)-from aqueous solutions was studied. Specific and selective binding of HM ions was performed on stabilized and amino-functionalized iron oxide magnetic nanoparticles (gamma-Fe2O3@NH2 NPs) from an aqueous solution at pH 4 and 7. For this purpos…	Removal of Pb2+, CrT, and Hg2+ Ions from Aqueous Solutions Using Amino-Functionalized Magnetic Nanoparticles	superparamagnetic nanoparticles; iron-oxide; maghemite; functionalization; aminopropyltrimethoxysilane; adsorption; desorption; lead; chromium; mercury; circular economy	none	INST ENVIRONM PROTECT AND SENSORS LTD;INST ENVIRONM PROTECT AND SENSORS LTD;JOZEF STEFAN INT POSTGRAD SCH;JOZEF STEFAN INST;UNIV MARIBOR	INST ENVIRONM PROTECT AND SENSORS LTD		RAJ A, 2022, INT J MOL SCI	RAJ A, 2022, INT J MOL SCI	ST ALBAN-ANLAGE 66, CH-4052 BASEL, SWITZERLAND	SLOVENIAN ACADEMY OF SCIENCES \& ARTS (SASA); JOZEF STEFAN INSTITUTE; UNIVERSITY OF MARIBOR	16186	MAJA.BAUMAN@IOS.SI ALEKSANDRA.LOBNIK@UM.SI ALJOSA.KOSAK@UM.SI		2025-11-07	7G3QA	1422-0067			EUROSTARS-2 JOINT PROGRAM [E! 113543]; SLOVENIAN MINISTRY OF ECONOMIC DEVELOPMENT AND TECHNOLOGY (MEDT); INTERNATIONAL RESEARCH PROJECT-THE MARIE SKLODOWSKA-CURIE ACTION ``GLOBAL MERCURY OBSERVATION AND TRAINING NETWORK IN SUPPORT TO THE MINAMATA CONVENTION'' UNDER THE FUNDING LINE ``EXCELLENT SCIENCE'' OF THE HORIZON 2020 RESEARCH AND INNOVATION PROGRAM OF THE E [860497]; RESEARCH PROGRAM ``DESI…	THE PROJECT HMRECYCLE (E! 113543) HAS RECEIVED FUNDING FROM THE EUROSTARS-2 JOINT PROGRAM. WE EXPRESS OUR GRATITUDE TO THE NATIONAL FUNDING ORGANIZATION-THE SLOVENIAN MINISTRY OF ECONOMIC DEVELOPMENT AND TECHNOLOGY (MEDT)-FOR CO-FINANCING THE PROJECT HMRECYCLE. THIS WORK IS ALSO SUPPORTED BY AN INTERNATIONAL RESEARCH PROJECT-THE MARIE SKLODOWSKA-CURIE ACTION ``GLOBAL MERCURY OBSERVATION AND TRAIN…	DEC
MA Y;XING D;LU C;DU X;LA ;PEI-QING P	ACTIVATED CARBON; MERCURY REMOVAL; ADSORPTION; WATER; ION; SEPARATION; SILICA; ADSORBENT; AMINE; HG2+		ACTIVATED CARBON; MERCURY REMOVAL; ADSORPTION; WATER; ION; SEPARATION; SILICA; ADSORBENT; AMINE; HG2+	MA, YX (CORRESPONDING AUTHOR), LANZHOU UNIV TECHNOL, STATE KEY LAB ADV PROC \& RECYCLING NONFERROUS MET, KEY LAB NONFERROUS MET ALLOYS \& PROC, MINIST EDUC,SCH MAT SCI \& ENGN, LANZHOU 730050, GANSU, PEOPLES R CHINA.; MA, YING-XIA; XING, DAN; LU, CUI-PING; DU, XUE-YAN; LA, PEI-QING, LANZHOU UNIV TECHNOL, STATE KEY LAB ADV PROC \& RECYCLING NONFERROUS MET, KEY LAB NONFERROUS MET ALLOYS \& PROC, MI…	POLYM. COMPOS.	IN THIS STUDY, DICYANDIAMIDE (DCDA) MODIFIED POLYSTYRENE (PS) RESIN BEADS DECORATED WITH NANO-FE3O4 (FE3O4-PS-DCDA HYBRIDS) WERE PREPARED BY CO-PRECIPITATION METHOD. THE FE3O4-PS-DCDA HYBRIDS WERE CHARACTERIZED BY SCANNING ELECTRON MICROSCOPY (SEM), FOURIER TRANSFORM-INFRARED (FT-IR) SPECTROSCOPY, X-RAY DIFFRACTION (XRD) SPECTROSCOPY, X-RAY PHOTOELECTRON SPECTROSCOPY (XPS), NITROGEN ADSORPTION/DE…		MA, YX (CORRESPONDING AUTHOR), LANZHOU UNIV TECHNOL, STATE KEY LAB ADV PROC \& RECYCLING NONFERROUS MET, KEY LAB NONFERROUS MET ALLOYS \& PROC, MINIST EDUC,SCH MAT SCI \& ENGN, LANZHOU 730050, GANSU, PEOPLES R CHINA	10.1002/pc.24187		0272-8397	POLYMER COMPOSITES	ENGLISH	8	7	2232-2240			WILEY	ISI	PREPARATION OF DICYANDIAMIDE MODIFIED POLYSTYRENE RESIN BEADS DECORATED WITH NANO-FE3O4 FOR REMOVING HG(II) FROM AQUEOUS SOLUTION	ARTICLE		39	2018	MA YING-XIA;XING DAN;LU CUI-PING;DU XUE-YAN;LA; PEI-QING	POLYM COMPOS	In this study, dicyandiamide (DCDA) modified polystyrene (PS) resin beads decorated with nano-Fe3O4 (Fe3O4-PS-DCDA hybrids) were prepared by co-precipitation method. The Fe3O4-PS-DCDA hybrids were characterized by scanning electron microscopy (SEM), Fourier transform-infrared (FT-IR) spectroscopy, X-ray diffraction (XRD) spectroscopy, X-ray photoelectron spectroscopy (XPS), nitrogen adsorption/de…	Preparation of Dicyandiamide Modified Polystyrene Resin Beads Decorated With Nano-Fe3O4 for Removing Hg(II) From Aqueous Solution		none	LANZHOU UNIV TECHNOL;LANZHOU UNIV TECHNOL	LANZHOU UNIV TECHNOL		MA Y, 2018, POLYM COMPOS	MA Y, 2018, POLYM COMPOS	111 RIVER ST, HOBOKEN 07030-5774, NJ USA	LANZHOU UNIVERSITY OF TECHNOLOGY		MAYX2011818@163.COM		2025-11-07	GP9PX	1548-0569					JUL
LUAN L;TANG B;LIU Y;WANG A;ZHANG B;XU W;NIU Y	MAGNETIC FE3O4; SULFUR-FUNCTIONALIZED PAMAM DENDRIMER; SELECTIVE; ADSORPTION; HG(II); AG(I)	MAGNETIC FE3O4; SULFUR-FUNCTIONALIZED PAMAM DENDRIMER; SELECTIVE; ADSORPTION; HG(II); AG(I)		NIU, YZ (CORRESPONDING AUTHOR), LUDONG UNIV, SCH CHEM \& MAT SCI, YANTAI 264025, PEOPLES R CHINA.; LUAN, LIPING; TANG, BENTIAN; LIU, YONGFENG; WANG, AILI; ZHANG, BEIBEI; XU, WENLONG; NIU, YUZHONG, LUDONG UNIV, SCH CHEM \& MAT SCI, YANTAI 264025, PEOPLES R CHINA.	SEP. PURIF. TECHNOL.	HEAVY METAL IONS POLLUTION IN WATER SYSTEM HAS BEEN IMPOSING SERIOUS DAMAGE TO AQUATIC ECOSYSTEM AND PUBLIC HEALTH. EFFICIENT AND SELECTIVE CAPTURE OF TARGETED METAL ION FROM WATER IS A GREAT CHALLENGE AND THE FOCUS OF EXTENSIVE RESEARCH. HEREIN, SULFUR-FUNCTIONALIZED POLYAMIDOAMINE (PAMAM) DENDRIMER/MAGNETIC FE3O4 HYBRID MATERIALS WERE CONSTRUCTED FOR CAPTURING HG(II) AND AG(I) FROM WATER SOLUTI…		NIU, YZ (CORRESPONDING AUTHOR), LUDONG UNIV, SCH CHEM \& MAT SCI, YANTAI 264025, PEOPLES R CHINA	10.1016/j.seppur.2020.117902		1383-5866	SEPARATION AND PURIFICATION TECHNOLOGY	ENGLISH	105					ELSEVIER	ISI	SELECTIVE CAPTURE OF HG(II) AND AG(I) FROM WATER BY SULFUR-FUNCTIONALIZED POLYAMIDOAMINE DENDRIMER/MAGNETIC FE3O4 HYBRID MATERIALS	ARTICLE		257	2021	LUAN LIPING;TANG BENTIAN;LIU YONGFENG;WANG AILI; ZHANG BEIBEI;XU WENLONG;NIU YUZHONG	SEP PURIF TECHNOL	Heavy metal ions pollution in water system has been imposing serious damage to aquatic ecosystem and public health. Efficient and selective capture of targeted metal ion from water is a great challenge and the focus of extensive research. Herein, sulfur-functionalized polyamidoamine (PAMAM) dendrimer/magnetic Fe3O4 hybrid materials were constructed for capturing Hg(II) and Ag(I) from water soluti…	Selective capture of Hg(II) and Ag(I) from water by sulfur-functionalized polyamidoamine dendrimer/magnetic Fe3O4 hybrid materials	Magnetic Fe3O4; Sulfur-functionalized PAMAM dendrimer; Selective; adsorption; Hg(II); Ag(I)	none	LUDONG UNIV;LUDONG UNIV	LUDONG UNIV		LUAN L, 2021, SEP PURIF TECHNOL	LUAN L, 2021, SEP PURIF TECHNOL	RADARWEG 29, 1043 NX AMSTERDAM, NETHERLANDS	LUDONG UNIVERSITY	117902	NIUYUZHONG@LDU.EDU.CN		2025-11-07	OZ9RY	1873-3794			NATIONAL NATURAL SCIENCE FOUNDATION OF CHINA [21307053]; NATURAL SCIENCE FOUNDATION OF SHANDONG PROVINCE [ZR2018MB039]	THE WORK IS FINANCIALLY SUPPORT BY NATIONAL NATURAL SCIENCE FOUNDATION OF CHINA (21307053), NATURAL SCIENCE FOUNDATION OF SHANDONG PROVINCE (ZR2018MB039).	FEB 15
ELWAKEEL K;GUIBAL E	HG(II) SORPTION; MAGNETIC SORBENT; DIETHYLENETRIAMINE-GRAFTED GMA; UPTAKE KINETICS; SORPTION ISOTHERMS; THERMODYNAMICS; DESORPTION; AQUEOUS-SOLUTIONS; POLY(GLYCIDYL METHACRYLATE); ADSORPTION; CHARACTERISTICS; CONTAMINATED WATER; HG(II) ADSORPTION; UPTAKE BEHAVIOR; SILICA-GEL; REMOVAL; CHITOSAN; ADSORBENT	HG(II) SORPTION; MAGNETIC SORBENT; DIETHYLENETRIAMINE-GRAFTED GMA; UPTAKE KINETICS; SORPTION ISOTHERMS; THERMODYNAMICS; DESORPTION	AQUEOUS-SOLUTIONS; POLY(GLYCIDYL METHACRYLATE); ADSORPTION; CHARACTERISTICS; CONTAMINATED WATER; HG(II) ADSORPTION; UPTAKE BEHAVIOR; SILICA-GEL; REMOVAL; CHITOSAN; ADSORBENT	GUIBAL, E (CORRESPONDING AUTHOR), ECOLE MINES ALES, C2MA, 6 AVE CLAVIERES, F-30319 ALES, FRANCE.; ELWAKEEL, KHALID Z., JEDDAH UNIV, DEPT CHEM, FAC SCI, JEDDAH, SAUDI ARABIA.; ELWAKEEL, KHALID Z., PORT SAID UNIV, DEPT ENVIRONM SCI, FAC SCI, PORT SAID, EGYPT.; GUIBAL, ERIC, ECOLE MINES ALES, C2MA, 6 AVE CLAVIERES, F-30319 ALES, FRANCE.	J. ENVIRON. CHEM. ENG.	A COMPOSITE SORBENT (MGMA) WAS SYNTHESIZED BY COATING A MAGNETITE CORE WITH GLYCIDYL METHACRYLATE-BASED POLYMER, FURTHER GRAFTED WITH DIETHYLENETRIAMINE (DETA). THE ABSENCE OF COERCIVITY AND REMANENCE IN VSM ANALYSIS CONFIRMS THAT THE MATERIAL HAS SUPER PARAMAGNETIC PROPERTIES THAT MAKE IT READILY SEPARABLE FROM THE LIQUID PHASE APPLYING EXTERNAL MAGNETIC FIELD. THE SORBENT (MGMA-DETA) WAS TESTED…		GUIBAL, E (CORRESPONDING AUTHOR), ECOLE MINES ALES, C2MA, 6 AVE CLAVIERES, F-30319 ALES, FRANCE	10.1016/j.jece.2016.08.001		2213-2929	JOURNAL OF ENVIRONMENTAL CHEMICAL ENGINEERING	ENGLISH	37	3	3632-3645			ELSEVIER SCI LTD	ISI	POTENTIAL USE OF MAGNETIC GLYCIDYL METHACRYLATE RESIN AS A MERCURY SORBENT: FROM BASIC STUDY TO THE APPLICATION TO WASTEWATER TREATMENT	ARTICLE		4	2016	ELWAKEEL KHALID Z;GUIBAL ERIC	J ENVIRON CHEM ENG	A composite sorbent (MGMA) was synthesized by coating a magnetite core with glycidyl methacrylate-based polymer, further grafted with diethylenetriamine (DETA). The absence of coercivity and remanence in VSM analysis confirms that the material has super paramagnetic properties that make it readily separable from the liquid phase applying external magnetic field. The sorbent (MGMA-DETA) was tested…	Potential use of magnetic glycidyl methacrylate resin as a mercury sorbent: From basic study to the application to wastewater treatment	Hg(II) sorption; Magnetic sorbent; Diethylenetriamine-grafted GMA; Uptake kinetics; Sorption isotherms; Thermodynamics; Desorption	none	ECOLE MINES ALES;JEDDAH UNIV;PORT SAID UNIV;ECOLE MINES ALES	ECOLE MINES ALES		ELWAKEEL K, 2016, J ENVIRON CHEM ENG	ELWAKEEL K, 2016, J ENVIRON CHEM ENG	THE BOULEVARD, LANGFORD LANE, KIDLINGTON, OXFORD OX5 1GB, OXON, ENGLAND	UNIVERSITY OF JEDDAH; EGYPTIAN KNOWLEDGE BANK (EKB); PORT SAID UNIVERSITY; IMT - INSTITUT MINES-TELECOM; IMT MINES ALES		KHALID\_ELWAKEEL@SCI.PSU.EDU.EG ERIC.GUIBAL@MINES-ALES.FR		2025-11-07	EH3UV	2213-3437			FRENCH GOVERNMENT THROUGH FRENCH EMBASSY IN EGYPT (INSTITUT FRANCAIS D'EGYPTE)	THIS STUDY WAS SUPPORTED BY THE FRENCH GOVERNMENT THROUGH A FELLOWSHIP GRANTED FROM THE FRENCH EMBASSY IN EGYPT (INSTITUT FRANCAIS D'EGYPTE). THE AUTHORS WOULD LIKE TO THANK THIERRY VINCENT, ANDRE BRUN AND JEAN-MARIE TAULEMESSE FOR THEIR TECHNICAL AND SCIENTIFIC CONTRIBUTIONS TO THIS WORK.	SEP
WANG Z;ZHANG J;WEN T;LIU X;WANG ;YIFEI Y;YANG H;SUN J;FENG J;DONG ;SHUYING S;SUN J	MAGNETIC MOS2/FE3O4; PB(II) REMOVAL; HG(II) REMOVAL; REALISTIC; WASTEWATER; CONTAMINATED SOIL; HIGH-EFFICIENCY REMOVAL; HEAVY-METAL IONS; MOLYBDENUM-DISULFIDE; AQUEOUS-SOLUTION; ADSORPTION BEHAVIOR; NANOSHEETS; INDUSTRIAL; COMPOSITE; ADSORBENT; GRAPHENE	MAGNETIC MOS2/FE3O4; PB(II) REMOVAL; HG(II) REMOVAL; REALISTIC; WASTEWATER; CONTAMINATED SOIL	HIGH-EFFICIENCY REMOVAL; HEAVY-METAL IONS; MOLYBDENUM-DISULFIDE; AQUEOUS-SOLUTION; ADSORPTION BEHAVIOR; NANOSHEETS; INDUSTRIAL; COMPOSITE; ADSORBENT; GRAPHENE	DONG, SY; SUN, JH (CORRESPONDING AUTHOR), HENAN NORMAL UNIV, HENAN KEY LAB ENVIRONM POLLUT CONTROL, SCH ENVIRONM, MOE KEY LAB YELLOW RIVER \& HUAI RIVER WATER ENVIR, XINXIANG 453007, HENAN, PEOPLES R CHINA.; WANG, YF (CORRESPONDING AUTHOR), BEIJING UNIV TECHNOL, KEY LAB BEIJING WATER QUAL SCI \& WATER ENVIRONM R, NATL ENGN LAB ADV MUNICIPAL WASTEWATER TREATMENT, BEIJING 100124, PEOPLES R CHINA.; …	SCI. TOTAL ENVIRON.	THE EFFICIENT ENRICHMENT AND REMEDIATION OF HEAVY METALS FROM REALISTIC WASTEWATER AND CONTAMINATED SOIL CONTAINING LARGE EXCESS OF COMPETITIVE IONS REMAINS A DAUNTING CHALLENGE BY FAR. IN THE PRESENT STUDY, FLOWER-LIKE MOLYBDENUM DISULFIDE DECORATED WITH IRON OXIDE NANOPARTICLES (MOS2/FE3O4) IS DESIGNED VIA A TWO-STEP HYDROTHERMAL METHOD AND MAINLY APPLIED IN THE REMOVAL OF HG(II) AND PB(II) ION…		DONG, SY; SUN, JH (CORRESPONDING AUTHOR), HENAN NORMAL UNIV, HENAN KEY LAB ENVIRONM POLLUT CONTROL, SCH ENVIRONM, MOE KEY LAB YELLOW RIVER \& HUAI RIVER WATER ENVIR, XINXIANG 453007, HENAN, PEOPLES R CHINA	10.1016/j.scitotenv.2019.134341		0048-9697	SCIENCE OF THE TOTAL ENVIRONMENT	ENGLISH	114					ELSEVIER	ISI	HIGHLY EFFECTIVE REMEDIATION OF PB(II) AND HG(II) CONTAMINATED WASTEWATER AND SOIL BY FLOWER-LIKE MAGNETIC MOS2 NANOHYBRID	ARTICLE		699	2020	WANG ZONGWU;ZHANG JING;WEN TAO;LIU XIAOLAN;WANG; YIFEI;YANG HUIYING;SUN JINGYU;FENG JINGLAN;DONG; SHUYING;SUN JIANHUI	SCI TOTAL ENVIRON	The efficient enrichment and remediation of heavy metals from realistic wastewater and contaminated soil containing large excess of competitive ions remains a daunting challenge by far. In the present study, flower-like molybdenum disulfide decorated with iron oxide nanoparticles (MoS2/Fe3O4) is designed via a two-step hydrothermal method and mainly applied in the removal of Hg(II) and Pb(II) ion…	Highly effective remediation of Pb(II) and Hg(II) contaminated wastewater and soil by flower-like magnetic MoS2 nanohybrid	Magnetic MoS2/Fe3O4; Pb(II) removal; Hg(II) removal; Realistic; wastewater; Contaminated soil	none	HENAN NORMAL UNIV;BEIJING UNIV TECHNOL;HENAN NORMAL UNIV;COLL ENVIRONM ENGN;NORTH CHINA ELECT POWER UNIV;BEIJING UNIV TECHNOL;SOOCHOW UNIV	NOTREPORTED;HENAN NORMAL UNIV		WANG Z, 2020, SCI TOTAL ENVIRON	WANG Z, 2020, SCI TOTAL ENVIRON	RADARWEG 29, 1043 NX AMSTERDAM, NETHERLANDS	HENAN NORMAL UNIVERSITY; YELLOW RIVER CONSERVANCY TECHNICAL UNIVERSITY; NORTH CHINA ELECTRIC POWER UNIVERSITY; BEIJING UNIVERSITY OF TECHNOLOGY; SOOCHOW UNIVERSITY - CHINA	134341	WANGYIFEI@BJUT.EDU.CN DONGSY@HTU.EDU.CN SUNJH@HTU.EDU.CN		2025-11-07	JS8WY	1879-1026			NSFC [21677047, U1604137, 51808199]; CHINA POSTDOCTORAL SCIENCE FOUNDATION [2018M630825]; PLAN FOR UNIVERSITY SCIENTIFIC INNOVATION TALENT OF HENAN PROVINCE [19HASTIT046]	THIS WORK WAS SUPPORTED BY THE NSFC (GRANTS NO. 21677047, U1604137 AND 51808199), THE CHINA POSTDOCTORAL SCIENCE FOUNDATION (GRANT NO. 2018M630825) AND PLAN FOR UNIVERSITY SCIENTIFIC INNOVATION TALENT OF HENAN PROVINCE (19HASTIT046).	JAN 10
MAHMOUD M;NABIL G;ZAKI M;SALEH ;MOHAMED M M	STEEL INDUSTRY; STARCH; HEAVY METALS REMOVAL; HEMATITE NANOPARTICLES; MAGNETIC NANOPARTICLES; EFFICIENT REMOVAL; HEAVY-METALS; ADSORBENT; EXTRACTION; CADMIUM; WASTE; LEAD; DEGRADATION	STEEL INDUSTRY; STARCH; HEAVY METALS REMOVAL	HEMATITE NANOPARTICLES; MAGNETIC NANOPARTICLES; EFFICIENT REMOVAL; HEAVY-METALS; ADSORBENT; EXTRACTION; CADMIUM; WASTE; LEAD; DEGRADATION	MAHMOUD, ME (CORRESPONDING AUTHOR), ALEXANDRIA UNIV, CHEM DEPT, FAC SCI, POB 426, ALEXANDRIA 21321, EGYPT.; MAHMOUD, MOHAMED E.; NABIL, GEHAN M., ALEXANDRIA UNIV, CHEM DEPT, FAC SCI, POB 426, ALEXANDRIA 21321, EGYPT.; ZAKI, MOHAMED M.; SALEH, MOHAMED M., EZZ STEEL, EZDK, EL DEKHEILA PLANT, POB 21537, ALEXANDRIA, EGYPT.	INT. J. BIOL. MACROMOL.	HEAVY METAL REMOVAL BY WASTE MATERIAL FROM DIFFERENT INDUSTRY HAS BECOME ONE OF THE MAIN ECONOMICAL APPROACHES FOR ZERO WASTE INDUSTRIAL ACTIVITY. THEREFORE, IRON OXIDE FINE WASTE BY-PRODUCT FROM STEEL INDUSTRY WAS CONVERTED INTO NANOPARTICULATES (FE2O3 NPS) AND FURTHER CROSSLINKED WITH STARCH AS A GOOD STABILIZER AND BIODEGRADABLE POLYMER USING FORMALDEHYDE TO FORM FE2O3 NPS-STARCH NANOCOMPOSITE…		MAHMOUD, ME (CORRESPONDING AUTHOR), ALEXANDRIA UNIV, CHEM DEPT, FAC SCI, POB 426, ALEXANDRIA 21321, EGYPT	10.1016/j.ijbiomac.2019.06.170		0141-8130	INTERNATIONAL JOURNAL OF BIOLOGICAL MACROMOLECULES	ENGLISH	63		455-468			ELSEVIER	ISI	STARCH FUNCTIONALIZATION OF IRON OXIDE BY-PRODUCT FROM STEEL INDUSTRY AS A SUSTAINABLE LOW COST NANOCOMPOSITE FOR REMOVAL OF DIVALENT TOXIC METAL IONS FROM WATER	ARTICLE		137	2019	MAHMOUD MOHAMED E;NABIL GEHAN M;ZAKI MOHAMED M;SALEH; MOHAMED M	INT J BIOL MACROMOL	Heavy metal removal by waste material from different industry has become one of the main economical approaches for zero waste industrial activity. Therefore, iron oxide fine waste by-product from steel industry was converted into nanoparticulates (Fe2O3 NPs) and further crosslinked with starch as a good stabilizer and biodegradable polymer using formaldehyde to form Fe2O3 NPs-Starch nanocomposite…	Starch functionalization of iron oxide by-product from steel industry as a sustainable low cost nanocomposite for removal of divalent toxic metal ions from water	Steel industry; Starch; Heavy metals removal	none	ALEXANDRIA UNIV;ALEXANDRIA UNIV	ALEXANDRIA UNIV		MAHMOUD M, 2019, INT J BIOL MACROMOL	MAHMOUD M, 2019, INT J BIOL MACROMOL	RADARWEG 29, 1043 NX AMSTERDAM, NETHERLANDS	EGYPTIAN KNOWLEDGE BANK (EKB); ALEXANDRIA UNIVERSITY		MEMAHMOUD10@ALEXU.EDU.EG		2025-11-07	IW0HX	1879-0003					SEP 15
LIU J;ZHAO Z;XU R;WANG Y;WANG ;XIAOCHUN X;TAN F	SH-FUNCTIONALIZATION; ADSORPTION; MERCURY ION; HEAVY METAL REMOVAL; TITANIUM CARBIDE; ADSORPTION BEHAVIOR; HIGHLY EFFICIENT; MERCURY; REMOVAL; HG(II); FE3O4-AT-SIO2; NANOSHEETS; SORBENT	SH-FUNCTIONALIZATION; ADSORPTION; MERCURY ION; HEAVY METAL REMOVAL	TITANIUM CARBIDE; ADSORPTION BEHAVIOR; HIGHLY EFFICIENT; MERCURY; REMOVAL; HG(II); FE3O4-AT-SIO2; NANOSHEETS; SORBENT	TAN, F (CORRESPONDING AUTHOR), DALIAN UNIV TECHNOL, SCH ENVIRONM SCI \& TECHNOL, KEY LAB IND ECOL \& ENVIRONM ENGN MOE, DALIAN 116024, PEOPLES R CHINA.; LIU, JINGHUA; ZHAO, ZHANYI; XU, RULIN; WANG, YAN; TAN, FENG, DALIAN UNIV TECHNOL, SCH ENVIRONM SCI \& TECHNOL, KEY LAB IND ECOL \& ENVIRONM ENGN MOE, DALIAN 116024, PEOPLES R CHINA.; WANG, XIAOCHUN, ANSHAN NORMAL UNIV, COLL CHEM \& LIFE SCI, ANSH…	J. HAZARD. MATER.	THIS STUDY DESCRIBES AN ADSORPTION METHOD FOR THE REMOVAL OF HG2+ FROM AQUATIC ENVIRONMENTS USING SULFHYDRYLFUNCTIONALIZED TI3C2TX (SH-TI3C2TX). SH-TI3C2TX MATERIALS WERE SYNTHESIZED THROUGH COVALENT INTERACTIONS BETWEEN DITHIOTHREITOL AND TWO-DIMENSIONAL TI3C2TX. THE INSERTION OF -SH GROUPS INCREASED THE INTERLAYER SPACING OF TI3C2TX, RESULTING IN A 3-FOLD INCREASE IN THE SPECIFIC SURFACE AREA O…		TAN, F (CORRESPONDING AUTHOR), DALIAN UNIV TECHNOL, SCH ENVIRONM SCI \& TECHNOL, KEY LAB IND ECOL \& ENVIRONM ENGN MOE, DALIAN 116024, PEOPLES R CHINA	10.1016/j.jhazmat.2024.135205		0304-3894	JOURNAL OF HAZARDOUS MATERIALS	ENGLISH	3					ELSEVIER	ISI	SULFHYDRYL FUNCTIONALIZED TWO-DIMENSIONAL TI3C2TX MXENE FOR EFFICIENT REMOVAL OF HG2+ IN WATER SAMPLES	ARTICLE		476	2024	LIU JINGHUA;ZHAO ZHANYI;XU RULIN;WANG YAN;WANG; XIAOCHUN;TAN FENG	J HAZARD MATER	This study describes an adsorption method for the removal of Hg2+ from aquatic environments using sulfhydrylfunctionalized Ti3C2Tx (SH-Ti3C2Tx). SH-Ti3C2Tx materials were synthesized through covalent interactions between dithiothreitol and two-dimensional Ti3C2Tx. The insertion of -SH groups increased the interlayer spacing of Ti3C2Tx, resulting in a 3-fold increase in the specific surface area o…	Sulfhydryl functionalized two-dimensional Ti3C2Tx MXene for efficient removal of Hg2+ in water samples	SH-functionalization; Adsorption; Mercury ion; Heavy metal removal	none	DALIAN UNIV TECHNOL;DALIAN UNIV TECHNOL;ANSHAN NORMAL UNIV	DALIAN UNIV TECHNOL		LIU J, 2024, J HAZARD MATER	LIU J, 2024, J HAZARD MATER	RADARWEG 29, 1043 NX AMSTERDAM, NETHERLANDS	DALIAN UNIVERSITY OF TECHNOLOGY; ANSHAN NORMAL UNIVERSITY	135205	TANF@DLUT.EDU.CN		2025-11-07	YY5P4	1873-3336	JUL 2024		NATIONAL NATURAL SCIENCE FOUNDATION OF CHINA [22276021]; DALIAN POCT LABORATORY	THIS WORK WAS SUPPORTED BY THE NATIONAL NATURAL SCIENCE FOUNDATION OF CHINA (22276021) AND THE DALIAN POCT LABORATORY. THE AUTHORS ACKNOWLEDGE THE ASSISTANCE OF DUT INSTRUMENTAL ANALYSIS CENTER.	SEP 5
KULAL P;BADALAMOOLE V	KAPPA-CARRAGEENAN; POLY(N-HYDROXYETHYLACRYLAMIDE); MAGNETITE; ADSORPTION; CATIONIC DYES; METAL IONS; LOW-COST ADSORBENTS; AQUEOUS-SOLUTION; ADSORPTION PROPERTIES; SURFACE; MODIFICATION; METHYLENE-BLUE; RHODAMINE 6G; CATIONIC DYE; REMOVAL; HYDROGELS; WASTE	KAPPA-CARRAGEENAN; POLY(N-HYDROXYETHYLACRYLAMIDE); MAGNETITE; ADSORPTION; CATIONIC DYES; METAL IONS	LOW-COST ADSORBENTS; AQUEOUS-SOLUTION; ADSORPTION PROPERTIES; SURFACE; MODIFICATION; METHYLENE-BLUE; RHODAMINE 6G; CATIONIC DYE; REMOVAL; HYDROGELS; WASTE	BADALAMOOLE, V (CORRESPONDING AUTHOR), MANGALORE UNIV, DEPT POSTGRAD STUDIES \& RES CHEM, MANGALAGANGOTHRI 574199, KARNATAKA, INDIA.; KULAL, PRAJWAL; BADALAMOOLE, VISHALAKSHI, MANGALORE UNIV, DEPT POSTGRAD STUDIES \& RES CHEM, MANGALAGANGOTHRI 574199, KARNATAKA, INDIA.	INT. J. BIOL. MACROMOL.	A NOVEL POLYSACCHARIDE BASED HYDROGEL; KAPPA-CARRAGEENAN GRAFTED WITH N-HYDROXYETHYLACRYLAMIDE (KAPPA C-GPHEAA) WAS SYNTHESIZED VIA MICROWAVE ASSISTED FREE RADICAL POLYMERIZATION PROCESS. A HYBRID NANOCOMPOSITE HAS ALSO BEEN MADE BY INCORPORATION OF FE3O4 NANOPARTICLES INTO THE KAPPA C-G-PHEAA NETWORK. THE MATERIALS WERE CHARACTERIZED BY FTIR, TGA, XRD, SEM, BET AND VSM TECHNIQUES. THE NANOCOMPOS…		BADALAMOOLE, V (CORRESPONDING AUTHOR), MANGALORE UNIV, DEPT POSTGRAD STUDIES \& RES CHEM, MANGALAGANGOTHRI 574199, KARNATAKA, INDIA	10.1016/j.ijbiomac.2020.09.202		0141-8130	INTERNATIONAL JOURNAL OF BIOLOGICAL MACROMOLECULES	ENGLISH	53		542-553			ELSEVIER	ISI	HYBRID NANOCOMPOSITE OF KAPPA-CARRAGEENAN AND MAGNETITE AS ADSORBENT MATERIAL FOR WATER PURIFICATION	ARTICLE		165	2020	KULAL PRAJWAL;BADALAMOOLE VISHALAKSHI	INT J BIOL MACROMOL	A novel polysaccharide based hydrogel; kappa-carrageenan grafted with N-hydroxyethylacrylamide (kappa C-gPHEAA) was synthesized via microwave assisted free radical polymerization process. A hybrid nanocomposite has also been made by incorporation of Fe3O4 nanoparticles into the kappa C-g-PHEAA network. The materials were characterized by FTIR, TGA, XRD, SEM, BET and VSM techniques. The nanocompos…	Hybrid nanocomposite of kappa-carrageenan and magnetite as adsorbent material for water purification	kappa-Carrageenan; Poly(N-hydroxyethylacrylamide); Magnetite; Adsorption; Cationic dyes; Metal ions	none	MANGALORE UNIV;MANGALORE UNIV	MANGALORE UNIV		KULAL P, 2020, INT J BIOL MACROMOL	KULAL P, 2020, INT J BIOL MACROMOL-a	RADARWEG 29, 1043 NX AMSTERDAM, NETHERLANDS	MANGALORE UNIVERSITY		VISHALAKSHI2009@YAHOO.COM		2025-11-07	PI0CG	1879-0003					DEC 15
ZAREI S;RAANAEI H;NIAD M	ADSORBENTS; MAGNETIC NANOCOMPOSITE; NANOCELLULOSE EXTRACTION; VIBRATING; SAMPLE MAGNETOMETER; X-RAY DIFFRACTION; RESPONSE-SURFACE METHODOLOGY; OPTIMIZATION; ADSORPTION; BIOSORPTION; FABRICATION; PARAMETERS; CELLULOSE; HG(II); RSM	ADSORBENTS; MAGNETIC NANOCOMPOSITE; NANOCELLULOSE EXTRACTION; VIBRATING; SAMPLE MAGNETOMETER; X-RAY DIFFRACTION	RESPONSE-SURFACE METHODOLOGY; OPTIMIZATION; ADSORPTION; BIOSORPTION; FABRICATION; PARAMETERS; CELLULOSE; HG(II); RSM	NIAD, M (CORRESPONDING AUTHOR), PERSIAN GULF UNIV, FAC NANO \& BIO SCI \& TECHNOL, CHEM DEPT, BUSHEHR 75169, IRAN.; ZAREI, SAEID; RAANAEI, HOSSEIN, PERSIAN GULF UNIV, FAC NANO \& BIO SCI \& TECHNOL, PHYS DEPT, BUSHEHR 75169, IRAN.; NIAD, MAHMOOD, PERSIAN GULF UNIV, FAC NANO \& BIO SCI \& TECHNOL, CHEM DEPT, BUSHEHR 75169, IRAN.	INORG. CHEM. COMMUN.	THE CYSTOSERIA MYRICAAS ALGAE COLLECTED FROM PERSIAN GULF WAS DRIED AND APPLIED AS A SUBSTRATE FOR NANOCELLULOSE EXTRACTION. THE FE3O4, FE3O4@SIO2, FE3O4@SIO2-NH2-GO, AND FE3O4@SIO2-NH2-GO-NC ARE SYNTHESIZED. THE SYNTHESIZED COMPOUNDS ARE CHARACTERIZED BY X-RAY DIFFRACTION (XRD), BRUNAUER-EMMETT-TELLER (BET) METHOD AND VIBRATING SAMPLE MAGNETOMETER (VSM). ADDITIONAL CHARACTERIZATION, INCLUDING SC…		NIAD, M (CORRESPONDING AUTHOR), PERSIAN GULF UNIV, FAC NANO \& BIO SCI \& TECHNOL, CHEM DEPT, BUSHEHR 75169, IRAN	10.1016/j.inoche.2023.110665		1387-7003	INORGANIC CHEMISTRY COMMUNICATIONS	ENGLISH	3					ELSEVIER	ISI	INVESTIGATION OF MERCURY REMOVAL BY FE3O4@SIO2-NH2-GO-NC AS MAGNETIC NANOCOMPOSITE	ARTICLE		152	2023	ZAREI SAEID;RAANAEI HOSSEIN;NIAD MAHMOOD	INORG CHEM COMMUN	The Cystoseria myricaas algae collected from Persian Gulf was dried and applied as a substrate for nanocellulose extraction. The Fe3O4, Fe3O4@SiO2, Fe3O4@SiO2-NH2-GO, and Fe3O4@SiO2-NH2-GO-NC are synthesized. The synthesized compounds are characterized by x-ray diffraction (XRD), Brunauer-Emmett-Teller (BET) method and vibrating sample magnetometer (VSM). Additional characterization, including sc…	Investigation of mercury removal by Fe3O4@SiO2-NH2-GO-NC as magnetic nanocomposite	Adsorbents; Magnetic nanocomposite; Nanocellulose extraction; Vibrating; sample magnetometer; X-ray diffraction	none	PERSIAN GULF UNIV;PERSIAN GULF UNIV;PERSIAN GULF UNIV	PERSIAN GULF UNIV		ZAREI S, 2023, INORG CHEM COMMUN	ZAREI S, 2023, INORG CHEM COMMUN	RADARWEG 29, 1043 NX AMSTERDAM, NETHERLANDS	PERSIAN GULF UNIVERSITY; PERSIAN GULF UNIVERSITY	110665	MANIAD@PGU.AC.IR		2025-11-07	F4PO8	1879-0259	APR 2023		IRAN'S NATIONAL SCIENCE FOUNDATION (INSF) [99012940]; PERSIAN GULF UNIVERSITY	THE AUTHORS ARE THANKFUL TO IRAN'S NATIONAL SCIENCE FOUNDATION (INSF) (GRANT NO: 99012940) AND RESEARCH COUNCIL OF PERSIAN GULF UNIVERSITY FOR FINANCIAL SUPPORT	JUN
SOBHANARDAKANI S;ZANDIPAK R	HEAVY METAL IONS; TIO2/SIO2/FE3O4 NANOPARTICLES; ADSORPTION EFFICIENCY; ISOTHERM; HEAVY-METAL REMOVAL; AQUEOUS-SOLUTION; SOLID/SOLUTION INTERFACE; RICE; HUSK; LOW-COST; ADSORPTION; FE3O4-AT-SIO2; KINETICS; OXIDE; MICROSPHERES	HEAVY METAL IONS; TIO2/SIO2/FE3O4 NANOPARTICLES; ADSORPTION EFFICIENCY; ISOTHERM	HEAVY-METAL REMOVAL; AQUEOUS-SOLUTION; SOLID/SOLUTION INTERFACE; RICE; HUSK; LOW-COST; ADSORPTION; FE3O4-AT-SIO2; KINETICS; OXIDE; MICROSPHERES	SOBHANARDAKANI, S (CORRESPONDING AUTHOR), ISLAMIC AZAD UNIV, HAMEDAN BRANCH, DEPT ENVIRONM, COLL BASIC SCI, HAMADAN, IRAN.; SOBHANARDAKANI, SOHEIL, ISLAMIC AZAD UNIV, HAMEDAN BRANCH, DEPT ENVIRONM, COLL BASIC SCI, HAMADAN, IRAN.; ZANDIPAK, RAZIYEH, ISLAMIC AZAD UNIV, HAMEDAN BRANCH, YOUNG RESEARCHERS \& ELITE CLUB, HAMADAN, IRAN.	CLEAN TECHNOL. ENVIRON. POLICY	IN THE CURRENT STUDY, SIO2/FE3O4 CORE-SHELL NANOPARTICLES FUNCTIONALIZED WITH TIO2, USING A SIMPLE METHOD AND APPLICATION FOR REMOVAL OF CD(II), HG(II) AND NI(II) IONS FROM AQUEOUS SOLUTION. THE STRUCTURE OF THE RESULTING PRODUCT WAS CONFIRMED BY X-RAY DIFFRACTION SPECTROMETRY, TRANSMISSION ELECTRON MICROSCOPY (TEM), PH(PZC) AND BRUNAUER, EMMETT AND TELLER METHODS. THE AVERAGE DIAMETER OF TIO2/SI…		SOBHANARDAKANI, S (CORRESPONDING AUTHOR), ISLAMIC AZAD UNIV, HAMEDAN BRANCH, DEPT ENVIRONM, COLL BASIC SCI, HAMADAN, IRAN	10.1007/s10098-017-1374-5		1618-954X	CLEAN TECHNOLOGIES AND ENVIRONMENTAL POLICY	ENGLISH	88	7	1913-1925			SPRINGER	ISI	SYNTHESIS AND APPLICATION OF TIO2/SIO2/FE3O4 NANOPARTICLES AS NOVEL ADSORBENT FOR REMOVAL OF CD(II), HG(II) AND NI(II) IONS FROM WATER SAMPLES	ARTICLE		19	2017	SOBHANARDAKANI SOHEIL;ZANDIPAK RAZIYEH	CLEAN TECHNOL ENVIRON POLICY	In the current study, SiO2/Fe3O4 core-shell nanoparticles functionalized with TiO2, using a simple method and application for removal of Cd(II), Hg(II) and Ni(II) ions from aqueous solution. The structure of the resulting product was confirmed by X-ray diffraction spectrometry, transmission electron microscopy (TEM), pH(pzc) and Brunauer, Emmett and Teller methods. The average diameter of TiO2/Si…	Synthesis and application of TiO2/SiO2/Fe3O4 nanoparticles as novel adsorbent for removal of Cd(II), Hg(II) and Ni(II) ions from water samples	Heavy metal ions; TiO2/SiO2/Fe3O4 nanoparticles; Adsorption efficiency; Isotherm	none	ISLAMIC AZAD UNIV;ISLAMIC AZAD UNIV;ISLAMIC AZAD UNIV	ISLAMIC AZAD UNIV		SOBHANARDAKANI S, 2017, CLEAN TECHNOL ENVIRON POLICY	SOBHANARDAKANI S, 2017, CLEAN TECHNOL ENVIRON POLICY	233 SPRING ST, NEW YORK, NY 10013 USA	ISLAMIC AZAD UNIVERSITY; ISLAMIC AZAD UNIVERSITY		S\_SOBHAN@IAUH.AC.IR		2025-11-07	FD0LN	1618-9558			HAMEDAN BRANCH, ISLAMIC AZAD UNIVERSITY [34200]	FUNDING WAS PROVIDED BY HAMEDAN BRANCH, ISLAMIC AZAD UNIVERSITY (GRANT NO. 34200).	SEP
ZOU C;LIANG J;JIANG W;GUAN Y;ZHANG Y	MERCURY ADSORPTION; NANOPARTICLES; MECHANISM; KINETICS; PB(II); IONS; EQUILIBRIUM; ADSORBENT; CU(II); PB2+		MERCURY ADSORPTION; NANOPARTICLES; MECHANISM; KINETICS; PB(II); IONS; EQUILIBRIUM; ADSORBENT; CU(II); PB2+	LIANG, JY (CORRESPONDING AUTHOR), SHENYANG UNIV TECHNOL, SCH SCI, SHENYANG 110870, LIAONING, PEOPLES R CHINA.; ZOU, CHENGLONG; LIANG, JIYAN; JIANG, WEI; GUAN, YINYAN; ZHANG, YICHEN, SHENYANG UNIV TECHNOL, SCH SCI, SHENYANG 110870, LIAONING, PEOPLES R CHINA.	RSC ADV.	BENTONITE IS A POROUS CLAY MATERIAL THAT SHOWS GOOD PERFORMANCE FOR ADSORBING HEAVY METALS AND OTHER POLLUTANTS FOR WASTEWATER REMEDIATION. HOWEVER, IT IS VERY DIFFICULT TO SEPARATE THE BENTONITE FROM WATER AFTER ADSORPTION AS IT FORMS A STABLE SUSPENSION. IN THIS PAPER, WE PREPARED MAGNETIC BENTONITE (M-B) BY LOADING FE3O4 PARTICLES ONTO ALUMINUM-PILLARED BENTONITE (AL-B) IN ORDER TO FACILITATE …		LIANG, JY (CORRESPONDING AUTHOR), SHENYANG UNIV TECHNOL, SCH SCI, SHENYANG 110870, LIAONING, PEOPLES R CHINA	10.1039/c8ra05247f			RSC ADVANCES	ENGLISH	49	48	27587-27595			ROYAL SOC CHEMISTRY	ISI	ADSORPTION BEHAVIOR OF MAGNETIC BENTONITE FOR REMOVING HG(II) FROM AQUEOUS SOLUTIONS	ARTICLE		8	2018	ZOU CHENGLONG;LIANG JIYAN;JIANG WEI;GUAN YINYAN; ZHANG YICHEN	RSC ADV	Bentonite is a porous clay material that shows good performance for adsorbing heavy metals and other pollutants for wastewater remediation. However, it is very difficult to separate the bentonite from water after adsorption as it forms a stable suspension. In this paper, we prepared magnetic bentonite (M-B) by loading Fe3O4 particles onto aluminum-pillared bentonite (Al-B) in order to facilitate …	Adsorption behavior of magnetic bentonite for removing Hg(II) from aqueous solutions		none	SHENYANG UNIV TECHNOL;SHENYANG UNIV TECHNOL	SHENYANG UNIV TECHNOL		ZOU C, 2018, RSC ADV	ZOU C, 2018, RSC ADV	THOMAS GRAHAM HOUSE, SCIENCE PARK, MILTON RD, CAMBRIDGE CB4 0WF, CAMBS, ENGLAND	SHENYANG UNIVERSITY OF TECHNOLOGY		LIANGJIY2017@126.COM		2025-11-07	GV0KB	2046-2069			CHINA ENVIRONMENTAL PROTECTION FOUNDATION, GEPING GREEN ACTION, LIAONING ENVIRONMENTAL RESEARCH AND EDUCATION FUND ``123 PROJECT'' [CEPF2014-123-1-6]; ``LIAONING BAIQIANWAN TALENTS PROGRAM''	THIS WORK WAS FINANCIALLY SUPPORTED BY THE CHINA ENVIRONMENTAL PROTECTION FOUNDATION, GEPING GREEN ACTION, LIAONING ENVIRONMENTAL RESEARCH AND EDUCATION FUND ``123 PROJECT'' (GRANT NO. CEPF2014-123-1-6). AND, THIS WORK WAS SPONSORED BY ``LIAONING BAIQIANWAN TALENTS PROGRAM''.
ABDOLLAHI N;RAZAVI S;MORSALI A;HU ;MAO-LIN M	MOF-BASED COMPOSITE; HG(II) REMOVAL; PB(II) REMOVAL; UREA; SURFACE-CHARGE MODULATION; METAL-ORGANIC FRAMEWORKS; ZETA-POTENTIAL MEASUREMENTS; EFFICIENT; REMOVAL; ENHANCED REMOVAL; HG2+ REMOVAL; IONS; ADSORPTION; COMPOSITE; STRATEGY; LEAD	MOF-BASED COMPOSITE; HG(II) REMOVAL; PB(II) REMOVAL; UREA; SURFACE-CHARGE MODULATION	METAL-ORGANIC FRAMEWORKS; ZETA-POTENTIAL MEASUREMENTS; EFFICIENT; REMOVAL; ENHANCED REMOVAL; HG2+ REMOVAL; IONS; ADSORPTION; COMPOSITE; STRATEGY; LEAD	MORSALI, A (CORRESPONDING AUTHOR), TARBIAT MODARES UNIV, FAC SCI, DEPT CHEM, POB 14115-4838, TEHRAN, IRAN.; HU, ML (CORRESPONDING AUTHOR), WENZHOU UNIV, COLL CHEM \& MAT ENGN, WENZHOU 325035, PEOPLES R CHINA.; ABDOLLAHI, NASRIN; RAZAVI, SAYED ALI AKBAR; MORSALI, ALI, TARBIAT MODARES UNIV, FAC SCI, DEPT CHEM, POB 14115-4838, TEHRAN, IRAN.; HU, MAO-LIN, WENZHOU UNIV, COLL CHEM \& MAT ENGN, WENZHOU …	J. HAZARD. MATER.	WATER POLLUTION BY HEAVY METAL IONS ESPECIALLY HG(II) AND PB(II) IS ONE OF THE MOST IMPORTANT CONCERNS BECAUSE OF THEIR HARMFUL EFFECTS ON HUMAN HEALTH AND ENVIRONMENT SUSTAINABILITY. HERE, WE DEVELOPED FE3O4@TMU-32 METAL-ORGANIC FRAMEWORK (MOF)-BASED NANOCOMPOSITE BY APPLYING PORE FUNCTIONALIZATION AND SURFACE-CHARGE MODULATION STRATEGIES. BASED ON SYNERGIC EFFECTS OF THESE STRATEGIES, FE3O4@TMU…		MORSALI, A (CORRESPONDING AUTHOR), TARBIAT MODARES UNIV, FAC SCI, DEPT CHEM, POB 14115-4838, TEHRAN, IRAN	10.1016/j.jhazmat.2019.121667		0304-3894	JOURNAL OF HAZARDOUS MATERIALS	ENGLISH	169					ELSEVIER	ISI	HIGH CAPACITY HG(II) AND PB(II) REMOVAL USING MOF-BASED NANOCOMPOSITE: COOPERATIVE EFFECTS OF PORE FUNCTIONALIZATION AND SURFACE-CHARGE MODULATION	ARTICLE		387	2020	ABDOLLAHI NASRIN;RAZAVI SAYED ALI AKBAR;MORSALI ALI;HU; MAO-LIN	J HAZARD MATER	Water pollution by heavy metal ions especially Hg(II) and Pb(II) is one of the most important concerns because of their harmful effects on human health and environment sustainability. Here, we developed Fe3O4@TMU-32 metal-organic framework (MOF)-based nanocomposite by applying pore functionalization and surface-charge modulation strategies. Based on synergic effects of these strategies, Fe3O4@TMU…	High capacity Hg(II) and Pb(II) removal using MOF-based nanocomposite: Cooperative effects of pore functionalization and surface-charge modulation	MOF-based composite; Hg(II) removal; Pb(II) removal; Urea; Surface-charge modulation	none	TARBIAT MODARES UNIV;WENZHOU UNIV;TARBIAT MODARES UNIV;WENZHOU UNIV	TARBIAT MODARES UNIV		ABDOLLAHI N, 2020, J HAZARD MATER	ABDOLLAHI N, 2020, J HAZARD MATER	RADARWEG 29, 1043 NX AMSTERDAM, NETHERLANDS	TARBIAT MODARES UNIVERSITY; WENZHOU UNIVERSITY	121667	MORSALI\_A@MODARES.AC.IR MAOLIN\_HU@YAHOO.COM		2025-11-07	KN3RR	1873-3336			TARBIAT MODARES UNIVERSITY; NATIONAL NATURAL SCIENCE FOUNDATION OF CHINA [21371137, 21571143]	SUPPORT OF THIS INVESTIGATION BY TARBIAT MODARES UNIVERSITY IS GRATEFULLY ACKNOWLEDGED. SUPPORT OF THIS INVESTIGATION BY THE NATIONAL NATURAL SCIENCE FOUNDATION OF CHINA (NOS. 21371137 AND 21571143) AND TARBIAT MODARES UNIVERSITY IS GRATEFULLY ACKNOWLEDGED.	APR 5
LI L;WANG F;LV Y;LIU J;BIAN ;HONGLI H;WANG W;LI Y;SHAO Z	CARBON DOTS; METAL-IONS; FE3O4 NANOPARTICLES; SELECTIVE DETECTION; CHITOSAN; EFFICIENT; MEMBRANE; CHEMOSENSOR; ADSORBENT; COMPOSITE		CARBON DOTS; METAL-IONS; FE3O4 NANOPARTICLES; SELECTIVE DETECTION; CHITOSAN; EFFICIENT; MEMBRANE; CHEMOSENSOR; ADSORBENT; COMPOSITE	WANG, FJ (CORRESPONDING AUTHOR), BEIJING INST TECHNOL, SCH MAT SCI \& ENGN, BEIJING 100081, PEOPLES R CHINA.; WANG, FJ (CORRESPONDING AUTHOR), BEIJING ENGN RES CTR CELLULOSE \& ITS DERIVAT, BEIJING 100081, PEOPLES R CHINA.; LI, LEI; WANG, FEIJUN; LV, YANYAN; LIU, JIANXIN; BIAN, HONGLI; WANG, WENJUN; LI, YONGHONG; SHAO, ZIQIANG, BEIJING INST TECHNOL, SCH MAT SCI \& ENGN, BEIJING 100081, PEOPLES R …	ACS OMEGA	THIS PAPER REPORTS THE CARBON QUANTUM DOTSDOPED MAGNETIC ELECTROSPINNING NANOFIBERS FOR THE SELF-DISPLAY AND REMOVAL OF HG(II) IONS FROM WATER. THE FLUORESCENT CARBON QUANTUM DOTS AND MAGNETIC FE3O4 NANOPARTICLES WERE PRE-PREPARED SUCCESSFULLY, AND THEY APPEARED TO BE HOMOGENEOUSLY DISPERSED IN NANOFIBERS VIA ELECTROSPINNING. DURING THE SORPTION OF HG(II) IONS, THE SIGNIFICANT FLUORESCENCE SIGNAL…		WANG, FJ (CORRESPONDING AUTHOR), BEIJING INST TECHNOL, SCH MAT SCI \& ENGN, BEIJING 100081, PEOPLES R CHINA	10.1021/acsomega.7b01969		2470-1343	ACS OMEGA	ENGLISH	23	4	4220-4230			AMER CHEMICAL SOC	ISI	CQDS-DOPED MAGNETIC ELECTROSPUN NANOFIBERS: FLUORESCENCE SELF-DISPLAY AND ADSORPTION REMOVAL OF MERCURY(II)	ARTICLE		3	2018	LI LEI;WANG FEIJUN;LV YANYAN;LIU JIANXIN;BIAN; HONGLI;WANG WENJUN;LI YONGHONG;SHAO ZIQIANG	ACS OMEGA	This paper reports the carbon quantum dotsdoped magnetic electrospinning nanofibers for the self-display and removal of Hg(II) ions from water. The fluorescent carbon quantum dots and magnetic Fe3O4 nanoparticles were pre-prepared successfully, and they appeared to be homogeneously dispersed in nanofibers via electrospinning. During the sorption of Hg(II) ions, the significant fluorescence signal…	CQDs-Doped Magnetic Electrospun Nanofibers: Fluorescence Self-Display and Adsorption Removal of Mercury(II)		none	SCH MAT SCI AND ENGN;BEIJING ENGN RES CTR CELLULOSE AND ITS DERIVAT;SCH MAT SCI AND ENGN;BEIJING ENGN RES CTR CELLULOSE AND ITS DERIVAT	SCH MAT SCI AND ENGN		LI L, 2018, ACS OMEGA	LI L, 2018, ACS OMEGA	1155 16TH ST, NW, WASHINGTON, DC 20036 USA	BEIJING INSTITUTE OF TECHNOLOGY		WANGFJ@BIT.EDU.CN		2025-11-07	GD0OO				GRADUATE TECHNOLOGICAL INNOVATION PROJECT OF BEIJING INSTITUTE OF TECHNOLOGY (BIT) [2017CX10023]	THIS WORK WAS SUPPORTED BY THE GRADUATE TECHNOLOGICAL INNOVATION PROJECT OF BEIJING INSTITUTE OF TECHNOLOGY (BIT) (GRANT NUMBER 2017CX10023). WE ALSO VERY APPRECIATIVE OF THE INSTRUMENTAL ANALYSIS CENTER OF BIT.	APR
SUN Y;LI X;ZHENG W	PHASE-TRANSITED LYSOZYME; MERCURY IONS; ADSORPTION; MAGNETISM	PHASE-TRANSITED LYSOZYME; MERCURY IONS; ADSORPTION; MAGNETISM		SUN, Y (CORRESPONDING AUTHOR), SOUTHEAST UNIV, SCH CIVIL ENGN, NANJING 210096, PEOPLES R CHINA.; SUN, YUE; LI, XIAO; ZHENG, WEISHENG, SOUTHEAST UNIV, SCH CIVIL ENGN, DEPT MUNICIPAL ENGN, NANJING 210096, PEOPLES R CHINA.	J. HAZARD. MATER.	ADSORPTION USING NANOMATERIALS IS CONSIDERED AN EFFECTIVE METHOD FOR CONTROLLING THE LEVELS OF TOXIC HEAVY METAL IN WASTEWATER. HEREIN, A NOVEL ADSORBENT, CORE-SHELL PHASE-TRANSITED LYSOZYME FILM-COATED MAGNETIC NANO PARTICLES (FE3O4@SIO2@PTL) FOR HG(II) IONS REMOVAL FROM AQUEOUS SOLUTIONS WAS EXPLORED VIA FACILE AND FAST PHASE TRANSFORMATION AND SELF-ASSEMBLY PROCESS OF LYSOZYME. THE PHYSIOCHEMI…		SUN, Y (CORRESPONDING AUTHOR), SOUTHEAST UNIV, SCH CIVIL ENGN, NANJING 210096, PEOPLES R CHINA	10.1016/j.jhazmat.2020.124012		0304-3894	JOURNAL OF HAZARDOUS MATERIALS	ENGLISH	43					ELSEVIER	ISI	FACILE SYNTHESIS OF CORE-SHELL PHASE-TRANSITED LYSOZYME COATED MAGNETIC NANOPARTICLE AS A NOVEL ADSORBENT FOR HG(II) REMOVAL IN AQUEOUS SOLUTIONS	ARTICLE		403	2021	SUN YUE;LI XIAO;ZHENG WEISHENG	J HAZARD MATER	Adsorption using nanomaterials is considered an effective method for controlling the levels of toxic heavy metal in wastewater. Herein, a novel adsorbent, core-shell phase-transited lysozyme film-coated magnetic nano particles (Fe3O4@SiO2@PTL) for Hg(II) ions removal from aqueous solutions was explored via facile and fast phase transformation and self-assembly process of lysozyme. The physiochemi…	Facile synthesis of core-shell phase-transited lysozyme coated magnetic nanoparticle as a novel adsorbent for Hg(II) removal in aqueous solutions	Phase-transited lysozyme; Mercury ions; Adsorption; Magnetism	none	SOUTHEAST UNIV;SOUTHEAST UNIV	SOUTHEAST UNIV		SUN Y, 2021, J HAZARD MATER	SUN Y, 2021, J HAZARD MATER	RADARWEG 29, 1043 NX AMSTERDAM, NETHERLANDS	SOUTHEAST UNIVERSITY - CHINA	124012	SYCYSEU@163.COM		2025-11-07	PA8EP	1873-3336			NATIONAL NATURAL SCIENCE FOUNDATION OF CHINA [51578131]	THIS WORK WAS SUPPORTED BY THE NATIONAL NATURAL SCIENCE FOUNDATION OF CHINA (NO. 51578131).	FEB 5
MAHMOUD M;YAKOUT A;HUSSEIN K;OSMAN M	MAGNETIC ACCUMULATION; REMOVAL; HEAVY METALS; HYDROXYLAMINE; MAGNETIC; NANO-IRON OXIDE; SOLID-PHASE EXTRACTION; HEAVY-METAL IONS; WATER-TREATMENT; ACTIVATED; CARBON; BAKERS YEAST; ADSORPTION; SORBENTS; SURFACE; ACID	MAGNETIC ACCUMULATION; REMOVAL; HEAVY METALS; HYDROXYLAMINE; MAGNETIC; NANO-IRON OXIDE	SOLID-PHASE EXTRACTION; HEAVY-METAL IONS; WATER-TREATMENT; ACTIVATED; CARBON; BAKERS YEAST; REMOVAL; ADSORPTION; SORBENTS; SURFACE; ACID	MAHMOUD, ME (CORRESPONDING AUTHOR), ALEXANDRIA UNIV, DEPT CHEM, FAC SCI, POB 426, ALEXANDRIA 21321, EGYPT.; MAHMOUD, MOHAMED E.; YAKOUT, AMR A.; HUSSEIN, KHOLOUD H.; OSMAN, MAHER M., ALEXANDRIA UNIV, DEPT CHEM, FAC SCI, POB 426, ALEXANDRIA 21321, EGYPT.; YAKOUT, AMR A., NORTH JEDDAH KING ABDULAZIZ UNIV, FAC SCI, DEPT CHEM, JEDDAH, SAUDI ARABIA.	J. ENVIRON. CHEM. ENG.	A MAGNETIC NANO-SORBENT WAS SYNTHESIZED VIA DIRECT SURFACE IMPREGNATION OF DIOCTYL PHTHALATE (DOP) ON MAGNETIC NANO-IRON OXIDE (NANO-FE3O4) FOR THE FORMATION OF (NANO-FE3O4-DOP). THE PRODUCED MATERIAL WAS FURTHER FUNCTIONALIZED WITH NITROGEN AND OXYGEN DONOR ATOMS BY SURFACE IMMOBILIZATION OF HYDROXYLAMINE FOR THE FORMATION OF A NOVEL MAGNETIC NANO-SORBENT (NANO-FE3O4-DOP-HA). THIS WAS IDENTIFIED…		MAHMOUD, ME (CORRESPONDING AUTHOR), ALEXANDRIA UNIV, DEPT CHEM, FAC SCI, POB 426, ALEXANDRIA 21321, EGYPT	10.1016/j.jece.2015.03.024		2213-2929	JOURNAL OF ENVIRONMENTAL CHEMICAL ENGINEERING	ENGLISH	21	2	843-851			ELSEVIER SCI LTD	ISI	MAGNETIC ACCUMULATION AND EXTRACTION OF CD(II), HG(II) AND PB(II) BY A NOVEL NANO-FE3O4-COATED-DIOCTYLPHTHALATE-IMMOBILIZEDHYDR OXYLAMINE	ARTICLE		3	2015	MAHMOUD MOHAMED E;YAKOUT AMR A;HUSSEIN KHOLOUD H; OSMAN MAHER M	J ENVIRON CHEM ENG	A magnetic nano-sorbent was synthesized via direct surface impregnation of dioctyl phthalate (Dop) on magnetic nano-iron oxide (nano-Fe3O4) for the formation of (nano-Fe3O4-Dop). The produced material was further functionalized with nitrogen and oxygen donor atoms by surface immobilization of hydroxylamine for the formation of a novel magnetic nano-sorbent (nano-Fe3O4-Dop-HA). This was identified…	Magnetic accumulation and extraction of Cd(II), Hg(II) and Pb(II) by a novel nano-Fe3O4-coated-dioctylphthalate-immobilizedhydr oxylamine	Magnetic accumulation; Removal; Heavy metals; Hydroxylamine; Magnetic; nano-iron oxide	none	ALEXANDRIA UNIV;ALEXANDRIA UNIV;NORTH JEDDAH KING ABDULAZIZ UNIV	ALEXANDRIA UNIV		MAHMOUD M, 2015, J ENVIRON CHEM ENG	MAHMOUD M, 2015, J ENVIRON CHEM ENG	THE BOULEVARD, LANGFORD LANE, KIDLINGTON, OXFORD OX5 1GB, OXON, ENGLAND	EGYPTIAN KNOWLEDGE BANK (EKB); ALEXANDRIA UNIVERSITY; KING ABDULAZIZ UNIVERSITY		MEMAHMOUD10@HOTMAIL.COM AAYAKOUT@YAHOO.COM KHOLOUDHAMZA135@YAHOO.COM MAHER\_OSMAN@YAHOO.COM		2025-11-07	V2W9T	2213-3437					JUN
LI J;LIN G;TAN F;FU L;ZENG B;WANG S;HU T;ZHANG L	MAGNETIC MOF; ADSORPTION; MERCURY; WASTEWATER; SELECTIVITY; EFFICIENT REMOVAL; CR(VI); HG(II); CONSTRUCTION; POLYMERS; EXCHANGE; HG2+; MOF	MAGNETIC MOF; ADSORPTION; MERCURY; WASTEWATER; SELECTIVITY	EFFICIENT REMOVAL; CR(VI); HG(II); CONSTRUCTION; POLYMERS; EXCHANGE; HG2+; MOF	LIN, G (CORRESPONDING AUTHOR), KUNMING UNIV SCI \& TECHNOL, STATE KEY LAB COMPLEX NONFERROUS MET RESOURCES CLE, KUNMING 650093, YUNNAN, PEOPLES R CHINA.; LIN, GUO; TAN, FANGGUAN; FU, LIKANG; WANG, SHIXING; HU, TU; ZHANG, LIBO, KUNMING UNIV SCI \& TECHNOL, STATE KEY LAB COMPLEX NONFERROUS MET RESOURCES CLE, KUNMING 650093, YUNNAN, PEOPLES R CHINA.; LI, JING; LIN, GUO; ZENG, BIAO, WUHAN UNIV SCI \&…	J. COLLOID INTERFACE SCI.	IN THE CONTEXT OF INDUSTRIALIZATION AND SEVERE WASTEWATER POLLUTION, MERCURY IONS POSE A MAJOR THREAT DUE TO THEIR HIGH TOXICITY. HOWEVER, TRADITIONAL ADSORBENTS AND COMMON METAL-ORGANIC FRAMEWORK (MOF) MATERIALS HAVE LIMITED EFFECTIVENESS. THIS STUDY FOCUSES ON COMBINING MAGNETIC MATERIALS WITH FUNCTIONALIZED TITANIUM-BASED MOF COMPOSITE (SNN-MIL-125(TI)@FE3O4) TO IMPROVE MERCURY ION ADSORPTION.…		LIN, G (CORRESPONDING AUTHOR), KUNMING UNIV SCI \& TECHNOL, STATE KEY LAB COMPLEX NONFERROUS MET RESOURCES CLE, KUNMING 650093, YUNNAN, PEOPLES R CHINA	10.1016/j.jcis.2023.08.022		0021-9797	JOURNAL OF COLLOID AND INTERFACE SCIENCE	ENGLISH	51		659-668			ACADEMIC PRESS INC ELSEVIER SCIENCE	ISI	SELECTIVE ADSORPTION OF MERCURY ION FROM WATER BY A NOVEL FUNCTIONALIZED MAGNETIC TI BASED METAL-ORGANIC FRAMEWORK COMPOSITE	ARTICLE		651	2023	LI JING;LIN GUO;TAN FANGGUAN;FU LIKANG;ZENG BIAO;WANG SHIXING;HU TU;ZHANG LIBO	J COLLOID INTERFACE SCI	In the context of industrialization and severe wastewater pollution, mercury ions pose a major threat due to their high toxicity. However, traditional adsorbents and common metal-organic framework (MOF) materials have limited effectiveness. This study focuses on combining magnetic materials with functionalized titanium-based MOF composite (SNN-MIL-125(Ti)@Fe3O4) to improve mercury ion adsorption.…	Selective adsorption of mercury ion from water by a novel functionalized magnetic Ti based metal-organic framework composite	Magnetic MOF; Adsorption; Mercury; Wastewater; Selectivity	none	KUNMING UNIV SCI AND TECHNOL;KUNMING UNIV SCI AND TECHNOL;WUHAN UNIV SCI AND TECHNOL	KUNMING UNIV SCI AND TECHNOL		LI J, 2023, J COLLOID INTERFACE SCI	LI J, 2023, J COLLOID INTERFACE SCI	525 B ST, STE 1900, SAN DIEGO, CA 92101-4495 USA	KUNMING UNIVERSITY OF SCIENCE \& TECHNOLOGY; WUHAN UNIVERSITY OF SCIENCE \& TECHNOLOGY		GUOLIN@KUST.EDU.CN		2025-11-07	R5HI3	1095-7103	AUG 2023		YUNNAN FUNDAMENTAL RESEARCH PROJECTS [202201BE070001-003, 202101BE070001-022]; HUBEI PROVINCIAL NATURAL SCIENCE FOUNDATION [2022CFB628]	THIS WORK WAS SUPPORTED BY YUNNAN FUNDAMENTAL RESEARCH PROJECTS (GRANT NOS. 202201BE070001-003 AND 202101BE070001-022) AND HUBEI PROVINCIAL NATURAL SCIENCE FOUNDATION (2022CFB628).	DEC
VATANDOOST M;MOHAMMADI M;AKHLAGHIAN ;FARANAK F	MERCURY; ADSORPTION; FE-MN MAGNETIC ADSORBENT; WASTEWATER TREATMENT; FLY-ASH; NANOPARTICLES; HG(II); IONS	MERCURY; ADSORPTION; FE-MN MAGNETIC ADSORBENT; WASTEWATER TREATMENT	FLY-ASH; NANOPARTICLES; ADSORPTION; HG(II); IONS	AKHLAGHIAN, F (CORRESPONDING AUTHOR), UNIV KURDISTAN, FAC ENGN, DEPT CHEM ENGN, SANANDAJ, IRAN.; VATANDOOST, MONA; MOHAMMADI, MOHAMMAD MEHDI MALEK; AKHLAGHIAN, FARANAK, UNIV KURDISTAN, FAC ENGN, DEPT CHEM ENGN, SANANDAJ, IRAN.	DESALIN. WATER TREAT.	IN THIS WORK, FE-MN MAGNETIC ADSORBENT WAS USED TO REMOVE MERCURY FROM WASTEWATER. THIS RESEARCH CHARACTERIZES THE STRUCTURAL PROPERTIES OF THE ADSORBENT AND ALSO INVESTIGATES THE EFFECTS OF THE OPERATING CONDITIONS TO EVALUATE THE ADSORBENT EFFECTIVENESS FOR WATER TREATMENT APPLICATIONS. IN THE ADSORBENT PREPARATION STAGE, THE MNCL2 CONCENTRATION IN THE SOLUTION WAS CHOSEN AT 0.03 MOL/L TO SYNTH…		AKHLAGHIAN, F (CORRESPONDING AUTHOR), UNIV KURDISTAN, FAC ENGN, DEPT CHEM ENGN, SANANDAJ, IRAN	10.1016/j.dwt.2024.100359		1944-3994	DESALINATION AND WATER TREATMENT	ENGLISH	3					ELSEVIER SCIENCE INC	ISI	USE OF FE-MN MAGNETIC ADSORBENT TO REMOVE MERCURY FROM WASTEWATER	ARTICLE		318	2024	VATANDOOST MONA;MOHAMMADI MOHAMMAD MEHDI MALEK;AKHLAGHIAN; FARANAK	DESALIN WATER TREAT	In this work, Fe-Mn magnetic adsorbent was used to remove mercury from wastewater. This research characterizes the structural properties of the adsorbent and also investigates the effects of the operating conditions to evaluate the adsorbent effectiveness for water treatment applications. In the adsorbent preparation stage, the MnCl2 concentration in the solution was chosen at 0.03 mol/L to synth…	Use of Fe-Mn magnetic adsorbent to remove mercury from wastewater	Mercury; Adsorption; Fe-Mn magnetic adsorbent; Wastewater treatment	none	UNIV KURDISTAN;UNIV KURDISTAN	UNIV KURDISTAN		VATANDOOST M, 2024, DESALIN WATER TREAT	VATANDOOST M, 2024, DESALIN WATER TREAT	STE 800, 230 PARK AVE, NEW YORK, NY 10169 USA	UNIVERSITY OF KURDISTAN	100359	FR.AKHLAGHIAN@UOK.AC.IR		2025-11-07	I8X8L	1944-3986	MAY 2024				APR
BAO S;WANG Y;YU Y;YANG W;SUN Y	GRAPHENE OXIDE; SULFYDRYL; HG(II); WASTEWATER; PPB LEVEL	GRAPHENE OXIDE; SULFYDRYL; HG(II); WASTEWATER; PPB LEVEL		YU, YS (CORRESPONDING AUTHOR), JILIN NORMAL UNIV, MINIST EDUC, KEY LAB FUNCT MAT PHYS \& CHEM, CHANGCHUN 130103, PEOPLES R CHINA.; BAO, SHUANGYOU; YU, YONGSHENG, JILIN NORMAL UNIV, MINIST EDUC, KEY LAB FUNCT MAT PHYS \& CHEM, CHANGCHUN 130103, PEOPLES R CHINA.; BAO, SHUANGYOU; WANG, YINGJUN; YANG, WEIWEI; SUN, YINYONG, HARBIN INST TECHNOL, SCH CHEM \& CHEM ENGN, MIIT KEY LAB CRIT MAT TECHNOL NEW …	ENVIRON. POLLUT.	IT IS HIGHLY DESIRABLE BUT REMAINS EXTREMELY CHALLENGING TO DEVELOP A FACILE STRATEGY TO PREPARE ADSORBENT FOR DEALING WITH HEAVY METAL POLLUTION IN WATER. HERE, WE REPORT A FACILE APPROACH FOR PREPARING SULFYDRYL-FUNCTIONALIZED GRAPHENE OXIDE (S-GO) BY CROSS-LINKING METHOD WITH AN UNPRECEDENTED ADSORPTION CAPACITY AND ULTRAHIGH SELECTIVITY FOR EFFICIENT HG(II) REMOVAL. THE ADSORBENTS EXHIBIT A P…		YU, YS (CORRESPONDING AUTHOR), JILIN NORMAL UNIV, MINIST EDUC, KEY LAB FUNCT MAT PHYS \& CHEM, CHANGCHUN 130103, PEOPLES R CHINA	10.1016/j.envpol.2020.116378		0269-7491	ENVIRONMENTAL POLLUTION	ENGLISH	23					ELSEVIER SCI LTD	ISI	CROSS-LINKED SULFYDRYL-FUNCTIONALIZED GRAPHENE OXIDE AS ULTRA-HIGH CAPACITY ADSORBENT FOR HIGH SELECTIVITY AND PPB LEVEL REMOVAL OF MERCURY FROM WATER UNDER WIDE PH RANGE	ARTICLE		271	2021	BAO SHUANGYOU;WANG YINGJUN;YU YONGSHENG;YANG WEIWEI; SUN YINYONG	ENVIRON POLLUT	It is highly desirable but remains extremely challenging to develop a facile strategy to prepare adsorbent for dealing with heavy metal pollution in water. Here, we report a facile approach for preparing sulfydryl-functionalized graphene oxide (S-GO) by cross-linking method with an unprecedented adsorption capacity and ultrahigh selectivity for efficient Hg(II) removal. The adsorbents exhibit a p…	Cross-linked sulfydryl-functionalized graphene oxide as ultra-high capacity adsorbent for high selectivity and ppb level removal of mercury from water under wide pH range	Graphene oxide; Sulfydryl; Hg(II); Wastewater; ppb level	none	JILIN NORMAL UNIV;JILIN NORMAL UNIV;SCH CHEM AND CHEM ENGN	JILIN NORMAL UNIV		BAO S, 2021, ENVIRON POLLUT	BAO S, 2021, ENVIRON POLLUT	125 LONDON WALL, LONDON, ENGLAND	JILIN NORMAL UNIVERSITY; HARBIN INSTITUTE OF TECHNOLOGY	116378	YUYONGSHENG@JLNU.EDU.CN		2025-11-07	QB4MH	1873-6424	JAN 2021		NATIONAL NATURAL SCIENCE FOUNDATION OF CHINA [51571072, 51871078]; HEILONGJIANG SCIENCE FOUNDATION [E2018028]	THIS WORK WAS SUPPORTED BY THE NATIONAL NATURAL SCIENCE FOUNDATION OF CHINA UNDER GRANT (NO. 51571072 AND 51871078) AND HEILONGJIANG SCIENCE FOUNDATION (NO. E2018028).	FEB 15
ZIRPE M;THAKUR J	NANOCOMPOSITE; CADMIUM; MERCURY; POLYMER; ISOTHERM; ETC; ADSORBENT; NANOPARTICLES; ADSORPTION	NANOCOMPOSITE; CADMIUM; MERCURY; POLYMER; ISOTHERM; ETC	ADSORBENT; NANOPARTICLES; ADSORPTION	THAKUR, J (CORRESPONDING AUTHOR), CHANGU KANA THAKUR ARTS COMMERCE \& SCI COLL, NEW PANVEL W, MAHARASHTRA, INDIA.; ZIRPE, MAHESHWARI, RAMSHETH THAKUR COLL COMMERCE \& SCI, DEPT CHEM, NAVI MUMBAI, MAHARASHTRA, INDIA.; ZIRPE, MAHESHWARI; THAKUR, JYOTSNA, CHANGU KANA THAKUR ARTS COMMERCE \& SCI COLL, DEPT CHEM, NEW PANVEL W, MAHARASHTRA, INDIA.; THAKUR, JYOTSNA, CHANGU KANA THAKUR ARTS COMMERCE \& S…	SEP. SCI. TECHNOL.	HEAVY METALS SUCH AS MERCURY AND CADMIUM ARE HIGHLY CYTOTOXIC METALS WHEN RELEASED INTO THE ENVIRONMENT AND POSE SERIOUS HAZARDS TO THE ECOSYSTEM. THE CURRENT STUDY INTRODUCES CMC/FE3O4 NANOCOMPOSITE AS AN EFFECTIVE, MAGNETICALLY RECYCLABLE, LOW-COST, AND ENVIRONMENT-FRIENDLY BIOPOLYMER-BASED ADSORBENT FOR REMOVING THESE HARMFUL CONTAMINANTS FROM WASTE WATER. THIS NANOCOMPOSITE WAS SYNTHESIZED BY…		THAKUR, J (CORRESPONDING AUTHOR), CHANGU KANA THAKUR ARTS COMMERCE \& SCI COLL, NEW PANVEL W, MAHARASHTRA, INDIA	10.1080/01496395.2023.2225733		0149-6395	SEPARATION SCIENCE AND TECHNOLOGY	ENGLISH	2	1516	2692-2703			TAYLOR \& FRANCIS INC	ISI	MAGNETICALLY RECOVERABLE CMC/FE3O4 NANOCOMPOSITE FOR EFFICIENT REMOVAL OF HG(II) AND CD(II) IONS FROM THE AQUEOUS SOLUTION	ARTICLE		58	2023	ZIRPE MAHESHWARI;THAKUR JYOTSNA	SEP SCI TECHNOL	Heavy metals such as Mercury and Cadmium are highly cytotoxic metals when released into the environment and pose serious hazards to the ecosystem. The current study introduces CMC/Fe3O4 nanocomposite as an effective, magnetically recyclable, low-cost, and environment-friendly biopolymer-based adsorbent for removing these harmful contaminants from waste water. This nanocomposite was synthesized by…	Magnetically Recoverable CMC/Fe3O4 Nanocomposite for Efficient Removal of Hg(II) and Cd(II) ions from the Aqueous Solution	Nanocomposite; Cadmium; Mercury; Polymer; Isotherm; etc	none	CHANGU KANA THAKUR ARTS COMMERCE AND SCI COLL;RAMSHETH THAKUR COLL COMMERCE AND SCI;CHANGU KANA THAKUR ARTS COMMERCE AND SCI COLL;CHANGU KANA THAKUR ARTS COMMERCE AND SCI COLL	CHANGU KANA THAKUR ARTS COMMERCE AND SCI COLL		ZIRPE M, 2023, SEP SCI TECHNOL	ZIRPE M, 2023, SEP SCI TECHNOL	530 WALNUT STREET, STE 850, PHILADELPHIA, PA 19106 USA			THAKURJYOTSNA@GMAIL.COM		2025-11-07	EH4V4	1520-5754	JUN 2023				NOV 2
NAUSHAD M;AHAMAD T;ALOTHMAN Z;AL-MUHTASEB ;ALA'A H A	CURCUMIN; BIO-COMPOSITE; TOXIC METAL; HG(II); ADSORPTION; KINETICS; NANO-COMPOSITE ADSORBENT; MODIFIED FLY-ASH; EFFICIENT REMOVAL; WASTE-WATER; MERCURY REMOVAL; HEAVY-METALS; CARBON; SURFACE; EQUILIBRIUM; FABRICATION	CURCUMIN; BIO-COMPOSITE; TOXIC METAL; HG(II); ADSORPTION; KINETICS	NANO-COMPOSITE ADSORBENT; MODIFIED FLY-ASH; EFFICIENT REMOVAL; WASTE-WATER; MERCURY REMOVAL; HEAVY-METALS; CARBON; SURFACE; EQUILIBRIUM; FABRICATION	NAUSHAD, M (CORRESPONDING AUTHOR), KING SAUD UNIV, COLL SCI, CHEM DEPT, ADV MAT RES CHAIR, RIYADH 11451, SAUDI ARABIA.; AL-MUHTASEB, AH (CORRESPONDING AUTHOR), SULTAN QABOOS UNIV, DEPT PETR \& CHEM ENGN, FAC ENGN, MUSCAT, OMAN.; NAUSHAD, MU; ALOTHMAN, ZEID A., KING SAUD UNIV, COLL SCI, CHEM DEPT, ADV MAT RES CHAIR, RIYADH 11451, SAUDI ARABIA.; AHAMAD, TANSIR, KING SAUD UNIV, COLL SCI, CHEM DEPT, …	J. MOL. LIQ.	MAGNETIC BIO-COMPOSITE WAS FABRICATED USING CURCUMIN AND FE3O4 NANOPARTICLES. THE STRUCTURE AND MORPHOLOGY OF THE RESIN (CG) AND THE CURCUMIN BASED MAGNETIC NANOCOMPOSITE (CMNC) WAS ANALYZED BY SEVERAL TECHNIQUES. THE CMNC WAS APPLIED AS AN ADSORBENT WHICH REVEALED OUTSTANDING ABILITIES FOR THE ADSORPTION OF HG(II) IONS. THE EQUILIBRIUM DATA COINCIDED WITH THE LANGMUIR ADSORPTION ISOTHERM INDICAT…		NAUSHAD, M (CORRESPONDING AUTHOR), KING SAUD UNIV, COLL SCI, CHEM DEPT, ADV MAT RES CHAIR, RIYADH 11451, SAUDI ARABIA	10.1016/j.molliq.2019.01.090		0167-7322	JOURNAL OF MOLECULAR LIQUIDS	ENGLISH	143		1-8			ELSEVIER	ISI	GREEN AND ECO-FRIENDLY NANOCOMPOSITE FOR THE REMOVAL OF TOXIC HG(II) METAL ION FROM AQUEOUS ENVIRONMENT: ADSORPTION KINETICS \& UPDATES ISOTHERM MODELLING	ARTICLE		279	2019	NAUSHAD MU;AHAMAD TANSIR;ALOTHMAN ZEID A;AL-MUHTASEB; ALA'A H	J MOL LIQ	Magnetic bio-composite was fabricated using curcumin and Fe3O4 nanoparticles. The structure and morphology of the resin (CG) and the curcumin based magnetic nanocomposite (CMNC) was analyzed by several techniques. The CMNC was applied as an adsorbent which revealed outstanding abilities for the adsorption of Hg(II) ions. The equilibrium data coincided with the Langmuir adsorption isotherm indicat…	Green and eco-friendly nanocomposite for the removal of toxic Hg(II) metal ion from aqueous environment: Adsorption kinetics \& updates isotherm modelling	Curcumin; Bio-composite; Toxic metal; Hg(II); Adsorption; Kinetics	none	KING SAUD UNIV;SULTAN QABOOS UNIV;KING SAUD UNIV;KING SAUD UNIV;SULTAN QABOOS UNIV	KING SAUD UNIV		NAUSHAD M, 2019, J MOL LIQ	NAUSHAD M, 2019, J MOL LIQ	RADARWEG 29, 1043 NX AMSTERDAM, NETHERLANDS	KING SAUD UNIVERSITY; KING SAUD UNIVERSITY; SULTAN QABOOS UNIVERSITY		MNAUSHAD@KSU.EDU.SA MUHTASEB@SQU.EDU.OM		2025-11-07	HQ0RD	1873-3166			DEANSHIP OF SCIENTIFIC RESEARCH, KING SAUD UNIVERSITY	THE AUTHORS ARE GRATEFUL TO THE DEANSHIP OF SCIENTIFIC RESEARCH, KING SAUD UNIVERSITY FOR FUNDING THROUGH VICE DEANSHIP OF SCIENTIFIC RESEARCH CHAIRS.	APR 1
EL-WAKEEL S	HEAVY METALS; MAGNETITE NANOPARTICLES; HYDROXYAPATITE; ADSORPTION; LEAD; MERCURY; ARSENIC; OXIDE NANOPARTICLES; WASTE-WATER; COMPOSITE; CARBON; SOIL	HEAVY METALS; MAGNETITE NANOPARTICLES; HYDROXYAPATITE; ADSORPTION; LEAD; MERCURY; ARSENIC	OXIDE NANOPARTICLES; WASTE-WATER; ADSORPTION; COMPOSITE; CARBON; SOIL	EL-WAKEEL, ST (CORRESPONDING AUTHOR), NATL RES CTR, WATER POLLUT RES DEPT, ENVIRONM RES DIV, 33 EL BOHOUTH ST, GIZA 12622, EGYPT.; EL-WAKEEL, SHAIMAA T., NATL RES CTR, WATER POLLUT RES DEPT, ENVIRONM RES DIV, 33 EL BOHOUTH ST, GIZA 12622, EGYPT.	DESALIN. WATER TREAT.	IN THIS STUDY IRON WASTE FROM THE STEEL INDUSTRY AND EGGSHELLS BIOMASS WERE USED TO PREPARE THE ENVIRONMENTALLY-FRIENDLY MAGNETIC HYDROXYAPATITE COMPOSITE. THE PREPARED COMPOSITE WAS CHARACTERIZED AND APPLIED FOR PB(II), HG(II) AND AS(III) REMOVAL FROM AQUEOUS SOLUTION. BATCH EXPERIMENTS SHOW THE ADSORPTION CAPACITY TO BE 348.3, 291.4 AND 266.2 MG/G FOR PB(II), HG(II) AND AS(III) RESPECTIVELY, BY…		EL-WAKEEL, ST (CORRESPONDING AUTHOR), NATL RES CTR, WATER POLLUT RES DEPT, ENVIRONM RES DIV, 33 EL BOHOUTH ST, GIZA 12622, EGYPT	10.5004/dwt.2021.27696		1944-3994	DESALINATION AND WATER TREATMENT	ENGLISH	1		155-163			DESALINATION PUBL	ISI	EFFICIENT REMOVAL OF PB(II), HG(II) AND AS(III) IONS BY A RECYCLABLE LOW COST MAGNETIC HYDROXYAPATITE NANOCOMPOSITE FROM AQUEOUS SOLUTION	ARTICLE		236	2021	EL-WAKEEL SHAIMAA T	DESALIN WATER TREAT	In this study iron waste from the steel industry and eggshells biomass were used to prepare the environmentally-friendly magnetic hydroxyapatite composite. The prepared composite was characterized and applied for Pb(II), Hg(II) and As(III) removal from aqueous solution. Batch experiments show the adsorption capacity to be 348.3, 291.4 and 266.2 mg/g for Pb(II), Hg(II) and As(III) respectively, by…	Efficient removal of Pb(II), Hg(II) and As(III) ions by a recyclable low cost magnetic hydroxyapatite nanocomposite from aqueous solution	Heavy metals; Magnetite nanoparticles; Hydroxyapatite; Adsorption; Lead; Mercury; Arsenic	none	NATL RES CTR;NATL RES CTR	NATL RES CTR		EL-WAKEEL S, 2021, DESALIN WATER TREAT	EL-WAKEEL S, 2021, DESALIN WATER TREAT	36 WALCOTT VALLEY DRIVE,, HOPKINTON, MA 01748 USA	EGYPTIAN KNOWLEDGE BANK (EKB); NATIONAL RESEARCH CENTRE (NRC)		SHAIMAA\_TW@YAHOO.COM		2025-11-07	WU1PQ	1944-3986					OCT
SONG D;HUANG T;FENG Y;XIE S;WANG C;FANG Q;WANG B;ZHANG S;REN ;JIE J	MERCURY CONTAMINATION; NONTHERMAL PLASMA; ZERO-VALENT IRON-CARBON; GALVANIC CELLS; THIOL FUNCTIONALIZATION; MULTICHANNEL MECHANISM; AQUEOUS-SOLUTION; REMOVAL; ISOTHERM; SURFACE; EFFICIENT	MERCURY CONTAMINATION; NONTHERMAL PLASMA; ZERO-VALENT IRON-CARBON; GALVANIC CELLS; THIOL FUNCTIONALIZATION; MULTICHANNEL MECHANISM	AQUEOUS-SOLUTION; REMOVAL; ISOTHERM; SURFACE; EFFICIENT	SONG, DP; HUANG, T (CORRESPONDING AUTHOR), CHANGSHU INST TECHNOL, SCH MAT ENGN, CHANGSHU 215500, PEOPLES R CHINA.; REN, J (CORRESPONDING AUTHOR), KING FAHD UNIV PETR \& MINERALS, INTERDISCIPLINARY RES CTR CONSTRUCT \& BLDG MAT, DEPT MAT SCI \& ENGN, DHAHRAN 31261, SAUDI ARABIA.; SONG, DONGPING; HUANG, TAO; FENG, YUXUAN; XIE, SHIHONG; WANG, CHENGLONG; FANG, QI; WANG, BAIJUN, CHANGSHU INST TECHNOL,…	J. ENVIRON. MANAGE.	MERCURY (HG) POLLUTION POSES A CRITICAL THREAT TO HUMAN HEALTH AND THE ENVIRONMENT, NECESSITATING URGENT CONTROL MEASURES. THIS STUDY INTRODUCES A NOVEL MODIFICATION METHOD FOR THE COMMON ZERO-VALENT IRON-CARBON (ZVI-AC) GALVANIC CELLS USING A TWO-STEP PROCESS, NONTHERMAL (NTP) IRRADIATION FOLLOWED BY TARGETED FUNCTIONALIZATION, AIMING TO ENHANCE HG ADSORPTION POTENTIAL BY ADJUSTING THE PHYSICOCH…		SONG, DP; HUANG, T (CORRESPONDING AUTHOR), CHANGSHU INST TECHNOL, SCH MAT ENGN, CHANGSHU 215500, PEOPLES R CHINA	10.1016/j.jenvman.2025.124108		0301-4797	JOURNAL OF ENVIRONMENTAL MANAGEMENT	ENGLISH	1					ACADEMIC PRESS LTD- ELSEVIER SCIENCE LTD	ISI	NOVEL ENHANCEMENT STRATEGY FOR HG ADSORPTION IN WASTEWATER: NONTHERMAL PLASMA-MEDIATED ADVANCED MODIFICATION OF ZERO-VALENT IRON-CARBON GALVANIC CELLS WITH THIOL FUNCTIONALIZATION	ARTICLE		375	2025	SONG DONGPING;HUANG TAO;FENG YUXUAN;XIE SHIHONG; WANG CHENGLONG;FANG QI;WANG BAIJUN;ZHANG SHUWEN;REN; JIE	J ENVIRON MANAGE	Mercury (Hg) pollution poses a critical threat to human health and the environment, necessitating urgent control measures. This study introduces a novel modification method for the common zero-valent iron-carbon (ZVI-AC) galvanic cells using a two-step process, nonthermal (NTP) irradiation followed by targeted functionalization, aiming to enhance Hg adsorption potential by adjusting the physicoch…	Novel enhancement strategy for Hg adsorption in wastewater: Nonthermal plasma-mediated advanced modification of zero-valent iron-carbon galvanic cells with thiol functionalization	Mercury contamination; Nonthermal plasma; Zero-valent iron-carbon; galvanic cells; Thiol functionalization; Multichannel mechanism	none	SCH MAT ENGN;KING FAHD UNIV PETR AND MINERALS;SCH MAT ENGN;NORTHEAST PETR UNIV;UNIV SOUTH CHINA;KING FAHD UNIV PETR AND MINERALS	NOTREPORTED;SCH MAT ENGN		SONG D, 2025, J ENVIRON MANAGE	SONG D, 2025, J ENVIRON MANAGE	24-28 OVAL RD, LONDON NW1 7DX, ENGLAND	SUZHOU UNIVERSITY OF TECHNOLOGY; NORTHEAST PETROLEUM UNIVERSITY; UNIVERSITY OF SOUTH CHINA; KING FAHD UNIVERSITY OF PETROLEUM \& MINERALS	124108	SDPXCH@CSLG.EDU.CN HT1104705720@QQ.COM JIE.REN@KFUPM.EDU.SA		2025-11-07	T9M2O	1095-8630	JAN 2025		NATURAL SCIENCE FOUNDATION OF JIANGSU PROVINCE [BK20220691]; EDUCATION DEPARTMENT OF HUNAN PROVINCE, PROJECT OF OUTSTANDING YOUTH [23B0427]	THIS WORK WAS SUPPORTED BY THE NATURAL SCIENCE FOUNDATION OF JIANGSU PROVINCE (BK20220691) AND THE EDUCATION DEPARTMENT OF HUNAN PROVINCE, PROJECT OF OUTSTANDING YOUTH (23B0427).	FEB
[truncated: 198 more rows]
[truncated: 15 more columns]
