# Supplementary material
Source: Royal Society of Chemistry journal article supplement (doi:10.1039/d5en01157d)
Supplement: d5en01157d2.pdf [file d5en01157d2.pdf]

## Electronic Supplementary Material

### **Advances in iron-based nanomaterials for mercury removal in water: trends and mechanisms**

Maycon L. de Oliveira,<sup>a</sup> Larissa Gabrielly R. Mourão,<sup>a</sup> Márcia A. M. S. da Veiga <sup>a\*</sup>.

<sup>a</sup> Department of Chemistry, Laboratory in Applied and Instrumental Analytical Chemistry, Faculty of Philosophy, Science and Letters at Ribeirão Preto, University of São Paulo, 14040-901, Ribeirão Preto – SP, Brazil.

\* Correspondence e-mail: [marcia.veiga@usp.br](mailto:marcia.veiga@usp.br)

## Data collection and Search strategy

The literature survey for the scientometric analysis was conducted in the Scopus and Web of Science databases on 7 November 2025, using the search strings listed in Table S1. These two databases were selected due to their reliability and comprehensive coverage, ensuring consistent acquisition and construction of the dataset. Google Scholar was consulted to verify articles not captured in the merged database; however, because these records were either duplicates or outside the defined scope, they were not included in the final dataset.

**Table S1.** Search strings used in Scopus and Web of Science databases for the scientometric survey on iron-based nanomaterials applied to mercury (Hg) remediation (1995-2025). The search terms were queried using Boolean operators (AND/OR), accounting for variations in mercury nomenclature, iron-based nanomaterials, and environmental matrices. Truncation (\*) was applied to capture term derivatives.

| Database       | String                                                                                                                                                                                                                                                                                                                                                                                                                                                                                                                                |
|----------------|---------------------------------------------------------------------------------------------------------------------------------------------------------------------------------------------------------------------------------------------------------------------------------------------------------------------------------------------------------------------------------------------------------------------------------------------------------------------------------------------------------------------------------------|
| Scopus         | <b>TITLE-ABS-KEY (mercury OR "mercuric" OR "Hg(II)" OR "Hg0" OR "Hg0" OR "methylmercury" OR "methyl mercury") AND TITLE-ABS-KEY ("iron nanoparticle" OR "iron nanoparticles" OR "zero-valent iron" OR "nZVI" OR "iron oxide nanoparticle" OR magnetite OR maghemite OR hematite OR goethite OR "Fe3O4" OR "Fe2O3" OR "Fe(0)" OR "Fe oxide") AND TITLE-ABS-KEY (remediation OR removal OR treat* OR adsorb* OR immobiliz* OR sequestrat* OR capture OR "water" OR "aquatic" OR river OR lake OR groundwater OR "mine" OR "mining")</b> |
| Web of Science | <b>TS=(mercury OR mercuric OR "Hg(II)" OR "methylmercury" OR "methyl mercury") AND TS=("iron nanoparticle" OR "zero-valent iron" OR nZVI OR "iron oxide nanoparticle" OR magnetite OR maghemite OR hematite OR goethite OR "Fe3O4" OR "Fe2O3") AND TS=(remediation OR removal OR treat* OR adsorb* OR immobiliz* OR sequestrat* OR water OR aquatic OR river OR groundwater OR mine OR mining)</b>                                                                                                                                    |

After data export, both datasets were imported into Bibliometrix/Biblioshiny (RStudio) and merged to generate a single dataset and remove duplicate records. The principles guiding data evaluation followed the PRISMA 2020 (Preferred Reporting Items for Systematic Reviews and Meta-Analyses) protocol, which was applied to refine and screen the database. Figure S1 presents the flow chart illustrating the selection process and the final set of studies included in the dataset.

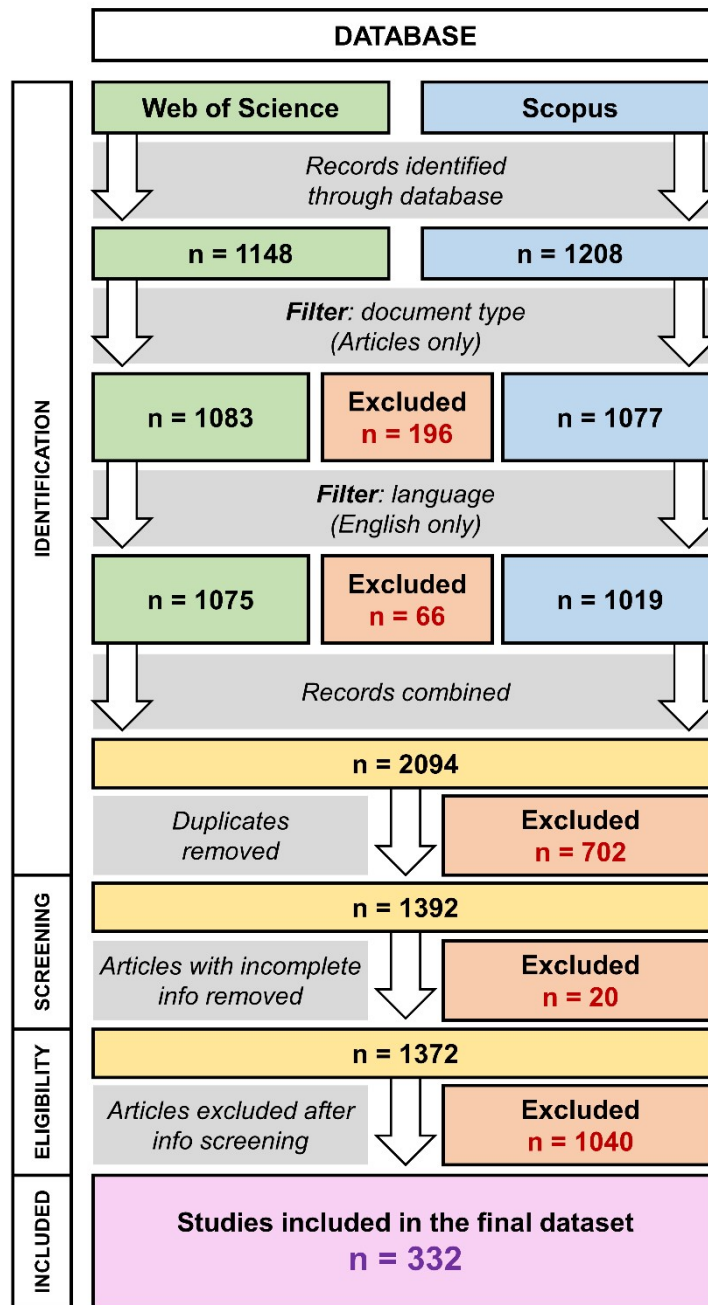

**Figure S1.** PRISMA 2020 flow diagram summarizing the identification, screening, eligibility assessment, and inclusion of studies retrieved from the Web of Science and Scopus databases (1995 – 2025) for the construction of the final dataset (n = 332).

From the final dataset (n = 332), the database was used as the input for analysis in Bibliometrix/Biblioshiny. Table S2-S5 present the general descriptive information and core characteristics of the studies included in the scientometric evaluation.

**Table S2.** Summary of descriptive bibliometric indicators, including publication trends, authorship patterns, and collaboration metrics (1995-2005).

| Description                 | Parameter                       | Results     |
|-----------------------------|---------------------------------|-------------|
| Main information about data | Timespan                        | 1995 : 2025 |
|                             | Sources                         | 143         |
|                             | Documents (doc)                 | 332         |
|                             | Annual Growth Rate (%)          | 9.2         |
|                             | Document Average Age            | 6.9         |
|                             | Average Citations per doc       | 56.39       |
| Documents contents          | Keywords plus (ID)              | 1594        |
|                             | Author's Keywords (DE)          | 844         |
| Authors                     | Authors                         | 1325        |
|                             | Authors of single-authored docs | 6           |
| Authors collaboration       | Single-authored docs            | 6           |
|                             | Co-authors per doc              | 5.38        |
|                             | International co-authorship (%) | 15.41       |

**Table S3.** Country-level scientific output in the final dataset.

| #   | Country      | Freq. | #   | Country      | Freq. | #   | Country     | Freq. |
|-----|--------------|-------|-----|--------------|-------|-----|-------------|-------|
| 1°  | China        | 390   | 17° | Indonesia    | 10    | 33° | Greece      | 3     |
| 2°  | Iran         | 185   | 18° | Brazil       | 9     | 34° | Philippines | 3     |
| 3°  | India        | 61    | 19° | France       | 9     | 35° | Sri Lanka   | 3     |
| 4°  | South Korea  | 49    | 20° | Kazakhstan   | 9     | 36° | Argentina   | 2     |
| 5°  | USA          | 42    | 21° | Malaysia     | 9     | 37° | Cyprus      | 2     |
| 6°  | Portugal     | 37    | 22° | Pakistan     | 9     | 38° | Ecuador     | 2     |
| 7°  | Egypt        | 30    | 23° | Chile        | 7     | 39° | Finland     | 2     |
| 8°  | Spain        | 21    | 24° | Germany      | 7     | 40° | Jordan      | 2     |
| 9°  | Saudi Arabia | 20    | 25° | UK           | 6     | 41° | Oman        | 2     |
| 10° | Mexico       | 18    | 26° | Algeria      | 5     | 42° | Slovakia    | 2     |
| 11° | Australia    | 17    | 27° | Belgium      | 5     | 43° | Turkey      | 2     |
| 12° | Poland       | 13    | 28° | Nigeria      | 5     | 44° | Ukraine     | 2     |
| 13° | Slovenia     | 13    | 29° | South Africa | 5     | 45° | Colombia    | 1     |
| 14° | Thailand     | 11    | 30° | Singapore    | 4     | 46° | Denmark     | 1     |
| 15° | Canada       | 10    | 31° | Sweden       | 4     | 47° | Kenya       | 1     |
| 16° | Ethiopia     | 10    | 32° | Yemen        | 4     | 48° | Morocco     | 1     |

**Table S4.** Annual article production.

| <b>Year</b> | <b>Production</b> | <b>Year</b> | <b>Production</b> | <b>Year</b> | <b>Production</b> | <b>Year</b> | <b>Production</b> |
|-------------|-------------------|-------------|-------------------|-------------|-------------------|-------------|-------------------|
| 1995        | 1                 | 2003        | 1                 | 2011        | 7                 | 2019        | 24                |
| 1996        | 0                 | 2004        | 1                 | 2012        | 11                | 2020        | 36                |
| 1997        | 0                 | 2005        | 0                 | 2013        | 12                | 2021        | 20                |
| 1998        | 0                 | 2006        | 1                 | 2014        | 18                | 2022        | 28                |
| 1999        | 0                 | 2007        | 3                 | 2015        | 21                | 2023        | 23                |
| 2000        | 1                 | 2008        | 3                 | 2016        | 25                | 2024        | 25                |
| 2001        | 0                 | 2009        | 3                 | 2017        | 18                | 2025        | 14                |
| 2002        | 0                 | 2010        | 6                 | 2018        | 29                |             |                   |

**Table S5.** Lotka's Law and cumulative distribution.

| <b>Documents written</b> | <b>N. of Authors</b> | <b>Proportion of Authors</b> | <b>Cumulative</b> | <b>Theoretical</b> |
|--------------------------|----------------------|------------------------------|-------------------|--------------------|
| 1                        | 1087                 | 0.819                        | 0.819             | 0.644              |
| 2                        | 146                  | 0.110                        | 0.929             | 0.161              |
| 3                        | 42                   | 0.032                        | 0.961             | 0.072              |
| 4                        | 17                   | 0.013                        | 0.974             | 0.040              |
| 5                        | 15                   | 0.011                        | 0.985             | 0.026              |
| 6                        | 6                    | 0.005                        | 0.990             | 0.018              |
| 7                        | 8                    | 0.006                        | 0.996             | 0.013              |
| 8                        | 1                    | 0.001                        | 0.997             | 0.010              |
| 10                       | 1                    | 0.001                        | 0.998             | 0.006              |
| 11                       | 1                    | 0.001                        | 0.999             | 0.005              |
| 12                       | 1                    | 0.001                        | 1.000             | 0.004              |
